# Supplementary material
Source: PubMed Central journal article supplement (PMC7777082)
Supplement: pnas.1922392117.sapp.pdf [file pnas.1922392117.sapp.pdf]

# SI Appendix

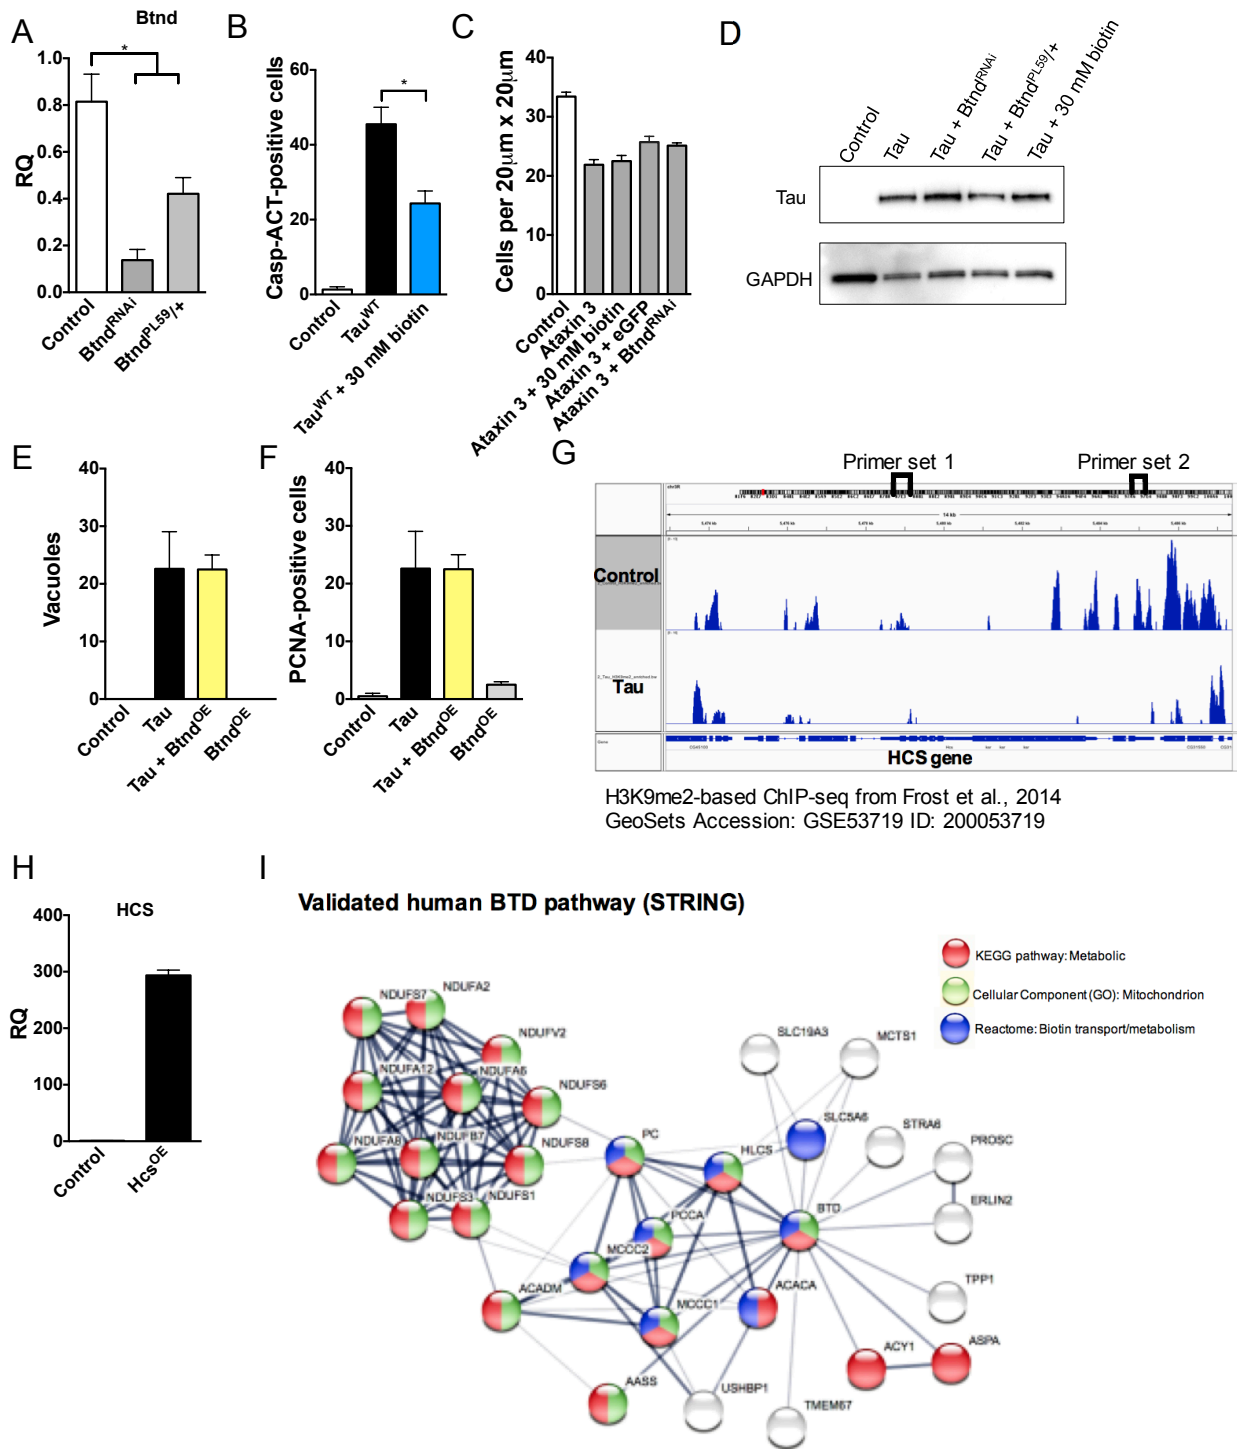

**SI Appendix Figure 1.** A. Verification of reduction in Btnd expression in RNAi and *Btnd*<sup>PL59</sup>/+ loss of function lines. B. Biotin feeding also rescues tau-mediated neurotoxic effects in a wild-type tau *Drosophila* model. C. Biotin feeding does not rescue neurotoxicity in the mutant ataxin 3 *Drosophila* model of spinocerebellar ataxia type 3. D. Total levels of transgenic tau do not change in flies with modified Btnd expression or flies fed biotin. The blot was reprobed with an antibody to GAPDH to illustrate equivalent protein loading. E,F. Overexpression of Btnd with *UAS-Btnd* does not rescue tau<sup>R406W</sup>-mediated neurotoxicity as shown by the number of PCNA-positive cells and vacuole formation. G. Representative trace of H3K9me2 binding within the *Hcs* gene based on ChIP-seq from Frost et al., 2014. Primer sites indicated above. H. Verification of Hcs overexpression by qPCR. I. STRING analysis of human ortholog of the screen hit *BTD* (biotinidase), including known interactors. Control genotype A,C-F: *elav-GAL4/+*. Control genotype B: *elav-GAL4/+; UAS-CD8-PARP-Venus/+*. A-F were analyzed by ANOVA. H was analyzed by t-test. Asterisks indicate \*p<0.05.



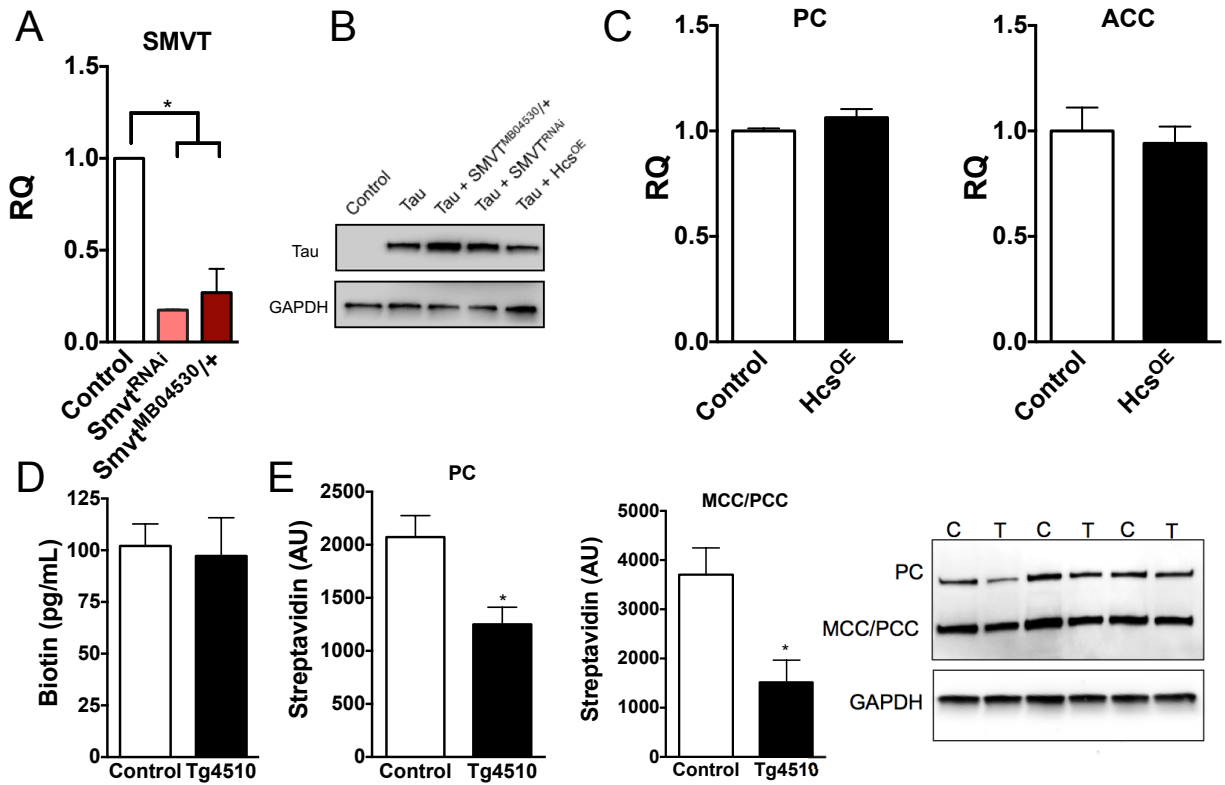

**SI Appendix Figure 2.** A. Verification of reduced Smvt expression by qPCR. B. No change in total human tau levels in tau transgenic flies with Hcs overexpression (Hcs<sup>OE</sup>) or Smvt loss of function (Smvt<sup>RNAi</sup> or Smvt<sup>MB04530/+</sup>). The blot was reprobbed with an antibody to GAPDH to illustrate equivalent protein loading. C. Manipulation of the biotin pathway by Hcs overexpression does not change expression of carboxylases based on qPCR. Control genotype: *elav-GAL4/+*. A,D,E were analyzed by ANOVA. D. 7-month-old rTg4510 tau transgenic mice show no change in tissue biotin level by ELISA. E. Tau transgenic mice have reduced carboxylase biotinylation as shown by streptavidin blotting from cortical tissue homogenates. Mice are rTg4510 CamK2-driven P301L tau aged 7 mo (n = 3 per genotype). C-E were analyzed by t-test. Asterisks indicate \*p<0.05.

**SI Appendix I Table 1. RNAi screen of genetic modifiers of tau<sup>R406W</sup>-mediated neurotoxicity in adult *Drosophila* brain.**

| Line   | Gene       | Flybase ID  | Gene ID | Reagent                | Enhancer or Suppressor | Notes (including references)   | Human orthologs |
|--------|------------|-------------|---------|------------------------|------------------------|--------------------------------|-----------------|
| 48717  | 140up      | FBgn0010340 | CG9852  | VDRC.48717             | Enhancer               | No second RNAi line            | TIMMDC1         |
| 29117  | Acox57D-d  | FBgn0034629 | CG9709  | VDRC.29117             | Enhancer               |                                | ACOX2           |
| 50567  | Acox57D-p  | FBgn0034628 | CG9707  | P{TRiP.GLC01688}attP2  | Enhancer               |                                | ACOX2           |
| 22008  | adp        | FBgn0000057 | CG5124  | VDRC.22008             | Enhancer               | No second RNAi line            | WDTC1           |
| 39015  | Amph       | FBgn0027356 | CG8604  | P{TRiP.HMS01933}attP40 | Enhancer               | Loss of function enhancer, (1) | BIN1            |
| 38272  | AnnX       | FBgn0000084 | CG9579  | P{TRiP.HMS01720}attP40 | Enhancer               |                                | ANXA6           |
| 41880  | AnnX       | FBgn0000084 | CG9579  | P{TRiP.HMS02294}attP2  | Enhancer               |                                | ANXA6           |
| 39013  | Appl       | FBgn0000108 | CG7727  | P{TRiP.HMS01931}attP40 | Enhancer               |                                | APP             |
|        | Appl       | FBgn0000108 | CG7727  | Appl-d                 | Enhancer               |                                | APP             |
| 38983  | aret       | FBgn0000114 | CG31762 | P{TRiP.HMS01899}attP40 | Enhancer               | No second RNAi line            | CELF1           |
| 31959  | Argk       | FBgn0000116 | CG32031 | P{TRiP.JF02699}attP2   | Enhancer               |                                | CKB             |
| 41697  | Argk       | FBgn0000116 | CG32031 | P{TRiP.HMS02262}attP2  | Enhancer               |                                | CKB             |
| 41690  | Arl4       | FBgn0039889 | CG2219  | VDRC.41690             | Enhancer               |                                | ARL4D           |
| 54014  | Arl4       | FBgn0039889 | CG2219  | P{TRiP.HMJ21438}attP40 | Enhancer               |                                | ARL4D           |
| 17242  | Arp6       | FBgn0011741 | CG11678 | VDRC.17242             | Enhancer               |                                | ACTR6           |
| 108081 | Arp6       | FBgn0011741 | CG11678 | VDRC.108081            | Enhancer               |                                | ACTR6           |
| 36918  | Atg17      | FBgn0037363 | CG1347  | P{TRiP.HMS01611}attP2  | Enhancer               |                                | RB1CC1          |
| 24515  | Atg17      | FBgn0037363 | CG1347  | VDRC.24515             | Enhancer               |                                | RB1CC1          |
| 34901  | Atg9       | FBgn0034110 | CG3615  | P{TRiP.HMS01246}attP2  | Enhancer               |                                | ATG9A           |
| 28055  | Atg9       | FBgn0034110 | CG3615  | P{TRiP.JF02891}attP2   | Enhancer               |                                | ATG9A           |
| 17490  | Atu        | FBgn0019637 | CG1433  | VDRC.17490             | Suppressor             |                                | LEO1            |
| 106074 | Atu        | FBgn0019637 | CG1433  | VDRC.106074            | Suppressor             |                                | LEO1            |
| 42517  | bchs       | FBgn0043362 | CG14001 | P{TRiP.HMJ02083}attP40 | Enhancer               |                                | WDFY3           |
| 45028  | bchs       | FBgn0043362 | CG14001 | VDRC.45028             | Enhancer               |                                | WDFY3           |
| 39040  | Best3      | FBgn0036492 | CG12327 | P{TRiP.HMS01960}attP40 | Enhancer               |                                | BEST4           |
| 8372   | Best3      | FBgn0036492 | CG12327 | VDRC.8372              | Enhancer               |                                | BEST4           |
| 34902  | betaggt-II | FBgn0028970 | CG18627 | P{TRiP.HMS01247}attP2  | Enhancer               |                                | RABGGTB         |
| 50516  | betaggt-II | FBgn0028970 | CG18627 | P{TRiP.GLC01634}attP40 | Enhancer               |                                | RABGGTB         |
| 36636  | bgn        | FBgn0004581 | CG30170 | P{TRiP.GL00596}attP40  | Enhancer               |                                | YTHDC2          |
| 25590  | bgn        | FBgn0004581 | CG30170 | VDRC.25590             | Enhancer               |                                | YTHDC2          |
| 38248  | BHD        | FBgn0261111 | CG8616  | VDRC.38248             | Enhancer               |                                | FLCN            |
| 106087 | BHD        | FBgn0261111 | CG8616  | VDRC.106087            | Enhancer               |                                | FLCN            |

|        |         |             |         |                        |            |                                |         |
|--------|---------|-------------|---------|------------------------|------------|--------------------------------|---------|
| 37108  | BI-1    | FBgn0035871 | CG7188  | VDRC.37108             | Enhancer   |                                | TMBIM6  |
| 3235   | BI-1    | FBgn0035871 | CG7188  | VDRC.3235              | Enhancer   |                                | TMBIM6  |
| 34997  | BicC    | FBgn0000182 | CG4824  | P{TRiP.HMS01407}attP2  | Enhancer   |                                | BICC1   |
| 35631  | BicC    | FBgn0000182 | CG4824  | P{TRiP.GL00478}attP40  | Enhancer   |                                | BICC1   |
| 32977  | bsk     | FBgn0000229 | CG5680  | P{TRiP.HMS00777}attP2  | Suppressor |                                | MAPK9   |
| 31323  | bsk     | FBgn0000229 | CG5680  | P{TRiP.JF01275}attP2   | Suppressor |                                | MAPK9   |
| 42530  | btn     | FBgn0014949 | CG5264  | P{TRiP.HMJ02097}attP40 | Enhancer   |                                | MEOX2   |
| 50658  | btn     | FBgn0014949 | CG5264  | VDRC.50658             | Enhancer   |                                | MEOX2   |
| 106976 | Btnd    | FBgn0029848 | CG3599  | VDRC.106976            | Enhancer   |                                | BTD     |
| 16663  | Btnd    | FBgn0029848 | CG3599  | VDRC.16663             | Enhancer   |                                | BTD     |
| 60020  | Btnd    | FBgn0029848 | CG3599  | P{TRiP.HMC05012}attP2  | Enhancer   |                                | BTD     |
| 28337  | Cas     | FBgn0022213 | CG13281 | P{TRiP.JF02972}attP2   | Enhancer   |                                | CSE1L   |
| 2929   | Cas     | FBgn0022213 | CG13281 | VDRC.2929              | Enhancer   |                                | CSE1L   |
| 28978  | cathD   | FBgn0029093 | CG1548  | P{TRiP.HM05189}attP2   | Enhancer   | Loss of function enhancer, (2) | CTSD    |
| 36128  | cdc2c   | FBgn0004107 | CG10498 | P{TRiP.HMS01543}attP40 | Enhancer   |                                | CDK2    |
| 35267  | cdc2c   | FBgn0004107 | CG10498 | P{TRiP.GL00162}attP2   | Enhancer   |                                | CDK2    |
| 34668  | cg      | FBgn0000289 | CG8367  | P{TRiP.HMS01145}attP2  | Enhancer   |                                | REPIN1  |
| 29359  | cg      | FBgn0000289 | CG8367  | P{TRiP.JF02523}attP2   | Enhancer   |                                | REPIN1  |
| 32388  | CG10077 | FBgn0035720 | CG10077 | P{TRiP.HMS00380}attP2  | Suppressor |                                | DDX17   |
| 32981  | CG10077 | FBgn0035720 | CG10077 | P{TRiP.HMS00781}attP2  | Suppressor |                                | DDX17   |
| 108388 | CG10237 | FBgn0032783 | CG10237 | VDRC.108388            | Enhancer   | No second RNAi line            | TTPA    |
| 34350  | CG10253 | FBgn0033983 | CG10253 | P{TRiP.HMS01339}attP2  | Enhancer   |                                | AGPS    |
| 3321   | CG10253 | FBgn0033983 | CG10253 | VDRC.3321              | Enhancer   |                                | AGPS    |
| 45208  | CG10257 | FBgn0033985 | CG10257 | VDRC.45208             | Enhancer   |                                | FAIM    |
| 107744 | CG10257 | FBgn0033985 | CG10257 | VDRC.107744            | Enhancer   |                                | FAIM    |
| 7518   | CG10277 | FBgn0037442 | CG10277 | VDRC.7518              | Enhancer   | No second RNAi line            | RNF13   |
| 101168 | CG10283 | FBgn0032681 | CG10283 | VDRC.101168            | Enhancer   | No second RNAi line            | CCDC50  |
| 41907  | CG10376 | FBgn0032702 | CG10376 | P{TRiP.HMS02300}attP2  | Enhancer   |                                | PPM1F   |
| 35473  | CG10376 | FBgn0032702 | CG10376 | VDRC.35473             | Enhancer   |                                | PPM1F   |
| 39051  | CG10417 | FBgn0033021 | CG10417 | P{TRiP.HMS01971}attP2  | Enhancer   |                                | PPM1G   |
| 27259  | CG10417 | FBgn0033021 | CG10417 | VDRC.27259             | Enhancer   |                                | PPM1G   |
| 31585  | CG10641 | FBgn0032731 | CG10641 | P{TRiP.JF01160}attP2   | Suppressor |                                | EFHD1   |
| 31307  | CG10641 | FBgn0032731 | CG10641 | VDRC.31307             | Suppressor |                                | EFHD1   |
| 56028  | CG10730 | FBgn0032843 | CG10730 | P{TRiP.HMC04324}attP40 | Enhancer   |                                |         |
| 15778  | CG10730 | FBgn0032843 | CG10730 | VDRC.15778             | Enhancer   |                                |         |
| 34879  | CG10915 | FBgn0034308 | CG10915 | P{TRiP.HMS00199}attP2  | Suppressor |                                | FILIP1L |
| 31375  | CG10915 | FBgn0034308 | CG10915 | VDRC.31375             | Suppressor |                                | FILIP1L |

|        |         |             |         |                        |            |                                |          |
|--------|---------|-------------|---------|------------------------|------------|--------------------------------|----------|
| 42940  | CG11388 | FBgn0034959 | CG11388 | P{TRiP.HMS02633}attP40 | Enhancer   |                                | XXYLT1   |
| 3604   | CG11388 | FBgn0034959 | CG11388 | VDRC.3604              | Enhancer   |                                | XXYLT1   |
| 43180  | CG11537 | FBgn0035400 | CG11537 | P{TRiP.GL01523}attP2   | Enhancer   |                                | HIATL1   |
| 4118   | CG11537 | FBgn0035400 | CG11537 | VDRC.4118              | Enhancer   |                                | HIATL1   |
| 53325  | CG12203 | FBgn0031021 | CG12203 | P{TRiP.HMC03554}attP40 | Enhancer   |                                | NDUFS4   |
| 42983  | CG12203 | FBgn0031021 | CG12203 | VDRC.42983             | Enhancer   |                                | NDUFS4   |
| 26250  | CG12344 | FBgn0033558 | CG12344 | P{TRiP.JF02149}attP2   | Enhancer   |                                | GLRA2    |
| 37165  | CG12344 | FBgn0033558 | CG12344 | VDRC.37165             | Enhancer   |                                | GLRA2    |
| 43276  | CG12772 | FBgn0030055 | CG12772 | P{TRiP.GLC01466}attP2  | Enhancer   |                                | KIAA0226 |
| 46140  | CG12772 | FBgn0030055 | CG12772 | VDRC.46140             | Enhancer   |                                | KIAA0226 |
| 53323  | CG1315  | FBgn0026565 | CG1315  | P{TRiP.HMC03552}attP40 | Enhancer   |                                | ASS1     |
| 47097  | CG1315  | FBgn0026565 | CG1315  | VDRC.47097             | Enhancer   |                                | ASS1     |
| 53680  | CG13285 | FBgn0035611 | CG13285 | P{TRiP.HMJ21593}attP40 | Enhancer   |                                |          |
| 38170  | CG13285 | FBgn0035611 | CG13285 | VDRC.38170             | Enhancer   |                                |          |
| 41831  | CG13344 | FBgn0033884 | CG13344 | P{TRiP.GL01259}attP2   | Enhancer   |                                | RNF25    |
| 17141  | CG13344 | FBgn0033884 | CG13344 | VDRC.17141             | Enhancer   |                                | RNF25    |
| 28645  | CG13908 | FBgn0035178 | CG13908 | P{TRiP.JF03060}attP2   | Enhancer   | Loss of function enhancer, (3) | SLC2A3   |
| 50601  | CG1407  | FBgn0033474 | CG1407  | P{TRiP.GLC01723}attP2  | Enhancer   |                                | ZDHC2    |
| 50031  | CG1407  | FBgn0033474 | CG1407  | VDRC.50031             | Enhancer   |                                | ZDHC2    |
| 53303  | CG14077 | FBgn0036830 | CG14077 | P{TRiP.HMC03530}attP2  | Enhancer   |                                | COX6A1   |
| 7563   | CG14077 | FBgn0036830 | CG14077 | VDRC.7563              | Enhancer   |                                | COX6A1   |
| 44513  | CG14353 | FBgn0036771 | CG14353 | P{TRiP.HMC02903}attP2  | Suppressor |                                | PPP3R1   |
| 24860  | CG14353 | FBgn0036771 | CG14353 | VDRC.24860             | Suppressor |                                | PPP3R1   |
| 44521  | CG1440  | FBgn0030038 | CG1440  | P{TRiP.HMC02912}attP2  | Enhancer   | Loss of function enhancer, (4) | BLMH     |
| 55332  | CG15738 | FBgn0030352 | CG15738 | P{TRiP.HMC04019}attP40 | Enhancer   |                                |          |
| 103029 | CG15738 | FBgn0030352 | CG15738 | VDRC.103029            | Enhancer   |                                |          |
| 51486  | CG15743 | FBgn0030465 | CG15743 | P{TRiP.HMC03233}attP40 | Enhancer   |                                | IMPAD1   |
| 42685  | CG15743 | FBgn0030465 | CG15743 | VDRC.42685             | Enhancer   |                                | IMPAD1   |
| 55373  | CG1582  | FBgn0030246 | CG1582  | P{TRiP.HMC04061}attP40 | Enhancer   |                                | DHX36    |
| 19617  | CG1582  | FBgn0030246 | CG1582  | VDRC.19617             | Enhancer   |                                | DHX36    |
| 26007  | CG17139 | FBgn0260454 | CG17139 | P{TRiP.JF02032}attP2   | Enhancer   | No second RNAi line            | VDAC3    |
| 28023  | CG17843 | FBgn0038919 | CG17843 | P{TRiP.JF02857}attP2   | Enhancer   |                                | QSOX2    |
| 102838 | CG17843 | FBgn0038919 | CG17843 | VDRC.102838            | Enhancer   |                                | QSOX2    |
| 55323  | CG17896 | FBgn0023537 | CG17896 | P{TRiP.HMC04010}attP40 | Enhancer   |                                | ALDH6A1  |
| 5581   | CG17896 | FBgn0023537 | CG17896 | VDRC.5581              | Enhancer   |                                | ALDH6A1  |
| 28024  | CG1909  | FBgn0039911 | CG1909  | P{TRiP.JF02858}attP2   | Enhancer   |                                | RAPSN    |

|        |         |             |         |                        |          |                                                                                 |         |
|--------|---------|-------------|---------|------------------------|----------|---------------------------------------------------------------------------------|---------|
| 44538  | CG1909  | FBgn0039911 | CG1909  | P{TRiP.HMC02933}attP40 | Enhancer |                                                                                 | RAPSN   |
| 51900  | CG2107  | FBgn0035383 | CG2107  | P{TRiP.HMC03474}attP40 | Enhancer |                                                                                 | CPT2    |
| 62455  | CG2107  | FBgn0035383 | CG2107  | P{TRiP.HMJ23935}attP40 | Enhancer |                                                                                 | CPT2    |
| 51875  | CG2292  | FBgn0033479 | CG2292  | P{TRiP.HMC03449}attP40 | Enhancer |                                                                                 | PIGN    |
| 51500  | CG2292  | FBgn0033479 | CG2292  | VDRC.51500             | Enhancer |                                                                                 | PIGN    |
| 58108  | CG2444  | FBgn0030326 | CG2444  | P{TRiP.HMJ22044}attP40 | Enhancer | No second RNAi line                                                             |         |
| 57739  | CG3011  | FBgn0029823 | CG3011  | P{TRiP.HMC04929}attP40 | Enhancer | Loss of function enhancer of Dm tau, loss of function suppressor of Hs tau, (5) | SHMT1   |
| 34358  | CG31033 | FBgn0039705 | CG31033 | P{TRiP.HMS01347}attP2  | Enhancer |                                                                                 | ATG16L1 |
| 58244  | CG31033 | FBgn0039705 | CG31033 | P{TRiP.HMJ22265}attP40 | Enhancer |                                                                                 | ATG16L1 |
| 39064  | CG31148 | FBgn0051148 | CG31148 | P{TRiP.HMS01984}attP2  | Enhancer |                                                                                 | GBA     |
| 38379  | CG31148 | FBgn0051148 | CG31148 | P{TRiP.HMS01848}attP40 | Enhancer |                                                                                 | GBA     |
| 38524  | CG3121  | FBgn0034957 | CG3121  | P{TRiP.HMS01721}attP40 | Enhancer |                                                                                 | RSPH4A  |
| 25712  | CG3121  | FBgn0034957 | CG3121  | VDRC.25712             | Enhancer |                                                                                 | RSPH4A  |
| 53009  | CG31259 | FBgn0051259 | CG31259 | P{TRiP.HMJ21727}attP40 | Enhancer | Loss of function suppressor, (6)                                                | TMEM135 |
| 36106  | CG33253 | FBgn0030992 | CG33253 | P{TRiP.HMS00158}attP2  | Enhancer |                                                                                 | NPHS2   |
| 35685  | CG33253 | FBgn0030992 | CG33253 | VDRC.35685             | Enhancer |                                                                                 | NPHS2   |
| 55955  | CG33276 | FBgn0053276 | CG33276 | P{TRiP.HMC04244}attP40 | Enhancer |                                                                                 | URM1    |
| 48364  | CG33276 | FBgn0053276 | CG33276 | VDRC.48364             | Enhancer |                                                                                 | URM1    |
| 38267  | CG3338  | FBgn0031598 | CG3338  | P{TRiP.HMS01712}attP40 | Enhancer |                                                                                 | VPS53   |
| 21678  | CG3338  | FBgn0031598 | CG3338  | VDRC.21678             | Enhancer |                                                                                 | VPS53   |
| 38265  | CG34139 | FBgn0083975 | CG34139 | P{TRiP.HMS01710}attP40 | Enhancer |                                                                                 | NLGN4Y  |
| 58119  | CG34139 | FBgn0083975 | CG34139 | P{TRiP.HMJ22056}attP40 | Enhancer |                                                                                 | NLGN4Y  |
| 43279  | CG3446  | FBgn0029868 | CG3446  | P{TRiP.HMC02678}attP2  | Enhancer |                                                                                 | NDUFA13 |
| 42696  | CG3446  | FBgn0029868 | CG3446  | VDRC.42696             | Enhancer |                                                                                 | NDUFA13 |
| 53265  | CG3887  | FBgn0031670 | CG3887  | P{TRiP.GLC01826}attP2  | Enhancer |                                                                                 | SELT    |
| 105430 | CG3887  | FBgn0031670 | CG3887  | VDRC.105430            | Enhancer |                                                                                 | SELT    |
| 35332  | CG4041  | FBgn0029736 | CG4041  | P{TRiP.GL00239}attP2   | Enhancer |                                                                                 | TBCK    |
| 57223  | CG4041  | FBgn0029736 | CG4041  | P{TRiP.HMC04606}attP40 | Enhancer |                                                                                 | TBCK    |
| 37500  | CG42678 | FBgn0261564 | CG42678 | P{TRiP.HMS01642}attP40 | Enhancer | Loss of function enhancer, (4)                                                  | REEP2   |
| 21114  | CG42678 | FBgn0261564 | CG42678 | VDRC.21114             | Enhancer | Loss of function enhancer, (4)                                                  | REEP2   |
| 42836  | CG4390  | FBgn0038771 | CG4390  | P{TRiP.HMS02528}attP40 | Enhancer |                                                                                 | ESD     |
| 106327 | CG4390  | FBgn0038771 | CG4390  | VDRC.106327            | Enhancer |                                                                                 | ESD     |

|        |        |             |         |                        |            |                                |         |
|--------|--------|-------------|---------|------------------------|------------|--------------------------------|---------|
| 38943  | CG4848 | FBgn0037998 | CG4848  | P{TRiP.HMS01857}attP40 | Enhancer   |                                | COG1    |
| 40559  | CG4848 | FBgn0037998 | CG4848  | VDRC.40559             | Enhancer   |                                | COG1    |
| 32888  | CG5181 | FBgn0031909 | CG5181  | P{TRiP.HMS00676}attP2  | Enhancer   |                                | NABP2   |
| 59054  | CG5181 | FBgn0031909 | CG5181  | P{UAS-CG5181.RNAi}2    | Enhancer   |                                | NABP2   |
| 59053  | CG5181 | FBgn0031909 | CG5181  | P{UAS-CG5181.R}141B    | Suppressor |                                | NABP2   |
| 51436  | CG6271 | FBgn0039476 | CG6271  | P{TRiP.HMC03150}attP2  | Enhancer   |                                | LPL     |
| 50744  | CG6271 | FBgn0039476 | CG6271  | VDRC.50744             | Enhancer   |                                | LPL     |
| 43154  | CG6287 | FBgn0032350 | CG6287  | P{TRiP.GL01495}attP2   | Enhancer   |                                | PHGDH   |
| 52928  | CG6287 | FBgn0032350 | CG6287  | P{TRiP.HMC03669}attP40 | Enhancer   |                                | PHGDH   |
| 55192  | CG6488 | FBgn0032361 | CG6488  | P{TRiP.HMC03886}attP40 | Enhancer   |                                | COG8    |
| 104383 | CG6488 | FBgn0032361 | CG6488  | VDRC.104383            | Enhancer   |                                | COG8    |
| 28751  | CG6697 | FBgn0027526 | CG6697  | P{TRiP.JF03179}attP2   | Enhancer   |                                | UBLCP1  |
| 35610  | CG6697 | FBgn0027526 | CG6697  | P{TRiP.GL00450}attP2   | Enhancer   |                                | UBLCP1  |
| 55941  | CG6788 | FBgn0030880 | CG6788  | P{TRiP.HMC04229}attP40 | Enhancer   |                                | ANGPTL3 |
| 42912  | CG6788 | FBgn0030880 | CG6788  | VDRC.42912             | Enhancer   |                                | ANGPTL3 |
| 51896  | CG7049 | FBgn0035102 | CG7049  | P{TRiP.HMC03470}attP40 | Enhancer   |                                | SUMF1   |
| 50559  | CG7049 | FBgn0035102 | CG7049  | P{TRiP.GLC01679}attP2  | Enhancer   |                                | SUMF1   |
| 42605  | CG7146 | FBgn0038593 | CG7146  | P{TRiP.HMS02438}attP40 | Enhancer   |                                | VPS39   |
| 46200  | CG7146 | FBgn0038593 | CG7146  | VDRC.46200             | Enhancer   |                                | VPS39   |
| 32343  | CG8765 | FBgn0036900 | CG8765  | P{TRiP.HMS00334}attP2  | Suppressor |                                | MSANTD2 |
| 29447  | CG8765 | FBgn0036900 | CG8765  | P{TRiP.JF03383}attP2   | Suppressor |                                | MSANTD2 |
| 29515  | CG8852 | FBgn0031548 | CG8852  | P{TRiP.HM05192}attP2   | Suppressor | No second RNAi line            |         |
| 39031  | CG8916 | FBgn0030707 | CG8916  | P{TRiP.HMS01950}attP40 | Suppressor |                                | GABRA5  |
| 25854  | CG8916 | FBgn0030707 | CG8916  | P{TRiP.JF01875}attP2   | Suppressor |                                | GABRA5  |
| 34973  | CG8993 | FBgn0035334 | CG8993  | P{TRiP.HMS01042}attP2  | Enhancer   |                                | TXN2    |
| 41126  | CG8993 | FBgn0035334 | CG8993  | VDRC.41126             | Enhancer   |                                | TXN2    |
| 51908  | CG9706 | FBgn0036662 | CG9706  | P{TRiP.HMC03483}attP40 | Enhancer   |                                | SLC33A1 |
| 49346  | CG9706 | FBgn0036662 | CG9706  | VDRC.49346             | Enhancer   |                                | SLC33A1 |
| 28523  | CG9977 | FBgn0035371 | CG9977  | P{TRiP.HM05009}attP2   | Enhancer   |                                | AHCYL1  |
| 57869  | CG9977 | FBgn0035371 | CG9977  | P{TRiP.HMC04803}attP40 | Enhancer   |                                | AHCYL1  |
| 35755  | cher   | FBgn0014141 | CG3937  | P{TRiP.HMS01501}attP2  | Suppressor | Gain of function enhancer, (7) | FLNC    |
| 51809  | Cpr    | FBgn0015623 | CG11567 | P{TRiP.HMC03369}attP40 | Enhancer   |                                | POR     |
| 46715  | Cpr    | FBgn0015623 | CG11567 | VDRC.46715             | Enhancer   |                                | POR     |
| 41991  | CSN6   | FBgn0028837 | CG6932  | P{TRiP.HMS02392}attP40 | Enhancer   |                                | COPS6   |
| 36073  | CSN6   | FBgn0028837 | CG6932  | P{TRiP.GL00492}attP2   | Enhancer   |                                | COPS6   |
| 5804   | CtrlB  | FBgn0062412 | CG7459  | VDRC.5804              | Enhancer   |                                | SLC31A2 |
| 10263  | CtrlC  | FBgn0062411 | CG15551 | VDRC.21045             | Enhancer   |                                | SLC31A1 |

|        |          |             |         |                        |            |                                  |        |
|--------|----------|-------------|---------|------------------------|------------|----------------------------------|--------|
| 54023  | Cyp4ac3  | FBgn0031695 | CG14031 | P{TRiP.HMJ21449}attP40 | Enhancer   |                                  | CYP4V2 |
| 44823  | Cypl     | FBgn0035141 | CG13892 | VDRC.44823             | Enhancer   |                                  | PPIL1  |
| 104316 | Cypl     | FBgn0035141 | CG13892 | VDRC.104316            | Enhancer   |                                  | PPIL1  |
| 53950  | Cyt-b5   | FBgn0264294 | CG2140  | P{TRiP.HMJ21314}attP40 | Enhancer   | Gain of function suppressor, (8) | CYB5B  |
| 42472  | Cyt-b5-r | FBgn0000406 | CG13279 | VDRC.42472             | Enhancer   |                                  | FADS1  |
| 17128  | Cyt-c-d  | FBgn0086907 | CG13263 | VDRC.17128             | Enhancer   |                                  | CYCS   |
| 101079 | Cyt-c-d  | FBgn0086907 | CG13263 | VDRC.101079            | Enhancer   |                                  | CYCS   |
| 33019  | Cyt-c-p  | FBgn0000409 | CG17903 | VDRC.33019             | Enhancer   |                                  | CYCS   |
| 39035  | dlg1     | FBgn0001624 | CG1725  | P{TRiP.HMS01954}attP40 | Enhancer   | Loss of function enhancer, (3)   | DLG2   |
| 35286  | dlg1     | FBgn0001624 | CG1725  | P{TRiP.GL00188}attP2   | Enhancer   | Loss of function enhancer, (3)   | DLG2   |
| 38253  | dlt      | FBgn0024510 | CG32315 | P{TRiP.HMS01697}attP40 | Enhancer   |                                  | CDAN1  |
| 42866  | dlt      | FBgn0024510 | CG32315 | P{TRiP.HMS02559}attP40 | Enhancer   |                                  | CDAN1  |
| 55239  | Dop1R1   | FBgn0011582 | CG9652  | P{TRiP.HMC02344}attP2  | Enhancer   |                                  | DRD5   |
| 31765  | Dop1R1   | FBgn0011582 | CG9652  | P{TRiP.HM04077}attP2   | Enhancer   |                                  | DRD5   |
| f02676 | Dop1R1   | FBgn0011582 | CG9652  | PBac{WH}Dop1R1-f02676  | Enhancer   |                                  | DRD5   |
| 28945  | dysc     | FBgn0264006 | CG43749 | P{TRiP.HM05156}attP2   | Enhancer   |                                  | DFNB31 |
| 14082  | dysc     | FBgn0264006 | CG43749 | VDRC.14082             | Enhancer   |                                  | DFNB31 |
| 55276  | egr      | FBgn0033483 | CG12919 | P{TRiP.HMC03963}attP40 | Suppressor |                                  | EDA    |
| 58993  | egr      | FBgn0033483 | CG12919 | P{UAS-eiger.IR}3       | Suppressor |                                  | EDA    |
| 55228  | EndoG    | FBgn0033690 | CG8862  | P{TRiP.GLC01845}attP2  | Enhancer   |                                  | ENDOG  |
| 38084  | EndoG    | FBgn0033690 | CG8862  | VDRC.38084             | Enhancer   |                                  | ENDOG  |
| 33935  | ERp60    | FBgn0033663 | CG8983  | P{TRiP.HMS00885}attP2  | Enhancer   |                                  | PDIA4  |
| 51674  | ERp60    | FBgn0033663 | CG8983  | VDRC.51674             | Enhancer   |                                  | PDIA4  |
| 55731  | etaTry   | FBgn0011554 | CG12386 | P{TRiP.HMC03744}attP40 | Enhancer   |                                  | CELA3B |
| 33233  | etaTry   | FBgn0011554 | CG12386 | VDRC.33233             | Enhancer   |                                  | CELA3B |
| 51796  | Faa      | FBgn0016013 | CG14993 | P{TRiP.HMC03352}attP40 | Enhancer   |                                  | FAH    |
| 43031  | Faa      | FBgn0016013 | CG14993 | VDRC.43031             | Enhancer   |                                  | FAH    |
| 41854  | Fas1     | FBgn0285925 | CG6588  | P{TRiP.GL01282}attP2   | Enhancer   |                                  | POSTN  |
| 42887  | Fas1     | FBgn0285925 | CG6588  | P{TRiP.HMS02580}attP40 | Enhancer   |                                  | POSTN  |
| 44428  | Fem-1    | FBgn0034542 | CG9025  | VDRC.44428             | Enhancer   | Loss of function enhancer, (7)   | FEM1B  |
| 28926  | feo      | FBgn0030241 | CG11207 | P{TRiP.HM05137}attP2   | Enhancer   |                                  | PRC1   |
| 35467  | feo      | FBgn0030241 | CG11207 | P{TRiP.GL00393}attP2   | Enhancer   |                                  | PRC1   |
| 25966  | Fit1     | FBgn0035498 | CG14991 | P{TRiP.JF01986}attP2   | Enhancer   | Loss of function                 | FERMT3 |

|         |          |             |         |                        |            |                                                                                    |          |
|---------|----------|-------------|---------|------------------------|------------|------------------------------------------------------------------------------------|----------|
|         |          |             |         |                        |            | enhancer,<br>(9)                                                                   |          |
| 44536   | Fit1     | FBgn0035498 | CG14991 | P{TRiP.HMC02930}attP40 | Enhancer   | Loss of<br>function<br>enhancer,<br>(9)                                            | FERMT3   |
| 41941   | Fit2     | FBgn0036688 | CG7729  | P{TRiP.HMS02338}attP40 | Enhancer   | Loss of<br>function<br>enhancer,<br>gain of<br>function<br>suppressor,<br>(9)      | FERMT3   |
| 27578   | fl(2)d   | FBgn0000662 | CG6315  | VDRC.27578             | Enhancer   |                                                                                    | WTAP     |
| 55674   | fl(2)d   | FBgn0000662 | CG6315  | P{TRiP.HMC03833}attP40 | Enhancer   |                                                                                    | WTAP     |
| F001352 | fl(2)d   | FBgn0000662 | CG6315  | UAS-fl(2)d.ORF}ZH-86Fb | Suppressor |                                                                                    | WTAP     |
| 27567   | Fs(2)Ket | FBgn0262743 | CG2637  | P{TRiP.JF02721}attP2   | Enhancer   | Fs(2)Ket-<br>EY06666<br>suppressor,<br>(10)                                        | KPNB1    |
| 41845   | Fs(2)Ket | FBgn0262743 | CG2637  | P{TRiP.GL01273}attP2   | Enhancer   | Fs(2)Ket-<br>EY06666<br>suppressor,<br>(10)                                        | KPNB1    |
| 108737  | Gclm     | FBgn0046114 | CG4919  | VDRC.108737            | Enhancer   |                                                                                    | GCLM     |
| 58075   | Gclm     | FBgn0046114 | CG4919  | P{TRiP.HMJ21967}attP40 | Enhancer   |                                                                                    | GCLM     |
| 51473   | Gdh      | FBgn0001098 | CG5320  | P{TRiP.HMC03217}attP40 | Enhancer   |                                                                                    | GLUD1    |
| 53255   | Gdh      | FBgn0001098 | CG5320  | P{TRiP.GLC01815}attP2  | Enhancer   |                                                                                    | GLUD1    |
| 27309   | Gdi      | FBgn0004868 | CG4422  | P{TRiP.JF02617}attP2   | Enhancer   | Loss of<br>function<br>enhancer,<br>(6)                                            | GDI2     |
| 34737   | gig      | FBgn0005198 | CG6975  | P{TRiP.HMS01217}attP2  | Suppressor | Loss of<br>function<br>suppressor,<br>(11)                                         | TSC2     |
| 49301   | gkt      | FBgn0260817 | CG8825  | VDRC.49301             | Enhancer   |                                                                                    | TDP1     |
| 109757  | gkt      | FBgn0260817 | CG8825  | VDRC.109757            | Enhancer   |                                                                                    | TDP1     |
| 36668   | glob1    | FBgn0027657 | CG9734  | P{TRiP.HMS01556}attP40 | Enhancer   |                                                                                    | CYGB     |
| 36693   | glob2    | FBgn0250846 | CG15180 | P{TRiP.HMS01582}attP2  | Enhancer   |                                                                                    | HBA1     |
| 50956   | GlyS     | FBgn0266064 | CG6904  | P{TRiP.HMJ21058}attP40 | Enhancer   |                                                                                    | GYS1     |
| 34930   | GlyS     | FBgn0266064 | CG6904  | P{TRiP.HMS01279}attP2  | Enhancer   |                                                                                    | GYS1     |
| 53966   | GM130    | FBgn0034697 | CG11061 | P{TRIP.HMJ21349}attP40 | Enhancer   |                                                                                    | GOLGA6L4 |
| 38441   | GM130    | FBgn0034697 | CG11061 | VDRC.38441             | Enhancer   |                                                                                    | GOLGA6L4 |
| 55150   | GSS      | FBgn0030882 | CG6835  | P{TRiP.HMC03776}attP40 | Enhancer   | No second<br>RNAi line                                                             | GSS      |
| 34525   | gwl      | FBgn0260399 | CG7719  | P{TRiP.HMS00834}attP2  | Enhancer   |                                                                                    | MASTL    |
| 35212   | gwl      | FBgn0260399 | CG7719  | P{TRiP.GL00091}attP2   | Enhancer   |                                                                                    | MASTL    |
| 28710   | hep      | FBgn0010303 | CG4353  | P{TRiP.JF03137}attP2   | Suppressor | Gain of<br>function<br>enhancer,<br>(7); loss of<br>function<br>suppressor,<br>(6) | MAP2K7   |



|        |         |             |         |                                      |            |                                   |         |
|--------|---------|-------------|---------|--------------------------------------|------------|-----------------------------------|---------|
| 54458  | HIP     | FBgn0260484 | CG32789 | P{TRiP.HMS03718}attP2                | Enhancer   |                                   | ST13    |
| 34018  | HIP-R   | FBgn0029676 | CG2947  | P{TRiP.HMS00988}attP2                | Enhancer   |                                   | ST13    |
| 42658  | Hs6st   | FBgn0038755 | CG4451  | VDRC.42658                           | Enhancer   | Loss of function enhancer, (3)    | HS6ST2  |
| 38283  | hts     | FBgn0263391 | CG43443 | P{TRiP.HMS01736}attP40               | Enhancer   |                                   | ADD1    |
| 35421  | hts     | FBgn0263391 | CG9995  | P{TRiP.GL00344}attP2                 | Enhancer   |                                   | ADD1    |
| 44050  | l-2     | FBgn0028429 | CG10574 | P{TRiP.HMS02767}attP40               | Enhancer   |                                   | PPP1R2  |
| 24101  | l-2     | FBgn0028429 | CG10574 | P{UAS-l-2.HA}G; P{UAS-Pp1-87B.HA}H-1 | Suppressor |                                   | PPP1R2  |
| 55935  | ldgf2   | FBgn0020415 | CG4475  | P{TRiP.HMC04223}attP40               | Enhancer   | No second RNAi line               |         |
| 38444  | inaE    | FBgn0261244 | CG33174 | VDRC.38444                           | Enhancer   |                                   | DAGLB   |
| 103713 | inaE    | FBgn0261244 | CG33174 | VDRC.103713                          | Enhancer   |                                   | DAGLB   |
| 31594  | InR     | FBgn0013984 | CG18402 | P{TRiP.JF01183}attP2                 | Enhancer   |                                   | IGF1R   |
| 35251  | InR     | FBgn0013984 | CG18402 | P{TRiP.GL00139}attP2                 | Enhancer   |                                   | IGF1R   |
| 35186  | ird5    | FBgn0024222 | CG4201  | P{TRiP.GL00058}attP2                 | Enhancer   |                                   | IKBKB   |
| 57751  | ird5    | FBgn0024222 | CG4201  | P{HMC04944}attP40                    | Enhancer   |                                   | IKBKB   |
| 40924  | koi     | FBgn0265003 | CG44154 | P{TRiP.HMS02172}attP40               | Enhancer   | Loss of function enhancer, (12)   | SUN2    |
| 31584  | kon     | FBgn0032683 | CG10275 | P{TRiP.JF01159}attP2                 | Suppressor |                                   | CSPG4   |
| 37283  | kon     | FBgn0032683 | CG10275 | VDRC.37283                           | Suppressor |                                   | CSPG4   |
| 41724  | l(2)efl | FBgn0011296 | CG4533  | P{TRiP.HMS02290}attP2                | Enhancer   |                                   | CRYAB   |
| 51816  | l(2)efl | FBgn0011296 | CG4533  | P{TRiP.HMC03387}attP40               | Enhancer   |                                   | CRYAB   |
| 38989  | l(2)gl  | FBgn0002121 | CG2671  | P{TRiP.HMS01905}attP40               | Enhancer   |                                   | LLGL2   |
| 38206  | l(2)gl  | FBgn0002121 | CG2671  | P{TRiP.GL00645}attP40                | Enhancer   |                                   | LLGL2   |
| 37506  | lwr     | FBgn0010602 | CG3018  | P{TRiP.HMS01648}attP40               | Enhancer   |                                   | UBE2I   |
| 37481  | lwr     | FBgn0010602 | CG3018  | P{TRiP.GL00624}attP40                | Enhancer   |                                   | UBE2I   |
| 50644  | mab-21  | FBgn0029003 | CG4746  | P{TRiP.HMC03044}attP2                | Enhancer   |                                   | MAB21L1 |
| 100700 | mab-21  | FBgn0029003 | CG4746  | VDRC.100700                          | Enhancer   |                                   | MAB21L1 |
| 44430  | mad2    | FBgn0035640 | CG17498 | P{TRiP.GLC01381}attP2                | Enhancer   |                                   | MAD2L1  |
| 47918  | mad2    | FBgn0035640 | CG17498 | VDRC.47918                           | Enhancer   |                                   | MAD2L1  |
| 55313  | mei-9   | FBgn0002707 | CG3697  | P{TRiP.HMC04000}attP40               | Enhancer   | Gain of function suppressor, (10) | ERCC4   |
| 42005  | Menl-1  | FBgn0029154 | CG7964  | P{TRiP.HMS02406}attP40               | Enhancer   |                                   | ME3     |
| 50645  | Menl-2  | FBgn0029154 | CG7964  | VDRC.50645                           | Enhancer   |                                   | ME3     |
| 32462  | mip130  | FBgn0023509 | CG3480  | P{TRiP.HMS00462}attP2                | Enhancer   |                                   | LIN9    |
| 26205  | mip130  | FBgn0023509 | CG3480  | VDRC.26205                           | Enhancer   |                                   | LIN9    |
| 39028  | mre11   | FBgn0020270 | CG16928 | P{TRiP.HMS01947}attP40               | Enhancer   |                                   | MRE11A  |
| 50628  | mre11   | FBgn0020270 | CG16928 | TRiP.HMC02995}attP2                  | Enhancer   |                                   | MRE11A  |
| 28054  | mtTFB1  | FBgn0261381 | CG42631 | P{TRiP.JF02890}attP2                 | Suppressor |                                   | TFB1M   |

|       |         |             |         |                        |            |                                                             |           |
|-------|---------|-------------|---------|------------------------|------------|-------------------------------------------------------------|-----------|
| 27055 | mtTFB2  | FBgn0037778 | CG3910  | P{TRiP.JF02381}attP2   | Suppressor |                                                             | TFB1M     |
| 35044 | mud     | FBgn0002873 | CG12047 | P{TRiP.HMS01458}attP2  | Enhancer   |                                                             |           |
| 38190 | mud     | FBgn0002873 | CG12047 | P{TRiP.GL00629}attP40  | Enhancer   |                                                             |           |
| 37504 | Npc1a   | FBgn0024320 | CG5722  | P{TRiP.HMS01646}attP40 | Suppressor |                                                             | NPC1L1    |
| 38296 | Npc1b   | FBgn0261675 | CG12092 | P{TRiP.HMS01757}attP40 | Suppressor |                                                             | NPC1L1    |
| 38954 | nudE    | FBgn0036059 | CG8104  | P{TRiP.HMS01868}attP40 | Suppressor |                                                             | NDEL1     |
| 41860 | nudE    | FBgn0036059 | CG8104  | P{TRiP.GL01288}attP2   | Suppressor |                                                             | NDEL1     |
| 27573 | nuf     | FBgn0013718 | CG33991 | P{TRiP.JF02728}attP2   | Suppressor |                                                             | RAB11FIP4 |
| 44035 | nuf     | FBgn0013718 | CG33991 | TRiP.HMS02751}attP40   | Suppressor |                                                             | RAB11FIP4 |
| 38357 | Nup44A  | FBgn0033247 | CG8722  | P{TRiP.HMS01825}attP40 | Suppressor |                                                             | SEH1L     |
| 32942 | Nup44A  | FBgn0033247 | CG8722  | P{TRiP.HMS00736}attP2  | Suppressor |                                                             | SEH1L     |
| 57583 | Orct2   | FBgn0086365 | CG13610 | P{TRiP.HMC04670}attP40 | Enhancer   | Loss of function enhancer, gain of function suppressor, (7) | SLC22A4   |
| 51898 | Oseg4   | FBgn0035264 | CG2069  | P{TRiP.HMC03472}attP40 | Enhancer   |                                                             | WDR35     |
| 43380 | Oseg4   | FBgn0035264 | CG2069  | VDRC.43380             | Enhancer   |                                                             | WDR35     |
| 29405 | p38b    | FBgn0024846 | CG7393  | P{TRiP.JF03341}attP2   | Suppressor |                                                             | MAPK9     |
| 35252 | p38b    | FBgn0024846 | CG7393  | P{TRiP.GL00140}attP2   | Suppressor |                                                             | MAPK9     |
| 41720 | p53     | FBgn0039044 | CG33336 | P{TRiP.HMS02286}attP2  | Enhancer   | Loss of function enhancer, (1)                              | TP53      |
| 31188 | Parg    | FBgn0023216 | CG2864  | P{TRiP.JF01703}attP2   | Suppressor |                                                             | PARG      |
| 23962 | Parg    | FBgn0023216 | CG2864  | VDRC.23962             | Suppressor |                                                             | PARG      |
| 50702 | Pex19   | FBgn0032407 | CG5325  | P{TRiP.HMC03104}attP2  | Enhancer   |                                                             | PEX19     |
| 22064 | Pex19   | FBgn0032407 | CG5325  | VDRC.22064             | Enhancer   |                                                             | PEX19     |
| 31190 | ph-d    | FBgn0004860 | CG3895  | P{TRiP.JF01705}attP2   | Suppressor | No second RNAi line                                         | PHC2      |
| 31243 | Pka-C2  | FBgn0000274 | CG12066 | P{TRiP.JF01756}attP2   | Suppressor | Gain of function enhancer, (7)                              | PKA       |
| 31656 | Pka-C2  | FBgn0000274 | CG12066 | P{TRiP.JF01448}attP2   | Suppressor | Gain of function enhancer, (7)                              | PKA       |
| 30485 | PNUTS   | FBgn0053526 | CG33526 | P{TRiP.HM05223}attP2   | Suppressor |                                                             | PPP1R10   |
| 25787 | PNUTS   | FBgn0053526 | CG33526 | VDRC.25787             | Suppressor |                                                             | PPP1R10   |
| 51705 | pog     | FBgn0051660 | CG31660 | P{TRiP.HMC03192}attP40 | Enhancer   |                                                             | GPR158    |
| 43135 | pog     | FBgn0051660 | CG31660 | P{TRiP.GL01473}attP2   | Enhancer   |                                                             | GPR158    |
| 32465 | Pp1-13C | FBgn0003132 | CG9156  | P{TRiP.HMS00465}attP2  | Suppressor |                                                             | PPP1CC    |
| 23701 | Pp1-13C | FBgn0003132 | CG9156  | P{UAS-Pp1-13C.HA}3     | Enhancer   |                                                             | PPP1CC    |
| 25952 | Ppt1    | FBgn0030057 | CG12108 | P{TRiP.JF01972}attP2   | Enhancer   |                                                             | PPT1      |
|       | Ppt1    | FBgn0030057 | CG12108 | S77F                   | Enhancer   |                                                             | PPT1      |

|       |               |             |         |                          |            |                                                                |         |
|-------|---------------|-------------|---------|--------------------------|------------|----------------------------------------------------------------|---------|
| 34392 | pucl          | FBgn0243512 | CG7850  | P{TRiP.HMS01386}attP2    | Enhancer   |                                                                | DUSP10  |
|       | pucl          | FBgn0243512 | CG7850  | P{A92}pucl[E69]          | Enhancer   |                                                                | DUSP10  |
| 34670 | Rab1          | FBgn0016700 | CG3320  | P{TRiP.HMS01148}attP2    | Enhancer   |                                                                | RAB1A   |
| 27299 | Rab1          | FBgn0016700 | CG3320  | P{TRiP.JF02609}attP2     | Enhancer   |                                                                | RAB1A   |
| 24104 | Rab1          | FBgn0016700 | CG3320  | P{UAST-YFP.Rab1}Mes2[01] | Suppressor |                                                                | RAB1A   |
| 31177 | Rab26         | FBgn0086913 | CG34410 | P{TRiP.JF01684}attP2     | Suppressor | Gain of function suppressor and loss of function enhancer, (1) | RAB26   |
| 33966 | Rheb          | FBgn0041191 | CG1081  | P{TRiP.HMS00923}attP2    | Suppressor | Loss of function suppressor, (2)                               | RHEB    |
| 34829 | Rm62          | FBgn0003261 | CG10279 | P{TRiP.HMS00144}attP2    | Suppressor |                                                                | DDX17   |
| 58150 | Rm62          | FBgn0003261 | CG10279 | P{TRiP.HMJ22101}attP40   | Suppressor |                                                                | DDX17   |
| 32472 | Rox8          | FBgn0005649 | CG5422  | P{TRiP.HMS00472}attP2    | Enhancer   |                                                                | TIA1    |
| 28035 | Rox8          | FBgn0005649 | CG5422  | P{TRiP.JF02870}attP2     | Enhancer   |                                                                | TIA1    |
| 42572 | S6k           | FBgn0015806 | CG10539 | P{TRiP.HMJ02231}attP40   | Suppressor |                                                                | RPS6KB1 |
| 34894 | Sara          | FBgn0026369 | CG15667 | P{TRiP.HMS01239}attP2    | Suppressor |                                                                | ZFYVE16 |
| 23709 | Sara          | FBgn0026369 | CG15667 | P{UAS-Sara.MYC.His6}BC   | Enhancer   |                                                                | ZFYVE16 |
| 31119 | Septin 4      | FBgn0259923 | CG9699  | P{TRiP.JF01592}attP2     | Enhancer   |                                                                | SEPT5   |
| 41859 | Septin 4      | FBgn0259923 | CG9699  | P{TRiP.GL01287}attP2     | Enhancer   |                                                                | SEPT5   |
| 32367 | SF2           | FBgn0283477 | CG6987  | P{TRiP.HMS00358}attP2    | Suppressor |                                                                | SRSF9   |
| 29522 | SF2           | FBgn0283477 | CG6987  | P{TRiP.HM05199}attP2     | Suppressor |                                                                | SRSF9   |
| 34689 | shn           | FBgn0003396 | CG7734  | P{TRiP.HMS01167}attP2    | Suppressor |                                                                | HIVEP2  |
| 3226  | shn           | FBgn0003396 | CG7734  | VDRC.3226                | Suppressor |                                                                | HIVEP2  |
| 40942 | Shroom        | FBgn0085408 | CG34379 | P{TRiP.HMS02190}attP2    | Enhancer   |                                                                | SUMO1   |
| 36125 | smt3          | FBgn0026170 | CG4494  | P{TRiP.HMS01540}attP2    | Enhancer   |                                                                | SUMO1   |
| 28034 | smt3          | FBgn0026170 | CG4494  | P{TRiP.JF02869}attP2     | Enhancer   |                                                                | SUMO1   |
| 28719 | Snap24        | FBgn0028401 | CG9474  | P{TRiP.JF03146}attP2     | Enhancer   |                                                                | SNAP23  |
| 48033 | Snap24        | FBgn0028401 | CG9474  | VDRC.48033               | Enhancer   |                                                                | SNAP23  |
| 55689 | snRNA:U4:38AB | FBgn0003931 | CR32879 | P{TRiP.HMC03903}attP40   | Suppressor | No second RNAi line                                            |         |
| 55676 | snRNA:U5:63BC | FBgn0003938 | CR32908 | P{TRiP.HMC03840}attP40   | Suppressor | No second RNAi line                                            |         |
| 38992 | Snx16         | FBgn0034265 | CG6410  | P{TRiP.HMS01908}attP40   | Enhancer   |                                                                | SNX16   |
| 45572 | Snx16         | FBgn0034265 | CG6410  | VDRC.45572               | Enhancer   |                                                                | SNX16   |
| 34556 | Sodh-1        | FBgn0024289 | CG1982  | P{TRiP.HMS01028}attP2    | Enhancer   |                                                                | SORD    |
| 43997 | SP1029        | FBgn0263236 | CG11956 | P{TRiP.HMS02711}attP2    | Enhancer   |                                                                | ERAP1   |
| 3335  | SP1029        | FBgn0263236 | CG11956 | VDRC.3335                | Enhancer   |                                                                | ERAP1   |
| 43158 | spn-B         | FBgn0003480 | CG3325  | P{TRiP.GL01500}attP2     | Enhancer   |                                                                | XRCC3   |
| 55403 | spn-B         | FBgn0003480 | CG3325  | P{TRiP.HMC04091}attP40   | Enhancer   |                                                                | XRCC3   |

|       |            |             |         |                        |            |                                                                |        |
|-------|------------|-------------|---------|------------------------|------------|----------------------------------------------------------------|--------|
| 35574 | squ        | FBgn0002652 | CG4711  | P{TRiP.GL00116}attP2   | Enhancer   |                                                                |        |
| 47103 | squ        | FBgn0002652 | CG4711  | VDRC.47103             | Enhancer   |                                                                |        |
| 36578 | SRm160     | FBgn0036340 | CG11274 | P{TRiP.GL00538}attP2   | Enhancer   |                                                                | SRRM1  |
| 55205 | SRm160     | FBgn0036340 | CG11274 | P{TRiP.HMC03920}attP40 | Enhancer   |                                                                | SRRM1  |
| 41928 | stg1       | FBgn0064123 | CG33670 | P{TRiP.HMS02325}attP40 | Enhancer   | No second RNAi line                                            | CACNG7 |
| 33400 | Su(var)205 | FBgn0003607 | CG8409  | P{TRiP.HMS00278}attP2  | Enhancer   | Loss of function enhancer, (13)                                | CBX1   |
| 55175 | su(w[a])   | FBgn0003638 | CG3019  | P{TRiP.HMC03856}attP40 | Enhancer   | No second RNAi line                                            | SFSWAP |
| 39067 | Syb        | FBgn0003660 | CG12210 | P{TRiP.HMS01987}attP40 | Enhancer   |                                                                | VAMP1  |
| 44014 | Syb        | FBgn0003660 | CG12210 | P{TRiP.HMS02728}attP40 | Enhancer   |                                                                | VAMP1  |
| 41882 | Sybeta     | FBgn0261090 | CG42333 | P{TRiP.HMS02296}attP2  | Enhancer   | Loss of function enhancer, (1)                                 | SYT6   |
| 34881 | Tao        | FBgn0031030 | CG14217 | P{TRiP.HMS01226}attP2  | Suppressor | Gain of function enhancer, (7)                                 | TAOK1  |
| 28543 | Toll-4     | FBgn0032095 | CG18241 | P{TRiP.HM05029}attP2   | Enhancer   |                                                                | TLR10  |
| 47966 | Toll-4     | FBgn0032095 | CG18241 | VDRC.47966             | Enhancer   |                                                                | TLR10  |
| 34853 | Toll-9     | FBgn0036978 | CG5528  | P{TRiP.HMS00171}attP2  | Enhancer   |                                                                | TLR1   |
| 30535 | Toll-9     | FBgn0036978 | CG5528  | P{TRiP.HM05227}attP2   | Enhancer   |                                                                | TLR1   |
| 51407 | TotC       | FBgn0044812 | CG31508 | P{TRiP.GLC01771}attP40 | Enhancer   |                                                                |        |
| 14420 | TotC       | FBgn0044812 | CG31508 | VDRC.14420             | Enhancer   |                                                                |        |
| 31637 | tou        | FBgn0033636 | CG10897 | P{TRiP.JF01424}attP2   | Enhancer   |                                                                | BAZ2B  |
| 34019 | Trx-2      | FBgn0040070 | CG31884 | P{TRiP.HMS00989}attP2  | Enhancer   |                                                                | TXN    |
| 33721 | Trx-2      | FBgn0040070 | CG31884 | P{TRiP.HMS00603}attP2  | Enhancer   |                                                                | TXN    |
| 39042 | Tsp29Fb    | FBgn0032075 | CG9496  | P{TRiP.HMS01962}attP40 | Suppressor | No second RNAi line                                            | TSPAN7 |
| 28951 | unc-104    | FBgn0267002 | CG8566  | P{TRiP.HM05162}attP2   | Enhancer   |                                                                | KIF1A  |
| 43264 | unc-104    | FBgn0267002 | CG8566  | P{TRiP.GLC01453}attP2  | Enhancer   |                                                                | KIF1A  |
| 43253 | Use1       | FBgn0035965 | CG14181 | P{TRiP.GLC01442}attP2  | Enhancer   |                                                                | USE1   |
| 42549 | Use1       | FBgn0035965 | CG14181 | VDRC.42549             | Enhancer   |                                                                | USE1   |
| 32430 | wun        | FBgn0016078 | CG8804  | P{TRiP.HMS00425}attP2  | Enhancer   | Gain of function suppressor and loss of function enhancer, (7) |        |
| 36755 | Xbp1       | FBgn0021872 | CG9415  | P{TRiP.HMS03015}attP2  | Enhancer   | Loss of function enhancer, (14)                                | XBP1   |
| 32894 | XNP        | FBgn0039338 | CG4548  | P{TRiP.HMS00683}attP2  | Enhancer   |                                                                | ATRX   |
| 29444 | XNP        | FBgn0039338 | CG4548  | P{TRiP.JF03380}attP2   | Enhancer   |                                                                | ATRX   |
| 57809 | yellow-g   | FBgn0041709 | CG5717  | P{TRiP.HMJ21817}attP40 | Enhancer   |                                                                |        |

|       |           |             |         |                        |          |  |         |
|-------|-----------|-------------|---------|------------------------|----------|--|---------|
| 58129 | yellow-g2 | FBgn0035328 | CG13804 | P{TRiP.HMJ22078}attP40 | Enhancer |  |         |
| 32954 | Zip3      | FBgn0038412 | CG6898  | P{TRiP.HMS00748}attP2  | Enhancer |  | SLC39A1 |
| 37358 | Zip3      | FBgn0038412 | CG6898  | VDR.C.37358            | Enhancer |  | SLC39A1 |
| 39049 | ZnT35C    | FBgn0028516 | CG11376 | P{TRiP.HMS01969}attP40 | Enhancer |  | SLC30A8 |
| 3836  | ZnT35C    | FBgn0028516 | CG11376 | VDR.C.3836             | Enhancer |  | SLC30A8 |

|

SI Appendix Table 2. All genetic reagents used in RNAi screen.

| Line   | Gene          | Flybase ID  | Gene ID | Reagent                 |
|--------|---------------|-------------|---------|-------------------------|
| 35890  | 128up         | FBgn0010339 | CG8340  | VDR.C.35890             |
| 110370 | 128up         | FBgn0010339 | CG8340  | VDR.C.110370            |
| 34884  | 14-3-3epsilon | FBgn0020238 | CG31196 | P{TRIP.HM.S01229}attP2  |
| 28327  | 14-3-3zeta    | FBgn0004907 | CG17870 | P{TRIP.JF02962}attP2    |
| 48717  | 140up         | FBgn0010340 | CG9852  | VDR.C.48717             |
| 30498  | 18w           | FBgn0004364 | CG8896  | P{TRIP.HM.S05241}attP2  |
| 32887  | 26-29-p       | FBgn0250848 | CG8947  | P{TRIP.HM.S00675}attP2  |
| 28553  | 2mit          | FBgn0260793 | CG42573 | P{TRIP.HM.S05039}attP2  |
| 28109  | 2mit          | FBgn0260793 | CG42573 | VDR.C.28109             |
| 43990  | 4EHP          | FBgn0053100 | CG33100 | P{TRIP.HM.S02703}attP40 |
| 33885  | 5-HT1A        | FBgn0004168 | CG16720 | P{TRIP.HM.S00823}attP2  |
| 33418  | 5-HT1B        | FBgn0004572 | CG15113 | P{TRIP.HM.S00300}attP2  |
| 31882  | 5-HT2         | FBgn0087012 | CG1056  | P{TRIP.JF02157}attP2    |
| 32471  | 5-HT7         | FBgn0004573 | CG12073 | P{TRIP.HM.S00471}attP2  |
| 29620  | 5Ptasel       | FBgn0259178 | CG42283 | P{TRIP.JF03299}attP2    |
| 27989  | 7B2           | FBgn0041707 | CG1168  | P{TRIP.JF02917}attP2    |
| 110121 | 825-Oak       | FBgn0052208 | CG32208 | VDR.C.110121            |
| 16826  | a             | FBgn0000008 | CG6741  | VDR.C.16826             |
| 41993  | a10           | FBgn0011293 | CG6642  | P{TRIP.HM.S02394}attP40 |
| 107578 | A16           | FBgn0028965 | CG9933  | VDR.C.107578            |
| 32476  | A2bp1         | FBgn0052062 | CG32062 | P{TRIP.HM.S00478}attP2  |
| 44713  | a5            | FBgn0011294 | CG5430  | VDR.C.44713             |
| 1840   | a6            | FBgn0023130 | CG3771  | VDR.C.1840              |
| 51472  | Aac11         | FBgn0027885 | CG6582  | VDR.C.51472             |
| 18182  | Aaaf          | FBgn0031851 | CG11188 | VDR.C.18182             |
| 39776  | Aats-ala      | FBgn0027094 | CG13391 | VDR.C.39776             |
| 43274  | Aats-ala-m    | FBgn0028962 | CG4633  | P{TRIP.GL.C01463}attP2  |
| 42184  | Aats-arg      | FBgn0027093 | CG9020  | VDR.C.42184             |
| 28317  | Aats-asn      | FBgn0086443 | CG10687 | P{TRIP.JF02948}attP2    |
| 42606  | Aats-asp      | FBgn0002069 | CG3821  | P{TRIP.HM.S02439}attP40 |
| 26959  | Aats-cys      | FBgn0027091 | CG8431  | VDR.C.26959             |
| 101761 | Aats-gln      | FBgn0027090 | CG10506 | VDR.C.101761            |
| 34994  | Aats-glupro   | FBgn0005674 | CG5394  | VDR.C.34994             |
| 44606  | Aats-gly      | FBgn0027088 | CG6778  | VDR.C.44606             |
| 51485  | Aats-his      | FBgn0027087 | CG6335  | P{TRIP.HM.C03232}attP40 |
| 58176  | Aats-ile      | FBgn0027086 | CG11471 | P{TRIP.HM.J22153}attP40 |
| 45048  | Aats-leu      | FBgn0027085 | CG7479  | VDR.C.45048             |
| 32967  | Aats-lys      | FBgn0027084 | CG12141 | P{TRIP.HM.S00763}attP2  |
| 106493 | Aats-met      | FBgn0027083 | CG31322 | VDR.C.106493            |
| 36554  | Aats-phe      | FBgn0020766 | CG13348 | VDR.C.36554             |
| 17068  | Aats-pro      | FBgn0027082 | CG12186 | VDR.C.17068             |
| 41928  | Aats-ser      | FBgn0021750 | CG4938  | VDR.C.41928             |
| 34886  | Aats-thr      | FBgn0027081 | CG5353  | P{TRIP.HM.S01231}attP2  |
| 42902  | Aats-thr      | FBgn0027081 | CG5353  | P{TRIP.HM.S02595}attP40 |
| 23949  | Aats-trp      | FBgn0010803 | CG9735  | VDR.C.23949             |
| 40541  | Aats-tyr      | FBgn0027080 | CG4561  | VDR.C.40541             |
| 51895  | Aats-tyr-m    | FBgn0035064 | CG16912 | P{TRIP.HM.C03469}attP40 |
| 34338  | Aats-val      | FBgn0027079 | CG4062  | P{TRIP.HM.S01326}attP2  |
| 38338  | aay           | FBgn0023129 | CG3705  | P{TRIP.HM.S01805}attP2  |
| 32378  | ab            | FBgn0259750 | CG43860 | P{TRIP.HM.S00369}attP2  |
| 31588  | abba          | FBgn0034412 | CG7955  | P{TRIP.JF01164}attP2    |
| 51696  | ABCB7         | FBgn0035244 | CG7955  | P{TRIP.HM.C03142}attP2  |
| 28739  | abd-A         | FBgn0000014 | CG10325 | P{TRIP.JF03167}attP2    |
| 26746  | Abd-B         | FBgn0000015 | CG11648 | P{TRIP.JF02309}attP2    |
| 36707  | Abi           | FBgn0020510 | CG9749  | P{TRIP.HM.S01597}attP2  |
| 41710  | Abl           | FBgn0000017 | CG4032  | P{TRIP.HM.S02275}attP40 |
| 27562  | abo           | FBgn0000018 | CG6093  | VDR.C.27562             |
| 107031 | abs           | FBgn0015331 | CG14637 | VDR.C.107031            |
| 29586  | ac            | FBgn0000022 | CG3796  | P{TRIP.JF03265}attP2    |
| 110750 | Ac13E         | FBgn0022710 | CG9210  | VDR.C.110750            |
| 28626  | Ac3           | FBgn0023416 | CG1506  | P{TRIP.JF03041}attP2    |
| 51974  | Ac76E         | FBgn0004852 | CG7978  | VDR.C.51974             |
| 51978  | Ac78C         | FBgn0024150 | CG10564 | VDR.C.51978             |
| 103279 | Acam          | FBgn0011273 | CG17769 | VDR.C.103279            |
| 34885  | ACC           | FBgn0033246 | CG11198 | P{TRIP.HM.S01230}attP2  |
| 41917  | AcCoAS        | FBgn0012034 | CG9390  | P{TRIP.HM.S02314}attP2  |
| 25958  | Ace           | FBgn0000024 | CG17907 | P{TRIP.JF01978}attP2    |

|        |          |             |         |                        |
|--------|----------|-------------|---------|------------------------|
| 3324   | Acer     | FBgn0016122 | CG10593 | VDRC.3324              |
| 31340  | Acf1     | FBgn0027620 | CG1966  | P(TRIP.JF01298)attP2   |
| 34652  | achi     | FBgn0033749 | CG8819  | P(TRIP.HMS01127)attP2  |
| 29335  | acj6     | FBgn0000028 | CG9151  | P(TRIP.JF02497)attP2   |
| 33941  | Ack      | FBgn0028484 | CG14992 | P(TRIP.HMS00892)attP2  |
| 16052  | Acn      | FBgn0263198 | CG10473 | VDRC.16052             |
| 34028  | Acon     | FBgn0010100 | CG1966  | P(TRIP.HMS00998)attP2  |
| 29117  | Acx57D-d | FBgn0034629 | CG9709  | VDRC.29117             |
| 50567  | Acx57D-p | FBgn0034628 | CG9707  | P(TRIP.GLC01688)attP2  |
| 34677  | Acp1     | FBgn0014454 | CG7216  | P(TRIP.HMS01155)attP2  |
| 44047  | Acp62F   | FBgn0020509 | CG1262  | P(TRIP.HMS02763)attP2  |
| 25998  | Acp70A   | FBgn0003034 | CG17673 | P(TRIP.JF02022)attP2   |
| 3579   | Acph-1   | FBgn0000032 | CG7899  | VDRC.3579              |
| 41885  | Acsl     | FBgn0263120 | CG8732  | P(TRIP.HMS02307)attP40 |
| 43268  | Acsl     | FBgn0263120 | CG8732  | P(TRIP.GLC01457)attP2  |
| 50625  | Act42A   | FBgn0000043 | CG12051 | P(TRIP.HMC02992)attP2  |
| 31551  | Act57B   | FBgn0000044 | CG10067 | P(TRIP.JF01113)attP2   |
| 42651  | Act5C    | FBgn0000042 | CG4027  | P(TRIP.HMS02487)attP2  |
| 36857  | Act79B   | FBgn0000045 | CG7478  | P(TRIP.HMS00303)attP2  |
| 42652  | Act87E   | FBgn0000046 | CG18290 | P(TRIP.HMS02488)attP2  |
| 9780   | Act88F   | FBgn0000047 | CG5178  | VDRC.9780              |
| 42493  | Actbeta  | FBgn0024913 | CG11062 | P(TRIP.HMJ02057)attP40 |
| 34874  | Actn     | FBgn0000667 | CG4376  | P(TRIP.HMS00193)attP2  |
| 26737  | Actn3    | FBgn0015008 | CG8953  | P(TRIP.JF02279)attP2   |
| 49100  | ACXA     | FBgn0040510 | CG17176 | VDRC.49100             |
| 9748   | ACXB     | FBgn0040509 | CG17174 | VDRC.9748              |
| 2870   | ACXC     | FBgn0040508 | CG5983  | VDRC.2870              |
| 35589  | ACXD     | FBgn0040507 | CG5712  | P(TRIP.GL00425)attP2   |
| 105745 | Acyp2    | FBgn0038363 | CG18505 | VDRC.105745            |
| 26015  | Ada      | FBgn0037661 | CG11994 | P(TRIP.JF02040)attP2   |
| 50905  | Ada2a    | FBgn0263738 | CG43663 | P(TRIP.HMJ03126)attP40 |
| 31347  | Ada2b    | FBgn0037555 | CG9638  | P(TRIP.JF01305)attP2   |
| 110514 | Adam     | FBgn0027619 | CG12131 | VDRC.110514            |
| 110157 | AdamTS-A | FBgn0038341 | CG14869 | VDRC.110157            |
| 28311  | Adar     | FBgn0026086 | CG12598 | P(TRIP.JF02942)attP2   |
| 32765  | adat     | FBgn0028658 | CG16889 | VDRC.32765             |
| 36686  | ade2     | FBgn0000052 | CG9127  | P(TRIP.HMS01574)attP2  |
| 47972  | ade2     | FBgn0000052 | CG9127  | VDRC.47972             |
| 46293  | ade3     | FBgn0000053 | CG31628 | VDRC.46293             |
| 2901   | ade5     | FBgn0020513 | CG3989  | VDRC.2901              |
| 17533  | AdenoK   | FBgn0036337 | CG11255 | VDRC.17533             |
| 28680  | Adf1     | FBgn0000054 | CG15845 | P(TRIP.JF03095)attP2   |
| 50426  | Adgf-A   | FBgn0036752 | CG5992  | VDRC.50426             |
| 106269 | Adgf-B   | FBgn0036751 | CG5998  | VDRC.106269            |
| 42915  | Adgf-C   | FBgn0038173 | CG9345  | P(TRIP.HMS02608)attP40 |
| 5645   | Adgf-D   | FBgn0038172 | CG9621  | VDRC.5645              |
| 51564  | Adgf-E   | FBgn0033952 | CG10143 | VDRC.51564             |
| 28627  | Adh      | FBgn0000055 | CG3481  | P(TRIP.JF03042)attP2   |
| 28627  | Adhr     | FBgn0000056 | CG3484  | P(TRIP.JF03042)attP2   |
| 40935  | AdipoR   | FBgn0038984 | CG5315  | VDRC.40935             |
| 51799  | Adk1     | FBgn0022709 | CG17146 | P(TRIP.HMC03355)attP40 |
| 35294  | Adk2     | FBgn0022708 | CG3140  | P(TRIP.GL00196)attP2   |
| 36072  | Adk3     | FBgn0042094 | CG6612  | P(TRIP.GL00490)attP2   |
| 27536  | AdoR     | FBgn0039747 | CG9753  | P(TRIP.JF02687)attP2   |
| 22008  | adp      | FBgn0000057 | CG5124  | VDRC.22008             |
| 35358  | Ady43A   | FBgn0026602 | CG1851  | P(TRIP.GL00270)attP2   |
| 31942  | Aef1     | FBgn0005694 | CG5683  | P(TRIP.JF02233)attP2   |
| 46174  | aft      | FBgn0026309 | CG5032  | VDRC.46174             |
| 104750 | Afti     | FBgn0038223 | CG8538  | VDRC.104750            |
| 28229  | Ag5r     | FBgn0015010 | CG9538  | VDRC.28229             |
| 14807  | Ag5r2    | FBgn0020508 | CG9540  | VDRC.14807             |
| 42753  | AGBE     | FBgn0053138 | CG33138 | P(TRIP.GL00708)attP2   |
| 40860  | AGBE     | FBgn0053138 | CG33138 | P(TRIP.HMS02027)attP40 |
| 34802  | ago      | FBgn0041171 | CG15010 | P(TRIP.HMS00111)attP2  |
| 31501  | ago      | FBgn0041171 | CG15010 | TRIP.HM04005)attP2     |
| 33727  | AGO1     | FBgn0262739 | CG6671  | P(TRIP.HMS00610)attP2  |
| 34799  | AGO2     | FBgn0087035 | CG7439  | P(TRIP.HMS00108)attP2  |
| 34815  | AGO3     | FBgn0250816 | CG40300 | P(TRIP.HMS00125)attP2  |

|        |                       |             |         |                        |
|--------|-----------------------|-------------|---------|------------------------|
| 35232  | AGO3                  | FBgn0250816 | CG40300 | TRIP.GL00117}attP2     |
| 44461  | agl                   | FBgn0024912 | CG1303  | P{TRIP.GLC01616}attP2  |
| 51477  | Ahcy13                | FBgn0014455 | CG11654 | P{TRIP.HMC03222}attP40 |
| 3343   | Ahcy89E               | FBgn0015011 | CG8956  | VDRC.3343              |
| 56009  | Ahcy89E               | FBgn0015011 | CG8956  | P{TRIP.HMC04305}attP40 |
| 61913  | Ahcy89E               | FBgn0015011 | CG8956  | P{TRIP.HMJ23469}attP40 |
| 2544   | AIF                   | FBgn0031392 | CG7263  | VDRC.2544              |
| 35372  | Ak6                   | FBgn0033754 | CG8816  | P{TRIP.GL00285}attP2   |
| 42539  | Akap200               | FBgn0027932 | CG13388 | P{TRIP.HMJ02109}attP40 |
| 34960  | Akh                   | FBgn0004552 | CG1171  | P{TRIP.HMS00477}attP2  |
| 34036  | akirin                | FBgn0082598 | CG8580  | P{TRIP.HMS01010}attP2  |
| 33615  | Akt1                  | FBgn0010379 | CG4006  | P{TRIP.HMS00007}attP2  |
| 26747  | al                    | FBgn0000061 | CG3935  | P{TRIP.JF02310}attP2   |
| 51489  | Alas                  | FBgn0020764 | CG3017  | P{TRIP.HMC03240}attP2  |
| 33429  | alc                   | FBgn0260972 | CG8057  | P{TRIP.HMS00316}attP2  |
| 25940  | AICR2                 | FBgn0036789 | AICR2   | P{TRIP.JF01960}attP2   |
| 26301  | Ald1                  | FBgn0000064 | CG6058  | P{TRIP.JF02071}attP2   |
| 36658  | ald                   | FBgn0000063 | CG7643  | P{TRIP.HMS01546}attP2  |
| 34989  | Aldh                  | FBgn0012036 | CG3752  | P{TRIP.HMS01399}attP2  |
| 51820  | Aldh-III              | FBgn0010548 | CG11140 | P{TRIP.HMC03391}attP2  |
| 34681  | Alg10                 | FBgn0052076 | CG32076 | P{TRIP.HMS01159}attP2  |
| 39057  | Alh                   | FBgn0261238 | CG1070  | P{TRIP.HMS01977}attP2  |
| 28908  | alien                 | FBgn0013746 | CG9556  | P{TRIP.HM05119}attP2   |
| 33417  | ALIX                  | FBgn0086346 | CG12876 | P{TRIP.HMS00298}attP2  |
| 27518  | Alk                   | FBgn0040505 | CG8250  | P{TRIP.JF02668}attP2   |
| 43300  | AlkB                  | FBgn0065035 | CG33250 | P{TRIP.HMS02673}attP40 |
| 40873  | alph                  | FBgn0086361 | CG1906  | P{TRIP.HMS02040}attP2  |
| 32866  | alpha-Adaptin         | FBgn0015567 | CG4260  | P{TRIP.HMS00653}attP2  |
| 38987  | alpha-Cat             | FBgn0010215 | CG17947 | P{TRIP.HMS01903}attP40 |
| 31217  | alpha-catenin-related | FBgn0029105 | CG2987  | P{TRIP.JF01772}attP2   |
| 31220  | alpha-Est1            | FBgn0015568 | CG1031  | VDRC.31220             |
| 18048  | alpha-Est10           | FBgn0015569 | CG1131  | VDRC.18048             |
| 20879  | alpha-Est2            | FBgn0015570 | CG2505  | VDRC.20879             |
| 101671 | alpha-Est3            | FBgn0015571 | CG1257  | VDRC.101671            |
| 45102  | alpha-Est4            | FBgn0015572 | CG1082  | VDRC.45102             |
| 27332  | alpha-Est5            | FBgn0261393 | CG1089  | VDRC.27332             |
| 33992  | alpha-Est7            | FBgn0015575 | CG1112  | P{TRIP.HMS00955}attP2  |
| 107098 | alpha-Est8            | FBgn0015576 | CG1121  | VDRC.107098            |
| 110537 | alpha-Est9            | FBgn0015577 | CG1128  | VDRC.110537            |
| 5528   | alpha-Man-I           | FBgn0259170 | CG42275 | VDRC.5528              |
| 4419   | alpha-Man-Ib          | FBgn0039634 | CG11874 | VDRC.4419              |
| 5838   | alpha-Man-II          | FBgn0011740 | CG18802 | VDRC.5838              |
| 42652  | alpha-Man-IIb         | FBgn0026616 | CG4606  | VDRC.42652             |
| 31209  | alpha-Spec            | FBgn0250789 | CG1977  | P{TRIP.JF01727}attP2   |
| 2608   | alpha4GT1             | FBgn0031491 | CG17223 | VDRC.2608              |
| 34923  | alphaCop              | FBgn0025725 | CG7961  | P{TRIP.HMS01272}attP2  |
| 50514  | alphaCop              | FBgn0025725 | CG7961  | P{TRIP.GLC01632}attP40 |
| 51824  | alphaTry              | FBgn0003863 | CG18444 | P{TRIP.HMC03396}attP2  |
| 32502  | alphaTub67C           | FBgn0087040 | CG8308  | P{TRIP.HMS00506}attP2  |
| 33427  | alphaTub84B           | FBgn0003884 | CG1913  | VDRC.33427             |
| 42905  | alphaTub85E           | FBgn0003886 | CG9476  | P{TRIP.HMS02598}attP40 |
| 50588  | Alr                   | FBgn0031068 | CG12534 | P{TRIP.GLC01710}attP2  |
| 28624  | airm                  | FBgn0039332 | CG11910 | P{TRIP.JF03039}attP2   |
| 27280  | AlstR                 | FBgn0028961 | CG2872  | P{TRIP.JF02578}attP2   |
| 106737 | ait                   | FBgn0038535 | CG18212 | VDRC.106737            |
| 36723  | aly                   | FBgn0004372 | CG2075  | P{TRIP.HMS01614}attP2  |
| 33416  | Ama                   | FBgn0000071 | CG2198  | P{TRIP.HMS00297}attP2  |
| 104646 | amd                   | FBgn0000075 | CG10501 | VDRC.104646            |
| 25797  | amn                   | FBgn0086782 | CG11937 | P{TRIP.JF01814}attP2   |
| 28583  | amon                  | FBgn0023179 | CG6438  | P{TRIP.HM05071}attP2   |
| 104651 | amos                  | FBgn0003270 | CG10393 | VDRC.104651            |
| 39015  | Amph                  | FBgn0027356 | CG8604  | P{TRIP.HMS01933}attP40 |
| 43241  | Amun                  | FBgn0030328 | CG2446  | P{TRIP.GLC01428}attP2  |
| 3295   | amx                   | FBgn0000077 | CG12127 | VDRC.3295              |
| 109082 | Amy-d                 | FBgn0000078 | CG17876 | VDRC.109082            |
| 27515  | ana                   | FBgn0011746 | CG8084  | P{TRIP.JF02665}attP2   |
| 44358  | ana2                  | FBgn0027513 | CG8262  | VDRC.44358             |
| 7943   | ana3                  | FBgn0266111 | CG13162 | VDRC.7943              |



|        |           |             |         |                        |
|--------|-----------|-------------|---------|------------------------|
| 36749  | Ance      | FBgn0012037 | CG8827  | P{TRIP.HMS03009}attP2  |
| 50691  | Ance-2    | FBgn0032535 | CG16869 | P{TRIP.HMC03092}attP2  |
| 21731  | Ance-3    | FBgn0032536 | CG17988 | VDRC.21731             |
| 30904  | Ance-4    | FBgn0033366 | CG8196  | VDRC.21731             |
| 50703  | Ance-5    | FBgn0035076 | CG10142 | P{TRIP.HMC03105}attP2  |
| 15245  | Ance-5    | FBgn0035076 | CG10142 | VDRC.15245             |
| 51153  | Andorra   | FBgn0030898 | CG12611 | VDRC.51153             |
| 38947  | angel     | FBgn0016762 | CG12273 | P{TRIP.HMS01861}attP2  |
| 31115  | Ank       | FBgn0011747 | CG1651  | P{TRIP.JF01588}attP2   |
| 33414  | Ank2      | FBgn0261788 | CG42734 | P{TRIP.HMS00295}attP2  |
| 38523  | AnnlX     | FBgn0000083 | CG5730  | P{TRIP.HMS01719}attP40 |
| 38272  | AnnX      | FBgn0000084 | CG9579  | P{TRIP.HMS01720}attP40 |
| 41880  | AnnX      | FBgn0000084 | CG9579  | P{TRIP.HMS02294}attP2  |
| 9706   | Anp       | FBgn0000094 | CG1361  | VDRC.9706              |
| 5532   | Ant2      | FBgn0025111 | CG1683  | VDRC.5532              |
| 106351 | antdh     | FBgn0026268 | CG1386  | VDRC.106351            |
| 27675  | Antp      | FBgn0260642 | CG1028  | P{TRIP.JF02754}attP2   |
| 38311  | Anxb11    | FBgn0030749 | CG9968  | P{TRIP.HMS01775}attP40 |
| 34909  | aop       | FBgn0000097 | CG3166  | P{TRIP.HMS01256}attP2  |
| 28383  | aos       | FBgn0004569 | CG4531  | P{TRIP.JF03020}attP2   |
| 28972  | Aos1      | FBgn0029512 | CG12276 | P{TRIP.HMS0183}attP2   |
| 41673  | ap        | FBgn0000099 | CG8376  | P{TRIP.HMS02207}attP2  |
| 27533  | AP-1gamma | FBgn0030089 | CG9113  | P{TRIP.JF02684}attP2   |
| 40895  | AP-1sigma | FBgn0039132 | CG5864  | P{TRIP.HMS02143}attP2  |
| 40911  | AP-2      | FBgn0261953 | CG7807  | P{TRIP.HMS02159}attP40 |
| 27322  | AP-2sigma | FBgn0043012 | CG6056  | P{TRIP.JF02631}attP2   |
| 27534  | AP-47     | FBgn0024833 | CG9388  | P{TRIP.JF02685}attP2   |
| 28040  | AP-50     | FBgn0024832 | CG7057  | P{TRIP.JF02875}attP2   |
| 34869  | Apc       | FBgn0015589 | CG1451  | P{TRIP.HMS00188}attP2  |
| 34858  | Apc10     | FBgn0034231 | CG11419 | P{TRIP.HMS00176}attP2  |
| 34875  | Apc2      | FBgn0026598 | CG6193  | P{TRIP.HMS00194}attP2  |
| 38988  | APC4      | FBgn0052707 | CG32707 | VDRC.38988             |
| 17622  | APC7      | FBgn0029879 | CG14444 | VDRC.17622             |
| 39150  | Apf       | FBgn0051713 | CG31713 | VDRC.39150             |
| 38249  | aph-1     | FBgn0031458 | CG2855  | P{TRIP.HMS01693}attP40 |
| 33673  | Aph-4     | FBgn0016123 | CG1462  | P{TRIP.HMS00537}attP2  |
| 28740  | Aph-4     | FBgn0016123 | CG1462  | P{TRIP.JF03168}attP2   |
| 38245  | aPKC      | FBgn0261854 | CG42783 | P{TRIP.HMS01689}attP40 |
| 26024  | Aplip1    | FBgn0040281 | CG1200  | P{TRIP.JF02049}attP2   |
| 51937  | Apoltp    | FBgn0032136 | CG15828 | P{TRIP.HMC03294}attP2  |
| 35280  | app       | FBgn0260941 | CG42318 | P{TRIP.GL00181}attP2   |
| 7728   | APP-BP1   | FBgn0261112 | CG7828  | VDRC.7728              |
| 39013  | Appl      | FBgn0000108 | CG7727  | P{TRIP.HMS01931}attP40 |
| 19102  | Aprt      | FBgn0000109 | CG18315 | VDRC.19102             |
| 50651  | Aps       | FBgn0036111 | CG6391  | P{TRIP.HMC03052}attP2  |
| 26236  | apt       | FBgn0015903 | CG5393  | P{TRIP.JF02134}attP2   |
| 51504  | AQP       | FBgn0033807 | CG12251 | P{TRIP.HMC03266}attP2  |
| 25935  | AR-2      | FBgn0039595 | CG10001 | P{TRIP.JF01955}attP2   |
| 27060  | ara       | FBgn0015904 | CG10571 | P{TRIP.JF02402}attP2   |
| 56884  | aralar1   | FBgn0028646 | CG2139  | P{TRIP.HMC04105}attP40 |
| 25954  | Arc1      | FBgn0033926 | CG12505 | P{TRIP.JF01974}attP2   |
| 3464   | Arc2      | FBgn0033928 | CG13941 | VDRC.3464              |
| 53287  | Arc42     | FBgn0038742 | CG4703  | P{TRIP.HMC03503}attP40 |
| 38983  | aret      | FBgn0000114 | CG31762 | P{TRIP.HMS01899}attP40 |
| 27268  | Arf102F   | FBgn0013749 | CG11027 | P{TRIP.JF02581}attP2   |
| 27261  | Arf51F    | FBgn0013750 | CG8156  | P{TRIP.JF02549}attP2   |
| 27052  | Arf72A    | FBgn0000115 | CG6025  | P{TRIP.JF02378}attP2   |
| 29538  | Arf79F    | FBgn0010348 | CG8385  | P{TRIP.JF01809}attP2   |
| 29588  | Arf84F    | FBgn0004908 | CG7435  | P{TRIP.JF03267}attP2   |
| 50584  | ArfGAP1   | FBgn0020655 | CG4237  | P{TRIP.GL01706}attP2   |
| 20401  | Arfip     | FBgn0037884 | CG17184 | VDRC.20401             |
| 14933  | arg       | FBgn0023535 | CG18104 | VDRC.14933             |
| 31959  | Argk      | FBgn0000116 | CG32031 | P{TRIP.JF02699}attP2   |
| 41697  | Argk      | FBgn0000116 | CG32031 | P{TRIP.HMS02262}attP2  |
| 29416  | ari-1     | FBgn0017418 | CG5659  | P{TRIP.JF03352}attP2   |
| 44646  | ari-2     | FBgn0025186 | CG5709  | P{TRIP.HMC02353}attP2  |
| 33924  | Ark       | FBgn0263864 | CG6829  | P{TRIP.HMS00870}attP2  |
| 41690  | Arl4      | FBgn0039889 | CG2219  | VDRC.41690             |

|        |                       |             |         |                        |
|--------|-----------------------|-------------|---------|------------------------|
| 54014  | Arl4                  | FBgn0039889 | CG2219  | P(TRIP.HMJ21438)attP40 |
| 35004  | arm                   | FBgn0000117 | CG11579 | P(TRIP.HMS01414)attP2  |
| 34789  | armi                  | FBgn0041164 | CG11513 | P(TRIP.HMS00098)attP2  |
| 104010 | Arp10                 | FBgn0031050 | CG12235 | VDRC.104010            |
| 27705  | Arp14D                | FBgn0011742 | CG9901  | P(TRIP.JF02785)attP2   |
| 33009  | Arp5                  | FBgn0038576 | CG7940  | P(TRIP.HMS00809)attP2  |
| 22633  | Arp5                  | FBgn0038576 | CG7940  | VDRC.22633             |
| 44580  | Arp53D                | FBgn0011743 | CG5409  | P(TRIP.HMS02876)attP2  |
| 17242  | Arp6                  | FBgn0011741 | CG11678 | VDRC.17242             |
| 108081 | Arp6                  | FBgn0011741 | CG11678 | VDRC.108081            |
| 32921  | Arp66B                | FBgn0262716 | CG7558  | P(TRIP.HMS00711)attP2  |
| 31202  | Arp8                  | FBgn0030877 | CG7846  | P(TRIP.JF01720)attP2   |
| 32032  | Arp87C                | FBgn0011745 | CG6174  | P(TRIP.HM05259)attP2   |
| 43132  | Arpc2                 | FBgn0032859 | CG10954 | P(TRIP.GL01469)attP2   |
| 28011  | Arpc2                 | FBgn0032859 | CG10954 | P(TRIP.JF02845)attP2   |
| 27044  | Arpc3A                | FBgn0038369 | CG4560  | P(TRIP.JF02370)attP2   |
| 27528  | Arpc3B                | FBgn0065032 | CG8936  | P(TRIP.JF02679)attP2   |
| 42875  | Arpc4                 | FBgn0284255 | CG5972  | P(TRIP.HMS02568)attP40 |
| 41888  | Arpc4                 | FBgn0284255 | CG5972  | P(TRIP.HMS02210)attP2  |
| 31313  | arr                   | FBgn0000119 | CG5912  | P(TRIP.JF01260)attP2   |
| 42691  | arr                   | FBgn0000119 | CG5912  | P(UAS-arr.flu)3        |
| 22196  | Arr1                  | FBgn0000120 | CG5711  | VDRC.22196             |
| 36777  | Arr2                  | FBgn0000121 | CG5962  | P(TRIP.JF02392)attP2   |
| 32844  | Ars2                  | FBgn0033062 | CG7843  | P(TRIP.HMS00626)attP2  |
| 31348  | Art1                  | FBgn0037834 | CG6554  | P(TRIP.JF01306)attP2   |
| 26057  | Art2                  | FBgn0031592 | CG3675  | VDRC.26057             |
| 109448 | Art3                  | FBgn0038306 | CG6563  | VDRC.109448            |
| 31349  | Art4                  | FBgn0037770 | CG5358  | P(TRIP.JF01307)attP2   |
| 36831  | Art6                  | FBgn0038189 | CG9927  | P(TRIP.GL01070)attP2   |
| 36832  | Art7                  | FBgn0034817 | CG9882  | P(TRIP.GL01071)attP2   |
| 20305  | Art8                  | FBgn0032329 | CG16840 | VDRC.20305             |
| 105577 | Art9                  | FBgn0038188 | CG9929  | VDRC.105577            |
| 50730  | aru                   | FBgn0029095 | CG4276  | P(TRIP.HMS02966)attP2  |
| 40479  | arx                   | FBgn0036826 | CG3893  | VDRC.40479             |
| 35629  | Asator                | FBgn0039908 | CG11533 | P(TRIP.GL00476)attP2   |
| 31895  | ase                   | FBgn0000137 | CG3258  | P(TRIP.JF02183)attP2   |
| 35273  | asf1                  | FBgn0029094 | CG9383  | P(TRIP.GL00171)attP2   |
| 33705  | ash1                  | FBgn0005386 | CG8887  | P(TRIP.HMS00582)attP2  |
| 35388  | ash2                  | FBgn0000139 | CG6677  | VDRC.35388             |
| 35039  | asl                   | FBgn0261004 | CG2919  | P(TRIP.HMS01453)attP2  |
| 28741  | asp                   | FBgn0000140 | CG6875  | P(TRIP.JF03169)attP2   |
| 35739  | asparagine-synthetase | FBgn0270926 | CG33486 | P(TRIP.HMS01481)attP2  |
| 101484 | Asph                  | FBgn0034075 | CG8421  | VDRC.101484            |
| 25332  | ASPP                  | FBgn0034606 | CG18375 | VDRC.25332             |
| 43228  | asrij                 | FBgn0034793 | CG13533 | P(TRIP.GL01573)attP2   |
| 25866  | Ast                   | FBgn0015591 | CG13633 | P(TRIP.JF01905)attP2   |
| 51700  | ast                   | FBgn0015905 | CG4426  | P(TRIP.HMC03173)attP2  |
| 25868  | Ast-C                 | FBgn0032336 | CG14919 | P(TRIP.JF01907)attP2   |
| 3399   | AstA-R1               | FBgn0266429 | CG2872  | VDRC.3399              |
| 22442  | asun                  | FBgn0020407 | CG6814  | VDRC.22442             |
| 31192  | Asx                   | FBgn0261823 | CG8787  | P(TRIP.JF01708)attP2   |
| 51677  | Asx                   | FBgn0261823 | CG8787  | P(TRIP.GLC01660)attP2  |
| 36092  | Atac1                 | FBgn0031876 | CG9200  | VDRC.36092             |
| 32890  | Atac2                 | FBgn0032691 | CG10414 | P(TRIP.HMS00678)attP2  |
| 31154  | Atac3                 | FBgn0052343 | CG32343 | P(TRIP.JF01631)attP2   |
| 26763  | ATbp                  | FBgn0039946 | CG17172 | P(TRIP.JF02327)attP2   |
| 53867  | Ate1                  | FBgn0025720 | CG9204  | P(TRIP.GLC01821)attP2  |
| 28111  | Ate1                  | FBgn0025720 | CG9204  | VDRC.28111             |
| 50563  | Alet                  | FBgn0020762 | CG2969  | P(TRIP.GLC01683)attP2  |
| 26210  | Atf-2                 | FBgn0265193 | CG44246 | P(TRIP.JF02108)attP2   |
| 26741  | Atf3                  | FBgn0028550 | CG11405 | P(TRIP.JF02303)attP2   |
| 26211  | Atf6                  | FBgn0033010 | CG3136  | P(TRIP.JF02109)attP2   |
| 26731  | Atg1                  | FBgn0260945 | CG10967 | P(TRIP.JF02273)attP2   |
| 44034  | Atg1                  | FBgn0260945 | CG10967 | P(TRIP.HMS02750)attP40 |
| 34675  | Atg12                 | FBgn0036255 | CG10861 | P(TRIP.HMS01153)attP2  |
| 40861  | Atg13                 | FBgn0261108 | CG7331  | P(TRIP.HMS02028)attP40 |
| 36918  | Atg17                 | FBgn0037363 | CG1347  | P(TRIP.HMS01611)attP2  |
| 24515  | Atg17                 | FBgn0037363 | CG1347  | VDRC.24515             |

|        |              |             |         |                        |
|--------|--------------|-------------|---------|------------------------|
| 34714  | Atg18        | FBgn0035850 | CG7986  | P{TRIP.HMS01193}attP2  |
| 28061  | Atg18        | FBgn0035850 | CG7986  | P{TRIP.JF02898}attP2   |
| 34719  | Atg2         | FBgn0044452 | CG1241  | P{TRIP.HMS01198}attP2  |
| 35740  | Atg4         | FBgn0031298 | CG4428  | P{TRIP.HMS01482}attP2  |
| 44421  | Atg4         | FBgn0031298 | CG4428  | P{TRIP.GLC01355}attP40 |
| 34899  | Atg5         | FBgn0029943 | CG1643  | P{TRIP.HMS01244}attP2  |
| 35741  | Atg6         | FBgn0264325 | CG5429  | P{TRIP.HMS01483}attP2  |
| 34369  | Atg7         | FBgn0034366 | CG5489  | P{TRIP.HMS01358}attP2  |
| 34340  | Atg8a        | FBgn0052672 | CG32672 | P{TRIP.HMS01328}attP2  |
| 34900  | Atg8b        | FBgn0038539 | CG12334 | P{TRIP.HMS01245}attP2  |
| 34901  | Atg9         | FBgn0034110 | CG3615  | P{TRIP.HMS01246}attP2  |
| 28055  | Atg9         | FBgn0034110 | CG3615  | P{TRIP.JF02891}attP2   |
| 44756  | atIla        | FBgn0032422 | CG6579  | VDRC.44756             |
| 36736  | atl          | FBgn0039213 | CG6668  | P{TRIP.HMS01627}attP40 |
| 20876  | atms         | FBgn0010750 | CG2503  | VDRC.20876             |
| 35017  | ato          | FBgn0010433 | CG7508  | P{TRIP.HMS01430}attP2  |
| 23057  | Atox1        | FBgn0052446 | CG32446 | VDRC.23057             |
| 31083  | ATP7         | FBgn0030343 | CG1886  | P{TRIP.JF01534}attP2   |
| 32913  | Atpalpha     | FBgn0002921 | CG5670  | P{TRIP.HMS00703}attP2  |
| 30282  | ATPCL        | FBgn0020236 | CG8322  | VDRC.30282             |
| 28062  | ATPsyn-b     | FBgn0019644 | CG8189  | P{TRIP.JF02899}attP2   |
| 28056  | ATPsyn-beta  | FBgn0010217 | CG11154 | P{TRIP.JF02892}attP2   |
| 51714  | ATPsyn-Cf6   | FBgn0016119 | CG4412  | P{TRIP.HMS03238}attP2  |
| 33740  | ATPsyn-d     | FBgn0016120 | CG6030  | P{TRIP.HMS01078}attP2  |
| 28723  | ATPsyn-gamma | FBgn0020235 | CG7610  | P{TRIP.JF03150}attP2   |
| 101378 | att-ORFA     | FBgn0067783 | CG4241  | VDRC.101378            |
| 9287   | AttA         | FBgn0012042 | CG10146 | VDRC.9287              |
| 33194  | AttB         | FBgn0041581 | CG18372 | VDRC.33194             |
| 42860  | AttC         | FBgn0041579 | CG4740  | VDRC.42860             |
| 33637  | AttD         | FBgn0038530 | CG7629  | VDRC.33637             |
| 17490  | Atu          | FBgn0019637 | CG1433  | VDRC.17490             |
| 106074 | Atu          | FBgn0019637 | CG1433  | VDRC.106074            |
| 28536  | Abx-1        | FBgn0029907 | CG4547  | P{TRIP.HMS05022}attP2  |
| 36114  | Abx2         | FBgn0041188 | CG5166  | P{TRIP.HMS01392}attP2  |
| 39026  | aub          | FBgn0000146 | CG6137  | P{TRIP.HMS01945}attP40 |
| 41889  | aurA         | FBgn0000147 | CG3068  | P{TRIP.HMS02205}attP40 |
| 9257   | aust         | FBgn0032104 | CG17009 | VDRC.9257              |
| 34359  | Auf1         | FBgn0036813 | CG6877  | P{TRIP.HMS01348}attP2  |
| 39017  | aux          | FBgn0037218 | CG1107  | P{TRIP.HMS01935}attP40 |
| 101471 | ave          | FBgn0050476 | CG30476 | VDRC.101471            |
| 19577  | Aven         | FBgn0030410 | CG15727 | VDRC.19577             |
| 42532  | awd          | FBgn0000150 | CG2210  | P{TRIP.HMS02099}attP40 |
| 31772  | Awh          | FBgn0013751 | CG1072  | P{TRIP.JF02403}attP2   |
| 31705  | Axn          | FBgn0026597 | CG7926  | P{TRIP.HMS04012}attP2  |
| 18866  | axo          | FBgn0262870 | CG43225 | VDRC.18866             |
| 100839 | Axs          | FBgn0000152 | CG9703  | VDRC.100839            |
| 26479  | Axud1        | FBgn0261647 | CG4272  | VDRC.100839            |
| 26230  | az2          | FBgn0025185 | CG1605  | P{TRIP.JF02128}attP2   |
| 27511  | b            | FBgn0000153 | CG7811  | P{TRIP.JF02661}attP2   |
| 31711  | B-H1         | FBgn0011758 | CG5529  | P{TRIP.HMS04018}attP2  |
| 44084  | B-H1         | FBgn0011758 | CG5529  | P{TRIP.HMS02801}attP2  |
| 33647  | B-H2         | FBgn0004854 | CG5488  | P{TRIP.HMS00048}attP2  |
| 31706  | B4           | FBgn0023407 | CG9239  | P{TRIP.HMS04013}attP2  |
| 37519  | B52          | FBgn0004587 | CG10851 | P{TRIP.HMS01661}attP40 |
| 38860  | B52          | FBgn0004587 | CG10851 | VDRC.38860             |
| 14526  | b6           | FBgn0024897 | CG3100  | VDRC.14526             |
| 35707  | bab1         | FBgn0004870 | CG9097  | P{TRIP.GLV21072}attP2  |
| 35720  | bab2         | FBgn0025525 | CG9102  | P{TRIP.GLV21085}attP2  |
| 40866  | babo         | FBgn0011300 | CG8224  | P{TRIP.HMS02033}attP40 |
| 41585  | babo         | FBgn0011300 | CG8224  | TRIP.GLV00702}attP2    |
| 35461  | Bacc         | FBgn0031453 | CG9894  | VDRC.35461             |
| 15541  | Bace         | FBgn0032049 | CG13095 | VDRC.15541             |
| 36108  | baf          | FBgn0031977 | CG7380  | P{TRIP.HMS00195}attP2  |
| 100612 | bai          | FBgn0045866 | CG11785 | VDRC.100612            |
| 44101  | Baldspot     | FBgn0260960 | CG3971  | P{TRIP.HMS02821}attP40 |
| 31350  | ball         | FBgn0027889 | CG6386  | P{TRIP.JF01308}attP2   |
| 33631  | barn         | FBgn0000158 | CG10422 | P{TRIP.HMS00029}attP2  |
| 27061  | bap          | FBgn0004862 | CG7902  | P{TRIP.JF02404}attP2   |

|        |               |             |         |                         |
|--------|---------------|-------------|---------|-------------------------|
| 28328  | Bap           | FBgn0010380 | CG12532 | P{TRIP.JF02963}attP2    |
| 26308  | Bap170        | FBgn0042085 | CG3274  | P{TRIP.JF02080}attP2    |
| 31708  | Bap55         | FBgn0025716 | CG6546  | P{TRIP.HM04015}attP2    |
| 33954  | Bap60         | FBgn0025463 | CG4303  | P{TRIP.HMS00909}attP2   |
| 42504  | barc          | FBgn0037081 | CG6049  | P{TRIP.HM.J02069}attP40 |
| 34068  | barr          | FBgn0014127 | CG10726 | P{TRIP.HMS00049}attP2   |
| 39072  | baz           | FBgn0000163 | CG5055  | P{TRIP.HMS01992}attP40  |
| 50535  | bbc           | FBgn0033844 | CG6016  | P{TRIP.GLC01653}attP2   |
| 15974  | bbg           | FBgn0087007 | CG42230 | VDRC.15974              |
| 8455   | BBS1          | FBgn0035741 | CG14825 | VDRC.8455               |
| 53305  | BBS4          | FBgn0033578 | CG13232 | P{TRIP.HMC03532}attP2   |
| 32058  | BBS8          | FBgn0031255 | CG13691 | VDRC.32058              |
| 26215  | bbx           | FBgn0024251 | CG1414  | P{TRIP.JF02113}attP2    |
| 3852   | bc10          | FBgn0040239 | CG4867  | VDRC.3852               |
| 26676  | BCAS2         | FBgn0039558 | CG4980  | VDRC.26676              |
| 33886  | bcd           | FBgn0000166 | CG1034  | P{TRIP.HMS00824}attP2   |
| 42517  | bchs          | FBgn0043362 | CG14001 | P{TRIP.HM.J02083}attP40 |
| 45028  | bchs          | FBgn0043362 | CG14001 | VDRC.45028              |
| 43184  | BCL7-like     | FBgn0026149 | CG17252 | P{TRIP.GL01528}attP40   |
| 106827 | bcn92         | FBgn0013432 | CG3717  | VDRC.106827             |
| 44375  | bdg           | FBgn0034049 | CG8291  | VDRC.44375              |
| 9129   | be            | FBgn0052594 | CG32594 | VDRC.9129               |
| 29734  | BEAF-32       | FBgn0015602 | CG10159 | P{TRIP.HM05202}attP2    |
| 53306  | beag          | FBgn0037660 | CG18005 | P{TRIP.HMC03533}attP2   |
| 4544   | beat-la       | FBgn0013433 | CG4846  | VDRC.4544               |
| 105368 | beat-lb       | FBgn0028645 | CG7644  | VDRC.105368             |
| 105066 | beat-lc       | FBgn0028644 | CG4838  | VDRC.105066             |
| 28072  | beat-lla      | FBgn0038498 | CG14334 | P{TRIP.JF02909}attP2    |
| 112363 | beat-llb      | FBgn0038494 | CG4135  | VDRC.112363             |
| 45866  | beat-llla     | FBgn0265607 | CG12621 | VDRC.45866              |
| 107521 | beat-lllb     | FBgn0053179 | CG33179 | VDRC.107521             |
| 29607  | beat-lllc     | FBgn0032629 | CG15138 | P{TRIP.JF03286}attP2    |
| 52413  | beat-IV       | FBgn0039089 | CG10152 | VDRC.52413              |
| 35715  | beat-Va       | FBgn0038087 | CG10134 | VDRC.35715              |
| 28758  | beat-Vb       | FBgn0038092 | CG31298 | P{TRIP.JF03186}attP2    |
| 102793 | beat-Vc       | FBgn0038084 | CG14390 | VDRC.102793             |
| 6694   | beat-VI       | FBgn0039584 | CG14064 | VDRC.6694               |
| 22725  | beat-VII      | FBgn0250908 | CG42242 | VDRC.22725              |
| 108556 | beg           | FBgn0036691 | CG7842  | VDRC.108556             |
| 28049  | bel           | FBgn0000171 | CG9748  | P{TRIP.JF02884}attP2    |
| 7266   | Bem46         | FBgn0025109 | CG18642 | VDRC.7266               |
| 28721  | ben           | FBgn0000173 | CG18319 | P{TRIP.JF03148}attP2    |
| 5963   | Best1         | FBgn0040238 | CG6264  | VDRC.5963               |
| 42654  | Best2         | FBgn0035696 | CG10173 | P{TRIP.HMS02490}attP2   |
| 39040  | Best3         | FBgn0036492 | CG12327 | P{TRIP.HMS01960}attP40  |
| 8372   | Best3         | FBgn0036492 | CG12327 | VDRC.8372               |
| 40897  | Best4         | FBgn0036491 | CG7259  | P{TRIP.HMS02145}attP40  |
| 41927  | Bet1          | FBgn0260857 | CG14084 | P{TRIP.HMS02324}attP40  |
| 58269  | Bet1          | FBgn0260857 | CG14084 | P{TRIP.HM.J22351}attP40 |
| 38302  | Bet3          | FBgn0260859 | CG3911  | P{TRIP.HMS01764}attP40  |
| 38993  | Bet5          | FBgn0260860 | CG1359  | P{TRIP.HMS01909}attP40  |
| 38533  | beta-Spec     | FBgn0250788 | CG5870  | P{TRIP.HMS01746}attP40  |
| 36113  | beta'Cop      | FBgn0025724 | CG6699  | P{TRIP.HMS01038}attP2   |
| 31562  | beta3GalTII   | FBgn0033315 | CG8734  | P{TRIP.JF01134}attP2    |
| 4869   | beta4GalNAcTA | FBgn0027538 | CG8536  | VDRC.4869               |
| 42693  | beta4GalNAcTB | FBgn0039625 | CG14517 | VDRC.42693              |
| 33741  | betaCop       | FBgn0008635 | CG6223  | P{TRIP.HMS01079}attP2   |
| 34687  | betaggt-I     | FBgn0015000 | CG3469  | P{TRIP.HMS01165}attP2   |
| 34902  | betaggt-II    | FBgn0028970 | CG18627 | P{TRIP.HMS01247}attP2   |
| 50516  | betaggt-II    | FBgn0028970 | CG18627 | P{TRIP.GLC01634}attP40  |
| 28601  | betalnt-nu    | FBgn0010395 | CG1762  | P{TRIP.HM05089}attP2    |
| 42944  | betaNACtes1   | FBgn0030538 | CG13402 | P{TRIP.HMS02637}attP40  |
| 53906  | betaNACtes4   | FBgn0030566 | CG18313 | P{TRIP.HM.J21236}attP40 |
| 109386 | betaNACtes6   | FBgn0052598 | CG32598 | VDRC.109386             |
| 102898 | betaTry       | FBgn0010357 | CG18211 | VDRC.102898             |
| 35815  | betaTub56D    | FBgn0003887 | CG9277  | P{TRIP.GL00380}attP2    |
| 102052 | betaTub60D    | FBgn0003888 | CG3401  | VDRC.102052             |
| 109590 | betaTub85D    | FBgn0003889 | CG9359  | VDRC.109590             |

|        |             |             |         |                        |
|--------|-------------|-------------|---------|------------------------|
| 105075 | betaTub97EF | FBgn0003890 | CG4869  | VDRC.105075            |
| 34813  | BG4         | FBgn0038928 | CG12297 | P{TRiP.HMS00123}attP2  |
| 56001  | BG642163    | FBgn0083938 | CG34102 | P{TRiP.HMC04297}attP40 |
| 109751 | BG642167    | FBgn0250831 | CG34103 | VDRC.109751            |
| 105195 | BG642312    | FBgn0047334 | CG33943 | VDRC.105195            |
| 26213  | Bgb         | FBgn0013753 | CG7959  | P{TRiP.JF02111}attP2   |
| 36636  | bgcn        | FBgn0004581 | CG30170 | P{TRiP.GL00596}attP40  |
| 25590  | bgcn        | FBgn0004581 | CG30170 | VDRC.25590             |
| 28639  | bgm         | FBgn0027348 | CG4501  | P{TRiP.JF03054}attP2   |
| 38248  | BHD         | FBgn0261111 | CG8616  | VDRC.38248             |
| 106087 | BHD         | FBgn0261111 | CG8616  | VDRC.106087            |
| 28341  | bi          | FBgn0000179 | CG3578  | P{TRiP.JF02976}attP2   |
| 37108  | BI-1        | FBgn0035871 | CG7188  | VDRC.37108             |
| 3235   | BI-1        | FBgn0035871 | CG7188  | VDRC.3235              |
| 27691  | bib         | FBgn0000180 | CG4722  | P{TRiP.JF02771}attP2   |
| 34790  | bic         | FBgn0000181 | CG3644  | P{TRiP.HMS00099}attP2  |
| 34997  | BicC        | FBgn0000182 | CG4824  | P{TRiP.HMS01407}attP2  |
| 35631  | BicC        | FBgn0000182 | CG4824  | P{TRiP.GL00478}attP40  |
| 42929  | BicD        | FBgn0000183 | CG6605  | P{TRiP.HMS02622}attP40 |
| 28372  | bif         | FBgn0014133 | CG1822  | P{TRiP.JF03009}attP2   |
| 42559  | bigmax      | FBgn0039509 | CG3350  | P{TRiP.HMJ02215}attP40 |
| 33956  | Bili        | FBgn0039282 | CG11848 | P{TRiP.HMS00911}attP2  |
| 34718  | bin         | FBgn0045759 | CG18647 | P{TRiP.HMS01197}attP2  |
| 31048  | Bin1        | FBgn0024491 | CG6046  | P{TRiP.JF01496}attP2   |
| 50634  | bin3        | FBgn0263144 | CG8276  | P{TRiP.HMC03032}attP2  |
| 51427  | bin3        | FBgn0263144 | CG8276  | P{TRiP.HMC02940}attP40 |
| 26104  | bip1        | FBgn0026263 | CG7574  | VDRC.26104             |
| 43174  | bip2        | FBgn0026262 | CG2009  | P{TRiP.GL01516}attP2   |
| 31629  | Bka         | FBgn0010520 | CG4539  | P{TRiP.JF01415}attP2   |
| 33667  | blanks      | FBgn0035608 | CG10630 | P{TRiP.HMS00078}attP2  |
| 36634  | Blimp-1     | FBgn0035625 | CG5249  | P{TRiP.GL00594}attP2   |
| 25567  | Blos1       | FBgn0050077 | CG30077 | VDRC.25567             |
| 107449 | Blos2       | FBgn0036118 | CG14145 | VDRC.107449            |
| 24851  | Blos4       | FBgn0036105 | CG14149 | VDRC.24851             |
| 5296   | blot        | FBgn0027660 | CG3897  | VDRC.5296              |
| 15817  | blow        | FBgn0004133 | CG1363  | VDRC.15817             |
| 13794  | blp         | FBgn0038387 | CG5268  | VDRC.13794             |
| 28059  | blw         | FBgn0011211 | CG3612  | P{TRiP.JF02896}attP2   |
| 40885  | BM-40-SPARC | FBgn0026562 | CG6378  | P{TRiP.HMS02133}attP40 |
| 37498  | Bmcp        | FBgn0036199 | CG7314  | P{TRiP.HMS01640}attP40 |
| 25926  | bmm         | FBgn0036449 | CG5295  | P{TRiP.JF01946}attP2   |
| 102160 | bnk         | FBgn0004389 | CG1480  | VDRC.102160            |
| 34572  | bnl         | FBgn0014135 | CG4608  | P{TRiP.HMS01046}attP2  |
| 109357 | BobA        | FBgn0040487 | CG12487 | VDRC.109357            |
| 28029  | boca        | FBgn0004132 | CG30498 | P{TRiP.JF02863}attP2   |
| 38349  | bocksbeutel | FBgn0037719 | CG9424  | P{TRiP.HMS01817}attP40 |
| 3060   | boi         | FBgn0040388 | CG32796 | VDRC.3060              |
| 21536  | bol         | FBgn0011206 | CG4760  | VDRC.21536             |
| 33715  | boly        | FBgn0050362 | CG30362 | VDRC.33715             |
| 37515  | bon         | FBgn0023097 | CG5206  | P{TRiP.HMS01657}attP40 |
| 34676  | bond        | FBgn0260942 | CG6921  | P{TRiP.HMS01154}attP2  |
| 104412 | bonsai      | FBgn0026261 | CG4207  | VDRC.104412            |
| 22444  | bor         | FBgn0040237 | CG6815  | VDRC.22444             |
| 35132  | bora        | FBgn0259791 | CG6897  | VDRC.35132             |
| 34848  | borr        | FBgn0032105 | CG4454  | VDRC.34848             |
| 4366   | boss        | FBgn0000206 | CG8285  | VDRC.4366              |
| 37186  | botv        | FBgn0027535 | CG15110 | VDRC.37186             |
| 5443   | bou         | FBgn0261284 | CG14430 | VDRC.5443              |
| 27074  | bowl        | FBgn0004893 | CG10021 | P{TRiP.JF02419}attP2   |
| 18150  | BoYb        | FBgn0037205 | CG11133 | VDRC.18150             |
| 33641  | br          | FBgn0283451 | CG11491 | P{TRiP.HMS00042}attP2  |
| 42502  | Br140       | FBgn0033155 | CG1845  | P{TRiP.HMJ02067}attP40 |
| 34646  | brat        | FBgn0010300 | CG10719 | P{TRiP.HMS01121}attP2  |
| 39957  | Brca2       | FBgn0050169 | CG30169 | VDRC.39957             |
| 107929 | Brd         | FBgn0000216 | CG3096  | VDRC.107929            |
| 42658  | Brd8        | FBgn0039654 | CG14514 | P{TRiP.HMS02494}attP2  |
| 28019  | Bre1        | FBgn0086694 | CG10542 | P{TRiP.JF02853}attP2   |
| 29321  | Brf         | FBgn0038499 | CG31256 | P{TRiP.JF02482}attP2   |

|        |            |             |         |                         |
|--------|------------|-------------|---------|-------------------------|
| 51789  | brk        | FBgn0024250 | CG9653  | P(TRIP.HMC03345)attP2   |
| 34520  | brm        | FBgn0000212 | CG5942  | P(TRIP.HMS00050)attP2   |
| 55386  | brn        | FBgn0000221 | CG4934  | P(TRIP.HMC04074)attP40  |
| 50689  | Bro        | FBgn0013755 | CG7960  | P(TRIP.HMC03090)attP2   |
| 25891  | brp        | FBgn0259246 | CG42344 | P(TRIP.JF01932)attP2    |
| 31382  | bru        | FBgn0261787 | CG2478  | P(TRIP.JF01352)attP2    |
| 50631  | bru-2      | FBgn0262475 | CG43065 | P(TRIP.HMC02998)attP2   |
| 51730  | bru-3      | FBgn0264001 | CG43744 | P(TRIP.HMC03283)attP2   |
| 51814  | Bruce      | FBgn0266717 | CG6303  | P(TRIP.HMC03385)attP2   |
| 31496  | brv1       | FBgn0036874 | CG9472  | P(TRIP.JF02078)attP2    |
| 31670  | brv2       | FBgn0036712 | CG16793 | P(TRIP.JF01463)attP2    |
| 33763  | brv3       | FBgn0040333 | CG13762 | P(TRIP.JF02462)attP2    |
| 33421  | BRWD3      | FBgn0011785 | CG31132 | P(TRIP.HMS00304)attP2   |
| 26755  | bs         | FBgn0004101 | CG3411  | P(TRIP.JF02319)attP2    |
| 34550  | bsf        | FBgn0284256 | CG10302 | P(TRIP.HMS01022)attP2   |
| 2789   | Bsg        | FBgn0261822 | CG31605 | VDRC.2789               |
| 37838  | Bsg25A     | FBgn0000227 | CG12205 | VDRC.37838              |
| 36828  | Bsg25D     | FBgn0000228 | CG14025 | P(TRIP.GL01064)attP2    |
| 29336  | bsh        | FBgn0000529 | CG10604 | P(TRIP.JF02498)attP2    |
| 32977  | bsk        | FBgn0000229 | CG5680  | P(TRIP.HMS00777)attP2   |
| 31323  | bsk        | FBgn0000229 | CG5680  | P(TRIP.JF01275)attP2    |
| 31545  | bt         | FBgn0005666 | CG32019 | P(TRIP.JF01107)attP2    |
| 28912  | BtbVII     | FBgn0263108 | CG43365 | P(TRIP.HM05123)attP2    |
| 29453  | btd        | FBgn0000233 | CG12653 | P(TRIP.JF03389)attP2    |
| 27075  | Bteb2      | FBgn0025679 | CG2932  | P(TRIP.JF02420)attP2    |
| 43267  | BthD       | FBgn0030501 | CG11177 | P(TRIP.GL01456)attP2    |
| 25791  | Btk29A     | FBgn0003502 | CG8049  | P(TRIP.JF01797)attP2    |
| 22675  | Btk29A     | FBgn0003502 | CG8049  | VDRC.22675              |
| 40871  | btl        | FBgn0285896 | CG32134 | P(TRIP.HMS02038)attP2   |
| 42530  | btn        | FBgn0014949 | CG5264  | P(TRIP.HM.J02097)attP40 |
| 50658  | btn        | FBgn0014949 | CG5264  | VDRC.50658              |
| 106976 | Btnd       | FBgn0029848 | CG3599  | VDRC.106976             |
| 16663  | Btnd       | FBgn0029848 | CG3599  | VDRC.16663              |
| 60020  | Btnd       | FBgn0029848 | CG3599  | P(TRIP.HMC05012)attP2   |
| 40898  | btsz       | FBgn0266756 | CG44012 | P(TRIP.HMS02146)attP40  |
| 28373  | btv        | FBgn0023096 | CG15148 | P(TRIP.JF03010)attP2    |
| 30482  | btz        | FBgn0045862 | CG12878 | P(TRIP.HM05220)attP2    |
| 35260  | Bub1       | FBgn0031696 | CG14030 | P(TRIP.GL00151)attP2    |
| 40910  | Bub3       | FBgn0025457 | CG7581  | P(TRIP.HMS02158)attP40  |
| 35329  | BubR1      | FBgn0263855 | CG7838  | P(TRIP.GL00236)attP2    |
| 35700  | BubR1      | FBgn0263855 | CG7838  | P(TRIP.GLV21065)attP2   |
| 35742  | Buffy      | FBgn0040491 | CG8238  | P(TRIP.HMS01484)attP2   |
| 28322  | bun        | FBgn0259176 | CG42281 | P(TRIP.JF02954)attP2    |
| 34889  | bur        | FBgn0000239 | CG9242  | P(TRIP.HMS01234)attP2   |
| 26719  | burs       | FBgn0038901 | CG13419 | P(TRIP.JF02260)attP2    |
| 30894  | bves       | FBgn0031150 | CG32513 | VDRC.30894              |
| 101584 | bw         | FBgn0000241 | CG17632 | VDRC.101584             |
| 36765  | bwa        | FBgn0045064 | CG13969 | P(TRIP.HMS03026)attP2   |
| 29454  | Bx         | FBgn0265598 | CG44425 | P(TRIP.JF03390)attP2    |
| 34777  | Bx42       | FBgn0004856 | CG8264  | P(TRIP.HMS00086)attP2   |
| 57550  | bxd        | FBgn0020556 | CR31273 | P(TRIP.HMC04867)attP40  |
| 38288  | by         | FBgn0000244 | CG9379  | P(TRIP.HMS01743)attP2   |
| 50906  | byn        | FBgn0011723 | CG7260  | P(TRIP.HM.J03127)attP40 |
| 34876  | bys        | FBgn0010292 | CG1430  | P(TRIP.HMS00196)attP2   |
| 9282   | c-cup      | FBgn0031367 | CG15623 | VDRC.9282               |
| 43977  | c(2)M      | FBgn0028525 | CG4249  | P(TRIP.GL01587)attP2    |
| 21306  | c(3)G      | FBgn0000246 | CG17604 | VDRC.21306              |
| 31652  | c11.1      | FBgn0040236 | CG12132 | VDRC.31652              |
| 34952  | c12.1      | FBgn0040235 | CG12135 | P(TRIP.HMS00382)attP2   |
| 17035  | c12.2      | FBgn0040234 | CG12149 | VDRC.17035              |
| 35018  | C15        | FBgn0004863 | CG7937  | P(TRIP.HMS01431)attP2   |
| 2826   | C1GalTA    | FBgn0032078 | CG9520  | VDRC.2826               |
| 31116  | C3G        | FBgn0259228 | CG42328 | P(TRIP.JF01589)attP2    |
| 103450 | C901       | FBgn0021742 | CG1567  | VDRC.103450             |
| 53888  | ca         | FBgn0000247 | CG31037 | P(TRIP.HM.J21206)attP40 |
| 33413  | Ca-alpha1D | FBgn0001991 | CG4894  | P(TRIP.HMS00294)attP2   |
| 39029  | Ca-alpha1T | FBgn0029846 | CG15899 | P(TRIP.HMS01948)attP40  |
| 29575  | Ca-beta    | FBgn0259822 | CG42403 | P(TRIP.JF03254)attP2    |

|        |          |             |         |                        |
|--------|----------|-------------|---------|------------------------|
| 25928  | Ca-P60A  | FBgn0263006 | CG3725  | P{TRiP.JF01948}attP2   |
| 44581  | Ca-P60A  | FBgn0263006 | CG3725  | P{TRiP.HMS02878}attP2  |
| 43148  | CaBP1    | FBgn0025678 | CG5809  | VDR.C.43148            |
| 27244  | cac      | FBgn0005563 | CG43368 | P{TRiP.JF02572}attP2   |
| 34775  | cact     | FBgn0000250 | CG5848  | P{TRiP.HMS00084}attP2  |
| 32718  | cactin   | FBgn0031114 | CG1676  | VDR.C.32718            |
| 34702  | cad      | FBgn0000251 | CG1759  | P{TRiP.HMS01181}attP2  |
| 27485  | Cad74A   | FBgn0036715 | CG6445  | P{TRiP.JF02635}attP2   |
| 27295  | Cad86C   | FBgn0261053 | CG42601 | P{TRiP.JF02597}attP2   |
| 53314  | Cad86C   | FBgn0261053 | CG42601 | P{TRiP.HMC03543}attP2  |
| 28716  | Cad87A   | FBgn0037963 | CG6977  | P{TRiP.JF03143}attP2   |
| 29303  | Cad88C   | FBgn0038247 | CG3389  | P{TRiP.JF02443}attP2   |
| 26287  | Cad89D   | FBgn0038439 | CG14900 | P{TRiP.JF02056}attP2   |
| 27266  | Cad96Ca  | FBgn0022800 | CG10244 | P{TRiP.JF02579}attP2   |
| 25860  | Cad96Cb  | FBgn0039294 | CG13664 | P{TRiP.JF01881}attP2   |
| 35037  | Cad99C   | FBgn0039709 | CG31009 | P{TRiP.HMS01451}attP2  |
| 41982  | CadN     | FBgn0015609 | CG7100  | P{TRiP.HMS02380}attP2  |
| 40889  | CadN2    | FBgn0262018 | CG42829 | P{TRiP.HMS02137}attP40 |
| 34069  | Caf1     | FBgn0263979 | CG4236  | P{TRiP.HMS00051}attP2  |
| 20270  | Caf1-105 | FBgn0033526 | CG12892 | VDR.C.20270            |
| 32478  | Caf1-180 | FBgn0030054 | CG12109 | P{TRiP.HMS00480}attP2  |
| 28918  | Caf1-180 | FBgn0030054 | CG12109 | P{TRiP.HMS05129}attP2  |
| 103576 | cag      | FBgn0017414 | CG12346 | VDR.C.103576           |
| 104429 | CAH1     | FBgn0027844 | CG7820  | VDR.C.104429           |
| 41836  | CAH2     | FBgn0027843 | CG6906  | P{TRiP.GL01264}attP2   |
| 38612  | CAHbeta  | FBgn0037646 | CG11967 | VDR.C.38612            |
| 41716  | cal1     | FBgn0038478 | CG5148  | P{TRiP.HMS02281}attP2  |
| 29455  | CalpA    | FBgn0012051 | CG7563  | P{TRiP.JF03391}attP2   |
| 25963  | CalpB    | FBgn0025866 | CG8107  | P{TRiP.JF01983}attP2   |
| 45939  | CalpC    | FBgn0260450 | CG3692  | VDR.C.45939            |
| 25839  | calS     | FBgn0039928 | CG11059 | P{TRiP.JF01857}attP2   |
| 28306  | Calx     | FBgn0013995 | CG5685  | P{TRiP.JF02937}attP2   |
| 34609  | Cam      | FBgn0000253 | CG8472  | P{TRiP.HMS01318}attP2  |
| 26726  | CaMKI    | FBgn0016126 | CG1495  | P{TRiP.JF02268}attP2   |
| 29401  | CaMKII   | FBgn0004624 | CG18069 | P{TRiP.JF03336}attP2   |
| 40849  | Camta    | FBgn0259234 | CG42332 | P{TRiP.HMS02016}attP40 |
| 12588  | can      | FBgn0011569 | CG6577  | VDR.C.12588            |
| 42640  | cana     | FBgn0040233 | CG33694 | P{TRiP.HMS02476}attP40 |
| 38966  | CanA-14F | FBgn0030758 | CG9819  | P{TRiP.HMS01880}attP40 |
| 25850  | CanA1    | FBgn0010015 | CG1455  | P{TRiP.JF01871}attP2   |
| 27307  | CanB     | FBgn0010014 | CG4209  | P{TRiP.JF02616}attP2   |
| 38971  | CanB2    | FBgn0015614 | CG11217 | P{TRiP.HMS01886}attP2  |
| 33920  | Cand1    | FBgn0027568 | CG5366  | P{TRiP.HMS00864}attP2  |
| 33431  | Cap      | FBgn0015615 | CG9802  | P{TRiP.HMS00318}attP2  |
| 36663  | CAP      | FBgn0033504 | CG18408 | P{TRiP.HMS01551}attP2  |
| 31478  | CAP-D2   | FBgn0039680 | CG1911  | P{TRiP.JF01280}attP2   |
| 36615  | Cap-D3   | FBgn0051989 | CG31989 | P{TRiP.GL00575}attP2   |
| 38204  | Cap-G    | FBgn0259876 | CG34438 | P{TRiP.GL00643}attP2   |
| 38196  | Cap-H2   | FBgn0037831 | CG14685 | P{TRiP.GL00635}attP2   |
| 28345  | capa     | FBgn0039722 | CG15520 | P{TRiP.JF02981}attP2   |
| 27275  | capaR    | FBgn0037100 | CG14575 | P{TRiP.JF02577}attP2   |
| 13123  | Capr     | FBgn0042134 | CG18811 | VDR.C.13123            |
| 28020  | caps     | FBgn0023095 | CG11282 | P{TRiP.JF02854}attP2   |
| 3046   | caps     | FBgn0023095 | CG11282 | VDR.C.3046             |
| 31984  | Caps     | FBgn0053653 | CG33653 | P{TRiP.JF03418}attP2   |
| 33010  | capt     | FBgn0261458 | CG33979 | P{TRiP.HMS00810}attP2  |
| 32922  | capu     | FBgn0000256 | CG3399  | P{TRiP.HMS00712}attP2  |
| 34007  | car      | FBgn0000257 | CG12230 | P{TRiP.HMS00972}attP2  |
| 28337  | Cas      | FBgn0022213 | CG13281 | P{TRiP.JF02972}attP2   |
| 2929   | Cas      | FBgn0022213 | CG13281 | VDR.C.2929             |
| 34701  | cas      | FBgn0004878 | CG2102  | P{TRiP.HMS01180}attP2  |
| 32857  | CASK     | FBgn0013759 | CG6703  | P{TRiP.HMS00644}attP2  |
| 44027  | casp     | FBgn0034068 | CG8400  | P{TRiP.HMS02742}attP2  |
| 34020  | Cat      | FBgn0000261 | CG6871  | P{TRiP.HMS00990}attP2  |
| 28978  | cathD    | FBgn0029093 | CG1548  | P{TRiP.HMS05189}attP2  |
| 26317  | cato     | FBgn0024249 | CG7760  | P{TRiP.JF02090}attP2   |
| 100095 | Catsup   | FBgn0002022 | CG10449 | VDR.C.100095           |
| 44002  | caup     | FBgn0015919 | CG10605 | P{TRiP.HMS02716}attP2  |

|        |            |             |         |                        |
|--------|------------|-------------|---------|------------------------|
| 15021  | cav        | FBgn0026257 | CG6219  | VDRC.15021             |
| 32990  | caz        | FBgn0011571 | CG3606  | P{TRIP.HMS00790}attP2  |
| 34839  | caz        | FBgn0011571 | CG3606  | P{TRIP.HMS00156}attP2  |
| 20998  | cbc        | FBgn0033842 | CG5970  | VDRC.20998             |
| 27500  | Cbl        | FBgn0020224 | CG7037  | P{TRIP.JF02650}attP2   |
| 22335  | Cbl        | FBgn0020224 | CG7037  | VDRC.22335             |
| 31051  | CBP        | FBgn0026144 | CG1435  | P{TRIP.JF01499}attP2   |
| 42596  | Cbp20      | FBgn0022943 | CG12357 | P{TRIP.HMS02428}attP40 |
| 28302  | Cbp53E     | FBgn0004580 | CG6702  | P{TRIP.JF02933}attP2   |
| 33648  | Cbp80      | FBgn0022942 | CG7035  | P{TRIP.HMS00052}attP2  |
| 36767  | Cbs        | FBgn0031148 | CG1753  | P{TRIP.HMS03028}attP2  |
| 21959  | cbs        | FBgn0086757 | CG4840  | VDRC.21959             |
| 38276  | cbt        | FBgn0043364 | CG4427  | P{TRIP.HMS01726}attP40 |
| 16078  | cbx        | FBgn0011241 | CG10536 | VDRC.16078             |
| 17178  | Cby        | FBgn0067317 | CG13415 | VDRC.17178             |
| 29569  | Ccap       | FBgn0039007 | CG4910  | P{TRIP.JF03248}attP2   |
| 31490  | CcapR      | FBgn0039396 | CG33344 | P{TRIP.JF01338}attP2   |
| 46741  | CCHa1      | FBgn0038199 | CG14358 | VDRC.46741             |
| 27669  | CCHa1r     | FBgn0050106 | CG30106 | P{TRIP.JF02748}attP2   |
| 12830  | CCHa2      | FBgn0038147 | CG14375 | VDRC.12830             |
| 25855  | CCHa2r     | FBgn0033058 | CG14593 | P{TRIP.JF01876}attP2   |
| 45020  | Cchl       | FBgn0038925 | CG6022  | VDRC.45020             |
| 27494  | CCKLR-17D1 | FBgn0259231 | CG42301 | P{TRIP.JF02644}attP2   |
| 28333  | CCKLR-17D3 | FBgn0030954 | CG32540 | P{TRIP.JF02968}attP2   |
| 53283  | Ccm3       | FBgn0038331 | CG5073  | P{TRIP.HMC03499}attP40 |
| 41913  | Ccn        | FBgn0052183 | CG32183 | P{TRIP.HMS02310}attP2  |
| 54821  | Ccp84Af    | FBgn0004778 | CG1331  | P{TRIP.HMJ21540}attP40 |
| 53256  | Ccs        | FBgn0010531 | CG17753 | P{TRIP.GLC01816}attP2  |
| 100575 | Cct1       | FBgn0041342 | CG1049  | VDRC.100575            |
| 34070  | Cct1       | FBgn0041342 | CG1049  | VDRC.34070             |
| 105794 | Cct2       | FBgn0035231 | CG18330 | VDRC.105794            |
| 41818  | Cct5       | FBgn0010621 | CG8439  | P{TRIP.GL01246}attP2   |
| 34969  | Cctgamma   | FBgn0015019 | CG8977  | P{TRIP.HMS00884}attP2  |
| 18479  | Ccz1       | FBgn0035470 | CG14980 | VDRC.18479             |
| 2852   | CD98hc     | FBgn0037533 | CG2791  | VDRC.2852              |
| 58082  | Cda4       | FBgn0052499 | CG32499 | P{TRIP.HMJ21974}attP40 |
| 55996  | Cda5       | FBgn0051973 | CG31973 | P{TRIP.HMC04292}attP40 |
| 36764  | CDase      | FBgn0039774 | CG1471  | P{TRIP.HMS03025}attP2  |
| 103627 | cdc14      | FBgn0031952 | CG7134  | VDRC.103627            |
| 22419  | Cdc16      | FBgn0025781 | CG6759  | VDRC.22419             |
| 40950  | cdc2       | FBgn0004106 | CG5363  | P{TRIP.HMS02212}attP2  |
| 31735  | cdc23      | FBgn0032863 | CG2508  | P{TRIP.HM04044}attP2   |
| 31716  | Cdc27      | FBgn0012058 | CG8610  | P{TRIP.HM04024}attP2   |
| 36128  | cdc2c      | FBgn0004107 | CG10498 | P{TRIP.HMS01543}attP40 |
| 35267  | cdc2c      | FBgn0004107 | CG10498 | P{TRIP.GL00162}attP2   |
| 42661  | cdc2rk     | FBgn0013435 | CG1362  | P{TRIP.HMS02497}attP40 |
| 42661  | cdc2rk     | FBgn0013435 | CG1362  | P{TRIP.HMS02497}attP40 |
| 34991  | Cdc37      | FBgn0011573 | CG12019 | P{TRIP.HMS01401}attP2  |
| 35756  | Cdc42      | FBgn0010341 | CG12530 | P{TRIP.HMS01502}attP40 |
| 20705  | CDc45L     | FBgn0026143 | CG3658  | VDRC.20705             |
| 44524  | Cdc5       | FBgn0265574 | CG6905  | P{TRIP.HMC02918}attP2  |
| 55734  | Cdc6       | FBgn0035918 | CG5971  | P{TRIP.HMC03802}attP40 |
| 31168  | Cdep       | FBgn0265082 | CG44193 | P{TRIP.JF01661}attP2   |
| 38279  | CdGAPr     | FBgn0032821 | CG10538 | P{TRIP.HMS01730}attP40 |
| 42568  | cdi        | FBgn0004876 | CG6027  | P{TRIP.HMJ02227}attP40 |
| 34838  | Cdk12      | FBgn0037093 | CG7597  | P{TRIP.HMS00155}attP2  |
| 27714  | Cdk4       | FBgn0016131 | CG5072  | P{TRIP.JF02795}attP2   |
| 27517  | Cdk5       | FBgn0013762 | CG8203  | P{TRIP.JF02667}attP2   |
| 27048  | Cdk5alpha  | FBgn0027491 | CG5387  | P{TRIP.JF02374}attP2   |
| 35199  | Cdk7       | FBgn0263237 | CG3319  | P{TRIP.GL00073}attP2   |
| 35324  | Cdk8       | FBgn0015618 | CG10572 | P{TRIP.GL00231}attP2   |
| 45370  | Cdk8       | FBgn0015618 | CG10572 | VDRC.45370             |
| 34982  | Cdk9       | FBgn0019949 | CG5179  | P{TRIP.HMS01391}attP2  |
| 41932  | Cdk9       | FBgn0019949 | CG5179  | P{TRIP.HMS02329}attP40 |
| 42862  | Cdlic2     | FBgn0026141 | CG5450  | P{TRIP.HMS02554}attP40 |
| 31639  | cdm        | FBgn0261532 | CG7212  | P{TRIP.JF01428}attP2   |
| 28075  | CdsA       | FBgn0010350 | CG7962  | P{TRIP.JF02912}attP2   |
| 9710   | CecA1      | FBgn0000276 | CG1365  | VDRC.9710              |



|        |         |             |         |                         |
|--------|---------|-------------|---------|-------------------------|
| 9714   | CecA2   | FBgn0000277 | CG1367  | VDR.C.9714              |
| 103148 | CecB    | FBgn0000278 | CG1878  | VDR.C.103148            |
| 50602  | CecC    | FBgn0000279 | CG1373  | P{TRiP.GL.C01724}attP2  |
| 36097  | Ced-12  | FBgn0032409 | CG5336  | P{TRiP.GL.00516}attP40  |
| 58153  | Ced-12  | FBgn0032409 | CG5336  | P{TRiP.HM.J22104}attP40 |
| 102556 | ced-6   | FBgn0029092 | CG11804 | VDR.C.102556            |
| 43139  | Cen     | FBgn0032876 | CG1962  | P{TRiP.GL.01480}attP2   |
| 31147  | cenB1A  | FBgn0039056 | CG6742  | P{TRiP.JF.01622}attP2   |
| 27738  | cenB1A  | FBgn0039056 | CG6742  | VDR.C.27738             |
| 31228  | cenG1A  | FBgn0028509 | CG31811 | P{TRiP.JF.01807}attP2   |
| 34692  | Cenp-C  | FBgn0266916 | CG31258 | P{TRiP.HMS01171}attP2   |
| 101132 | Cep89   | FBgn0266708 | CG8214  | VDR.C.101132            |
| 34773  | Cep97   | FBgn0031575 | CG3980  | VDR.C.34773             |
| 103357 | Cep97   | FBgn0031575 | CG3980  | VDR.C.103357            |
| 25875  | cer     | FBgn0034443 | CG10460 | P{TRiP.JF.01914}attP2   |
| 35361  | Cerk    | FBgn0037315 | CG16708 | P{TRiP.GL.00273}attP2   |
| 35579  | cert    | FBgn0027569 | CG7207  | P{TRiP.GL.00157}attP2   |
| 103221 | cerv    | FBgn0030657 | CG15645 | VDR.C.103221            |
| 103664 | Cf2     | FBgn0000286 | CG11924 | VDR.C.103664            |
| 47221  | Cfp1    | FBgn0030121 | CG17446 | VDR.C.47221             |
| 34668  | cg      | FBgn0000289 | CG8367  | P{TRiP.HMS01145}attP2   |
| 29359  | cg      | FBgn0000289 | CG8367  | P{TRiP.JF.02523}attP2   |
| 51174  | CG10005 | FBgn0037972 | CG10005 | P{TRiP.HM.J21137}attP40 |
| 55376  | CG10006 | FBgn0036461 | CG10006 | P{TRiP.HM.C04064}attP40 |
| 45095  | CG10011 | FBgn0039590 | CG10011 | VDR.C.45095             |
| 58095  | CG10014 | FBgn0038000 | CG10014 | P{TRiP.HM.J22010}attP40 |
| 16583  | CG10029 | FBgn0037498 | CG10029 | VDR.C.16583             |
| 44501  | CG10032 | FBgn0037493 | CG10032 | P{TRiP.HM.C02437}attP2  |
| 54039  | CG10038 | FBgn0038013 | CG10038 | P{TRiP.HM.J21482}attP40 |
| 57191  | CG10041 | FBgn0038014 | CG10041 | P{TRiP.HM.C04573}attP40 |
| 43140  | CG10050 | FBgn0037492 | CG10050 | P{TRiP.GL.01481}attP2   |
| 17972  | CG10053 | FBgn0037490 | CG10053 | VDR.C.17972             |
| 17973  | CG10055 | FBgn0037482 | CG10055 | VDR.C.17973             |
| 50970  | CG10062 | FBgn0034439 | CG10062 | P{TRiP.HM.J21076}attP40 |
| 38323  | CG10064 | FBgn0035724 | CG10064 | VDR.C.38323             |
| 15948  | CG10068 | FBgn0037473 | CG10068 | VDR.C.15948             |
| 50067  | CG10075 | FBgn0035722 | CG10075 | VDR.C.50067             |
| 32388  | CG10077 | FBgn0035720 | CG10077 | P{TRiP.HMS00380}attP2   |
| 32981  | CG10077 | FBgn0035720 | CG10077 | P{TRiP.HMS00781}attP2   |
| 33717  | CG10082 | FBgn0034644 | CG10082 | P{TRiP.HM.S00598}attP2  |
| 38282  | CG10083 | FBgn0036372 | CG10083 | P{TRiP.HMS01735}attP40  |
| 57309  | CG10089 | FBgn0036369 | CG10089 | P{TRiP.HM.S04510}attP40 |
| 53275  | CG10092 | FBgn0037526 | CG10092 | P{TRiP.HM.C03491}attP40 |
| 34979  | CG10103 | FBgn0035715 | CG10103 | P{TRiP.HM.S01388}attP2  |
| 13969  | CG10104 | FBgn0033933 | CG10104 | VDR.C.13969             |
| 32389  | CG10107 | FBgn0035713 | CG10107 | P{TRiP.HM.S00383}attP2  |
| 55952  | CG10116 | FBgn0036367 | CG10116 | P{TRiP.HM.C04241}attP40 |
| 57780  | CG10126 | FBgn0038088 | CG10126 | P{TRiP.HM.C04974}attP40 |
| 31992  | CG10132 | FBgn0032798 | CG10132 | P{TRiP.JF.03427}attP2   |
| 33701  | CG10133 | FBgn0036366 | CG10133 | P{TRiP.HM.S00578}attP2  |
| 18014  | CG10133 | FBgn0036366 | CG10133 | VDR.C.18014             |
| 28730  | CG10137 | FBgn0032800 | CG10137 | P{TRiP.JF.03157}attP2   |
| 18019  | CG10144 | FBgn0035704 | CG10144 | VDR.C.18019             |
| 31943  | CG10147 | FBgn0035702 | CG10147 | P{TRiP.JF.02234}attP2   |
| 28304  | CG10151 | FBgn0033960 | CG10151 | P{TRiP.JF.02935}attP2   |
| 50557  | CG10153 | FBgn0033962 | CG10153 | P{TRiP.GL.C01677}attP2  |
| 55971  | CG10154 | FBgn0036361 | CG10154 | P{TRiP.HM.C04266}attP40 |
| 50938  | CG10157 | FBgn0039099 | CG10157 | P{TRiP.HM.J21033}attP40 |
| 32959  | CG10163 | FBgn0035697 | CG10163 | P{TRiP.HM.S00754}attP2  |
| 28377  | CG10164 | FBgn0039088 | CG10164 | P{TRiP.JF.03014}attP2   |
| 50713  | CG10166 | FBgn0032799 | CG10166 | P{TRiP.HM.S02947}attP40 |
| 31717  | CG10168 | FBgn0039087 | CG10168 | P{TRiP.HM.04025}attP2   |
| 1141   | CG10170 | FBgn0039085 | CG10170 | VDR.C.1141              |
| 44457  | CG10171 | FBgn0036353 | CG10171 | P{TRiP.GL.C01609}attP2  |
| 25945  | CG10177 | FBgn0039083 | CG10177 | P{TRiP.JF.01965}attP2   |
| 42657  | CG10178 | FBgn0032684 | CG10178 | P{TRiP.HM.S02493}attP2  |
| 18135  | CG10185 | FBgn0038397 | CG10185 | VDR.C.18135             |
| 110223 | CG10185 | FBgn0038397 | CG10185 | VDR.C.110223            |

|        |         |             |         |                        |
|--------|---------|-------------|---------|------------------------|
| 38942  | CG10188 | FBgn0032796 | CG10188 | P(TRIP.HMS01856)attP40 |
| 52087  | CG10189 | FBgn0032793 | CG10189 | VDRC.52087             |
| 41170  | CG10194 | FBgn0032790 | CG10194 | VDRC.41170             |
| 26771  | CG10195 | FBgn0032787 | CG10195 | VDRC.26771             |
| 28759  | CG10200 | FBgn0033968 | CG10200 | P(TRIP.JF03187)attP2   |
| 9427   | CG10202 | FBgn0033969 | CG10202 | VDRC.9427              |
| 28640  | CG10205 | FBgn0033970 | CG10205 | P(TRIP.JF03055)attP2   |
| 57255  | CG10209 | FBgn0033971 | CG10209 | P(TRIP.HMC04647)attP40 |
| 18035  | CG10214 | FBgn0039115 | CG10214 | VDRC.18035             |
| 101393 | CG10214 | FBgn0039115 | CG10214 | VDRC.101393            |
| 26776  | CG10219 | FBgn0039112 | CG10219 | VDRC.26776             |
| 18037  | CG10222 | FBgn0036356 | CG10222 | VDRC.18037             |
| 108196 | CG10226 | FBgn0035695 | CG10226 | VDRC.108196            |
| 52891  | CG10232 | FBgn0039108 | CG10232 | P(TRIP.HMC03629)attP40 |
| 108388 | CG10237 | FBgn0032783 | CG10237 | VDRC.108388            |
| 33432  | CG10249 | FBgn0027596 | CG10249 | P(TRIP.HMS00319)attP2  |
| 34350  | CG10253 | FBgn0033983 | CG10253 | P(TRIP.HMS01339)attP2  |
| 3321   | CG10253 | FBgn0033983 | CG10253 | VDRC.3321              |
| 51687  | CG10254 | FBgn0027512 | CG10254 | P(TRIP.GLC01787)attP40 |
| 45208  | CG10257 | FBgn0033985 | CG10257 | VDRC.45208             |
| 107744 | CG10257 | FBgn0033985 | CG10257 | VDRC.107744            |
| 37672  | CG10262 | FBgn0032813 | CG10262 | VDRC.37672             |
| 57192  | CG10264 | FBgn0038394 | CG10264 | P(TRIP.HMC04574)attP40 |
| 43294  | CG10265 | FBgn0033990 | CG10265 | P(TRIP.HMS02667)attP40 |
| 50955  | CG10268 | FBgn0032811 | CG10268 | P(TRIP.HMJ21057)attP40 |
| 26239  | CG10274 | FBgn0035690 | CG10274 | P(TRIP.JF02137)attP2   |
| 7518   | CG10277 | FBgn0037442 | CG10277 | VDRC.7518              |
| 101168 | CG10283 | FBgn0032681 | CG10283 | VDRC.101168            |
| 16003  | CG10286 | FBgn0037439 | CG10286 | VDRC.16003             |
| 34579  | CG10289 | FBgn0035688 | CG10289 | P(TRIP.HMS01053)attP2  |
| 44493  | CG10306 | FBgn0034654 | CG10306 | P(TRIP.HMC02415)attP2  |
| 8837   | CG10320 | FBgn0034645 | CG10320 | VDRC.8837              |
| 26764  | CG10321 | FBgn0034643 | CG10321 | P(TRIP.JF02328)attP2   |
| 31226  | CG10324 | FBgn0038454 | CG10324 | VDRC.31226             |
| 36065  | CG10326 | FBgn0038453 | CG10326 | P(TRIP.GL00423)attP2   |
| 47194  | CG10326 | FBgn0038453 | CG10326 | VDRC.47194             |
| 34857  | CG10333 | FBgn0032690 | CG10333 | P(TRIP.HMS00175)attP2  |
| 44459  | CG10336 | FBgn0032698 | CG10336 | P(TRIP.GLC01611)attP2  |
| 53913  | CG10338 | FBgn0032700 | CG10338 | P(TRIP.HMJ21246)attP40 |
| 3609   | CG10339 | FBgn0034972 | CG10339 | VDRC.3609              |
| 16020  | CG10340 | FBgn0022344 | CG10340 | VDRC.16020             |
| 41653  | CG10341 | FBgn0032701 | CG10341 | P(TRIP.GL01235)attP2   |
| 38380  | CG10343 | FBgn0032703 | CG10343 | VDRC.38380             |
| 42505  | CG10344 | FBgn0034729 | CG10344 | P(TRIP.HMJ02070)attP40 |
| 51751  | CG10345 | FBgn0027562 | CG10345 | P(TRIP.HMC03302)attP2  |
| 16025  | CG10347 | FBgn0030342 | CG10347 | VDRC.16025             |
| 27076  | CG10348 | FBgn0032707 | CG10348 | P(TRIP.JF02421)attP2   |
| 5550   | CG10353 | FBgn0030349 | CG10353 | VDRC.5550              |
| 53316  | CG10359 | FBgn0035452 | CG10359 | P(TRIP.HMC03545)attP2  |
| 44512  | CG10361 | FBgn0036208 | CG10361 | P(TRIP.HMC02902)attP2  |
| 16036  | CG10365 | FBgn0039109 | CG10365 | VDRC.16036             |
| 26765  | CG10366 | FBgn0032814 | CG10366 | P(TRIP.JF02329)attP2   |
| 101460 | CG10375 | FBgn0039116 | CG10375 | VDRC.101460            |
| 41907  | CG10376 | FBgn0032702 | CG10376 | P(TRIP.HMS02300)attP2  |
| 35473  | CG10376 | FBgn0032702 | CG10376 | VDRC.35473             |
| 33911  | CG10383 | FBgn0032699 | CG10383 | VDRC.33911             |
| 16045  | CG10384 | FBgn0034731 | CG10384 | VDRC.16045             |
| 104941 | CG10384 | FBgn0034731 | CG10384 | VDRC.104941            |
| 43261  | CG10395 | FBgn0033019 | CG10395 | P(TRIP.GLC01450)attP2  |
| 1482   | CG10396 | FBgn0033020 | CG10396 | VDRC.1482              |
| 51861  | CG10399 | FBgn0031877 | CG10399 | P(TRIP.HMC03435)attP40 |
| 43171  | CG10405 | FBgn0038431 | CG10405 | VDRC.43171             |
| 42636  | CG10407 | FBgn0038395 | CG10407 | P(TRIP.HMS02472)attP40 |
| 52921  | CG1041  | FBgn0037440 | CG1041  | P(TRIP.HMC03661)attP40 |
| 38364  | CG10413 | FBgn0032689 | CG10413 | P(TRIP.HMS01833)attP2  |
| 39051  | CG10417 | FBgn0033021 | CG10417 | P(TRIP.HMS01971)attP2  |
| 27259  | CG10417 | FBgn0033021 | CG10417 | VDRC.27259             |
| 30490  | CG10418 | FBgn0036277 | CG10418 | P(TRIP.HM05232)attP2   |

|        |         |             |         |                        |
|--------|---------|-------------|---------|------------------------|
| 33968  | CG10420 | FBgn0039296 | CG10420 | P{TRiP.HMS00925}attP2  |
| 39667  | CG10424 | FBgn0036848 | CG10424 | VDRC.39667             |
| 6734   | CG10425 | FBgn0039304 | CG10425 | VDRC.6734              |
| 41701  | CG10426 | FBgn0036273 | CG10426 | P{TRiP.HMS02266}attP40 |
| 103714 | CG10428 | FBgn0032724 | CG10428 | VDRC.103714            |
| 44470  | CG10431 | FBgn0032730 | CG10431 | P{TRiP.HMC02345}attP2  |
| 56993  | CG10433 | FBgn0034638 | CG10433 | P{TRiP.HMC04435}attP40 |
| 25846  | CG10440 | FBgn0034636 | CG10440 | P{TRiP.JF01867}attP2   |
| 4722   | CG10444 | FBgn0034494 | CG10444 | VDRC.4722              |
| 43137  | CG10445 | FBgn0037531 | CG10445 | P{TRiP.GL01475}attP40  |
| 31945  | CG10462 | FBgn0032815 | CG10462 | P{TRiP.JF02236}attP2   |
| 31248  | CG10463 | FBgn0032819 | CG10463 | VDRC.31248             |
| 26002  | CG10465 | FBgn0033017 | CG10465 | P{TRiP.JF02026}attP2   |
| 55263  | CG10466 | FBgn0032822 | CG10466 | P{TRiP.HMC03950}attP40 |
| 55291  | CG10469 | FBgn0035678 | CG10469 | P{TRiP.HMC03978}attP2  |
| 42896  | CG10470 | FBgn0032746 | CG10470 | P{TRiP.HMS02589}attP40 |
| 43548  | CG10472 | FBgn0035670 | CG10472 | P{TRiP.HMS02654}attP40 |
| 51444  | CG10474 | FBgn0034427 | CG10474 | P{TRiP.HMC03158}attP2  |
| 51697  | CG10477 | FBgn0035661 | CG10477 | P{TRiP.HMC03143}attP2  |
| 31640  | CG10478 | FBgn0035657 | CG10478 | P{TRiP.JF01429}attP2   |
| 9312   | CG10481 | FBgn0032827 | CG10481 | VDRC.9312              |
| 34551  | CG10483 | FBgn0035649 | CG10483 | P{TRiP.HMS01023}attP2  |
| 43255  | CG10495 | FBgn0032750 | CG10495 | P{TRiP.GLC01444}attP2  |
| 16061  | CG10496 | FBgn0034631 | CG10496 | VDRC.16061             |
| 38317  | CG10505 | FBgn0034612 | CG10505 | P{TRiP.HMS01781}attP2  |
| 18635  | CG10510 | FBgn0037059 | CG10510 | VDRC.18635             |
| 31964  | CG10543 | FBgn0034570 | CG10543 | P{TRiP.JF02977}attP2   |
| 50606  | CG10555 | FBgn0030034 | CG10555 | P{TRiP.HMC02408}attP2  |
| 50975  | CG10559 | FBgn0039323 | CG10559 | P{TRiP.HMJ21081}attP40 |
| 43205  | CG10565 | FBgn0037051 | CG10565 | P{TRiP.GL01550}attP40  |
| 28379  | CG10566 | FBgn0037050 | CG10566 | P{TRiP.JF03016}attP2   |
| 34388  | CG10576 | FBgn0035630 | CG10576 | P{TRiP.HMS01382}attP2  |
| 48315  | CG10581 | FBgn0037046 | CG10581 | VDRC.48315             |
| 28681  | CG10584 | FBgn0037045 | CG10584 | VDRC.28681             |
| 106620 | CG10584 | FBgn0037045 | CG10584 | VDRC.106620            |
| 51910  | CG10585 | FBgn0037044 | CG10585 | P{TRiP.HMC03486}attP40 |
| 53359  | CG10587 | FBgn0037039 | CG10587 | P{TRiP.HMC03588}attP40 |
| 52977  | CG10588 | FBgn0037037 | CG10588 | P{TRiP.HMJ21664}attP40 |
| 50638  | CG10590 | FBgn0035622 | CG10590 | P{TRiP.HMC03038}attP2  |
| 50722  | CG10591 | FBgn0035621 | CG10591 | P{TRiP.HMS02956}attP40 |
| 56014  | CG10592 | FBgn0035619 | CG10592 | P{TRiP.HMC04310}attP40 |
| 44063  | CG10598 | FBgn0003057 | CG10598 | P{TRiP.HMS02780}attP40 |
| 31277  | CG10600 | FBgn0032717 | CG10600 | VDRC.31277             |
| 35482  | CG10602 | FBgn0032721 | CG10602 | P{TRiP.GL00411}attP2   |
| 44474  | CG10616 | FBgn0036286 | CG10616 | P{TRiP.HMC02359}attP2  |
| 42011  | CG10621 | FBgn0032726 | CG10621 | P{TRiP.HMS02412}attP40 |
| 51748  | CG10623 | FBgn0032727 | CG10623 | P{TRiP.HMC03299}attP2  |
| 41923  | CG10625 | FBgn0035612 | CG10625 | P{TRiP.HMS02320}attP2  |
| 58227  | CG10628 | FBgn0032818 | CG10628 | P{TRiP.HMJ22246}attP40 |
| 28001  | CG10631 | FBgn0032817 | CG10631 | P{TRiP.JF02835}attP2   |
| 35481  | CG10635 | FBgn0035603 | CG10635 | VDRC.35481             |
| 101310 | CG10635 | FBgn0035603 | CG10635 | VDRC.101310            |
| 31306  | CG10638 | FBgn0036290 | CG10638 | VDRC.31306             |
| 102914 | CG10638 | FBgn0036290 | CG10638 | VDRC.102914            |
| 51870  | CG10639 | FBgn0032729 | CG10639 | P{TRiP.HMC03444}attP40 |
| 31585  | CG10641 | FBgn0032731 | CG10641 | P{TRiP.JF01160}attP2   |
| 31307  | CG10641 | FBgn0032731 | CG10641 | VDRC.31307             |
| 42885  | CG10651 | FBgn0032853 | CG10651 | P{TRiP.HMS02578}attP40 |
| 27998  | CG10654 | FBgn0036294 | CG10654 | P{TRiP.JF02832}attP2   |
| 55737  | CG10663 | FBgn0036287 | CG10663 | P{TRiP.HMC03876}attP40 |
| 31946  | CG10669 | FBgn0039329 | CG10669 | P{TRiP.JF02237}attP2   |
| 57431  | CG10671 | FBgn0035586 | CG10671 | P{TRiP.HMC04738}attP40 |
| 32958  | CG10672 | FBgn0035588 | CG10672 | P{TRiP.HMS00753}attP2  |
| 35391  | CG10673 | FBgn0035590 | CG10673 | P{TRiP.GL00310}attP2   |
| 44558  | CG10681 | FBgn0036291 | CG10681 | P{TRiP.HMS02854}attP40 |
| 51905  | CG10688 | FBgn0036300 | CG10688 | P{TRiP.HMC03480}attP40 |
| 51434  | CG10694 | FBgn0039147 | CG10694 | P{TRiP.HMC03147}attP2  |
| 42663  | CG10702 | FBgn0032752 | CG10702 | P{TRiP.HMS02499}attP40 |

|       |         |                         |         |                        |
|-------|---------|-------------------------|---------|------------------------|
| 56028 | CG10730 | FBgn0032843             | CG10730 | P(TRIP.HMC04324)attP40 |
| 15778 | CG10730 | FBgn0032843             | CG10730 | VDRC.15778             |
| 38346 | CG10738 | FBgn0036368             | CG10738 | P(TRIP.HMS01814)attP2  |
| 34394 | CG10741 | FBgn0036373             | CG10741 | P(TRIP.HMS00981)attP2  |
| 57168 | CG10752 | FBgn0036325             | CG10752 | P(TRIP.HMC04549)attP40 |
| 55650 | CG10754 | FBgn0036314             | CG10754 | P(TRIP.HMC03799)attP40 |
| 41628 | CG10764 | FBgn0034221             | CG10764 | P(TRIP.GL01210)attP40  |
| 51815 | CG10778 | FBgn0029980             | CG10778 | P(TRIP.HMC03386)attP40 |
| 57504 | CG10803 | FBgn0029666             | CG10803 | P(TRIP.HMC04819)attP40 |
| 29599 | CG10804 | FBgn0029663             | CG10804 | P(TRIP.JF03278)attP2   |
| 28557 | CG10814 | FBgn0033830             | CG10814 | P(TRIP.HM05043)attP2   |
| 57526 | CG10827 | FBgn0038845             | CG10827 | P(TRIP.HMC04841)attP40 |
| 25848 | CG10830 | FBgn0038839             | CG10830 | P(TRIP.JF01889)attP2   |
| 27239 | CG10858 | FBgn0035458             | CG10858 | P(TRIP.JF02558)attP2   |
| 34878 | CG10863 | FBgn0027552             | CG10863 | P(TRIP.HMS00198)attP2  |
| 25878 | CG10864 | FBgn0038621             | CG10864 | P(TRIP.JF01917)attP2   |
| 55160 | CG10877 | FBgn0038804             | CG10877 | P(TRIP.HMC03835)attP40 |
| 25806 | CG1090  | FBgn0037238             | CG1090  | P(TRIP.JF01824)attP2   |
| 57481 | CG10903 | FBgn0037543             | CG10903 | P(TRIP.HMC04794)attP40 |
| 58154 | CG10904 | FBgn0034945             | CG10904 | P(TRIP.HM022105)attP40 |
| 55204 | CG10907 | FBgn0036207             | CG10907 | P(TRIP.HMC03919)attP40 |
| 36896 | CG1091  | FBgn0037470             | CG1091  | P(TRIP.GL01086)attP2   |
| 34879 | CG10915 | FBgn0034308             | CG10915 | P(TRIP.HMS00199)attP2  |
| 31375 | CG10915 | FBgn0034308             | CG10915 | VDRC.31375             |
| 37485 | CG10916 | FBgn0034312             | CG10916 | P(TRIP.GL00628)attP2   |
| 51912 | CG1092  | FBgn0037228             | CG1092  | P(TRIP.HMS03370)attP40 |
| 39068 | CG10920 | FBgn0029963             | CG10920 | P(TRIP.HM001988)attP40 |
| 44650 | CG10920 | FBgn0029963             | CG10920 | P(TRIP.HMC02379)attP2  |
| 36915 | CG10924 | FBgn0034356             | CG10924 | P(TRIP.HMS00200)attP2  |
| 54050 | CG10927 | FBgn0034360             | CG10927 | P(TRIP.HMS03521)attP40 |
| 51785 | CG10932 | FBgn0029969             | CG10932 | P(TRIP.HMC03340)attP40 |
| 38263 | CG10933 | FBgn0034264             | CG10933 | P(TRIP.HMS01708)attP40 |
| 55280 | CG10948 | FBgn0036317             | CG10948 | P(TRIP.HMC03967)attP40 |
| 26231 | CG10949 | FBgn0032858             | CG10949 | P(TRIP.JF02129)attP2   |
| 29361 | CG10959 | FBgn0030010             | CG10959 | P(TRIP.JF02525)attP2   |
| 34598 | CG10960 | FBgn0036316             | CG10960 | P(TRIP.HMS01072)attP2  |
| 29362 | CG10979 | FBgn0037379             | CG10979 | P(TRIP.JF02526)attP2   |
| 33953 | CG10992 | FBgn003052              | CG10992 | P(TRIP.HMS00906)attP2  |
| 51918 | CG11000 | FBgn0263353             | CG11000 | P(TRIP.HMS03377)attP2  |
| 34603 | CG11009 | FBgn0036318             | CG11009 | P(TRIP.HMS00563)attP2  |
| 57711 | CG11030 | FBgn0031736             | CG11030 | P(TRIP.HMC04900)attP2  |
| 53360 | CG11037 | FBgn0037038             | CG11037 | P(TRIP.HMC03589)attP40 |
| 31364 | CG11044 | FBgn0034484             | CG11044 | P(TRIP.JF01325)attP2   |
| 31224 | CG1105  | FBgn0037465             | CG1105  | P(TRIP.JF01782)attP2   |
| 43214 | CG11050 | FBgn0031836             | CG11050 | P(TRIP.GL01559)attP40  |
| 26766 | CG11071 | FBgn0030532             | CG11071 | P(TRIP.JF02330)attP2   |
| 31101 | CG11077 | FBgn0039930             | CG11077 | P(TRIP.JF01566)attP2   |
| 42516 | CG11085 | FBgn0030408             | CG11085 | P(TRIP.HM02082)attP40  |
| 53332 | CG11089 | FBgn0039241 FBgn0043799 | CG11089 | P(TRIP.HMC03561)attP40 |
| 55249 | CG1109  | FBgn0046222             | CG1109  | P(TRIP.HMC03936)attP40 |
| 34090 | CG11092 | FBgn0027537             | CG11092 | P(TRIP.HMS00898)attP2  |
| 44085 | CG11093 | FBgn0039932             | CG11093 | P(TRIP.HMS02802)attP2  |
| 51766 | CG11099 | FBgn0034485             | CG11099 | P(TRIP.HMC03321)attP2  |
| 41992 | CG11107 | FBgn0033160             | CG11107 | P(TRIP.HMS02393)attP40 |
| 56897 | CG11109 | FBgn0037200             | CG11109 | P(TRIP.HMC04118)attP40 |
| 57760 | CG11122 | FBgn0030266             | CG11122 | P(TRIP.HMC04953)attP40 |
| 36843 | CG11123 | FBgn0033169             | CG11123 | P(TRIP.GL01095)attP2   |
| 35616 | CG11125 | FBgn0033174             | CG11125 | P(TRIP.GL00460)attP2   |
| 28637 | CG11134 | FBgn0030518             | CG11134 | P(TRIP.JF03052)attP2   |
| 57741 | CG11147 | FBgn0031734             | CG11147 | P(TRIP.HMC04933)attP40 |
| 28896 | CG11148 | FBgn0039936             | CG11148 | P(TRIP.HM05106)attP2   |
| 44010 | CG1115  | FBgn0037299             | CG1115  | P(TRIP.HMS02724)attP40 |
| 51413 | CG11151 | FBgn0030519             | CG11151 | P(TRIP.GLC01784)attP40 |
| 31991 | CG11155 | FBgn0039927             | CG11155 | P(TRIP.JF03425)attP2   |
| 28638 | CG11163 | FBgn0025693             | CG11163 | P(TRIP.JF03053)attP2   |
| 50512 | CG11164 | FBgn0030507             | CG11164 | P(TRIP.GLC01630)attP2  |
| 28629 | CG11180 | FBgn0034528             | CG11180 | P(TRIP.JF03044)attP2   |
| 44454 | CG11190 | FBgn0030035             | CG11190 | P(TRIP.GLC01606)attP2  |

|       |         |             |         |                        |
|-------|---------|-------------|---------|------------------------|
| 52893 | CG11192 | FBgn0034507 | CG11192 | P[TRIP.HMC03631]attP40 |
| 29603 | CG11221 | FBgn0031855 | CG11221 | P[TRIP.JF03282]attP2   |
| 57486 | CG11236 | FBgn0031860 | CG11236 | P[TRIP.HMC04799]attP40 |
| 57190 | CG1124  | FBgn0037290 | CG1124  | P[TRIP.HMC04572]attP40 |
| 58188 | CG11241 | FBgn0037186 | CG11241 | P[TRIP.HMC04925]attP40 |
| 31947 | CG11247 | FBgn0037120 | CG11247 | P[TRIP.JF02238]attP2   |
| 57240 | CG11249 | FBgn0037115 | CG11249 | P[TRIP.HMC04626]attP40 |
| 50549 | CG11261 | FBgn0036332 | CG11261 | P[TRIP.GLC01669]attP2  |
| 44431 | CG11266 | FBgn0031883 | CG11266 | P[TRIP.GLC01382]attP2  |
| 43162 | CG11267 | FBgn0036334 | CG11267 | P[TRIP.HMC01504]attP2  |
| 40919 | CG11286 | FBgn0037516 | CG11286 | P[TRIP.HMS02167]attP2  |
| 28615 | CG1129  | FBgn0037279 | CG1129  | P[TRIP.JF03030]attP2   |
| 62287 | CG1129  | FBgn0037279 | CG1129  | P[TRIP.HMJ23644]attP40 |
| 31973 | CG11293 | FBgn0034889 | CG11293 | P[TRIP.JF03407]attP2   |
| 28641 | CG11294 | FBgn0030058 | CG11294 | P[TRIP.JF03056]attP2   |
| 55197 | CG11313 | FBgn0039798 | CG11313 | P[TRIP.HMC03894]attP40 |
| 28065 | CG11317 | FBgn0039816 | CG11317 | P[TRIP.JF02902]attP2   |
| 51792 | CG11318 | FBgn0039818 | CG11318 | P[TRIP.HMC03348]attP2  |
| 38231 | CG11320 | FBgn0031837 | CG11320 | P[TRIP.HMS01675]attP40 |
| 41847 | CG11329 | FBgn0031848 | CG11329 | P[TRIP.GLC01275]attP2  |
| 26003 | CG11340 | FBgn0039840 | CG11340 | P[TRIP.JF02028]attP2   |
| 58294 | CG11373 | FBgn0040679 | CG11373 | P[TRIP.HMJ22401]attP40 |
| 51741 | CG11377 | FBgn0031217 | CG11377 | P[TRIP.GLC01799]attP2  |
| 36892 | CG11378 | FBgn0040364 | CG11378 | P[TRIP.GLC01074]attP2  |
| 58242 | CG1138  | FBgn0037456 | CG1138  | P[TRIP.HMJ22263]attP40 |
| 42477 | CG11380 | FBgn0040359 | CG11380 | P[TRIP.GLC01146]attP2  |
| 42940 | CG11388 | FBgn0034959 | CG11388 | P[TRIP.HMS02633]attP40 |
| 3604  | CG11388 | FBgn0034959 | CG11388 | VDRC.3604              |
| 55266 | CG11391 | FBgn0038732 | CG11391 | P[TRIP.HMC03953]attP40 |
| 36109 | CG11398 | FBgn0040366 | CG11398 | P[TRIP.HMS00201]attP2  |
| 51899 | CG1140  | FBgn0035298 | CG1140  | P[TRIP.HMC03473]attP40 |
| 51800 | CG11403 | FBgn0026876 | CG11403 | P[TRIP.HMC03357]attP40 |
| 50554 | CG11406 | FBgn0034990 | CG11406 | P[TRIP.GLC01674]attP2  |
| 52881 | CG11418 | FBgn0024360 | CG11418 | P[TRIP.HMC03619]attP40 |
| 42591 | CG11423 | FBgn0034251 | CG11423 | P[TRIP.HMS02423]attP40 |
| 57234 | CG11425 | FBgn0037167 | CG11425 | P[TRIP.HMC04619]attP40 |
| 43281 | CG11426 | FBgn0037166 | CG11426 | P[TRIP.HMC02680]attP2  |
| 31721 | CG11437 | FBgn0037165 | CG11437 | P[TRIP.HMC04029]attP2  |
| 57523 | CG11438 | FBgn0037164 | CG11438 | P[TRIP.HMC04838]attP40 |
| 43207 | CG11447 | FBgn0038737 | CG11447 | P[TRIP.GLC01552]attP40 |
| 28309 | CG11448 | FBgn0024985 | CG11448 | P[TRIP.JF02940]attP2   |
| 55267 | CG11453 | FBgn0038734 | CG11453 | P[TRIP.HMC03954]attP40 |
| 55180 | CG11455 | FBgn0031228 | CG11455 | P[TRIP.HMC03861]attP40 |
| 26240 | CG11456 | FBgn0037031 | CG11456 | P[TRIP.JF02138]attP2   |
| 58133 | CG11475 | FBgn0034687 | CG11475 | P[TRIP.HMJ22082]attP40 |
| 42492 | CG11486 | FBgn0035397 | CG11486 | P[TRIP.HMJ02056]attP40 |
| 34859 | CG11490 | FBgn0031233 | CG11490 | P[TRIP.HMS00177]attP2  |
| 42509 | CG11504 | FBgn0039733 | CG11504 | P[TRIP.HMJ02074]attP40 |
| 34657 | CG11526 | FBgn0035437 | CG11526 | P[TRIP.HMS01134]attP2  |
| 51469 | CG11529 | FBgn0036264 | CG11529 | P[TRIP.HMC03210]attP2  |
| 34384 | CG11534 | FBgn0046296 | CG11534 | P[TRIP.HMS01374]attP2  |
| 43180 | CG11537 | FBgn0035400 | CG11537 | P[TRIP.GLC01523]attP2  |
| 4118  | CG11537 | FBgn0035400 | CG11537 | VDRC.4118              |
| 35716 | CG11539 | FBgn0039859 | CG11539 | P[TRIP.GLV21081]attP2  |
| 29609 | CG11550 | FBgn0039864 | CG11550 | P[TRIP.JF03288]attP2   |
| 42790 | CG11555 | FBgn0086856 | CG11555 | P[TRIP.GLC01160]attP2  |
| 31939 | CG11560 | FBgn0036249 | CG11560 | P[TRIP.JF02230]attP2   |
| 29531 | CG11576 | FBgn0039882 | CG11576 | P[TRIP.HMS05210]attP2  |
| 33337 | CG11585 | FBgn0030543 | CG11585 | P[TRIP.HMS00203]attP2  |
| 41956 | CG11592 | FBgn0025686 | CG11592 | P[TRIP.HMS02353]attP2  |
| 32924 | CG11593 | FBgn0035488 | CG11593 | P[TRIP.HMS00715]attP2  |
| 57755 | CG11594 | FBgn0035484 | CG11594 | P[TRIP.HMC04948]attP40 |
| 43175 | CG11597 | FBgn0036212 | CG11597 | P[TRIP.GLC01517]attP2  |
| 51000 | CG11598 | FBgn0038067 | CG11598 | P[TRIP.HMJ21113]attP40 |
| 42525 | CG11617 | FBgn0031232 | CG11617 | P[TRIP.HMJ02091]attP40 |
| 44566 | CG11630 | FBgn0032964 | CG11630 | P[TRIP.HMS02862]attP40 |
| 31373 | CG11658 | FBgn0036196 | CG11658 | P[TRIP.JF01340]attP2   |
| 55268 | CG11659 | FBgn0038731 | CG11659 | P[TRIP.HMC03955]attP40 |

|       |         |             |         |                        |
|-------|---------|-------------|---------|------------------------|
| 35293 | CG11660 | FBgn0036187 | CG11660 | P{TRIP.GL00195}attP2   |
| 52902 | CG11665 | FBgn0033028 | CG11665 | P{TRIP.HMC03642}attP40 |
| 55733 | CG11668 | FBgn0038113 | CG11668 | P{TRIP.HMC03756}attP40 |
| 55738 | CG11670 | FBgn0038114 | CG11670 | P{TRIP.HMC03877}attP40 |
| 44003 | CG11671 | FBgn0037562 | CG11671 | P{TRIP.HMS02717}attP40 |
| 42913 | CG11672 | FBgn0037563 | CG11672 | P{TRIP.HMS02606}attP40 |
| 51740 | CG11674 | FBgn0030551 | CG11674 | P{TRIP.GLC01798}attP2  |
| 57246 | CG11695 | FBgn0030316 | CG11695 | P{TRIP.HMC04633}attP40 |
| 27999 | CG11696 | FBgn0030314 | CG11696 | P{TRIP.JF02833}attP2   |
| 43211 | CG11714 | FBgn0036170 | CG11714 | P{TRIP.GL01556}attP40  |
| 44500 | CG1172  | FBgn0264712 | CG1172  | P{TRIP.HMC02436}attP2  |
| 28567 | CG11722 | FBgn0037777 | CG11722 | P{TRIP.HM05053}attP2   |
| 42514 | CG11723 | FBgn0031391 | CG11723 | P{TRIP.HMJ02079}attP40 |
| 38350 | CG11727 | FBgn0262740 | CG11727 | P{TRIP.HMS01818}attP40 |
| 38230 | CG11739 | FBgn0037239 | CG11739 | P{TRIP.HMS01674}attP40 |
| 42531 | CG11762 | FBgn0037618 | CG11762 | P{TRIP.HMJ02098}attP40 |
| 43155 | CG11779 | FBgn0038683 | CG11779 | P{TRIP.GL01496}attP2   |
| 54043 | CG11788 | FBgn0034495 | CG11788 | P{TRIP.HMJ21486}attP40 |
| 52923 | CG11796 | FBgn0036992 | CG11796 | P{TRIP.HMC03663}attP40 |
| 31564 | CG11796 | FBgn0036992 | CG11796 | VDRC.31564             |
| 53253 | CG11807 | FBgn0033996 | CG11807 | P{TRIP.GLC01813}attP2  |
| 35268 | CG11811 | FBgn0036099 | CG11811 | P{TRIP.GL00163}attP2   |
| 58199 | CG11825 | FBgn0033519 | CG11825 | P{TRIP.HMJ22169}attP40 |
| 41725 | CG11835 | FBgn0031264 | CG11835 | P{TRIP.HMS02291}attP2  |
| 43308 | CG11836 | FBgn0039272 | CG11836 | P{TRIP.HMS02692}attP2  |
| 41610 | CG11836 | FBgn0039272 | CG11836 | P{TRIP.GL01192}attP40  |
| 42932 | CG11837 | FBgn0039627 | CG11837 | P{TRIP.HMS02625}attP40 |
| 51924 | CG11839 | FBgn0039271 | CG11839 | P{TRIP.HMS03375}attP2  |
| 55617 | CG11842 | FBgn0039629 | CG11842 | P{TRIP.HMC03760}attP40 |
| 44092 | CG11843 | FBgn0039630 | CG11843 | P{TRIP.HMS02809}attP2  |
| 57193 | CG11852 | FBgn0039297 | CG11852 | P{TRIP.HMC04575}attP40 |
| 57194 | CG11854 | FBgn0039299 | CG11854 | P{TRIP.HMC04576}attP40 |
| 57435 | CG11857 | FBgn0039303 | CG11857 | P{TRIP.HMC04742}attP40 |
| 35379 | CG11859 | FBgn0039306 | CG11859 | P{TRIP.GL00293}attP2   |
| 31064 | CG11866 | FBgn0033486 | CG11866 | P{TRIP.JF01514}attP2   |
| 32505 | CG11873 | FBgn0039633 | CG11873 | P{TRIP.HMS00509}attP2  |
| 55619 | CG11876 | FBgn0039635 | CG11876 | P{TRIP.HMC03762}attP40 |
| 40858 | CG11877 | FBgn0039636 | CG11877 | P{TRIP.HMS02025}attP40 |
| 44113 | CG11880 | FBgn0039637 | CG11880 | P{TRIP.HMS02835}attP40 |
| 31555 | CG11882 | FBgn0039642 | CG11882 | P{TRIP.JF01122}attP2   |
| 35713 | CG11883 | FBgn0033538 | CG11883 | P{TRIP.GLV21078}attP2  |
| 26021 | CG11889 | FBgn0039308 | CG11889 | P{TRIP.JF02046}attP2   |
| 26021 | CG11891 | FBgn0039309 | CG11891 | P{TRIP.JF02046}attP2   |
| 38318 | CG11897 | FBgn0039644 | CG11897 | P{TRIP.HMS01782}attP2  |
| 51476 | CG11899 | FBgn0014427 | CG11899 | P{TRIP.HMC03221}attP40 |
| 29363 | CG11902 | FBgn0028647 | CG11902 | P{TRIP.JF02527}attP2   |
| 26767 | CG11906 | FBgn0034425 | CG11906 | P{TRIP.JF02331}attP2   |
| 52894 | CG11911 | FBgn0031249 | CG11911 | P{TRIP.HMC03633}attP40 |
| 55141 | CG11912 | FBgn0031248 | CG11912 | P{TRIP.HMC03737}attP40 |
| 34860 | CG11920 | FBgn0039274 | CG11920 | P{TRIP.HMS00178}attP2  |
| 51735 | CG11951 | FBgn0039656 | CG11951 | P{TRIP.HMS03163}attP2  |
| 44046 | CG11966 | FBgn0037645 | CG11966 | P{TRIP.HMS02762}attP2  |
| 57269 | CG11970 | FBgn0027503 | CG11970 | P{TRIP.HMC04663}attP40 |
| 32507 | CG11984 | FBgn0037655 | CG11984 | P{TRIP.HMS00511}attP2  |
| 34788 | CG11985 | FBgn0040534 | CG11985 | P{TRIP.HMS00097}attP2  |
| 36753 | CG11997 | FBgn0037662 | CG11997 | P{TRIP.HMS03013}attP2  |
| 34604 | CG11999 | FBgn0037312 | CG11999 | P{TRIP.HMS00565}attP2  |
| 37499 | CG12001 | FBgn0037265 | CG12001 | P{TRIP.HMS01641}attP40 |
| 57429 | CG12004 | FBgn0035236 | CG12004 | P{TRIP.HMC04736}attP40 |
| 38359 | CG12006 | FBgn0035464 | CG12006 | P{TRIP.HMS01827}attP2  |
| 43256 | CG12007 | FBgn0037293 | CG12007 | P{TRIP.GLC01445}attP2  |
| 41968 | CG12009 | FBgn0035430 | CG12009 | P{TRIP.HMS02365}attP2  |
| 34015 | CG12012 | FBgn0035444 | CG12012 | P{TRIP.HMS00982}attP2  |
| 51901 | CG12014 | FBgn0035445 | CG12014 | P{TRIP.HMC03475}attP40 |
| 58237 | CG12016 | FBgn0035436 | CG12016 | P{TRIP.HMJ22257}attP40 |
| 36759 | CG12034 | FBgn0035421 | CG12034 | P{TRIP.HMS03020}attP2  |
| 28382 | CG12038 | FBgn0035179 | CG12038 | P{TRIP.JF03019}attP2   |
| 51178 | CG12038 | FBgn0035179 | CG12038 | VDRC.51178             |

|       |         |             |         |                         |
|-------|---------|-------------|---------|-------------------------|
| 28592 | CG12050 | FBgn0032915 | CG12050 | P{TRIP.HM05080}attP2    |
| 50910 | CG12054 | FBgn0039831 | CG12054 | P{TRIP.HM.J03134}attP40 |
| 51395 | CG12056 | FBgn0030099 | CG12056 | P{TRIP.GLC01627}attP2   |
| 53686 | CG12057 | FBgn0030098 | CG12057 | P{TRIP.HM.J21609}attP40 |
| 26248 | CG12061 | FBgn0040031 | CG12061 | P{TRIP.JF02147}attP2    |
| 34636 | CG12065 | FBgn0030052 | CG12065 | P{TRIP.HMS01111}attP2   |
| 27677 | CG12069 | FBgn0039796 | CG12069 | P{TRIP.JF02756}attP2    |
| 26768 | CG12071 | FBgn0039808 | CG12071 | P{TRIP.JF02332}attP2    |
| 42952 | CG12075 | FBgn0030065 | CG12075 | P{TRIP.HMS02645}attP40  |
| 44535 | CG12079 | FBgn0035404 | CG12079 | P{TRIP.HMC02929}attP40  |
| 31886 | CG12082 | FBgn0035402 | CG12082 | P{TRIP.JF02163}attP2    |
| 34553 | CG12084 | FBgn0043458 | CG12084 | P{TRIP.HMS01025}attP2   |
| 57492 | CG12090 | FBgn0035227 | CG12090 | P{TRIP.HMC04806}attP40  |
| 40936 | CG12091 | FBgn0035228 | CG12091 | P{TRIP.HMS02184}attP2   |
| 43216 | CG12104 | FBgn0035238 | CG12104 | P{TRIP.GL01561}attP40   |
| 43311 | CG12111 | FBgn0030050 | CG12111 | P{TRIP.HMS02695}attP2   |
| 42003 | CG12115 | FBgn0030097 | CG12115 | P{TRIP.HMS02404}attP40  |
| 33997 | CG12128 | FBgn0033473 | CG12128 | P{TRIP.HMS00960}attP2   |
| 52889 | CG12129 | FBgn0033475 | CG12129 | P{TRIP.HMC03627}attP40  |
| 43312 | CG12133 | FBgn0033469 | CG12133 | P{TRIP.HMS02696}attP2   |
| 56864 | CG12140 | FBgn0033465 | CG12140 | P{TRIP.HMC03516}attP40  |
| 42612 | CG12147 | FBgn0037325 | CG12147 | P{TRIP.HMS02447}attP2   |
| 26232 | CG12155 | FBgn0029957 | CG12155 | P{TRIP.JF02130}attP2    |
| 38627 | CG12155 | FBgn0029957 | CG12155 | VDRC.38627              |
| 51514 | CG12162 | FBgn0037329 | CG12162 | P{TRIP.HMC03291}attP2   |
| 33955 | CG12163 | FBgn0260462 | CG12163 | P{TRIP.HMS00910}attP2   |
| 40867 | CG12170 | FBgn0037356 | CG12170 | P{TRIP.HMS02034}attP40  |
| 50977 | CG12173 | FBgn0037305 | CG12173 | P{TRIP.HM.J21083}attP40 |
| 34389 | CG1218  | FBgn0037377 | CG1218  | P{TRIP.HMS01383}attP2   |
| 33338 | CG12201 | FBgn0037970 | CG12201 | P{TRIP.HMS00204}attP2   |
| 53325 | CG12203 | FBgn0031021 | CG12203 | P{TRIP.HMC03554}attP40  |
| 42983 | CG12203 | FBgn0031021 | CG12203 | VDRC.42983              |
| 42872 | CG12213 | FBgn0260742 | CG12213 | P{TRIP.HMS02565}attP40  |
| 28000 | CG12219 | FBgn0043796 | CG12219 | P{TRIP.JF02834}attP2    |
| 25818 | CG12224 | FBgn0037974 | CG12224 | P{TRIP.JF01836}attP2    |
| 31949 | CG12236 | FBgn0029822 | CG12236 | P{TRIP.JF02241}attP2    |
| 38343 | CG12237 | FBgn0031048 | CG12237 | P{TRIP.HMS01810}attP2   |
| 28727 | CG12239 | FBgn0029810 | CG12239 | P{TRIP.JF03154}attP2    |
| 33729 | CG12241 | FBgn0038304 | CG12241 | P{TRIP.HMS00612}attP2   |
| 32437 | CG12262 | FBgn0035811 | CG12262 | P{TRIP.HMS00435}attP2   |
| 32436 | CG12262 | FBgn0035811 | CG12262 | P{TRIP.HMS00434}attP2   |
| 32877 | CG12264 | FBgn0032393 | CG12264 | P{TRIP.HMS00665}attP2   |
| 35797 | CG1227  | FBgn0037491 | CG1227  | P{TRIP.GL00304}attP2    |
| 51906 | CG12272 | FBgn0036571 | CG12272 | P{TRIP.HMC03481}attP40  |
| 56037 | CG12288 | FBgn0032620 | CG12288 | P{TRIP.HMC04345}attP40  |
| 42520 | CG12290 | FBgn0039419 | CG12290 | P{TRIP.HM.J02086}attP40 |
| 33957 | CG12299 | FBgn0032295 | CG12299 | P{TRIP.HMS00912}attP2   |
| 29412 | CG12301 | FBgn0036514 | CG12301 | P{TRIP.JF03348}attP2    |
| 31950 | CG1233  | FBgn0035137 | CG1233  | P{TRIP.JF02242}attP2    |
| 57779 | CG12338 | FBgn0033543 | CG12338 | P{TRIP.HMC04973}attP40  |
| 35587 | CG1234  | FBgn0037489 | CG1234  | P{TRIP.GL00421}attP2    |
| 55697 | CG12343 | FBgn0033556 | CG12343 | P{TRIP.HMC03911}attP40  |
| 26250 | CG12344 | FBgn0033558 | CG12344 | P{TRIP.JF02149}attP2    |
| 37165 | CG12344 | FBgn0033558 | CG12344 | VDRC.37165              |
| 53274 | CG1236  | FBgn0037370 | CG1236  | P{TRIP.HMC03490}attP40  |
| 34341 | CG12360 | FBgn0038111 | CG12360 | P{TRIP.HMS01329}attP2   |
| 44506 | CG1239  | FBgn0037368 | CG1239  | P{TRIP.HMC02896}attP2   |
| 40847 | CG12391 | FBgn0033581 | CG12391 | P{TRIP.HMS02014}attP40  |
| 32919 | CG12393 | FBgn0031768 | CG12393 | P{TRIP.HMS00709}attP2   |
| 57485 | CG12398 | FBgn0030596 | CG12398 | P{TRIP.HMC04798}attP40  |
| 31359 | CG12402 | FBgn0038202 | CG12402 | P{TRIP.JF011317}attP2   |
| 41989 | CG12404 | FBgn0032465 | CG12404 | P{TRIP.HMS02388}attP40  |
| 41839 | CG12413 | FBgn0039588 | CG12413 | P{TRIP.GL01267}attP2    |
| 53976 | CG12420 | FBgn0037797 | CG12420 | P{TRIP.HM.J21365}attP40 |
| 58275 | CG12438 | FBgn0032065 | CG12438 | P{TRIP.HM.J22358}attP40 |
| 53988 | CG12464 | FBgn0033861 | CG12464 | P{TRIP.HM.J21392}attP40 |
| 54826 | CG12481 | FBgn0030542 | CG12481 | P{TRIP.HM.J21545}attP40 |
| 44511 | CG12490 | FBgn0034782 | CG12490 | P{TRIP.HMC02901}attP2   |

|       |         |             |         |                         |
|-------|---------|-------------|---------|-------------------------|
| 42791 | CG12493 | FBgn0035571 | CG12493 | P{TRIP.GL01161}.attP2   |
| 55269 | CG12512 | FBgn0031703 | CG12512 | P{TRIP.HMC03956}.attP40 |
| 51742 | CG12517 | FBgn0032311 | CG12517 | P{TRIP.GLC01800}.attP2  |
| 55615 | CG12558 | FBgn0039599 | CG12558 | P{TRIP.HMC03754}.attP40 |
| 50973 | CG12567 | FBgn0039958 | CG12567 | P{TRIP.HMJ21079}.attP40 |
| 35487 | CG12576 | FBgn0031190 | CG12576 | P{TRIP.GL00416}.attP2   |
| 53272 | CG12582 | FBgn0037215 | CG12582 | P{TRIP.HMC03488}.attP40 |
| 36079 | CG12592 | FBgn0037811 | CG12592 | P{TRIP.GL00498}.attP2   |
| 29611 | CG12594 | FBgn0037941 | CG12594 | P{TRIP.JF03290}.attP2   |
| 29364 | CG12605 | FBgn0035481 | CG12605 | P{TRIP.JF02528}.attP2   |
| 52978 | CG12637 | FBgn0030224 | CG12637 | P{TRIP.HMJ21665}.attP40 |
| 52952 | CG12640 | FBgn0030202 | CG12640 | P{TRIP.HMJ21621}.attP40 |
| 28318 | CG12645 | FBgn0030181 | CG12645 | P{TRIP.JF02949}.attP2   |
| 31962 | CG12659 | FBgn0040929 | CG12659 | P{TRIP.JF02829}.attP2   |
| 57169 | CG12692 | FBgn0029703 | CG12692 | P{TRIP.HMC04550}.attP40 |
| 44111 | CG12699 | FBgn0046294 | CG12699 | P{TRIP.HMS02833}.attP40 |
| 35359 | CG1271  | FBgn0035392 | CG1271  | P{TRIP.GL00271}.attP2   |
| 58315 | CG12713 | FBgn0036536 | CG12713 | P{TRIP.HMJ22422}.attP40 |
| 50917 | CG12723 | FBgn0030459 | CG12723 | P{TRIP.HMJ21006}.attP40 |
| 58214 | CG12728 | FBgn0029825 | CG12728 | P{TRIP.HMJ22221}.attP40 |
| 31141 | CG12736 | FBgn0033184 | CG12736 | P{TRIP.JF01616}.attP2   |
| 62932 | CG12736 | FBgn0033184 | CG12736 | P{TRIP.HMJ30009}.attP40 |
| 57235 | CG12746 | FBgn0037341 | CG12746 | P{TRIP.HMC04620}.attP40 |
| 31918 | CG12768 | FBgn0037206 | CG12768 | P{TRIP.JF02208}.attP2   |
| 26769 | CG12769 | FBgn0033252 | CG12769 | P{TRIP.JF02333}.attP2   |
| 43276 | CG12772 | FBgn0030055 | CG12772 | P{TRIP.GLC01466}.attP2  |
| 46140 | CG12772 | FBgn0030055 | CG12772 | VDRC.46140              |
| 27678 | CG12783 | FBgn0038448 | CG12783 | P{TRIP.JF02757}.attP2   |
| 57225 | CG12788 | FBgn0031041 | CG12788 | P{TRIP.HMC04608}.attP40 |
| 34920 | CG12795 | FBgn0031535 | CG12795 | P{TRIP.HMS01269}.attP2  |
| 29612 | CG12796 | FBgn0029909 | CG12796 | P{TRIP.JF03291}.attP2   |
| 44529 | CG12817 | FBgn0037798 | CG12817 | P{TRIP.HMC02923}.attP40 |
| 40859 | CG12821 | FBgn0040780 | CG12821 | P{TRIP.HMS02026}.attP40 |
| 29418 | CG12858 | FBgn0033958 | CG12858 | P{TRIP.JF03354}.attP2   |
| 57427 | CG12866 | FBgn0033955 | CG12866 | P{TRIP.HMC04734}.attP40 |
| 36834 | CG12877 | FBgn0039544 | CG12877 | P{TRIP.GL01075}.attP2   |
| 51876 | CG12895 | FBgn0033523 | CG12895 | P{TRIP.HMC03450}.attP40 |
| 44654 | CG12909 | FBgn0033507 | CG12909 | P{TRIP.HMC02419}.attP2  |
| 55671 | CG1291  | FBgn0035401 | CG1291  | P{TRIP.HMC03827}.attP40 |
| 44517 | CG12923 | FBgn0033461 | CG12923 | P{TRIP.HMC02907}.attP2  |
| 27077 | CG12942 | FBgn0033569 | CG12942 | P{TRIP.JF02422}.attP2   |
| 56990 | CG12943 | FBgn0033572 | CG12943 | P{TRIP.HMC04432}.attP40 |
| 50698 | CG12951 | FBgn0037677 | CG12951 | P{TRIP.HMC03100}.attP40 |
| 26284 | CG1299  | FBgn0035501 | CG1299  | P{TRIP.JF02053}.attP2   |
| 36910 | CG13000 | FBgn0030807 | CG13000 | P{TRIP.GL01118}.attP2   |
| 43163 | CG13004 | FBgn0030797 | CG13004 | P{TRIP.GL01505}.attP2   |
| 43967 | CG13005 | FBgn0030794 | CG13005 | P{TRIP.GL01577}.attP2   |
| 58091 | CG13018 | FBgn0040751 | CG13018 | P{TRIP.HMJ22006}.attP40 |
| 53363 | CG1304  | FBgn0031141 | CG1304  | P{TRIP.HMC03592}.attP40 |
| 33340 | CG13096 | FBgn0032050 | CG13096 | P{TRIP.HMS00206}.attP2  |
| 28632 | CG13114 | FBgn0032127 | CG13114 | P{TRIP.JF03047}.attP2   |
| 51678 | CG13117 | FBgn0032140 | CG13117 | P{TRIP.GLC01761}.attP2  |
| 27240 | CG13120 | FBgn0032142 | CG13120 | P{TRIP.JF02559}.attP2   |
| 25883 | CG13121 | FBgn0032145 | CG13121 | P{TRIP.JF01923}.attP2   |
| 27240 | CG13121 | FBgn0032145 | CG13121 | P{TRIP.JF02559}.attP2   |
| 29545 | CG13123 | FBgn0032150 | CG13123 | P{TRIP.JF02423}.attP2   |
| 50566 | CG13126 | FBgn0032168 | CG13126 | P{TRIP.GLC01687}.attP2  |
| 58142 | CG13133 | FBgn0032181 | CG13133 | P{TRIP.HMJ22092}.attP40 |
| 58324 | CG13135 | FBgn0032184 | CG13135 | P{TRIP.HMJ22454}.attP40 |
| 58171 | CG13138 | FBgn0032211 | CG13138 | P{TRIP.HMJ22148}.attP40 |
| 53323 | CG1315  | FBgn0026565 | CG1315  | P{TRIP.HMC03552}.attP40 |
| 47097 | CG1315  | FBgn0026565 | CG1315  | VDRC.47097              |
| 55288 | CG13168 | FBgn0033705 | CG13168 | P{TRIP.HMC03975}.attP2  |
| 35031 | CG13183 | FBgn0033667 | CG13183 | P{TRIP.HMS01444}.attP2  |
| 41838 | CG13185 | FBgn0033661 | CG13185 | P{TRIP.GL01266}.attP2   |
| 35032 | CG13188 | FBgn0033668 | CG13188 | P{TRIP.HMS01445}.attP2  |
| 42894 | CG13189 | FBgn0033665 | CG13189 | P{TRIP.HMS02587}.attP40 |
| 34390 | CG13192 | FBgn0033653 | CG13192 | P{TRIP.HMS01384}.attP2  |



|       |         |             |         |                        |
|-------|---------|-------------|---------|------------------------|
| 39052 | CG13197 | FBgn0062449 | CG13197 | P{TRIP.HMS01972}attP2  |
| 31919 | CG13204 | FBgn0033627 | CG13204 | P{TRIP.JF02209}attP2   |
| 52984 | CG13220 | FBgn0033608 | CG13220 | P{TRIP.HMJ21671}attP40 |
| 29419 | CG13229 | FBgn0033579 | CG13229 | P{TRIP.JF03355}attP2   |
| 34861 | CG13243 | FBgn0028903 | CG13243 | P{TRIP.HMS00179}attP2  |
| 50933 | CG13245 | FBgn0045827 | CG13245 | P{TRIP.HMJ21027}attP40 |
| 28761 | CG13248 | FBgn0036984 | CG13248 | P{TRIP.JF03189}attP2   |
| 56960 | CG13282 | FBgn0032612 | CG13282 | P{TRIP.HMC04401}attP40 |
| 53680 | CG13285 | FBgn0035611 | CG13285 | P{TRIP.HMJ21593}attP40 |
| 38170 | CG13285 | FBgn0035611 | CG13285 | VDRC.38170             |
| 57443 | CG13287 | FBgn0035643 | CG13287 | P{TRIP.HMC04751}attP40 |
| 38380 | CG13293 | FBgn0035677 | CG13293 | P{TRIP.HMS01849}attP40 |
| 31724 | CG13298 | FBgn0035692 | CG13298 | P{TRIP.HM04033}attP2   |
| 56925 | CG13309 | FBgn0035933 | CG13309 | P{TRIP.HMC04364}attP40 |
| 55949 | CG13312 | FBgn0035931 | CG13312 | P{TRIP.HMC04238}attP40 |
| 55143 | CG13318 | FBgn0037627 | CG13318 | P{TRIP.HMC03739}attP40 |
| 53969 | CG13323 | FBgn0033788 | CG13323 | P{TRIP.HMJ21352}attP40 |
| 41831 | CG13344 | FBgn0033884 | CG13344 | P{TRIP.GL01259}attP2   |
| 17141 | CG13344 | FBgn0033884 | CG13344 | VDRC.17141             |
| 42785 | CG13349 | FBgn0033886 | CG13349 | P{TRIP.GL01155}attP2   |
| 42951 | CG13365 | FBgn0029529 | CG13365 | P{TRIP.HMS02644}attP40 |
| 34656 | CG13366 | FBgn0025633 | CG13366 | P{TRIP.HMS01133}attP2  |
| 35292 | CG13369 | FBgn0025640 | CG13369 | P{TRIP.GL00194}attP2   |
| 41703 | CG13384 | FBgn0032036 | CG13384 | P{TRIP.HMS02268}attP2  |
| 51808 | CG13397 | FBgn0014417 | CG13397 | P{TRIP.HMC03368}attP40 |
| 52972 | CG13423 | FBgn0034513 | CG13423 | P{TRIP.HMJ21657}attP40 |
| 52967 | CG13427 | FBgn0034514 | CG13427 | P{TRIP.HMJ21652}attP40 |
| 35261 | CG1344  | FBgn0027507 | CG1344  | P{TRIP.GL00152}attP2   |
| 35769 | CG13442 | FBgn0034546 | CG13442 | P{TRIP.HMS01518}attP2  |
| 36819 | CG13472 | FBgn0036450 | CG13472 | P{TRIP.GL01047}attP2   |
| 36124 | CG13474 | FBgn0036439 | CG13474 | P{TRIP.HMS01539}attP2  |
| 58240 | CG13482 | FBgn0036419 | CG13482 | P{TRIP.HMJ22261}attP40 |
| 58184 | CG13501 | FBgn0034684 | CG13501 | P{TRIP.HMJ22161}attP40 |
| 53364 | CG13527 | FBgn0034776 | CG13527 | P{TRIP.HMC03593}attP40 |
| 28643 | CG13532 | FBgn0034788 | CG13532 | P{TRIP.JF03058}attP2   |
| 34554 | CG13551 | FBgn0040660 | CG13551 | P{TRIP.HMS01026}attP2  |
| 58135 | CG13559 | FBgn0034870 | CG13559 | P{TRIP.HMJ22084}attP40 |
| 50995 | CG13561 | FBgn0034906 | CG13561 | P{TRIP.HMJ21108}attP40 |
| 56853 | CG13567 | FBgn0034963 | CG13567 | P{TRIP.HMJ02117}attP40 |
| 27241 | CG13568 | FBgn0034965 | CG13568 | P{TRIP.JF02569}attP2   |
| 25827 | CG13575 | FBgn0034996 | CG13575 | P{TRIP.JF01845}attP2   |
| 28644 | CG13579 | FBgn0035010 | CG13579 | P{TRIP.JF03059}attP2   |
| 53933 | CG13585 | FBgn0035020 | CG13585 | P{TRIP.HMJ21281}attP40 |
| 53978 | CG13589 | FBgn0035011 | CG13589 | P{TRIP.HMJ21367}attP40 |
| 40891 | CG13594 | FBgn0035041 | CG13594 | P{TRIP.HMS02139}attP2  |
| 41924 | CG13597 | FBgn0039124 | CG13597 | P{TRIP.HMS02321}attP2  |
| 50558 | CG1360  | FBgn0033195 | CG1360  | P{TRIP.GL01678}attP2   |
| 28597 | CG13604 | FBgn0039137 | CG13604 | P{TRIP.HM05085}attP2   |
| 57749 | CG13618 | FBgn0039203 | CG13618 | P{TRIP.HMC04942}attP40 |
| 25983 | CG13624 | FBgn0039209 | CG13624 | P{TRIP.JF02005}attP2   |
| 51024 | CG13634 | FBgn0039224 | CG13634 | P{TRIP.HMJ21150}attP40 |
| 38362 | CG13636 | FBgn0039232 | CG13636 | P{TRIP.HMS01831}attP2  |
| 56017 | CG13643 | FBgn0040601 | CG13643 | P{TRIP.HMC04313}attP40 |
| 53701 | CG13646 | FBgn0039255 | CG13646 | P{TRIP.HMJ21732}attP40 |
| 58138 | CG13653 | FBgn0039288 | CG13653 | P{TRIP.HMJ22087}attP40 |
| 40870 | CG13676 | FBgn0035844 | CG13676 | P{TRIP.HMS02037}attP2  |
| 53326 | CG13690 | FBgn0031252 | CG13690 | P{TRIP.HMC03555}attP40 |
| 33341 | CG13692 | FBgn0031254 | CG13692 | P{TRIP.HMS00207}attP2  |
| 42895 | CG13716 | FBgn0035563 | CG13716 | P{TRIP.HMS02588}attP40 |
| 33342 | CG13720 | FBgn0035555 | CG13720 | P{TRIP.HMS00208}attP2  |
| 42886 | CG13737 | FBgn0036382 | CG13737 | P{TRIP.HMS02579}attP40 |
| 44030 | CG13739 | FBgn0033403 | CG13739 | P{TRIP.HMS02746}attP40 |
| 36610 | CG13741 | FBgn0033374 | CG13741 | P{TRIP.GL00570}attP2   |
| 41623 | CG13748 | FBgn0033355 | CG13748 | P{TRIP.GL01205}attP40  |
| 51152 | CG13751 | FBgn0033340 | CG13751 | P{TRIP.GL01388}attP2   |
| 31234 | CG13766 | FBgn0031834 | CG13766 | P{TRIP.JF01508}attP2   |
| 57249 | CG13775 | FBgn0031874 | CG13775 | P{TRIP.HMC04639}attP40 |
| 28057 | CG13779 | FBgn0040954 | CG13779 | P{TRIP.JF02893}attP2   |

|       |         |             |         |                        |
|-------|---------|-------------|---------|------------------------|
| 28058 | CG13784 | FBgn0031897 | CG13784 | P(TRIP.JF02894)attP2   |
| 57251 | CG13796 | FBgn0031939 | CG13796 | P(TRIP.HMC04641)attP40 |
| 55965 | CG13806 | FBgn0035325 | CG13806 | P(TRIP.HMC04260)attP40 |
| 54802 | CG13810 | FBgn0035313 | CG13810 | P(TRIP.HMJ21496)attP40 |
| 51009 | CG13827 | FBgn0039068 | CG13827 | P(TRIP.HMJ21125)attP40 |
| 38235 | CG13830 | FBgn0039054 | CG13830 | P(TRIP.HMS01679)attP2  |
| 55980 | CG13837 | FBgn0039042 | CG13837 | P(TRIP.HMC04276)attP40 |
| 42898 | CG13838 | FBgn0039041 | CG13838 | P(TRIP.HMS02591)attP40 |
| 42574 | CG13850 | FBgn0038961 | CG13850 | P(TRIP.HMJ02233)attP40 |
| 44083 | CG13857 | FBgn0038958 | CG13857 | P(TRIP.HMS02800)attP40 |
| 32918 | CG13887 | FBgn0035165 | CG13887 | P(TRIP.HMS00708)attP2  |
| 52950 | CG13891 | FBgn0035139 | CG13891 | P(TRIP.HMJ21619)attP40 |
| 27243 | CG13894 | FBgn0035157 | CG13894 | P(TRIP.JF02547)attP2   |
| 29613 | CG13897 | FBgn0035160 | CG13897 | P(TRIP.JF03292)attP2   |
| 33731 | CG13900 | FBgn0035162 | CG13900 | P(TRIP.HMS00614)attP2  |
| 33702 | CG13902 | FBgn0035166 | CG13902 | P(TRIP.HMS00579)attP2  |
| 28645 | CG13908 | FBgn0035178 | CG13908 | P(TRIP.JF03060)attP2   |
| 42903 | CG13917 | FBgn0035237 | CG13917 | P(TRIP.HMS02596)attP40 |
| 53013 | CG13924 | FBgn0035286 | CG13924 | P(TRIP.HMJ21735)attP40 |
| 28646 | CG13928 | FBgn0035246 | CG13928 | P(TRIP.JF03061)attP2   |
| 42807 | CG13933 | FBgn0035270 | CG13933 | P(TRIP.GL01181)attP2   |
| 44015 | CG13965 | FBgn0032834 | CG13965 | P(TRIP.HMS02729)attP40 |
| 44008 | CG13978 | FBgn0039518 | CG13978 | P(TRIP.HMS02722)attP40 |
| 41686 | CG1399  | FBgn0033212 | CG1399  | P(TRIP.HMS02250)attP2  |
| 26733 | CG13995 | FBgn0031770 | CG13995 | P(TRIP.JF02275)attP2   |
| 41921 | CG13996 | FBgn0031763 | CG13996 | P(TRIP.HMS02318)attP2  |
| 34599 | CG13998 | FBgn0040949 | CG13998 | P(TRIP.HMS01073)attP2  |
| 55177 | CG13999 | FBgn0031753 | CG13999 | P(TRIP.HMC03858)attP40 |
| 57228 | CG14006 | FBgn0031733 | CG14006 | P(TRIP.HMC04612)attP40 |
| 38229 | CG14010 | FBgn0031725 | CG14010 | P(TRIP.HMS01673)attP40 |
| 53993 | CG14011 | FBgn0031722 | CG14011 | P(TRIP.HMJ21397)attP40 |
| 29456 | CG14014 | FBgn0031718 | CG14014 | P(TRIP.JF03392)attP2   |
| 57289 | CG14017 | FBgn0031721 | CG14017 | P(TRIP.HMJ21257)attP40 |
| 56956 | CG1402  | FBgn0029962 | CG1402  | P(TRIP.HMC04396)attP40 |
| 57403 | CG14022 | FBgn0031700 | CG14022 | P(TRIP.HMC04707)attP40 |
| 34964 | CG14023 | FBgn0031698 | CG14023 | P(TRIP.HMS00664)attP2  |
| 33732 | CG14034 | FBgn0250847 | CG14034 | P(TRIP.HMS00615)attP2  |
| 50717 | CG14036 | FBgn0031677 | CG14036 | P(TRIP.HMS02951)attP40 |
| 29555 | CG14042 | FBgn0260451 | CG14042 | P(TRIP.JF03232)attP2   |
| 51858 | CG14043 | FBgn0031659 | CG14043 | P(TRIP.HMC03432)attP40 |
| 27073 | CG14050 | FBgn0040392 | CG14050 | P(TRIP.JF02418)attP2   |
| 44456 | CG14053 | FBgn0029603 | CG14053 | P(TRIP.GLC01608)attP2  |
| 57197 | CG14061 | FBgn0039598 | CG14061 | P(TRIP.HMC04579)attP40 |
| 50601 | CG1407  | FBgn0033474 | CG1407  | P(TRIP.GLC01723)attP2  |
| 50031 | CG1407  | FBgn0033474 | CG1407  | VDRC.50031             |
| 36653 | CG14072 | FBgn0032318 | CG14072 | P(TRIP.GL00613)attP40  |
| 53303 | CG14077 | FBgn0036830 | CG14077 | P(TRIP.HMC03530)attP2  |
| 7563  | CG14077 | FBgn0036830 | CG14077 | VDRC.7563              |
| 58200 | CG1409  | FBgn0029964 | CG1409  | P(TRIP.HMJ22170)attP40 |
| 42959 | CG14101 | FBgn0036905 | CG14101 | P(TRIP.HMS02652)attP40 |
| 42780 | CG14103 | FBgn0036908 | CG14103 | P(TRIP.GL01150)attP2   |
| 27555 | CG14119 | FBgn0036322 | CG14119 | P(TRIP.JF02707)attP2   |
| 44640 | CG14130 | FBgn0036210 | CG14130 | P(TRIP.GLC01613)attP2  |
| 57198 | CG14132 | FBgn0040817 | CG14132 | P(TRIP.HMC04580)attP40 |
| 33343 | CG14137 | FBgn0036178 | CG14137 | P(TRIP.HMS00209)attP2  |
| 54046 | CG14147 | FBgn0036112 | CG14147 | P(TRIP.HMJ21489)attP40 |
| 58254 | CG14153 | FBgn0036094 | CG14153 | P(TRIP.HMJ22317)attP40 |
| 28762 | CG1416  | FBgn0032961 | CG1416  | P(TRIP.JF03190)attP2   |
| 34927 | CG14164 | FBgn0036057 | CG14164 | P(TRIP.HMS01276)attP2  |
| 42874 | CG14168 | FBgn0036044 | CG14168 | P(TRIP.HMS02567)attP40 |
| 50984 | CG14177 | FBgn0036013 | CG14177 | P(TRIP.HMJ21094)attP40 |
| 57277 | CG14183 | FBgn0036931 | CG14183 | P(TRIP.HMC04673)attP40 |
| 29420 | CG14186 | FBgn0036935 | CG14186 | P(TRIP.JF03356)attP2   |
| 55225 | CG14194 | FBgn0030996 | CG14194 | P(TRIP.GLC01842)attP2  |
| 57248 | CG14200 | FBgn0031023 | CG14200 | P(TRIP.HMC04635)attP40 |
| 36899 | CG14222 | FBgn0031043 | CG14222 | P(TRIP.GL01093)attP2   |
| 51412 | CG14230 | FBgn0031062 | CG14230 | P(TRIP.GLC01782)attP40 |
| 43269 | CG14231 | FBgn0031060 | CG14231 | P(TRIP.GLC01458)attP2  |

|        |         |             |         |                        |
|--------|---------|-------------|---------|------------------------|
| 28012  | CG14239 | FBgn0039424 | CG14239 | P(TRIP.JF02846)attP2   |
| 57195  | CG14258 | FBgn0039482 | CG14258 | P(TRIP.HMC04577)attP40 |
| 57196  | CG14259 | FBgn0039483 | CG14259 | P(TRIP.HMC04578)attP40 |
| 53698  | CG14260 | FBgn0039504 | CG14260 | P(TRIP.HMJ21719)attP40 |
| 38911  | CG1427  | FBgn0037347 | CG1427  | P(TRIP.GL00683)attP2   |
| 28763  | CG14274 | FBgn0032023 | CG14274 | P(TRIP.JF03191)attP2   |
| 50715  | CG1428  | FBgn0032967 | CG1428  | P(TRIP.HMS02949)attP40 |
| 57758  | CG14297 | FBgn0038655 | CG14297 | P(TRIP.HMC04951)attP40 |
| 54807  | CG14298 | FBgn0038654 | CG14298 | P(TRIP.HMJ21501)attP40 |
| 35624  | CG14299 | FBgn0038651 | CG14299 | P(TRIP.GL00468)attP2   |
| 57513  | CG14304 | FBgn0038629 | CG14304 | P(TRIP.HMC04828)attP40 |
| 29614  | CG14313 | FBgn0038579 | CG14313 | P(TRIP.JF03293)attP2   |
| 53952  | CG14326 | FBgn0038528 | CG14326 | P(TRIP.HMJ21318)attP40 |
| 54800  | CG14332 | FBgn0038509 | CG14332 | P(TRIP.HMJ21494)attP40 |
| 58163  | CG14339 | FBgn0031301 | CG14339 | P(TRIP.HMJ22114)attP40 |
| 41849  | CG14346 | FBgn0031337 | CG14346 | P(TRIP.GL01277)attP2   |
| 36914  | CG14352 | FBgn0031351 | CG14352 | P(TRIP.GL01123)attP2   |
| 44513  | CG14353 | FBgn0036771 | CG14353 | P(TRIP.HMC02903)attP2  |
| 24860  | CG14353 | FBgn0036771 | CG14353 | VDRC.24860             |
| 42857  | CG14355 | FBgn0038208 | CG14355 | P(TRIP.HMS02549)attP40 |
| 33344  | CG14377 | FBgn0038148 | CG14377 | P(TRIP.HMS00210)attP2  |
| 51420  | CG14394 | FBgn0038079 | CG14394 | P(TRIP.HMC02385)attP2  |
| 44521  | CG1440  | FBgn0030038 | CG1440  | P(TRIP.HMC02912)attP2  |
| 44081  | CG14406 | FBgn0030595 | CG14406 | P(TRIP.HMS02798)attP40 |
| 58217  | CG14410 | FBgn0030583 | CG14410 | P(TRIP.HMJ22225)attP40 |
| 40935  | CG14411 | FBgn0030582 | CG14411 | P(TRIP.HMS02183)attP2  |
| 51047  | CG14416 | FBgn0040352 | CG14416 | P(TRIP.HMJ21181)attP40 |
| 51036  | CG14417 | FBgn0040353 | CG14417 | P(TRIP.HMJ21164)attP40 |
| 28647  | CG14419 | FBgn0029639 | CG14419 | P(TRIP.JF03062)attP2   |
| 31725  | CG14420 | FBgn0029643 | CG14420 | P(TRIP.HMC04034)attP2  |
| 102239 | CG14420 | FBgn0029643 | CG14420 | VDRC.102239            |
| 42865  | CG14421 | FBgn0029644 | CG14421 | P(TRIP.HMS02558)attP40 |
| 41995  | CG14424 | FBgn0025644 | CG14424 | P(TRIP.HMS02396)attP40 |
| 57558  | CG14438 | FBgn0029899 | CG14438 | P(TRIP.HMC04875)attP40 |
| 36607  | CG1444  | FBgn0029975 | CG1444  | P(TRIP.GL00567)attP2   |
| 50932  | CG14441 | FBgn0029895 | CG14441 | P(TRIP.HMJ21026)attP40 |
| 32487  | CG14446 | FBgn0262730 | CG14446 | P(TRIP.HMS00490)attP2  |
| 57278  | CG14451 | FBgn0037183 | CG14451 | P(TRIP.HMC04674)attP40 |
| 57189  | CG14457 | FBgn0037174 | CG14457 | P(TRIP.HMC04571)attP40 |
| 34334  | CG14476 | FBgn0027588 | CG14476 | P(TRIP.HMS01322)attP2  |
| 54040  | CG14478 | FBgn0028953 | CG14478 | P(TRIP.HMJ21483)attP40 |
| 33345  | CG14507 | FBgn0039655 | CG14507 | P(TRIP.HMS00211)attP2  |
| 34916  | CG14508 | FBgn0039651 | CG14508 | P(TRIP.HMS01264)attP2  |
| 28764  | CG14509 | FBgn0039647 | CG14509 | P(TRIP.JF03192)attP2   |
| 51039  | CG14515 | FBgn0039648 | CG14515 | P(TRIP.HMJ21170)attP40 |
| 42947  | CG14516 | FBgn0039640 | CG14516 | P(TRIP.HMS02640)attP40 |
| 51936  | CG14535 | FBgn0031955 | CG14535 | P(TRIP.HMC03285)attP2  |
| 35625  | CG14545 | FBgn0040602 | CG14545 | P(TRIP.GL00470)attP2   |
| 35172  | CG14562 | FBgn0037142 | CG14562 | P(TRIP.GL00042)attP2   |
| 33045  | CG14563 | FBgn0037139 | CG14563 | P(TRIP.HMS00643)attP2  |
| 51050  | CG14572 | FBgn0037128 | CG14572 | P(TRIP.HMJ21184)attP40 |
| 33749  | CG1458  | FBgn0062442 | CG1458  | P(TRIP.HMS01088)attP2  |
| 33925  | CG1458  | FBgn0062442 | CG1458  | VDRC.33925             |
| 51470  | CG1461  | FBgn0030558 | CG1461  | P(TRIP.HMC03212)attP40 |
| 54044  | CG14615 | FBgn0031184 | CG14615 | P(TRIP.HMJ21487)attP40 |
| 57565  | CG14630 | FBgn0014903 | CG14630 | P(TRIP.HMC04882)attP40 |
| 58204  | CG14636 | FBgn0037217 | CG14636 | P(TRIP.HMJ22174)attP40 |
| 53365  | CG14642 | FBgn0037222 | CG14642 | P(TRIP.HMC03594)attP40 |
| 27032  | CG14647 | FBgn0037244 | CG14647 | P(TRIP.JF02358)attP2   |
| 26770  | CG14655 | FBgn0037275 | CG14655 | P(TRIP.JF02334)attP2   |
| 36862  | CG14657 | FBgn0037282 | CG14657 | P(TRIP.GL00519)attP2   |
| 29365  | CG14667 | FBgn0037317 | CG14667 | P(TRIP.JF02529)attP2   |
| 36750  | CG14669 | FBgn0037326 | CG14669 | P(TRIP.HMS03010)attP2  |
| 58303  | CG14671 | FBgn0037340 | CG14671 | P(TRIP.HMJ22410)attP40 |
| 43316  | CG14676 | FBgn0037388 | CG14676 | P(TRIP.HMS02700)attP40 |
| 44571  | CG14683 | FBgn0037822 | CG14683 | P(TRIP.HMS02867)attP40 |
| 31986  | CG14691 | FBgn0037829 | CG14691 | P(TRIP.JF03420)attP2   |
| 42808  | CG14693 | FBgn0037837 | CG14693 | P(TRIP.GL01182)attP2   |

|       |         |             |         |                        |
|-------|---------|-------------|---------|------------------------|
| 53012 | CG14694 | FBgn0037845 | CG14694 | P(TRIP.HMJ21734)attP40 |
| 53020 | CG14708 | FBgn0037910 | CG14708 | P(TRIP.HMJ21743)attP40 |
| 26771 | CG14710 | FBgn0037920 | CG14710 | P(TRIP.JF02335)attP2   |
| 31726 | CG14711 | FBgn0037922 | CG14711 | P(TRIP.HM04035)attP2   |
| 35622 | CG14712 | FBgn0037924 | CG14712 | P(TRIP.GL00466)attP2   |
| 52940 | CG14715 | FBgn0037930 | CG14715 | P(TRIP.HMJ21596)attP40 |
| 39018 | CG14718 | FBgn0037939 | CG14718 | P(TRIP.HMS01936)attP40 |
| 31641 | CG14749 | FBgn0033316 | CG14749 | P(TRIP.JF01431)attP2   |
| 31563 | CG14757 | FBgn0033274 | CG14757 | P(TRIP.JF01136)attP2   |
| 53366 | CG14760 | FBgn0033277 | CG14760 | P(TRIP.HMC03595)attP40 |
| 29615 | CG14762 | FBgn0033250 | CG14762 | P(TRIP.JF03294)attP2   |
| 34679 | CG14767 | FBgn0040777 | CG14767 | P(TRIP.HMS01157)attP2  |
| 57473 | CG14777 | FBgn0026872 | CG14777 | P(TRIP.HMC04784)attP40 |
| 55616 | CG14780 | FBgn0025383 | CG14780 | P(TRIP.HMC03759)attP40 |
| 31137 | CG14782 | FBgn0025381 | CG14782 | P(TRIP.JF01612)attP2   |
| 57748 | CG14785 | FBgn0027795 | CG14785 | P(TRIP.HMC04941)attP40 |
| 57744 | CG14812 | FBgn0026090 | CG14812 | P(TRIP.HMC04937)attP40 |
| 36604 | CG14814 | FBgn0023515 | CG14814 | P(TRIP.GL00564)attP2   |
| 58212 | CG14830 | FBgn0035755 | CG14830 | P(TRIP.HMJ22219)attP40 |
| 51175 | CG14838 | FBgn0035799 | CG14838 | P(TRIP.HMJ21140)attP40 |
| 44059 | CG14841 | FBgn0038218 | CG14841 | P(TRIP.HMS02776)attP40 |
| 57569 | CG14855 | FBgn0038260 | CG14855 | P(TRIP.HMC04886)attP40 |
| 36706 | CG14866 | FBgn0038315 | CG14866 | P(TRIP.HMS01596)attP2  |
| 52916 | CG14870 | FBgn0038342 | CG14870 | P(TRIP.HMC03656)attP40 |
| 57002 | CG14877 | FBgn0038380 | CG14877 | P(TRIP.HMC04445)attP40 |
| 55978 | CG14880 | FBgn0038422 | CG14880 | P(TRIP.HMC04274)attP40 |
| 56006 | CG14882 | FBgn0038429 | CG14882 | P(TRIP.HMC04302)attP40 |
| 44114 | CG14883 | FBgn0038432 | CG14883 | P(TRIP.HMS02836)attP40 |
| 31057 | CG14891 | FBgn0038445 | CG14891 | P(TRIP.JF01505)attP2   |
| 35766 | CG14892 | FBgn0038447 | CG14892 | P(TRIP.HMS01515)attP2  |
| 43225 | CG14893 | FBgn0038451 | CG14893 | P(TRIP.GL01570)attP40  |
| 42763 | CG14894 | FBgn0038428 | CG14894 | P(TRIP.GL00718)attP2   |
| 38949 | CG14903 | FBgn0038446 | CG14903 | P(TRIP.HMC01863)attP2  |
| 54838 | CG1492  | FBgn0030361 | CG1492  | P(TRIP.HMJ21557)attP40 |
| 42771 | CG14931 | FBgn0032374 | CG14931 | P(TRIP.GL00727)attP2   |
| 31483 | CG14937 | FBgn0032377 | CG14937 | P(TRIP.JF01319)attP2   |
| 57777 | CG1494  | FBgn0031169 | CG1494  | P(TRIP.HMC04971)attP40 |
| 32384 | CG14945 | FBgn0032402 | CG14945 | P(TRIP.HMS00376)attP2  |
| 32905 | CG14945 | FBgn0032402 | CG14945 | P(TRIP.HMS00694)attP2  |
| 55966 | CG14957 | FBgn0035412 | CG14957 | P(TRIP.HMC04261)attP40 |
| 26772 | CG14962 | FBgn0035407 | CG14962 | P(TRIP.JF02336)attP2   |
| 31953 | CG14962 | FBgn0035407 | CG14962 | P(TRIP.JF02245)attP2   |
| 50592 | CG14965 | FBgn0035414 | CG14965 | P(TRIP.GL01714)attP2   |
| 34022 | CG14966 | FBgn0035415 | CG14966 | P(TRIP.HMC00992)attP2  |
| 57491 | CG14977 | FBgn0035469 | CG14977 | P(TRIP.HMC04805)attP40 |
| 53367 | CG14990 | FBgn0035496 | CG14990 | P(TRIP.HMC03596)attP40 |
| 53260 | CG14997 | FBgn0035515 | CG14997 | P(TRIP.GL01820)attP2   |
| 31589 | CG15011 | FBgn0035518 | CG15011 | P(TRIP.JF01165)attP2   |
| 38273 | CG15014 | FBgn0035532 | CG15014 | P(TRIP.HMS01722)attP40 |
| 28765 | CG15021 | FBgn0035544 | CG15021 | P(TRIP.JF03193)attP2   |
| 33713 | CG15022 | FBgn0035547 | CG15022 | P(TRIP.HMS00593)attP2  |
| 57215 | CG15035 | FBgn0029949 | CG15035 | P(TRIP.HMC04598)attP40 |
| 28517 | CG1504  | FBgn0031100 | CG1504  | P(TRIP.HM05003)attP2   |
| 44049 | CG15042 | FBgn0030937 | CG15042 | P(TRIP.HMS02765)attP40 |
| 55620 | CG15046 | FBgn0030927 | CG15046 | P(TRIP.HMC03764)attP40 |
| 29366 | CG15073 | FBgn0034379 | CG15073 | P(TRIP.JF02530)attP2   |
| 50508 | CG15083 | FBgn0034399 | CG15083 | P(TRIP.GL01386)attP2   |
| 42958 | CG15084 | FBgn0034402 | CG15084 | P(TRIP.HMS02651)attP40 |
| 57712 | CG15086 | FBgn0034374 | CG15086 | P(TRIP.HMC04901)attP40 |
| 38280 | CG15087 | FBgn0034380 | CG15087 | P(TRIP.HMS01731)attP40 |
| 50548 | CG15087 | FBgn0034380 | CG15087 | P(TRIP.GL01668)attP2   |
| 57736 | CG15093 | FBgn0034390 | CG15093 | P(TRIP.HMC04926)attP40 |
| 38538 | CG15097 | FBgn0034396 | CG15097 | P(TRIP.HMS01790)attP2  |
| 56007 | CG15100 | FBgn0034401 | CG15100 | P(TRIP.HMC04303)attP40 |
| 51885 | CG15111 | FBgn0034419 | CG15111 | P(TRIP.HMC03459)attP40 |
| 56992 | CG15116 | FBgn0034415 | CG15116 | P(TRIP.HMC04434)attP40 |
| 33693 | CG15117 | FBgn0034417 | CG15117 | P(TRIP.HMS00562)attP2  |
| 58112 | CG15124 | FBgn0034461 | CG15124 | P(TRIP.HMJ22048)attP40 |

|       |         |             |         |                        |
|-------|---------|-------------|---------|------------------------|
| 57253 | CG15141 | FBgn0032635 | CG15141 | P{TRIP.HMC04643}attP40 |
| 54837 | CG15145 | FBgn0032649 | CG15145 | P{TRIP.HMJ21556}attP40 |
| 56883 | CG1516  | FBgn0027580 | CG1516  | P{TRIP.HMC04104}attP40 |
| 50721 | CG15167 | FBgn0032709 | CG15167 | P{TRIP.HMS02955}attP40 |
| 31559 | CG15177 | FBgn0037461 | CG15177 | P{TRIP.JF01130}attP2   |
| 53688 | CG15196 | FBgn0030296 | CG15196 | P{TRIP.HMJ21648}attP40 |
| 38876 | CG15196 | FBgn0030296 | CG15196 | VDRC.38876             |
| 56024 | CG15199 | FBgn0030270 | CG15199 | P{TRIP.HMC04320}attP40 |
| 53689 | CG15201 | FBgn0030272 | CG15201 | P{TRIP.HMJ21672}attP40 |
| 56026 | CG15202 | FBgn0030271 | CG15202 | P{TRIP.HMC04322}attP40 |
| 31888 | CG15221 | FBgn0030331 | CG15221 | P{TRIP.JF02166}attP2   |
| 28649 | CG15236 | FBgn0033108 | CG15236 | P{TRIP.JF03064}attP2   |
| 58325 | CG15239 | FBgn0029681 | CG15239 | P{TRIP.HMJ22455}attP40 |
| 58268 | CG15247 | FBgn0030156 | CG15247 | P{TRIP.HMJ22347}attP40 |
| 57271 | CG15262 | FBgn0028852 | CG15262 | P{TRIP.HMC04666}attP40 |
| 51506 | CG15269 | FBgn0028878 | CG15269 | P{TRIP.HMC03273}attP2  |
| 28650 | CG15270 | FBgn0028879 | CG15270 | P{TRIP.JF03065}attP2   |
| 50583 | CG15279 | FBgn0028886 | CG15279 | P{TRIP.GLC01705}attP2  |
| 42946 | CG15296 | FBgn0030215 | CG15296 | P{TRIP.HMS02639}attP40 |
| 29530 | CG15309 | FBgn0030183 | CG15309 | P{TRIP.HM05209}attP2   |
| 42900 | CG1532  | FBgn0031143 | CG1532  | P{TRIP.HMS02593}attP40 |
| 57424 | CG15336 | FBgn0030009 | CG15336 | P{TRIP.HMC04731}attP40 |
| 56911 | CG15356 | FBgn0031377 | CG15356 | P{TRIP.HMS04332}attP40 |
| 58156 | CG15357 | FBgn0040719 | CG15357 | P{TRIP.HMJ22107}attP40 |
| 38313 | CG15358 | FBgn0031373 | CG15358 | P{TRIP.HMS01777}attP40 |
| 53919 | CG15362 | FBgn0031378 | CG15362 | P{TRIP.HMJ21254}attP40 |
| 36856 | CG15365 | FBgn0030077 | CG15365 | P{TRIP.HMS00293}attP2  |
| 58338 | CG15373 | FBgn0030889 | CG15373 | P{TRIP.HMJ22468}attP40 |
| 50952 | CG15387 | FBgn0031403 | CG15387 | P{TRIP.HMJ21053}attP40 |
| 43159 | CG15398 | FBgn0031446 | CG15398 | P{TRIP.GL01501}attP2   |
| 57218 | CG15400 | FBgn0031463 | CG15400 | P{TRIP.HMC04601}attP40 |
| 58239 | CG15408 | FBgn0031523 | CG15408 | P{TRIP.HMJ22260}attP40 |
| 34010 | CG15414 | FBgn0031542 | CG15414 | P{TRIP.HMS00975}attP2  |
| 28631 | CG15423 | FBgn0031580 | CG15423 | P{TRIP.JF03046}attP2   |
| 58088 | CG15432 | FBgn0031603 | CG15432 | P{TRIP.HMJ21981}attP40 |
| 52913 | CG15434 | FBgn0040705 | CG15434 | P{TRIP.HMC03653}attP40 |
| 57867 | CG15436 | FBgn0031610 | CG15436 | P{TRIP.HMC04637}attP40 |
| 33998 | CG15438 | FBgn0025684 | CG15438 | P{TRIP.HMS00961}attP2  |
| 43310 | CG1544  | FBgn0039827 | CG1544  | P{TRIP.HMS02694}attP2  |
| 55230 | CG15440 | FBgn0031607 | CG15440 | P{TRIP.GLC01847}attP2  |
| 42864 | CG15443 | FBgn0031609 | CG15443 | P{TRIP.HMS02557}attP40 |
| 35757 | CG15459 | FBgn0031108 | CG15459 | P{TRIP.HMS01503}attP2  |
| 44024 | CG15479 | FBgn0032493 | CG15479 | P{TRIP.HMS02739}attP2  |
| 31940 | CG15514 | FBgn0039712 | CG15514 | P{TRIP.JF02231}attP2   |
| 28766 | CG15522 | FBgn0039723 | CG15522 | P{TRIP.JF03194}attP2   |
| 52915 | CG15523 | FBgn0039727 | CG15523 | P{TRIP.HMC03655}attP40 |
| 50708 | CG15525 | FBgn0039732 | CG15525 | P{TRIP.HMC03110}attP2  |
| 36761 | CG15533 | FBgn0039768 | CG15533 | P{TRIP.HMS03022}attP2  |
| 36762 | CG15534 | FBgn0039769 | CG15534 | P{TRIP.HMS03023}attP2  |
| 28767 | CG15537 | FBgn0039770 | CG15537 | P{TRIP.JF03195}attP2   |
| 58347 | CG15546 | FBgn0039807 | CG15546 | P{TRIP.HMJ22478}attP40 |
| 28016 | CG15553 | FBgn0039817 | CG15553 | P{TRIP.JF02850}attP2   |
| 26006 | CG15555 | FBgn0039839 | CG15555 | P{TRIP.JF02031}attP2   |
| 44574 | CG15556 | FBgn0039821 | CG15556 | P{TRIP.HMS02870}attP2  |
| 58102 | CG15579 | FBgn0040906 | CG15579 | P{TRIP.HMJ22017}attP40 |
| 42586 | CG15605 | FBgn0034196 | CG15605 | P{TRIP.HMS02418}attP40 |
| 50927 | CG1561  | FBgn0030317 | CG1561  | P{TRIP.HMJ21021}attP40 |
| 31158 | CG15611 | FBgn0034194 | CG15611 | P{TRIP.JF01651}attP2   |
| 58260 | CG15617 | FBgn0034151 | CG15617 | P{TRIP.HMJ22324}attP40 |
| 34555 | CG15628 | FBgn0031632 | CG15628 | P{TRIP.HMS01027}attP2  |
| 42589 | CG15630 | FBgn0031627 | CG15630 | P{TRIP.HMS02421}attP40 |
| 55940 | CG15641 | FBgn0030643 | CG15641 | P{TRIP.HMC04228}attP40 |
| 50593 | CG15646 | FBgn0030665 | CG15646 | P{TRIP.GLC01715}attP2  |
| 29616 | CG15651 | FBgn0034567 | CG15651 | P{TRIP.JF03295}attP2   |
| 28976 | CG15658 | FBgn0034602 | CG15658 | P{TRIP.HM05187}attP2   |
| 57282 | CG15696 | FBgn0038833 | CG15696 | P{TRIP.HMC04679}attP40 |
| 26773 | CG15710 | FBgn0034120 | CG15710 | P{TRIP.JF02337}attP2   |
| 57276 | CG15715 | FBgn0036538 | CG15715 | P{TRIP.HMC04672}attP40 |

|        |         |             |         |                        |
|--------|---------|-------------|---------|------------------------|
| 43164  | CG1572  | FBgn0030309 | CG1572  | P(TRIP.GL01506)attP2   |
| 23220  | CG1572  | FBgn0030309 | CG1572  | VDRC.23220             |
| 50968  | CG15721 | FBgn0030438 | CG15721 | P(TRIP.HMJ21074)attP40 |
| 42002  | CG15730 | FBgn0030395 | CG15730 | P(TRIP.HMS02403)attP40 |
| 19582  | CG15730 | FBgn0030395 | CG15730 | VDRC.19582             |
| 34666  | CG15735 | FBgn0030364 | CG15735 | P(TRIP.HMS01143)attP2  |
| 55332  | CG15738 | FBgn0030352 | CG15738 | P(TRIP.HMC04019)attP40 |
| 103029 | CG15738 | FBgn0030352 | CG15738 | VDRC.103029            |
| 57216  | CG15739 | FBgn0030347 | CG15739 | P(TRIP.HMC04599)attP40 |
| 51486  | CG15743 | FBgn0030465 | CG15743 | P(TRIP.HMC03233)attP40 |
| 42685  | CG15743 | FBgn0030465 | CG15743 | VDRC.42685             |
| 42497  | CG15744 | FBgn0030466 | CG15744 | P(TRIP.HMJ02061)attP40 |
| 55747  | CG15747 | FBgn0030474 | CG15747 | P(TRIP.HMC03934)attP40 |
| 29421  | CG15765 | FBgn0029814 | CG15765 | P(TRIP.JF03357)attP2   |
| 57214  | CG15771 | FBgn0029801 | CG15771 | P(TRIP.HMC04597)attP40 |
| 36901  | CG1578  | FBgn0030336 | CG1578  | P(TRIP.GL01097)attP2   |
| 34529  | CG15784 | FBgn0029766 | CG15784 | P(TRIP.HMS00983)attP2  |
| 51449  | CG15803 | FBgn0038606 | CG15803 | P(TRIP.HMC03179)attP2  |
| 28356  | CG15817 | FBgn0028476 | CG15817 | P(TRIP.JF02992)attP2   |
| 55373  | CG1582  | FBgn0030246 | CG1582  | P(TRIP.HMC04061)attP40 |
| 19617  | CG1582  | FBgn0030246 | CG1582  | VDRC.19617             |
| 57292  | CG15824 | FBgn0031292 | CG15824 | P(TRIP.HMJ21321)attP40 |
| 44437  | CG15841 | FBgn0046212 | CG15841 | P(TRIP.GLC01401)attP40 |
| 55231  | CG15881 | FBgn0036909 | CG15881 | P(TRIP.GLC01848)attP2  |
| 35751  | CG15887 | FBgn0038132 | CG15887 | P(TRIP.HMS01494)attP2  |
| 28768  | CG15890 | FBgn0030576 | CG15890 | P(TRIP.JF03196)attP2   |
| 42945  | CG15891 | FBgn0029860 | CG15891 | P(TRIP.HMS02638)attP40 |
| 42945  | CG15892 | FBgn0029859 | CG15892 | P(TRIP.HMS02638)attP40 |
| 57274  | CG15912 | FBgn0029712 | CG15912 | P(TRIP.HMC04669)attP40 |
| 42008  | CG15916 | FBgn0030704 | CG15916 | P(TRIP.HMS02409)attP40 |
| 53289  | CG15923 | FBgn0038814 | CG15923 | P(TRIP.HMC03505)attP40 |
| 36882  | CG15930 | FBgn0029754 | CG15930 | P(TRIP.GL01046)attP2   |
| 50699  | CG1597  | FBgn0030289 | CG1597  | P(TRIP.HMC03101)attP2  |
| 38300  | CG1599  | FBgn0033452 | CG1599  | P(TRIP.HMS01762)attP40 |
| 31920  | CG1602  | FBgn0033186 | CG1602  | P(TRIP.JF02210)attP2   |
| 27063  | CG1603  | FBgn0033185 | CG1603  | P(TRIP.JF02408)attP2   |
| 57797  | CG1607  | FBgn0039844 | CG1607  | P(TRIP.HMC04991)attP40 |
| 55648  | CG1622  | FBgn0030468 | CG1622  | P(TRIP.HMC03797)attP40 |
| 54464  | CG1628  | FBgn0030218 | CG1628  | P(TRIP.HMC03731)attP40 |
| 47475  | CG1628  | FBgn0030218 | CG1628  | VDRC.47475             |
| 53368  | CG1632  | FBgn0030027 | CG1632  | P(TRIP.HMC03597)attP40 |
| 32508  | CG1636  | FBgn0030030 | CG1636  | P(TRIP.HMS00512)attP2  |
| 33733  | CG1637  | FBgn0030245 | CG1637  | P(TRIP.HMS00616)attP2  |
| 55292  | CG1647  | FBgn0039602 | CG1647  | P(TRIP.HMC03979)attP2  |
| 42490  | CG1657  | FBgn0030286 | CG1657  | P(TRIP.HMJ02054)attP40 |
| 27078  | CG1663  | FBgn0033449 | CG1663  | P(TRIP.JF02424)attP2   |
| 31565  | CG1667  | FBgn0033453 | CG1667  | P(TRIP.JF01138)attP2   |
| 50944  | CG16704 | FBgn0031558 | CG16704 | P(TRIP.HMJ21042)attP40 |
| 41631  | CG16712 | FBgn0031561 | CG16712 | P(TRIP.GL01213)attP40  |
| 57434  | CG16727 | FBgn0038719 | CG16727 | P(TRIP.HMC04741)attP40 |
| 38363  | CG1673  | FBgn0030482 | CG1673  | P(TRIP.HMS01832)attP2  |
| 50571  | CG16742 | FBgn0034529 | CG16742 | P(TRIP.GLC01693)attP2  |
| 44096  | CG16749 | FBgn0037678 | CG16749 | P(TRIP.HMS02816)attP2  |
| 55355  | CG1677  | FBgn0029941 | CG1677  | P(TRIP.HMC04042)attP40 |
| 44042  | CG16771 | FBgn0032779 | CG16771 | P(TRIP.HMS02758)attP2  |
| 6386   | CG16771 | FBgn0032779 | CG16771 | VDRC.6386              |
| 34651  | CG16778 | FBgn0003715 | CG16778 | P(TRIP.HMS01126)attP2  |
| 51756  | CG16779 | FBgn0037698 | CG16779 | P(TRIP.HMC03308)attP2  |
| 41862  | CG16817 | FBgn0037728 | CG16817 | P(TRIP.GL01292)attP2   |
| 56027  | CG16820 | FBgn0032495 | CG16820 | P(TRIP.HMC04323)attP40 |
| 53973  | CG16825 | FBgn0032503 | CG16825 | P(TRIP.HMJ21358)attP40 |
| 51453  | CG16838 | FBgn0036574 | CG16838 | P(TRIP.HMC03187)attP2  |
| 31974  | CG16857 | FBgn0028482 | CG16857 | P(TRIP.JF03408)attP2   |
| 57272  | CG16863 | FBgn0028931 | CG16863 | P(TRIP.HMC04667)attP40 |
| 29617  | CG16868 | FBgn0034498 | CG16868 | P(TRIP.JF03296)attP2   |
| 25809  | CG1688  | FBgn0027589 | CG1688  | P(TRIP.JF01827)attP2   |
| 50671  | CG16890 | FBgn0028932 | CG16890 | P(TRIP.HMC03072)attP2  |
| 51938  | CG16892 | FBgn0030122 | CG16892 | P(TRIP.HMC03342)attP40 |

|       |         |             |         |                        |
|-------|---------|-------------|---------|------------------------|
| 36671 | CG16935 | FBgn0033883 | CG16935 | P{TRiP.HMS01559}attP40 |
| 56859 | CG16940 | FBgn0035111 | CG16940 | P{TRiP.HMC03037}attP2  |
| 34840 | CG16941 | FBgn0038464 | CG16941 | P{TRiP.HMS00157}attP2  |
| 58099 | CG16947 | FBgn0031816 | CG16947 | P{TRiP.HMJ22014}attP40 |
| 57164 | CG16952 | FBgn0030701 | CG16952 | P{TRiP.HMC04545}attP40 |
| 42590 | CG16974 | FBgn0032479 | CG16974 | P{TRiP.HMS02422}attP40 |
| 51017 | CG16989 | FBgn0025621 | CG16989 | P{TRiP.HMJ21141}attP40 |
| 55942 | CG16995 | FBgn0031412 | CG16995 | P{TRiP.HMC04230}attP40 |
| 42923 | CG16998 | FBgn0035795 | CG16998 | P{TRiP.HMS02616}attP40 |
| 56989 | CG1701  | FBgn0033167 | CG1701  | P{TRiP.HMC04431}attP40 |
| 57229 | CG17010 | FBgn0032424 | CG17010 | P{TRiP.HMC04613}attP40 |
| 57024 | CG17018 | FBgn0039972 | CG17018 | P{TRiP.HMS04468}attP40 |
| 51701 | CG17027 | FBgn0036553 | CG17027 | P{TRiP.HMC03174}attP2  |
| 53320 | CG17028 | FBgn0036552 | CG17028 | P{TRiP.HMC03549}attP2  |
| 51868 | CG17036 | FBgn0032449 | CG17036 | P{TRiP.HMC03442}attP40 |
| 43982 | CG17059 | FBgn0040754 | CG17059 | P{TRiP.GLC01433}attP2  |
| 57870 | CG17068 | FBgn0031098 | CG17068 | P{TRiP.HMC04855}attP40 |
| 44452 | CG17078 | FBgn0086855 | CG17078 | P{TRiP.GLC01604}attP2  |
| 52642 | CG17078 | FBgn0086855 | CG17078 | VDRC.52642             |
| 56901 | CG17097 | FBgn0265264 | CG17097 | P{TRiP.HMC04122}attP40 |
| 50950 | CG17098 | FBgn0032276 | CG17098 | P{TRiP.HMJ21051}attP40 |
| 42925 | CG17104 | FBgn0040496 | CG17104 | P{TRiP.HMS02618}attP40 |
| 33057 | CG17107 | FBgn0032281 | CG17107 | P{TRiP.HMS00717}attP2  |
| 43313 | CG17108 | FBgn0032285 | CG17108 | P{TRiP.HMS02697}attP2  |
| 54033 | CG17109 | FBgn0039051 | CG17109 | P{TRiP.HMJ21476}attP40 |
| 53304 | CG17118 | FBgn0032291 | CG17118 | P{TRiP.HMC03531}attP2  |
| 40823 | CG17119 | FBgn0039045 | CG17119 | P{TRiP.HMS00213}attP2  |
| 54830 | CG17121 | FBgn0039043 | CG17121 | P{TRiP.HMJ21549}attP40 |
| 42868 | CG17134 | FBgn0032304 | CG17134 | P{TRiP.HMS02561}attP40 |
| 26007 | CG17139 | FBgn0260454 | CG17139 | P{TRiP.JF02032}attP2   |
| 26007 | CG17140 | FBgn0260453 | CG17140 | P{TRiP.JF02032}attP2   |
| 55974 | CG17145 | FBgn0036953 | CG17145 | P{TRiP.HMC04269}attP40 |
| 27245 | CG17167 | FBgn0039941 | CG17167 | P{TRiP.JF02560}attP2   |
| 55703 | CG17168 | FBgn0039943 | CG17168 | P{TRiP.HMC03926}attP40 |
| 38353 | CG1718  | FBgn0031170 | CG1718  | P{TRiP.HMS01821}attP40 |
| 26775 | CG17181 | FBgn0035144 | CG17181 | P{TRiP.JF02339}attP2   |
| 51517 | CG17181 | FBgn0035144 | CG17181 | P{TRiP.HMS03165}attP2  |
| 27079 | CG17186 | FBgn0038741 | CG17186 | P{TRiP.JF02425}attP2   |
| 55702 | CG17187 | FBgn0037882 | CG17187 | P{TRiP.HMC03923}attP40 |
| 57764 | CG17189 | FBgn0039485 | CG17189 | P{TRiP.HMC04957}attP40 |
| 56042 | CG17192 | FBgn0039472 | CG17192 | P{TRiP.HMC04350}attP40 |
| 50546 | CG17209 | FBgn0030687 | CG17209 | P{TRiP.GLC01666}attP2  |
| 28769 | CG17219 | FBgn0031494 | CG17219 | P{TRiP.JF03197}attP2   |
| 57162 | CG17230 | FBgn0046225 | CG17230 | P{TRiP.HMC04543}attP40 |
| 55611 | CG17234 | FBgn0042187 | CG17234 | P{TRiP.HMC03750}attP40 |
| 55336 | CG17239 | FBgn0042186 | CG17239 | P{TRiP.HMC04023}attP40 |
| 55198 | CG17242 | FBgn0250841 | CG17242 | P{TRiP.HMC03896}attP40 |
| 34992 | CG17259 | FBgn0031497 | CG17259 | P{TRiP.HMS01402}attP2  |
| 36687 | CG17265 | FBgn0031488 | CG17265 | P{TRiP.HMS01575}attP2  |
| 58350 | CG17266 | FBgn0033089 | CG17266 | P{TRiP.HMS04330}attP40 |
| 42756 | CG17270 | FBgn0038828 | CG17270 | P{TRiP.GLC00711}attP2  |
| 44480 | CG17271 | FBgn0038829 | CG17271 | P{TRiP.HMC02370}attP40 |
| 33993 | CG17273 | FBgn0027493 | CG17273 | P{TRiP.HMS00956}attP2  |
| 56959 | CG17292 | FBgn0032029 | CG17292 | P{TRiP.HMC04400}attP40 |
| 29422 | CG1732  | FBgn0039915 | CG1732  | P{TRiP.JF03358}attP2   |
| 29618 | CG17321 | FBgn0032719 | CG17321 | P{TRiP.JF03297}attP2   |
| 58232 | CG17323 | FBgn0032713 | CG17323 | P{TRiP.HMJ22252}attP40 |
| 28898 | CG17328 | FBgn0028895 | CG17328 | P{TRiP.HM05108}attP2   |
| 32390 | CG17331 | FBgn0032596 | CG17331 | P{TRiP.HMS00384}attP2  |
| 42933 | CG17333 | FBgn0030239 | CG17333 | P{TRiP.HMS02626}attP40 |
| 26776 | CG17359 | FBgn0036396 | CG17359 | P{TRiP.JF02340}attP2   |
| 57714 | CG17361 | FBgn0036395 | CG17361 | P{TRiP.HMC04903}attP40 |
| 58319 | CG17364 | FBgn0036391 | CG17364 | P{TRiP.HMJ22444}attP40 |
| 41973 | CG17380 | FBgn0039077 | CG17380 | P{TRiP.HMS02371}attP2  |
| 33734 | CG17385 | FBgn0033934 | CG17385 | P{TRiP.HMS00617}attP2  |
| 25956 | CG17386 | FBgn0033936 | CG17386 | P{TRiP.JF01976}attP2   |
| 53273 | CG17387 | FBgn0037276 | CG17387 | P{TRiP.HMC03489}attP40 |
| 53370 | CG17404 | FBgn0038001 | CG17404 | P{TRiP.HMC03599}attP40 |

|        |                 |                         |                 |                        |
|--------|-----------------|-------------------------|-----------------|------------------------|
| 51843  | CG17440         | FBgn0030120             | CG17440         | P(TRIP.HMC03416)attP2  |
| 43199  | CG17454         | FBgn0039977             | CG17454         | P(TRIP.GL01543)attP40  |
| 35464  | CG1746          | FBgn0039830             | CG1746          | P(TRIP.GL00390)attP2   |
| 35660  | CG17471         | FBgn0039924             | CG17471         | P(TRIP.GLV21025)attP2  |
| 52895  | CG17475         | FBgn0038481             | CG17475         | P(TRIP.HMC03634)attP40 |
| 42821  | CG17477         | FBgn0038479             | CG17477         | P(TRIP.HMS02503)attP40 |
| 34363  | CG1749          | FBgn0030305             | CG1749          | P(TRIP.HMS01352)attP2  |
| 32509  | CG17494         | FBgn0040011             | CG17494         | P(TRIP.HMS00513)attP2  |
| 34355  | CG17514         | FBgn0039959             | CG17514         | P(TRIP.HMS01344)attP2  |
| 42575  | CG17528         | FBgn0261387             | CG17528         | P(TRIP.HMJ02234)attP40 |
| 51404  | CG17528         | FBgn0261387             | CG17528         | P(TRIP.GLC01767)attP2  |
| 53029  | CG17565         | FBgn0038424             | CG17565         | P(TRIP.HMJ21755)attP40 |
| 31955  | CG17568         | FBgn0032763             | CG17568         | P(TRIP.JF02247)attP2   |
| 55408  | CG17571         | FBgn0259998             | CG17571         | P(TRIP.HMC04096)attP40 |
| 55958  | CG17575         | FBgn0250842             | CG17575         | P(TRIP.HMC04247)attP40 |
| 28344  | CG17593         | FBgn0031544             | CG17593         | P(TRIP.JF02980)attP2   |
| 52886  | CG17597         | FBgn0032715             | CG17597         | P(TRIP.HMC03624)attP40 |
| 38345  | CG17598         | FBgn0031194             | CG17598         | P(TRIP.HMS01812)attP2  |
| 57540  | CG17612         | FBgn0031597             | CG17612         | P(TRIP.HMC04857)attP40 |
| 26008  | CG17646         | FBgn0031362             | CG17646         | P(TRIP.JF02033)attP2   |
| 55287  | CG17652         | FBgn0031361             | CG17652         | P(TRIP.HMC03974)attP2  |
| 35661  | CG17658         | FBgn0034924             | CG17658         | P(TRIP.GLV21026)attP2  |
| 25924  | CG17664         | FBgn0034883             | CG17664         | P(TRIP.JF01944)attP2   |
| 35733  | CG17698         | FBgn0040056             | CG17698         | P(TRIP.HMS01475)attP2  |
| 53371  | CG1773          | FBgn0033439             | CG1773          | P(TRIP.HMC03600)attP40 |
| 55232  | CG17737         | FBgn0035423             | CG17737         | P(TRIP.GLC01849)attP2  |
| 28770  | CG17739         | FBgn0033710             | CG17739         | P(TRIP.JF03198)attP2   |
| 33347  | CG17746         | FBgn0035425             | CG17746         | P(TRIP.HMS00214)attP2  |
| 38539  | CG17754         | FBgn0030114             | CG17754         | P(TRIP.HMS01830)attP2  |
| 55156  | CG17764         | FBgn0029751             | CG17764         | P(TRIP.HMC03829)attP40 |
| 44119  | CG17780         | FBgn0039197             | CG17780         | P(TRIP.HMS02841)attP40 |
| 43233  | CG17802         | FBgn0038549             | CG17802         | P(TRIP.GLC01420)attP2  |
| 29367  | CG17803         | FBgn0038547             | CG17803         | P(TRIP.JF02531)attP2   |
| 31956  | CG17806         | FBgn0038548             | CG17806         | P(TRIP.JF02248)attP2   |
| 50898  | CG17821         | FBgn0034383             | CG17821         | P(TRIP.HMC02424)attP2  |
| 55951  | CG17826         | FBgn0036227             | CG17826         | P(TRIP.HMC04240)attP40 |
| 44104  | CG17829         | FBgn0025635             | CG17829         | P(TRIP.HMS02824)attP40 |
| 38291  | CG17840         | FBgn0031611             | CG17840         | P(TRIP.HMS01749)attP40 |
| 34948  | CG17841         | FBgn0028480             | CG17841         | P(TRIP.HMS00305)attP2  |
| 28023  | CG17843         | FBgn0038919             | CG17843         | P(TRIP.JF02857)attP2   |
| 102838 | CG17843         | FBgn0038919             | CG17843         | VDRC.102838            |
| 55631  | CG17856         | FBgn0039576             | CG17856         | P(TRIP.HMC03778)attP40 |
| 102408 | CG17856         | FBgn0039576             | CG17856         | VDRC.102408            |
| 55323  | CG17896         | FBgn0023537             | CG17896         | P(TRIP.HMC04010)attP40 |
| 5581   | CG17896         | FBgn0023537             | CG17896         | VDRC.5581              |
| 35767  | CG17906         | FBgn0032086             | CG17906         | P(TRIP.HMS01516)attP2  |
| 51727  | CG1791          | FBgn0030163             | CG1791          | P(TRIP.HMC03271)attP2  |
| 27996  | CG17912         | FBgn0032600             | CG17912         | P(TRIP.JF02830)attP2   |
| 26709  | CG1792          | FBgn0039860             | CG1792          | P(TRIP.JF02249)attP2   |
| 26009  | CG17922         | FBgn0034656             | CG17922         | P(TRIP.JF02034)attP2   |
| 53690  | CG17944         | FBgn0037500             | CG17944         | P(TRIP.HMJ21673)attP40 |
| 36907  | CG17985         | FBgn0033199             | CG17985         | P(TRIP.GL01115)attP2   |
| 50900  | CG18011         | FBgn0033491             | CG18011         | P(TRIP.HMJ03118)attP40 |
| 53286  | CG18012         | FBgn0038552             | CG18012         | P(TRIP.HMC03502)attP40 |
| 52896  | CG18065,CG13430 | FBgn0034519,FBgn0034518 | CG18065,CG13430 | P(TRIP.HMC03635)attP40 |
| 55383  | CG18067         | FBgn0034512             | CG18067         | P(TRIP.HMC04071)attP40 |
| 44016  | CG1809          | FBgn0033423             | CG1809          | P(TRIP.HMS02731)attP40 |
| 38521  | CG18095         | FBgn0028872             | CG18095         | P(TRIP.HMS01705)attP40 |
| 44562  | CG18107         | FBgn0034330             | CG18107         | P(TRIP.HMS02858)attP40 |
| 25810  | CG18110         | FBgn0039677             | CG18110         | P(TRIP.JF01828)attP2   |
| 38974  | CG1812          | FBgn0031119             | CG1812          | P(TRIP.HMS01890)attP40 |
| 36812  | CG1815          | FBgn0039863             | CG1815          | P(TRIP.GL01030)attP2   |
| 52884  | CG18155         | FBgn0029945             | CG18155         | P(TRIP.HMC03622)attP40 |
| 34101  | CG18170         | FBgn0035239             | CG18170         | P(TRIP.HMS01006)attP2  |
| 32927  | CG18178         | FBgn0036035             | CG18178         | P(TRIP.HMS00719)attP2  |
| 51451  | CG18179         | FBgn0036023             | CG18179         | P(TRIP.HMC03181)attP2  |
| 55680  | CG18180         | FBgn0036024             | CG18180         | P(TRIP.HMC03862)attP40 |
| 50678  | CG18208         | FBgn0038653             | CG18208         | P(TRIP.HMC03079)attP2  |



|       |         |             |         |                        |
|-------|---------|-------------|---------|------------------------|
| 41848 | CG18213 | FBgn0038470 | CG18213 | P{TRiP.GL01276}attP2   |
| 51173 | CG18234 | FBgn0265268 | CG18234 | P{TRiP.HMJ21135}attP40 |
| 28521 | CG18249 | FBgn0037553 | CG18249 | P{TRiP.HM05007}attP2   |
| 34081 | CG18259 | FBgn0030956 | CG18259 | P{TRiP.HMS01089}attP2  |
| 38324 | CG1826  | FBgn0030228 | CG1826  | P{TRiP.HMS01788}attP2  |
| 33348 | CG18262 | FBgn0030012 | CG18262 | P{TRiP.HMS00215}attP2  |
| 28560 | CG18265 | FBgn0036725 | CG18265 | P{TRiP.HM05046}attP2   |
| 28607 | CG18278 | FBgn0033836 | CG18278 | P{TRiP.HM05095}attP2   |
| 58222 | CG18281 | FBgn0037003 | CG18281 | P{TRiP.HMJ22230}attP40 |
| 57200 | CG18284 | FBgn0043825 | CG18284 | P{TRiP.HMC04582}attP40 |
| 27080 | CG1832  | FBgn0032979 | CG1832  | P{TRiP.JF02426}attP2   |
| 34720 | CG18324 | FBgn0033905 | CG18324 | P{TRiP.HMS01199}attP2  |
| 34890 | CG18347 | FBgn0260743 | CG18347 | P{TRiP.HMS01235}attP2  |
| 57516 | CG18371 | FBgn0033893 | CG18371 | P{TRiP.HMC04831}attP40 |
| 53254 | CG1840  | FBgn0030351 | CG1840  | P{TRiP.GL_C01814}attP2 |
| 33735 | CG18446 | FBgn0033458 | CG18446 | P{TRiP.HMS00618}attP2  |
| 44490 | CG1847  | FBgn0030345 | CG1847  | P{TRiP.HMC02409}attP2  |
| 57524 | CG18473 | FBgn0037683 | CG18473 | P{TRiP.HMC04839}attP40 |
| 26710 | CG18476 | FBgn0037931 | CG18476 | P{TRiP.JF02250}attP2   |
| 28529 | CG18480 | FBgn0028518 | CG18480 | P{TRiP.HM05015}attP2   |
| 51046 | CG1850  | FBgn0033154 | CG1850  | P{TRiP.HMJ21179}attP40 |
| 35033 | CG18507 | FBgn0028527 | CG18507 | P{TRiP.HMS01447}attP2  |
| 36593 | CG18528 | FBgn0039189 | CG18528 | P{TRiP.GL00553}attP2   |
| 53960 | CG18537 | FBgn0034323 | CG18537 | P{TRiP.HMJ21342}attP40 |
| 34391 | CG18549 | FBgn0038053 | CG18549 | P{TRiP.HMS01385}attP2  |
| 6098  | CG18549 | FBgn0038053 | CG18549 | VDRC.6098              |
| 53373 | CG18557 | FBgn0031470 | CG18557 | P{TRiP.HMC03602}attP40 |
| 41974 | CG18563 | FBgn0032639 | CG18563 | P{TRiP.HMS02372}attP2  |
| 58143 | CG18585 | FBgn0031929 | CG18585 | P{TRiP.HMJ22093}attP40 |
| 55270 | CG18586 | FBgn0035642 | CG18586 | P{TRiP.HMC03957}attP40 |
| 57446 | CG18599 | FBgn0038592 | CG18599 | P{TRiP.HMC04754}attP40 |
| 58233 | CG18605 | FBgn0034411 | CG18605 | P{TRiP.HMJ22253}attP40 |
| 44510 | CG18609 | FBgn0034382 | CG18609 | P{TRiP.HMC02900}attP2  |
| 32957 | CG18616 | FBgn0260444 | CG18616 | P{TRiP.HMS00751}attP2  |
| 29542 | CG18619 | FBgn0032202 | CG18619 | P{TRiP.JF02401}attP2   |
| 58322 | CG18624 | FBgn0029971 | CG18624 | P{TRiP.HMJ22452}attP40 |
| 56995 | CG18628 | FBgn0036091 | CG18628 | P{TRiP.HMC04437}attP40 |
| 44492 | CG18641 | FBgn0031426 | CG18641 | P{TRiP.HMC02414}attP2  |
| 36710 | CG18662 | FBgn0040963 | CG18662 | P{TRiP.HMS01600}attP2  |
| 53375 | CG18735 | FBgn0042098 | CG18735 | P{TRiP.HMC03604}attP40 |
| 55348 | CG18754 | FBgn0042106 | CG18754 | P{TRiP.HMC04035}attP40 |
| 42580 | CG18769 | FBgn0042185 | CG18769 | P{TRiP.HMS01927}attP40 |
| 51761 | CG18787 | FBgn0042125 | CG18787 | P{TRiP.HMC03313}attP2  |
| 51761 | CG18789 | FBgn0042127 | CG18789 | P{TRiP.HMC03313}attP2  |
| 55399 | CG18809 | FBgn0042132 | CG18809 | P{TRiP.HMC04087}attP2  |
| 42777 | CG18812 | FBgn0042135 | CG18812 | P{TRiP.GL01147}attP2   |
| 42957 | CG1882  | FBgn0033226 | CG1882  | P{TRiP.HMS02650}attP40 |
| 51786 | CG1885  | FBgn0030066 | CG1885  | P{TRiP.HMC03341}attP40 |
| 55401 | CG1887  | FBgn0035290 | CG1887  | P{TRiP.HMC04089}attP2  |
| 51512 | CG1889  | FBgn0030164 | CG1889  | P{TRiP.HMC03288}attP2  |
| 31573 | CG1890  | FBgn0039869 | CG1890  | P{TRiP.JF01146}attP2   |
| 34925 | CG1894  | FBgn0039585 | CG1894  | P{TRiP.HMS01274}attP2  |
| 38998 | CG1907  | FBgn0039674 | CG1907  | P{TRiP.HMS01914}attP2  |
| 31734 | CG1908  | FBgn0030274 | CG1908  | P{TRiP.HM04043}attP2   |
| 28024 | CG1909  | FBgn0039911 | CG1909  | P{TRiP.JF02858}attP2   |
| 44538 | CG1909  | FBgn0039911 | CG1909  | P{TRiP.HMC02933}attP40 |
| 44082 | CG1910  | FBgn0022349 | CG1910  | P{TRiP.HMS02799}attP40 |
| 35375 | CG1951  | FBgn0039623 | CG1951  | P{TRiP.GL00289}attP2   |
| 56973 | CG1965  | FBgn0037466 | CG1965  | P{TRiP.HMC04413}attP40 |
| 50616 | CG1969  | FBgn0039690 | CG1969  | P{TRiP.HMC02983}attP2  |
| 50616 | CG1969  | FBgn0039690 | CG1969  | P{TRiP.HMC02983}attP2  |
| 28573 | CG1970  | FBgn0039909 | CG1970  | P{TRiP.HM05059}attP2   |
| 44064 | CG1983  | FBgn0039751 | CG1983  | P{TRiP.HMS02781}attP40 |
| 51699 | CG2003  | FBgn0039886 | CG2003  | P{TRiP.HMC03148}attP2  |
| 31063 | CG2010  | FBgn0039667 | CG2010  | P{TRiP.JF01513}attP2   |
| 28771 | CG2016  | FBgn0250839 | CG2016  | P{TRiP.JF03199}attP2   |
| 34097 | CG2017  | FBgn0037391 | CG2017  | P{TRiP.HMS00976}attP2  |
| 28579 | CG2021  | FBgn0035271 | CG2021  | P{TRiP.HM05066}attP2   |

|        |        |             |        |                         |
|--------|--------|-------------|--------|-------------------------|
| 34693  | CG2023 | FBgn0037383 | CG2023 | P( TRIP.HMS01172)attP2  |
| 58279  | CG2025 | FBgn0030344 | CG2025 | P( TRIP.HMJ22363)attP40 |
| 42762  | CG2034 | FBgn0015359 | CG2034 | P( TRIP.GL00717)attP2   |
| 42488  | CG2051 | FBgn0037376 | CG2051 | P( TRIP.HMJ02050)attP40 |
| 42519  | CG2061 | FBgn0027498 | CG2061 | P( TRIP.HMJ02085)attP40 |
| 55173  | CG2063 | FBgn0033400 | CG2063 | P( TRIP.HMC03853)attP40 |
| 33692  | CG2064 | FBgn0033205 | CG2064 | P( TRIP.HMS00560)attP2  |
| 34098  | CG2065 | FBgn0033204 | CG2065 | P( TRIP.HMS00984)attP2  |
| 44532  | CG2070 | FBgn0033203 | CG2070 | P( TRIP.HMC02926)attP40 |
| 51900  | CG2107 | FBgn0035383 | CG2107 | P( TRIP.HMC03474)attP40 |
| 62455  | CG2107 | FBgn0035383 | CG2107 | P( TRIP.HMJ23935)attP40 |
| 41969  | CG2111 | FBgn0030223 | CG2111 | P( TRIP.HMS02366)attP2  |
| 42512  | CG2116 | FBgn0030003 | CG2116 | P( TRIP.HMJ02077)attP40 |
| 40874  | CG2118 | FBgn0039877 | CG2118 | P( TRIP.HMS02041)attP40 |
| 51014  | CG2121 | FBgn0033289 | CG2121 | P( TRIP.HMJ21133)attP40 |
| 40868  | CG2124 | FBgn0030217 | CG2124 | P( TRIP.HMS02035)attP40 |
| 51424  | CG2126 | FBgn0039876 | CG2126 | P( TRIP.HMC02894)attP2  |
| 57423  | CG2129 | FBgn0030008 | CG2129 | P( TRIP.HMC04730)attP40 |
| 57515  | CG2144 | FBgn0033187 | CG2144 | P( TRIP.HMC04830)attP40 |
| 55162  | CG2177 | FBgn0039902 | CG2177 | P( TRIP.HMC03837)attP40 |
| 33750  | CG2186 | FBgn0030243 | CG2186 | P( TRIP.HMS01090)attP2  |
| 105328 | CG2186 | FBgn0030243 | CG2186 | VDRC.105328             |
| 27082  | CG2199 | FBgn0035213 | CG2199 | P( TRIP.JF02428)attP2   |
| 35403  | CG2201 | FBgn0032955 | CG2201 | P( TRIP.GL00323)attP2   |
| 26241  | CG2202 | FBgn0030240 | CG2202 | P( TRIP.JF02139)attP2   |
| 29619  | CG2225 | FBgn0032957 | CG2225 | P( TRIP.JF03298)attP2   |
| 41694  | CG2246 | FBgn0039790 | CG2246 | P( TRIP.HMS02259)attP2  |
| 24987  | CG2246 | FBgn0039790 | CG2246 | VDRC.24987              |
| 31486  | CG2247 | FBgn0030320 | CG2247 | P( TRIP.JF01328)attP2   |
| 43417  | CG2247 | FBgn0030320 | CG2247 | VDRC.43417              |
| 36731  | CG2254 | FBgn0029994 | CG2254 | P( TRIP.HMS01622)attP2  |
| 36850  | CG2258 | FBgn0029997 | CG2258 | P( TRIP.GL01108)attP2   |
| 50624  | CG2263 | FBgn0030007 | CG2263 | P( TRIP.HMC02991)attP2  |
| 51875  | CG2292 | FBgn0033479 | CG2292 | P( TRIP.HMC03449)attP40 |
| 51500  | CG2292 | FBgn0033479 | CG2292 | VDRC.51500              |
| 41984  | CG2316 | FBgn0039890 | CG2316 | P( TRIP.HMS02382)attP2  |
| 58108  | CG2444 | FBgn0030326 | CG2444 | P( TRIP.HMJ22044)attP40 |
| 33736  | CG2469 | FBgn0035205 | CG2469 | P( TRIP.HMS00619)attP2  |
| 43968  | CG2493 | FBgn0032864 | CG2493 | P( TRIP.GL01578)attP2   |
| 33649  | CG2577 | FBgn0030384 | CG2577 | P( TRIP.HMS00054)attP2  |
| 44520  | Cg25C  | FBgn0000299 | CG4145 | P( TRIP.HMC02910)attP2  |
| 58060  | CG2617 | FBgn0032877 | CG2617 | P( TRIP.HMJ21915)attP40 |
| 28753  | CG2641 | FBgn0037518 | CG2641 | P( TRIP.JF03181)attP2   |
| 56988  | CG2650 | FBgn0000092 | CG2650 | P( TRIP.HMC04428)attP40 |
| 35621  | CG2656 | FBgn0037478 | CG2656 | P( TRIP.GL00465)attP2   |
| 31223  | CG2658 | FBgn0024992 | CG2658 | P( TRIP.JF01781)attP2   |
| 28630  | CG2678 | FBgn0014931 | CG2678 | P( TRIP.JF03045)attP2   |
| 57213  | CG2680 | FBgn0024995 | CG2680 | P( TRIP.HMC04596)attP40 |
| 51750  | CG2685 | FBgn0024998 | CG2685 | P( TRIP.HMC03301)attP2  |
| 43969  | CG2694 | FBgn0024991 | CG2694 | P( TRIP.GL01579)attP2   |
| 57418  | CG2712 | FBgn0024975 | CG2712 | P( TRIP.HMC04724)attP40 |
| 44655  | CG2736 | FBgn0035090 | CG2736 | P( TRIP.HMC02427)attP2  |
| 29322  | CG2747 | FBgn0037541 | CG2747 | P( TRIP.JF02483)attP2   |
| 44662  | CG2747 | FBgn0037541 | CG2747 | P( TRIP.HMS02848)attP2  |
| 38301  | CG2774 | FBgn0031534 | CG2774 | P( TRIP.HMS01763)attP40 |
| 50710  | CG2781 | FBgn0037534 | CG2781 | P( TRIP.HMC03112)attP2  |
| 58341  | CG2790 | FBgn0027599 | CG2790 | P( TRIP.HMJ22472)attP40 |
| 33650  | CG2807 | FBgn0031266 | CG2807 | P( TRIP.HMS00055)attP2  |
| 41630  | CG2816 | FBgn0031564 | CG2816 | P( TRIP.GL01212)attP40  |
| 36057  | CG2846 | FBgn0014930 | CG2846 | P( TRIP.GL00187)attP2   |
| 55196  | CG2852 | FBgn0034753 | CG2852 | P( TRIP.HMC03892)attP40 |
| 50931  | CG2861 | FBgn0029728 | CG2861 | P( TRIP.HMJ21025)attP40 |
| 43165  | CG2865 | FBgn0023526 | CG2865 | P( TRIP.GL01507)attP2   |
| 29333  | CG2875 | FBgn0029672 | CG2875 | P( TRIP.JF02495)attP2   |
| 25851  | CG2893 | FBgn0040030 | CG2893 | P( TRIP.JF01872)attP2   |
| 52998  | CG2911 | FBgn0037350 | CG2911 | P( TRIP.HMJ21713)attP40 |
| 55962  | CG2918 | FBgn0023529 | CG2918 | P( TRIP.HMC04256)attP40 |
| 52965  | CG2921 | FBgn0034689 | CG2921 | P( TRIP.HMJ21649)attP40 |

|       |                         |                         |                         |                        |
|-------|-------------------------|-------------------------|-------------------------|------------------------|
| 51681 | CG2924                  | FBgn0023528             | CG2924                  | P{TRIP.GLC01774}attP40 |
| 34941 | CG2926                  | FBgn0037344             | CG2926                  | P{TRIP.HMS00216}attP2  |
| 54827 | CG2930                  | FBgn0028491             | CG2930                  | P{TRIP.HMJ21546}attP40 |
| 35667 | CG2941                  | FBgn0029686             | CG2941                  | P{TRIP.GLV21032}attP2  |
| 34581 | CG2943                  | FBgn0037530             | CG2943                  | P{TRIP.HMS01055}attP2  |
| 28319 | CG2962                  | FBgn0030186             | CG2962                  | P{TRIP.JF02951}attP2   |
| 57226 | CG2964                  | FBgn0031462             | CG2964                  | P{TRIP.HMC04610}attP40 |
| 43290 | CG2975                  | FBgn0031468             | CG2975                  | P{TRIP.HMS02662}attP40 |
| 44032 | CG2976                  | FBgn0031633             | CG2976                  | P{TRIP.HMS02748}attP40 |
| 33596 | CG2982                  | FBgn0029704             | CG2982                  | P{TRIP.HMS00680}attP2  |
| 42778 | CG2993                  | FBgn0037521             | CG2993                  | P{TRIP.GL01148}attP2   |
| 44517 | CG3008                  | FBgn0050008             | CG3008                  | P{TRIP.HMC02907}attP2  |
| 43293 | CG30010                 | FBgn0050010             | CG30010                 | P{TRIP.HMS02665}attP40 |
| 29368 | CG30020                 | FBgn0050020             | CG30020                 | P{TRIP.JF02532}attP2   |
| 58110 | CG30020                 | FBgn0050020             | CG30020                 | P{TRIP.HMJ22046}attP40 |
| 31222 | CG30022                 | FBgn0050022             | CG30022                 | P{TRIP.JF01780}attP2   |
| 57185 | CG30025                 | FBgn0050025             | CG30025                 | P{TRIP.HMC04567}attP40 |
| 28651 | CG30046                 | FBgn0050046             | CG30046                 | P{TRIP.JF03066}attP2   |
| 51823 | CG30054                 | FBgn0050054             | CG30054                 | P{TRIP.HMC03395}attP2  |
| 28607 | CG30059                 | FBgn00260475            | CG30059                 | P{TRIP.HM05095}attP2   |
| 28555 | CG30060                 | FBgn0050060             | CG30060                 | P{TRIP.HM05041}attP2   |
| 31736 | CG3008                  | FBgn0031643             | CG3008                  | P{TRIP.HM04045}attP2   |
| 57285 | CG30080                 | FBgn0050080             | CG30080                 | P{TRIP.HMC04682}attP40 |
| 28321 | CG30089                 | FBgn0050089             | CG30089                 | P{TRIP.JF02953}attP2   |
| 31129 | CG3009                  | FBgn0029720             | CG3009                  | P{TRIP.JF01602}attP2   |
| 52878 | CG30090                 | FBgn0050090             | CG30090                 | P{TRIP.HMC03616}attP40 |
| 36642 | CG30101                 | FBgn0050101             | CG30101                 | P{TRIP.GL00602}attP2   |
| 57739 | CG3011                  | FBgn0029823             | CG3011                  | P{TRIP.HMC04929}attP40 |
| 51884 | CG30120                 | FBgn0050120             | CG30120                 | P{TRIP.HMC03458}attP40 |
| 55209 | CG30122                 | FBgn0050122             | CG30122                 | P{TRIP.HMC03927}attP40 |
| 31162 | CG30158                 | FBgn0050158             | CG30158                 | P{TRIP.JF01655}attP2   |
| 41977 | CG30161                 | FBgn0050161             | CG30161                 | P{TRIP.HMS02375}attP2  |
| 29423 | CG30172                 | FBgn0050172             | CG30172                 | P{TRIP.JF03359}attP2   |
| 54841 | CG30187                 | FBgn0050187             | CG30187                 | P{TRIP.HMJ21560}attP40 |
| 44658 | CG30194                 | FBgn0050194             | CG30194                 | P{TRIP.HMC02440}attP2  |
| 56917 | CG30197                 | FBgn0050197             | CG30197                 | P{TRIP.HMC04355}attP40 |
| 28772 | CG30203                 | FBgn0050203             | CG30203                 | P{TRIP.JF03200}attP2   |
| 55144 | CG3021                  | FBgn0040337             | CG3021                  | P{TRIP.HMC03742}attP40 |
| 53006 | CG30217,CG43325,CG43326 | FBgn0263030,FBgn0263031 | CG30217,CG43325,CG43326 | P{TRIP.HMJ21723}attP40 |
| 42856 | CG30259                 | FBgn0050259             | CG30259                 | P{TRIP.HMS02548}attP40 |
| 50731 | CG30265                 | FBgn0050265             | CG30265                 | P{TRIP.HMS02967}attP2  |
| 58276 | CG30268                 | FBgn0050268             | CG30268                 | P{TRIP.HMJ22359}attP40 |
| 51493 | CG30272                 | FBgn0050272             | CG30272                 | P{TRIP.HMC03245}attP2  |
| 53271 | CG30280                 | FBgn0050280             | CG30280                 | P{TRIP.HMC03413}attP2  |
| 53376 | CG30283                 | FBgn0260477             | CG30283                 | P{TRIP.HMC03605}attP40 |
| 53376 | CG30283                 | FBgn0260477             | CG30283                 | P{TRIP.HMC03605}attP40 |
| 57560 | CG3032                  | FBgn0029928             | CG3032                  | P{TRIP.HMC04877}attP40 |
| 36751 | CG30324                 | FBgn0050324             | CG30324                 | P{TRIP.HMS03011}attP2  |
| 54809 | CG30338                 | FBgn0050338             | CG30338                 | P{TRIP.HMJ21503}attP40 |
| 28652 | CG30340                 | FBgn0050340             | CG30340                 | P{TRIP.JF03067}attP2   |
| 33994 | CG30345                 | FBgn0050345             | CG30345                 | P{TRIP.HMS00957}attP2  |
| 32494 | CG30356                 | FBgn0050356             | CG30356                 | P{TRIP.HMS00497}attP2  |
| 43179 | CG3036                  | FBgn0031645             | CG3036                  | P{TRIP.GL01522}attP2   |
| 43307 | CG30371                 | FBgn0050371             | CG30371                 | P{TRIP.HMS02691}attP2  |
| 31149 | CG30372                 | FBgn0050372             | CG30372                 | P{TRIP.JF01626}attP2   |
| 51386 | CG30377                 | FBgn0050377             | CG30377                 | P{TRIP.GLC01780}attP40 |
| 36679 | CG30379                 | FBgn0050379             | CG30379                 | P{TRIP.HMS01567}attP2  |
| 27557 | CG30382                 | FBgn0050382             | CG30382                 | P{TRIP.JF02711}attP2   |
| 43202 | CG30382                 | FBgn0050382             | CG30382                 | P{TRIP.GL01547}attP40  |
| 57201 | CG30395                 | FBgn0050395             | CG30395                 | P{TRIP.HMC04583}attP40 |
| 57286 | CG30403                 | FBgn0050403             | CG30403                 | P{TRIP.HMC04683}attP40 |
| 58318 | CG30411                 | FBgn0050411             | CG30411                 | P{TRIP.HMJ22443}attP40 |
| 27687 | CG30414                 | FBgn0050414             | CG30414                 | P{TRIP.JF02767}attP2   |
| 58169 | CG30416                 | FBgn0050416             | CG30416                 | P{TRIP.HMJ22146}attP40 |
| 58073 | CG30417                 | FBgn0050417             | CG30417                 | P{TRIP.HMJ21965}attP40 |
| 58271 | CG30427                 | FBgn0043792             | CG30427                 | P{TRIP.HMJ22354}attP40 |
| 51790 | CG30438                 | FBgn0050438             | CG30438                 | P{TRIP.HMC03346}attP2  |
| 31207 | CG30440                 | FBgn0050440             | CG30440                 | P{TRIP.JF01725}attP2   |

|       |         |             |         |                        |
|-------|---------|-------------|---------|------------------------|
| 34380 | CG30456 | FBgn0050456 | CG30456 | P{TRIP.HMS01370}attP2  |
| 52964 | CG30457 | FBgn0050457 | CG30457 | P{TRIP.HMJ21647}attP40 |
| 50617 | CG30463 | FBgn0050463 | CG30463 | P{TRIP.HMC02984}attP2  |
| 31372 | CG30466 | FBgn0050466 | CG30466 | P{TRIP.JF01339}attP2   |
| 56021 | CG30467 | FBgn0050467 | CG30467 | P{TRIP.HMC04317}attP40 |
| 50963 | CG30486 | FBgn0050486 | CG30486 | P{TRIP.HMJ21067}attP40 |
| 56918 | CG30488 | FBgn0050488 | CG30488 | P{TRIP.HMC04356}attP40 |
| 50630 | CG30491 | FBgn0050491 | CG30491 | P{TRIP.HMC02997}attP40 |
| 53336 | CG30493 | FBgn0050493 | CG30493 | P{TRIP.HMC03565}attP40 |
| 51927 | CG30495 | FBgn0050495 | CG30495 | P{TRIP.HMC02387}attP2  |
| 44078 | CG30496 | FBgn0050496 | CG30496 | P{TRIP.HMS02795}attP40 |
| 36594 | CG30497 | FBgn0050497 | CG30497 | P{TRIP.GL00554}attP2   |
| 42816 | CG30499 | FBgn0050499 | CG30499 | P{TRIP.GL01351}attP2   |
| 55145 | CG3088  | FBgn0036015 | CG3088  | P{TRIP.HMC03755}attP40 |
| 50945 | CG3091  | FBgn0029608 | CG3091  | P{TRIP.HMJ21043}attP40 |
| 42911 | CG31016 | FBgn0051016 | CG31016 | P{TRIP.HMS02604}attP40 |
| 34358 | CG31033 | FBgn0039705 | CG31033 | P{TRIP.HMS01347}attP2  |
| 58244 | CG31033 | FBgn0039705 | CG31033 | P{TRIP.HMJ22265}attP40 |
| 34367 | CG31048 | FBgn0051048 | CG31048 | P{TRIP.HMS01356}attP2  |
| 53691 | CG31050 | FBgn0051050 | CG31050 | P{TRIP.HMJ21674}attP40 |
| 43150 | CG31053 | FBgn0051053 | CG31053 | P{TRIP.GL01491}attP2   |
| 51494 | CG31064 | FBgn0051064 | CG31064 | P{TRIP.HMC03246}attP2  |
| 27087 | CG31065 | FBgn0051065 | CG31065 | P{TRIP.JF02433}attP2   |
| 50654 | CG31075 | FBgn0051075 | CG31075 | P{TRIP.HMC03055}attP2  |
| 55991 | CG31077 | FBgn0051077 | CG31077 | P{TRIP.HMC04287}attP40 |
| 58292 | CG31098 | FBgn0051098 | CG31098 | P{TRIP.HMJ22399}attP40 |
| 28359 | CG31103 | FBgn0051103 | CG31103 | P{TRIP.JF02995}attP2   |
| 28706 | CG31105 | FBgn0051105 | CG31105 | P{TRIP.JF03123}attP2   |
| 29582 | CG31106 | FBgn0051106 | CG31106 | P{TRIP.JF03261}attP2   |
| 56999 | CG31115 | FBgn0051115 | CG31115 | P{TRIP.HMC04441}attP40 |
| 36746 | CG31140 | FBgn0051140 | CG31140 | P{TRIP.HMS03006}attP2  |
| 44107 | CG31141 | FBgn0051141 | CG31141 | P{TRIP.HMC02828}attP40 |
| 39064 | CG31148 | FBgn0051148 | CG31148 | P{TRIP.HMS01984}attP2  |
| 38379 | CG31148 | FBgn0051148 | CG31148 | P{TRIP.HMS01848}attP40 |
| 32982 | CG31156 | FBgn0051156 | CG31156 | P{TRIP.HMS00782}attP2  |
| 53673 | CG3117  | FBgn0031471 | CG3117  | P{TRIP.HMC03606}attP40 |
| 53024 | CG31178 | FBgn0064912 | CG31178 | P{TRIP.HMJ21748}attP40 |
| 28604 | CG31183 | FBgn0051183 | CG31183 | P{TRIP.HM05092}attP2   |
| 42632 | CG31195 | FBgn0051195 | CG31195 | P{TRIP.HMS02468}attP40 |
| 55339 | CG31199 | FBgn0051199 | CG31199 | P{TRIP.HMC04026}attP40 |
| 55340 | CG31200 | FBgn0051200 | CG31200 | P{TRIP.HMC04027}attP40 |
| 56868 | CG31205 | FBgn0051205 | CG31205 | P{TRIP.HMC03686}attP2  |
| 38524 | CG3121  | FBgn0034957 | CG3121  | P{TRIP.HMS01721}attP40 |
| 25712 | CG3121  | FBgn0034957 | CG3121  | VDRC 25712             |
| 58190 | CG31213 | FBgn0051213 | CG31213 | P{TRIP.HMC04934}attP40 |
| 41953 | CG31221 | FBgn0051221 | CG31221 | P{TRIP.HM02350}attP2   |
| 33969 | CG31224 | FBgn0051224 | CG31224 | P{TRIP.HMS00926}attP2  |
| 28773 | CG31235 | FBgn0051235 | CG31235 | P{TRIP.JF03201}attP2   |
| 54011 | CG31244 | FBgn0051244 | CG31244 | P{TRIP.HMJ21435}attP40 |
| 34721 | CG31251 | FBgn0051251 | CG31251 | P{TRIP.HMS01200}attP2  |
| 53009 | CG31259 | FBgn0051259 | CG31259 | P{TRIP.HMJ21727}attP40 |
| 53970 | CG31262 | FBgn0051262 | CG31262 | P{TRIP.HMJ21355}attP40 |
| 28030 | CG31272 | FBgn0051272 | CG31272 | P{TRIP.JF02865}attP2   |
| 55992 | CG31286 | FBgn0051286 | CG31286 | P{TRIP.HMC04288}attP40 |
| 55993 | CG31296 | FBgn0051296 | CG31296 | P{TRIP.HMC04289}attP40 |
| 28774 | CG31324 | FBgn0051324 | CG31324 | P{TRIP.JF03202}attP2   |
| 55630 | CG31326 | FBgn0051326 | CG31326 | P{TRIP.HMC03777}attP40 |
| 41925 | CG31343 | FBgn0051343 | CG31343 | P{TRIP.HMS02322}attP2  |
| 55172 | CG31368 | FBgn0051368 | CG31368 | P{TRIP.HMC03852}attP40 |
| 42840 | CG31407 | FBgn0051407 | CG31407 | P{TRIP.HMS02532}attP40 |
| 38977 | CG31414 | FBgn0051414 | CG31414 | P{TRIP.HMS01893}attP40 |
| 53914 | CG31418 | FBgn0051418 | CG31418 | P{TRIP.HMJ21247}attP40 |
| 57575 | CG31419 | FBgn0051419 | CG31419 | P{TRIP.HMC04584}attP40 |
| 35248 | CG31431 | FBgn0051431 | CG31431 | P{TRIP.GL00135}attP2   |
| 42660 | CG31445 | FBgn0051445 | CG31445 | P{TRIP.HM02496}attP2   |
| 44071 | CG31446 | FBgn0051446 | CG31446 | P{TRIP.HMS02788}attP40 |
| 26312 | CG31460 | FBgn0051460 | CG31460 | P{TRIP.JF02085}attP2   |
| 51035 | CG31465 | FBgn0051465 | CG31465 | P{TRIP.HMJ21163}attP40 |

|       |                 |                         |                 |                        |
|-------|-----------------|-------------------------|-----------------|------------------------|
| 27550 | CG31469         | FBgn0051469             | CG31469         | P{TRIP.JF02702}attP2   |
| 53324 | CG3149          | FBgn0027564             | CG3149          | P{TRIP.HMC03553}attP40 |
| 57202 | CG31515         | FBgn0051515             | CG31515         | P{TRIP.HMC04585}attP40 |
| 38952 | CG31522         | FBgn0051522             | CG31522         | P{TRIP.HMS01866}attP2  |
| 51495 | CG31523         | FBgn0051523             | CG31523         | P{TRIP.HMC03248}attP2  |
| 50969 | CG31544         | FBgn0051544             | CG31544         | P{TRIP.HMJ21075}attP40 |
| 50962 | CG31606         | FBgn0051606             | CG31606         | P{TRIP.HMJ21066}attP40 |
| 57718 | CG31612         | FBgn0051612             | CG31612         | P{TRIP.HMC04907}attP40 |
| 55296 | CG31619         | FBgn0051619             | CG31619         | P{TRIP.HMC03983}attP2  |
| 35590 | CG31639         | FBgn0051639             | CG31639         | P{TRIP.GL00426}attP2   |
| 44629 | CG3164          | FBgn0025683             | CG3164          | P{TRIP.GLC01374}attP2  |
| 36894 | CG31642         | FBgn0051642             | CG31642         | P{TRIP.GL01083}attP2   |
| 56938 | CG31643         | FBgn0051643             | CG31643         | P{TRIP.HMC04377}attP2  |
| 28654 | CG31646         | FBgn0051646             | CG31646         | P{TRIP.JF03069}attP2   |
| 57203 | CG31659         | FBgn0051659             | CG31659         | P{TRIP.HMC04586}attP40 |
| 42758 | CG31673         | FBgn0051673             | CG31673         | P{TRIP.GL00713}attP2   |
| 35727 | CG31676         | FBgn0051676             | CG31676         | P{TRIP.HMS01469}attP2  |
| 56872 | CG31678         | FBgn0051678             | CG31678         | P{TRIP.HMC03728}attP2  |
| 29301 | CG3168          | FBgn0029896             | CG3168          | P{TRIP.JF02441}attP2   |
| 58145 | CG31680         | FBgn0051680             | CG31680         | P{TRIP.HMJ22095}attP40 |
| 55994 | CG31681         | FBgn0051681             | CG31681         | P{TRIP.HMC04290}attP40 |
| 57778 | CG31689         | FBgn0031449             | CG31689         | P{TRIP.HMC04972}attP40 |
| 44525 | CG31690         | FBgn0051690             | CG31690         | P{TRIP.HMC02919}attP2  |
| 38228 | CG31694         | FBgn0051694             | CG31694         | P{TRIP.HMS01672}attP40 |
| 55995 | CG31704         | FBgn0051704             | CG31704         | P{TRIP.HMC04291}attP40 |
| 31739 | CG31705         | FBgn0028490             | CG31705         | P{TRIP.HM04049}attP2   |
| 38227 | CG31708         | FBgn0051708             | CG31708         | P{TRIP.HMS01671}attP40 |
| 33350 | CG31714         | FBgn0032180             | CG31714         | P{TRIP.HMS00218}attP2  |
| 29729 | CG31714         | FBgn0032180             | CG31714         | VDRC 29729             |
| 55628 | CG31728         | FBgn0051728             | CG31728         | P{TRIP.HMC03773}attP40 |
| 51819 | CG31729         | FBgn0051729             | CG31729         | P{TRIP.HMC03390}attP2  |
| 42848 | CG31730         | FBgn0051730             | CG31730         | P{TRIP.HMS02540}attP40 |
| 52909 | CG31739         | FBgn0051739             | CG31739         | P{TRIP.HMC03649}attP40 |
| 21410 | CG31739         | FBgn0051739             | CG31739         | VDRC 21410             |
| 44518 | CG31741         | FBgn0051741             | CG31741         | P{TRIP.HMC02908}attP2  |
| 56030 | CG31751         | FBgn0086909             | CG31751         | P{TRIP.HMC04338}attP2  |
| 41642 | CG31759         | FBgn0051759             | CG31759         | P{TRIP.GL01224}attP2   |
| 41663 | CG3176          | FBgn0029524             | CG3176          | P{TRIP.GL01399}attP2   |
| 51838 | CG31760         | FBgn0051760             | CG31760         | P{TRIP.HMC03410}attP2  |
| 42897 | CG31776         | FBgn0051776             | CG31776         | P{TRIP.HMS02590}attP40 |
| 55337 | CG31780,CG18477 | FBgn0051780 FBgn0028864 | CG31780,CG18477 | P{TRIP.HMC04024}attP40 |
| 34942 | CG31792         | FBgn0051792             | CG31792         | P{TRIP.HMS00219}attP2  |
| 38319 | CG31793         | FBgn0051793             | CG31793         | P{TRIP.HMS01783}attP2  |
| 53893 | CG31802         | FBgn0051802             | CG31802         | P{TRIP.HMJ21211}attP40 |
| 53338 | CG31803         | FBgn0051803             | CG31803         | P{TRIP.HMC03567}attP40 |
| 29424 | CG31809         | FBgn0051809             | CG31809         | P{TRIP.JF03360}attP2   |
| 29424 | CG31810         | FBgn0051810             | CG31810         | P{TRIP.JF03360}attP2   |
| 55659 | CG31812         | FBgn0051812             | CG31812         | P{TRIP.HMC03813}attP40 |
| 31740 | CG31814         | FBgn0051814             | CG31814         | P{TRIP.HM04050}attP2   |
| 53372 | CG31827,CG18478 | FBgn0051827 FBgn0028517 | CG31827,CG18478 | P{TRIP.HMC03601}attP40 |
| 44020 | CG31849         | FBgn0051849             | CG31849         | P{TRIP.HMS02735}attP40 |
| 34903 | CG31855         | FBgn0051855             | CG31855         | P{TRIP.HMS01248}attP2  |
| 38312 | CG31860         | FBgn0051860             | CG31860         | P{TRIP.HMS01776}attP40 |
| 57451 | CG31875         | FBgn0051875             | CG31875         | P{TRIP.HMC04759}attP40 |
| 36769 | CG31886         | FBgn0032079             | CG31886         | P{TRIP.HMS03030}attP2  |
| 34677 | CG31904         | FBgn0260479             | CG31904         | P{TRIP.HMS01155}attP2  |
| 55161 | CG31950         | FBgn0051950             | CG31950         | P{TRIP.HMC03836}attP40 |
| 53674 | CG31954         | FBgn0051954             | CG31954         | P{TRIP.HMC03607}attP40 |
| 31967 | CG31955         | FBgn0051955             | CG31955         | P{TRIP.JF03334}attP2   |
| 31569 | CG31958         | FBgn0051958             | CG31958         | P{TRIP.JF01142}attP2   |
| 57517 | CG31997         | FBgn0051997             | CG31997         | P{TRIP.HMC04832}attP40 |
| 41828 | CG31998         | FBgn0051998             | CG31998         | P{TRIP.GL01256}attP2   |
| 31697 | CG31999         | FBgn0051999             | CG31999         | P{TRIP.JF01163}attP2   |
| 30499 | CG32000         | FBgn0052000             | CG32000         | P{TRIP.HM05242}attP2   |
| 35633 | CG32016         | FBgn0052016             | CG32016         | P{TRIP.GL00480}attP2   |
| 55997 | CG32024         | FBgn0052024             | CG32024         | P{TRIP.HMC04293}attP40 |
| 53953 | CG32026         | FBgn0052026             | CG32026         | P{TRIP.HMJ21319}attP40 |
| 54818 | CG32036         | FBgn0052036             | CG32036         | P{TRIP.HMJ21537}attP40 |

|       |                 |                         |                 |                        |
|-------|-----------------|-------------------------|-----------------|------------------------|
| 36763 | CG32052         | FBgn0044328             | CG32052         | P{TRIP.HMS03024}attP2  |
| 50692 | CG32055         | FBgn0052055             | CG32055         | P{TRIP.HMC03093}attP2  |
| 56008 | CG32068         | FBgn0052068             | CG32068         | P{TRIP.HMC04304}attP40 |
| 44526 | CG32082         | FBgn0052082             | CG32082         | P{TRIP.HMC02920}attP2  |
| 31488 | CG32085         | FBgn0052085             | CG32085         | P{TRIP.JF01333}attP2   |
| 52969 | CG32088         | FBgn0052088             | CG32088         | P{TRIP.HMJ21654}attP40 |
| 42863 | CG3209          | FBgn0034971             | CG3209          | P{TRIP.HMS02556}attP40 |
| 57783 | CG32091         | FBgn0052091             | CG32091         | P{TRIP.HMC04977}attP40 |
| 52975 | CG32102         | FBgn0052102             | CG32102         | P{TRIP.HMJ21661}attP40 |
| 31905 | CG32105         | FBgn0052105             | CG32105         | P{TRIP.JF02194}attP2   |
| 32970 | CG32109         | FBgn0052109             | CG32109         | P{TRIP.HMS00767}attP2  |
| 38320 | CG32113         | FBgn0052113             | CG32113         | P{TRIP.HMS01784}attP2  |
| 32447 | CG32138         | FBgn0052138             | CG32138         | P{TRIP.HMS00445}attP2  |
| 36695 | CG3214          | FBgn0031436             | CG3214          | P{TRIP.HMS01584}attP2  |
| 58349 | CG32148         | FBgn0047338             | CG32148         | P{TRIP.HMJ22480}attP40 |
| 31877 | CG3216          | FBgn0034568             | CG3216          | P{TRIP.HM05270}attP2   |
| 28692 | CG32165         | FBgn0042178             | CG32165         | P{TRIP.JF03108}attP2   |
| 42007 | CG32174         | FBgn0052174             | CG32174         | P{TRIP.HMS02408}attP40 |
| 55923 | CG32176         | FBgn0052176             | CG32176         | P{TRIP.HMC04210}attP40 |
| 58296 | CG32195,CG7341  | FBgn0036777,FBgn0052195 | CG32195,CG7341  | P{TRIP.HMJ22403}attP40 |
| 28308 | CG32204         | FBgn0052204             | CG32204         | P{TRIP.JF02939}attP2   |
| 33645 | CG32206         | FBgn0052206             | CG32206         | P{TRIP.HMS00046}attP2  |
| 31369 | CG32221         | FBgn0052221             | CG32221         | P{TRIP.JF01334}attP2   |
| 34370 | CG32226         | FBgn0052226             | CG32226         | P{TRIP.HMS01359}attP2  |
| 43305 | CG32236         | FBgn0046793             | CG32236         | P{TRIP.HMS02685}attP40 |
| 54016 | CG32238         | FBgn0052238             | CG32238         | P{TRIP.HMJ21441}attP40 |
| 36082 | CG32243         | FBgn0052243             | CG32243         | P{TRIP.GL00501}attP2   |
| 55365 | CG3225          | FBgn0031631             | CG3225          | P{TRIP.HMC04053}attP40 |
| 32974 | CG32251         | FBgn0052251             | CG32251         | P{TRIP.HMS00772}attP2  |
| 32875 | CG3226          | FBgn0029882             | CG3226          | P{TRIP.HMS00662}attP2  |
| 28340 | CG32264         | FBgn0052264             | CG32264         | P{TRIP.JF02975}attP2   |
| 53361 | CG32270,CG32269 | FBgn0052270,FBgn0052269 | CG32270,CG32269 | P{TRIP.HMC03590}attP40 |
| 55857 | CG32277         | FBgn0052277             | CG32277         | P{TRIP.HMC03895}attP40 |
| 51764 | CG32281         | FBgn0052281             | CG32281         | P{TRIP.HMC03318}attP2  |
| 28956 | CG32295         | FBgn0260480             | CG32295         | P{TRIP.HM05167}attP2   |
| 55999 | CG32313         | FBgn0052313             | CG32313         | P{TRIP.HMC04295}attP40 |
| 50693 | CG32354         | FBgn0052354             | CG32354         | P{TRIP.HMC03095}attP2  |
| 36752 | CG32364         | FBgn0052364             | CG32364         | P{TRIP.HMS03012}attP2  |
| 52870 | CG32374         | FBgn0052374             | CG32374         | P{TRIP.HMC03608}attP40 |
| 51040 | CG32376         | FBgn0052376             | CG32376         | P{TRIP.HMJ21171}attP40 |
| 34558 | CG3239          | FBgn0029769             | CG3239          | P{TRIP.HMS01030}attP2  |
| 43964 | CG32425         | FBgn0052425             | CG32425         | P{TRIP.GL01479}attP2   |
| 29621 | CG32432         | FBgn0052432             | CG32432         | P{TRIP.JF03300}attP2   |
| 53929 | CG32444         | FBgn0043783             | CG32444         | P{TRIP.HMJ21275}attP40 |
| 50948 | CG32452         | FBgn0052452             | CG32452         | P{TRIP.HMJ21047}attP40 |
| 43972 | CG32473         | FBgn0052473             | CG32473         | P{TRIP.GL01582}attP2   |
| 54013 | CG32473         | FBgn0052473             | CG32473         | P{TRIP.HMJ21437}attP40 |
| 36897 | CG32479         | FBgn0052479             | CG32479         | P{TRIP.GL01087}attP2   |
| 35465 | CG32486         | FBgn0052486             | CG32486         | P{TRIP.GL00391}attP2   |
| 52949 | CG32488         | FBgn0052488             | CG32488         | P{TRIP.HMJ21618}attP40 |
| 53910 | CG32495,CG6835  | FBgn0030882,FBgn0052495 | CG32495,CG6835  | P{TRIP.HMJ21241}attP40 |
| 28776 | CG32506         | FBgn0052506             | CG32506         | P{TRIP.JF03204}attP2   |
| 57437 | CG32512         | FBgn0052512             | CG32512         | P{TRIP.HMC04744}attP40 |
| 55607 | CG32523         | FBgn0052523             | CG32523         | P{TRIP.HMC03745}attP40 |
| 33351 | CG3253          | FBgn0041706             | CG3253          | P{TRIP.HMS00220}attP2  |
| 26750 | CG32532         | FBgn0052532             | CG32532         | P{TRIP.JF02313}attP2   |
| 55255 | CG32533         | FBgn0052533             | CG32533         | P{TRIP.HMC03942}attP40 |
| 28621 | CG32547         | FBgn0052547             | CG32547         | P{TRIP.JF03036}attP2   |
| 44467 | CG32549         | FBgn0052549             | CG32549         | P{TRIP.GLC01625}attP2  |
| 58342 | CG32564         | FBgn0052564             | CG32564         | P{TRIP.HMJ22473}attP40 |
| 38910 | CG32568         | FBgn0052568             | CG32568         | P{TRIP.GL00682}attP2   |
| 28611 | CG3257          | FBgn0034978             | CG3257          | P{TRIP.JF03026}attP2   |
| 54854 | CG32573,CG42512 | FBgn0052573,FBgn0260238 | CG32573,CG42512 | P{TRIP.HMJ21491}attP40 |
| 57784 | CG32579         | FBgn0052579             | CG32579         | P{TRIP.HMC04978}attP40 |
| 50935 | CG32588         | FBgn0052588             | CG32588         | P{TRIP.HMJ21030}attP40 |
| 43153 | CG32599         | FBgn0260482             | CG32599         | P{TRIP.GL01494}attP2   |
| 46660 | CG32599         | FBgn0260482             | CG32599         | VDR.C.46660            |
| 51873 | CG3262          | FBgn0032986             | CG3262          | P{TRIP.HMC03447}attP40 |

|       |         |             |         |                        |
|-------|---------|-------------|---------|------------------------|
| 38953 | CG32626 | FBgn0052626 | CG32626 | P{TRIP.HMS01867}attP2  |
| 44036 | CG32628 | FBgn0052628 | CG32628 | P{TRIP.HMS02752}attP40 |
| 33549 | CG32628 | FBgn0052628 | CG32628 | P{TRIP.HMS00221}attP2  |
| 54008 | CG32633 | FBgn0052633 | CG32633 | P{TRIP.HMJ21431}attP40 |
| 43229 | CG32649 | FBgn0052649 | CG32649 | P{TRIP.GL01574}attP2   |
| 52912 | CG3267  | FBgn0042083 | CG3267  | P{TRIP.HMC03652}attP40 |
| 44079 | CG32683 | FBgn0052683 | CG32683 | P{TRIP.HMS02796}attP40 |
| 41975 | CG32694 | FBgn0052694 | CG32694 | P{TRIP.HMS02373}attP2  |
| 53687 | CG32695 | FBgn0052695 | CG32695 | P{TRIP.HMJ21616}attP40 |
| 56000 | CG32698 | FBgn0052698 | CG32698 | P{TRIP.HMC04296}attP40 |
| 31153 | CG3270  | FBgn0033093 | CG3270  | P{TRIP.JF01630}attP2   |
| 57719 | CG32700 | FBgn0052700 | CG32700 | P{TRIP.HMC04908}attP40 |
| 28702 | CG32702 | FBgn0052702 | CG32702 | P{TRIP.JF03118}attP2   |
| 36110 | CG32703 | FBgn0052703 | CG32703 | P{TRIP.HMS00222}attP2  |
| 42853 | CG32736 | FBgn0052736 | CG32736 | P{TRIP.HMS02545}attP40 |
| 50653 | CG32751 | FBgn0052751 | CG32751 | P{TRIP.HMC03054}attP2  |
| 41657 | CG32756 | FBgn0052756 | CG32756 | P{TRIP.GL01239}attP2   |
| 38225 | CG32758 | FBgn0052758 | CG32758 | P{TRIP.HMC01669}attP40 |
| 51768 | CG32772 | FBgn0052772 | CG32772 | P{TRIP.HMC03323}attP40 |
| 38965 | CG32791 | FBgn0052791 | CG32791 | P{TRIP.HMS01879}attP40 |
| 25814 | CG32792 | FBgn0052792 | CG32792 | P{TRIP.JF01832}attP2   |
| 44270 | CG32808 | FBgn0052808 | CG32808 | P{TRIP.HMS02812}attP2  |
| 28822 | CG32809 | FBgn0023531 | CG32809 | P{TRIP.JF03005}attP2   |
| 44555 | CG3281  | FBgn0260741 | CG3281  | P{TRIP.HMS02851}attP40 |
| 38383 | CG32814 | FBgn0052814 | CG32814 | P{TRIP.HMS01852}attP40 |
| 57518 | CG32833 | FBgn0052833 | CG32833 | P{TRIP.HMC04833}attP40 |
| 31554 | CG32850 | FBgn0052850 | CG32850 | P{TRIP.JF01121}attP2   |
| 57179 | CG3290  | FBgn0034711 | CG3290  | P{TRIP.HMC04561}attP40 |
| 57178 | CG3292  | FBgn0034710 | CG3292  | P{TRIP.HMC04560}attP40 |
| 27296 | CG3294  | FBgn0031628 | CG3294  | P{TRIP.JF02606}attP2   |
| 27290 | CG32944 | FBgn0052944 | CG32944 | P{TRIP.JF02591}attP2   |
| 31927 | CG33017 | FBgn0053017 | CG33017 | P{TRIP.JF02217}attP2   |
| 55610 | CG33052 | FBgn0053052 | CG33052 | P{TRIP.HMC03748}attP40 |
| 55699 | CG33057 | FBgn0053057 | CG33057 | P{TRIP.HMC03914}attP40 |
| 42554 | CG33080 | FBgn0053080 | CG33080 | P{TRIP.HMJ02127}attP40 |
| 36688 | CG33090 | FBgn0028916 | CG33090 | P{TRIP.HMS01576}attP2  |
| 33352 | CG33095 | FBgn0053095 | CG33095 | P{TRIP.HMS00223}attP2  |
| 44559 | CG33099 | FBgn0053099 | CG33099 | P{TRIP.HMS02855}attP40 |
| 44519 | CG33110 | FBgn0053110 | CG33110 | P{TRIP.HMC02909}attP2  |
| 43247 | CG33116 | FBgn0053116 | CG33116 | P{TRIP.GLC01435}attP2  |
| 42934 | CG33120 | FBgn0053120 | CG33120 | P{TRIP.HMC02627}attP40 |
| 34483 | CG33123 | FBgn0053123 | CG33123 | P{TRIP.HMS01335}attP2  |
| 33751 | CG33129 | FBgn0053129 | CG33129 | P{TRIP.HMS01091}attP2  |
| 28823 | CG33143 | FBgn0053143 | CG33143 | P{TRIP.JF02930}attP2   |
| 26306 | CG33159 | FBgn0053159 | CG33159 | P{TRIP.JF02076}attP2   |
| 55341 | CG33160 | FBgn0053160 | CG33160 | P{TRIP.HMC04028}attP40 |
| 39056 | CG33181 | FBgn0053181 | CG33181 | P{TRIP.HMS01976}attP40 |
| 44088 | CG33203 | FBgn0053203 | CG33203 | P{TRIP.HMS02805}attP2  |
| 31560 | CG33205 | FBgn0053205 | CG33205 | P{TRIP.JF01132}attP2   |
| 29458 | CG33213 | FBgn0053213 | CG33213 | P{TRIP.JF03394}attP2   |
| 34921 | CG33214 | FBgn0053214 | CG33214 | P{TRIP.HMS01270}attP2  |
| 26973 | CG33214 | FBgn0053214 | CG33214 | VDR C.26973            |
| 43315 | CG33217 | FBgn0053217 | CG33217 | P{TRIP.HMS02699}attP40 |
| 55372 | CG33228 | FBgn0261373 | CG33228 | P{TRIP.HMC04060}attP40 |
| 41696 | CG33232 | FBgn0035347 | CG33232 | P{TRIP.HMS02261}attP2  |
| 36106 | CG33253 | FBgn0030992 | CG33253 | P{TRIP.HMS00158}attP2  |
| 35685 | CG33253 | FBgn0030992 | CG33253 | VDR C.35685            |
| 56966 | CG33258 | FBgn0053258 | CG33258 | P{TRIP.HMC04407}attP40 |
| 56926 | CG33259 | FBgn0036495 | CG33259 | P{TRIP.HMC04365}attP40 |
| 38266 | CG3326  | FBgn0031519 | CG3326  | P{TRIP.HMS01711}attP40 |
| 55954 | CG33263 | FBgn0053263 | CG33263 | P{TRIP.HMC04243}attP40 |
| 50929 | CG33267 | FBgn0053267 | CG33267 | P{TRIP.HMJ21023}attP40 |
| 31221 | CG33275 | FBgn0035802 | CG33275 | P{TRIP.JF01776}attP2   |
| 55955 | CG33276 | FBgn0053276 | CG33276 | P{TRIP.HMC04244}attP40 |
| 48364 | CG33276 | FBgn0053276 | CG33276 | VDR C.48364            |
| 55211 | CG3328  | FBgn0034985 | CG3328  | P{TRIP.GLC01379}attP2  |
| 51029 | CG33286 | FBgn0053286 | CG33286 | P{TRIP.HMJ21156}attP40 |
| 25816 | CG33289 | FBgn0053289 | CG33289 | P{TRIP.JF01834}attP2   |

|       |                 |                         |                 |                        |
|-------|-----------------|-------------------------|-----------------|------------------------|
| 50916 | CG33290         | FBgn0053290             | CG33290         | P(TRIP.HMJ21005)attP40 |
| 51841 | CG33298         | FBgn0032120             | CG33298         | P(TRIP.HMC03414)attP2  |
| 31742 | CG3332          | FBgn0031514             | CG3332          | P(TRIP.HM04052)attP2   |
| 58339 | CG33340         | FBgn0053340             | CG33340         | P(TRIP.HMJ22469)attP40 |
| 38267 | CG3338          | FBgn0031598             | CG3338          | P(TRIP.HMS01712)attP40 |
| 21678 | CG3338          | FBgn0031598             | CG3338          | VDRC.21678             |
| 55605 | CG3339          | FBgn0039510             | CG3339          | P(TRIP.HMC03741)attP2  |
| 58141 | CG33458         | FBgn0053458             | CG33458         | P(TRIP.HMJ22090)attP40 |
| 52900 | CG33460         | FBgn0053460             | CG33460         | P(TRIP.HMC03639)attP40 |
| 38323 | CG33465         | FBgn0053465             | CG33465         | P(TRIP.HMS01787)attP2  |
| 55905 | CG33467         | FBgn0053467             | CG33467         | P(TRIP.HMC04189)attP2  |
| 28540 | CG33470         | FBgn0053470             | CG33470         | P(TRIP.HM05026)attP2   |
| 55985 | CG3348          | FBgn0040609             | CG3348          | P(TRIP.HMC04281)attP40 |
| 41880 | CG33487         | FBgn0053487             | CG33487         | P(TRIP.HMS02294)attP2  |
| 41880 | CG33491         | FBgn0053491             | CG33491         | P(TRIP.HMS02294)attP2  |
| 41880 | CG33496         | FBgn0053496             | CG33496         | P(TRIP.HMS02294)attP2  |
| 41880 | CG33498         | FBgn0053498             | CG33498         | P(TRIP.HMS02294)attP2  |
| 52907 | CG33502         | FBgn0053502             | CG33502         | P(TRIP.HMC03647)attP40 |
| 44069 | CG33510         | FBgn0053510             | CG33510         | P(TRIP.HMS02786)attP40 |
| 25838 | CG33523         | FBgn0053523             | CG33523         | P(TRIP.JF01856)attP2   |
| 28609 | CG3353          | FBgn0038869             | CG3353          | P(TRIP.JF03024)attP2   |
| 52897 | CG3355          | FBgn0031619             | CG3355          | P(TRIP.HMC03636)attP40 |
| 13037 | CG3355          | FBgn0031619             | CG3355          | VDRC.13037             |
| 57453 | CG33557         | FBgn0053557             | CG33557         | P(TRIP.HMC04761)attP40 |
| 31376 | CG3356          | FBgn0034989             | CG3356          | P(TRIP.JF01343)attP2   |
| 53015 | CG33630         | FBgn0053630             | CG33630         | P(TRIP.HMJ21738)attP40 |
| 28614 | CG33639         | FBgn0053639             | CG33639         | P(TRIP.JF03029)attP2   |
| 42823 | CG33643         | FBgn0053643             | CG33643         | P(TRIP.HMS02505)attP40 |
| 43286 | CG33643         | FBgn0053643             | CG33643         | P(TRIP.HMS02658)attP40 |
| 51158 | CG33649         | FBgn0064115             | CG33649         | P(TRIP.HMC02394)attP2  |
| 28051 | CG33673         | FBgn0053673             | CG33673         | P(TRIP.JF02886)attP2   |
| 42640 | CG33695         | FBgn0052831             | CG33695         | P(TRIP.HMS02476)attP40 |
| 28380 | CG33696         | FBgn0053696             | CG33696         | P(TRIP.JF03017)attP2   |
| 54054 | CG33703         | FBgn0053703             | CG33703         | P(TRIP.HMS03715)attP40 |
| 56374 | CG33713,CG33714 | FBgn0064116 FBgn0064117 | CG33713,CG33714 | P(TRIP.HMC04062)attP40 |
| 36760 | CG3376          | FBgn0034997             | CG3376          | P(TRIP.HMS03021)attP2  |
| 34101 | CG33791         | FBgn0035240             | CG33791         | P(TRIP.HMS01006)attP2  |
| 31087 | CG33796         | FBgn0053796             | CG33796         | P(TRIP.JF01539)attP2   |
| 58090 | CG33922         | FBgn0053922             | CG33922         | P(TRIP.HMJ21983)attP40 |
| 34891 | CG33934         | FBgn0064119             | CG33934         | P(TRIP.HMS01236)attP2  |
| 50570 | CG3394          | FBgn0034999             | CG3394          | P(TRIP.GLC01692)attP2  |
| 30507 | CG33958         | FBgn0053958             | CG33958         | P(TRIP.HM05251)attP2   |
| 28932 | CG33960         | FBgn0053960             | CG33960         | P(TRIP.HM05143)attP2   |
| 25818 | CG3397          | FBgn0037975             | CG3397          | P(TRIP.JF01836)attP2   |
| 51782 | CG33981         | FBgn0250851             | CG33981         | P(TRIP.HMC03337)attP40 |
| 36754 | CG33988         | FBgn0053988             | CG33988         | P(TRIP.HMS03014)attP2  |
| 57204 | CG34002         | FBgn0054002             | CG34002         | P(TRIP.HMC04587)attP40 |
| 54031 | CG34015         | FBgn0054015             | CG34015         | P(TRIP.HMJ21474)attP40 |
| 57454 | CG34031         | FBgn0054031             | CG34031         | P(TRIP.HMC04762)attP40 |
| 54055 | CG34033         | FBgn0054033             | CG34033         | P(TRIP.HMS03716)attP2  |
| 55956 | CG34034         | FBgn0054034             | CG34034         | P(TRIP.HMC04245)attP40 |
| 41951 | CG34054         | FBgn0054054             | CG34054         | P(TRIP.HMS02348)attP40 |
| 57762 | CG3407          | FBgn0031573             | CG3407          | P(TRIP.HMC04955)attP40 |
| 33738 | CG34104         | FBgn0083940             | CG34104         | P(TRIP.HMS00622)attP2  |
| 58236 | CG34107         | FBgn0083943             | CG34107         | P(TRIP.HMJ22256)attP40 |
| 51398 | CG34116         | FBgn0083952             | CG34116         | P(TRIP.GLC01745)attP2  |
| 53241 | CG34117         | FBgn0083953             | CG34117         | P(TRIP.GLC01378)attP2  |
| 38356 | CG34120         | FBgn0083956             | CG34120         | P(TRIP.HMS01824)attP40 |
| 38264 | CG34127         | FBgn0083963             | CG34127         | P(TRIP.HMS01709)attP40 |
| 55959 | CG34129         | FBgn0083965             | CG34129         | P(TRIP.HMC04253)attP40 |
| 57205 | CG34130         | FBgn0083966             | CG34130         | P(TRIP.HMC04588)attP40 |
| 50936 | CG34136         | FBgn0083972             | CG34136         | P(TRIP.HMJ21031)attP40 |
| 38265 | CG34139         | FBgn0083975             | CG34139         | P(TRIP.HMS01710)attP40 |
| 58119 | CG34139         | FBgn0083975             | CG34139         | P(TRIP.HMJ22056)attP40 |
| 38951 | CG34140         | FBgn0083976             | CG34140         | P(TRIP.HMS01865)attP2  |
| 50551 | CG34149         | FBgn0083985             | CG34149         | P(TRIP.GLC01671)attP2  |
| 41955 | CG34174         | FBgn0085203             | CG34174         | P(TRIP.HMS02352)attP2  |
| 57206 | CG34177         | FBgn0085206             | CG34177         | P(TRIP.HMC04589)attP40 |



|       |         |             |         |                        |
|-------|---------|-------------|---------|------------------------|
| 38360 | CG3419  | FBgn0035002 | CG3419  | P(TRIP.HMS01828)attP2  |
| 39054 | CG34191 | FBgn0085220 | CG34191 | P(TRIP.HMS01974)attP40 |
| 44463 | CG34200 | FBgn0085229 | CG34200 | P(TRIP.GLC01618)attP2  |
| 41901 | CG34201 | FBgn0085230 | CG34201 | P(TRIP.GL01333)attP2   |
| 42814 | CG34202 | FBgn0085231 | CG34202 | P(TRIP.GL01348)attP2   |
| 33893 | CG34207 | FBgn0085236 | CG34207 | P(TRIP.HMS00831)attP2  |
| 55215 | CG34214 | FBgn0085243 | CG34214 | P(TRIP.GLC01832)attP2  |
| 56985 | CG34227 | FBgn0085256 | CG34227 | P(TRIP.HMC04425)attP40 |
| 35019 | CG34229 | FBgn0259832 | CG34229 | P(TRIP.HMS01432)attP2  |
| 58086 | CG34244 | FBgn0085273 | CG34244 | P(TRIP.HMJ21978)attP40 |
| 58097 | CG34249 | FBgn0085278 | CG34249 | P(TRIP.HMJ22012)attP40 |
| 44573 | CG34290 | FBgn0085319 | CG34290 | P(TRIP.HMS02869)attP2  |
| 42810 | CG3430  | FBgn0031875 | CG3430  | P(TRIP.GL01184)attP2   |
| 52953 | CG34307 | FBgn0085336 | CG34307 | P(TRIP.HMJ21622)attP40 |
| 25876 | CG34315 | FBgn0085344 | CG34315 | P(TRIP.JF01915)attP2   |
| 58071 | CG34320 | FBgn0085349 | CG34320 | P(TRIP.HMJ21963)attP40 |
| 57723 | CG34340 | FBgn0085369 | CG34340 | P(TRIP.HMC04912)attP40 |
| 40941 | CG34345 | FBgn0085374 | CG34345 | P(TRIP.HMS02189)attP2  |
| 58291 | CG34353 | FBgn0085382 | CG34353 | P(TRIP.HMJ22398)attP40 |
| 33674 | CG34354 | FBgn0085383 | CG34354 | P(TRIP.HMS00538)attP2  |
| 50912 | CG34356 | FBgn0085385 | CG34356 | P(TRIP.HMJ03136)attP40 |
| 28524 | CG34357 | FBgn0085386 | CG34357 | P(TRIP.HM05010)attP2   |
| 55207 | CG3436  | FBgn0031229 | CG3436  | P(TRIP.HMC03922)attP40 |
| 57455 | CG34367 | FBgn0085396 | CG34367 | P(TRIP.HMC04763)attP40 |
| 25892 | CG34369 | FBgn0085398 | CG34369 | P(TRIP.JF01933)attP2   |
| 28729 | CG34370 | FBgn0085399 | CG34370 | P(TRIP.JF03156)attP2   |
| 29371 | CG34376 | FBgn0085405 | CG34376 | P(TRIP.JF02535)attP2   |
| 51439 | CG34376 | FBgn0085405 | CG34376 | P(TRIP.HMC03153)attP2  |
| 44089 | CG34380 | FBgn0085409 | CG34380 | P(TRIP.HMS02806)attP2  |
| 51917 | CG34383 | FBgn0085412 | CG34383 | P(TRIP.HMS03376)attP2  |
| 42779 | CG34394 | FBgn0085423 | CG34394 | P(TRIP.GL01149)attP2   |
| 26011 | CG34396 | FBgn0085425 | CG34396 | P(TRIP.JF02036)attP2   |
| 50530 | CG34401 | FBgn0085430 | CG34401 | P(TRIP.GLC01648)attP2  |
| 26016 | CG34402 | FBgn0085431 | CG34402 | P(TRIP.JF02041)attP2   |
| 28655 | CG34411 | FBgn0085440 | CG34411 | P(TRIP.JF03070)attP2   |
| 58278 | CG34417 | FBgn0085446 | CG34417 | P(TRIP.HMJ22361)attP40 |
| 44021 | CG34420 | FBgn0085449 | CG34420 | P(TRIP.HMS02736)attP40 |
| 31754 | CG34422 | FBgn0085451 | CG34422 | P(TRIP.HM04064)attP2   |
| 50980 | CG34426 | FBgn0085455 | CG34426 | P(TRIP.HMJ21087)attP40 |
| 51037 | CG34436 | FBgn0085465 | CG34436 | P(TRIP.HMJ21168)attP40 |
| 58251 | CG34442 | FBgn0085471 | CG34442 | P(TRIP.HMJ22313)attP40 |
| 56002 | CG34447 | FBgn0085476 | CG34447 | P(TRIP.HMC04298)attP40 |
| 56003 | CG34448 | FBgn0085477 | CG34448 | P(TRIP.HMC04299)attP40 |
| 57788 | CG34455 | FBgn0085484 | CG34455 | P(TRIP.HMC04982)attP40 |
| 43279 | CG3446  | FBgn0029868 | CG3446  | P(TRIP.HMC02678)attP2  |
| 42696 | CG3446  | FBgn0029868 | CG3446  | VDR.C.42696            |
| 57207 | CG34460 | FBgn0085489 | CG34460 | P(TRIP.HMC04590)attP40 |
| 53885 | CG3457  | FBgn0024984 | CG3457  | P(TRIP.HMJ21203)attP40 |
| 58148 | CG3476  | FBgn0031881 | CG3476  | P(TRIP.HMJ22099)attP40 |
| 57556 | CG3491  | FBgn0028887 | CG3491  | P(TRIP.HMC04873)attP40 |
| 27056 | CG3494  | FBgn0035008 | CG3494  | P(TRIP.JF02382)attP2   |
| 51752 | CG3499  | FBgn0034792 | CG3499  | P(TRIP.HMC03303)attP2  |
| 44090 | CG3502  | FBgn0046253 | CG3502  | P(TRIP.HMS02807)attP2  |
| 55342 | CG3505  | FBgn0038250 | CG3505  | P(TRIP.HMC04029)attP40 |
| 32898 | CG3508  | FBgn0038251 | CG3508  | P(TRIP.HMS00687)attP2  |
| 34548 | CG3509  | FBgn0038252 | CG3509  | P(TRIP.HMS01020)attP2  |
| 50597 | CG3511  | FBgn0035027 | CG3511  | P(TRIP.GLC01719)attP2  |
| 41918 | CG3513  | FBgn0031559 | CG3513  | P(TRIP.HMS02315)attP2  |
| 35775 | CG3523  | FBgn0027571 | CG3523  | P(TRIP.HMS01524)attP2  |
| 50966 | CG3529  | FBgn0035995 | CG3529  | P(TRIP.HMJ21071)attP40 |
| 38340 | CG3530  | FBgn0028497 | CG3530  | P(TRIP.HMS01807)attP2  |
| 35245 | CG3534  | FBgn0038463 | CG3534  | P(TRIP.GL00132)attP2   |
| 33711 | CG3542  | FBgn0031492 | CG3542  | P(TRIP.HMS00589)attP2  |
| 57576 | CG3544  | FBgn0031279 | CG3544  | P(TRIP.HMC04609)attP40 |
| 54829 | CG3557  | FBgn0031423 | CG3557  | P(TRIP.HMJ21548)attP40 |
| 44636 | CG3558  | FBgn0025681 | CG3558  | P(TRIP.GLC01397)attP2  |
| 50591 | CG3566  | FBgn0029854 | CG3566  | P(TRIP.GLC01713)attP2  |
| 58253 | CG3568  | FBgn0029710 | CG3568  | P(TRIP.HMJ22316)attP40 |

|        |         |             |         |                        |
|--------|---------|-------------|---------|------------------------|
| 52944  | CG3570  | FBgn0035035 | CG3570  | P{TRIP.HMJ21611}attP40 |
| 34347  | CG3590  | FBgn0038467 | CG3590  | P{TRIP.HMS01336}attP2  |
| 42817  | CG3604  | FBgn0031562 | CG3604  | P{TRIP.GL01352}attP40  |
| 42829  | CG3604  | FBgn0031562 | CG3604  | P{TRIP.HMS02513}attP2  |
| 33651  | CG3605  | FBgn0031493 | CG3605  | P{TRIP.HMS00056}attP2  |
| 42841  | CG3608  | FBgn0035039 | CG3608  | P{TRIP.HMS02533}attP40 |
| 28303  | CG3618  | FBgn0037028 | CG3618  | P{TRIP.JF02934}attP2   |
| 36728  | CG3624  | FBgn0034724 | CG3624  | P{TRIP.HMS01619}attP2  |
| 53962  | CG3625  | FBgn0031245 | CG3625  | P{TRIP.HMJ21344}attP40 |
| 50997  | CG3631  | FBgn0038268 | CG3631  | P{TRIP.HMJ21110}attP40 |
| 38341  | CG3632  | FBgn0030735 | CG3632  | P{TRIP.HMS01808}attP2  |
| 44549  | CG3649  | FBgn0034785 | CG3649  | P{TRIP.HMC02946}attP2  |
| 53028  | CG3651  | FBgn0032974 | CG3651  | P{TRIP.HMJ21753}attP40 |
| 43249  | CG3662  | FBgn0031285 | CG3662  | P{TRIP.GLC01437}attP2  |
| 40920  | CG3678  | FBgn0038461 | CG3678  | P{TRIP.HMS02168}attP2  |
| 36582  | CG3679  | FBgn0027521 | CG3679  | P{TRIP.GL00542}attP2   |
| 42487  | CG3683  | FBgn0035046 | CG3683  | P{TRIP.HM05244}attP2   |
| 32883  | CG3689  | FBgn0035987 | CG3689  | P{TRIP.HMS000671}attP2 |
| 27688  | CG3690  | FBgn0040350 | CG3690  | P{TRIP.JF02768}attP2   |
| 34658  | CG3700  | FBgn0034796 | CG3700  | P{TRIP.HMS01135}attP2  |
| 29596  | CG3703  | FBgn0040348 | CG3703  | P{TRIP.JF03275}attP2   |
| 55294  | CG3704  | FBgn0040346 | CG3704  | P{TRIP.HMC03981}attP2  |
| 33422  | CG3711  | FBgn0040344 | CG3711  | P{TRIP.HMS00306}attP2  |
| 57273  | CG3726  | FBgn0029824 | CG3726  | P{TRIP.HMC04668}attP40 |
| 51822  | CG3731  | FBgn0038271 | CG3731  | P{TRIP.HMC03394}attP2  |
| 57275  | CG3732  | FBgn0034750 | CG3732  | P{TRIP.HMC04671}attP40 |
| 57490  | CG3764  | FBgn0036684 | CG3764  | P{TRIP.HMC04804}attP40 |
| 42917  | CG3773  | FBgn0038692 | CG3773  | P{TRIP.HMS02610}attP40 |
| 56971  | CG3800  | FBgn0034802 | CG3800  | P{TRIP.HMC03698}attP40 |
| 35731  | CG3803  | FBgn0034938 | CG3803  | P{TRIP.HMS01473}attP2  |
| 33354  | CG3814  | FBgn0025692 | CG3814  | P{TRIP.HMS00225}attP2  |
| 56908  | CG3815  | FBgn0029861 | CG3815  | P{TRIP.HMS04327}attP40 |
| 25852  | CG3822  | FBgn0038837 | CG3822  | P{TRIP.JF01873}attP2   |
| 55245  | CG3829  | FBgn0035091 | CG3829  | P{TRIP.HMC02428}attP2  |
| 53355  | CG3835  | FBgn0023507 | CG3835  | P{TRIP.HMC03584}attP40 |
| 42609  | CG3837  | FBgn0038279 | CG3837  | P{TRIP.HMS02444}attP40 |
| 35277  | CG3837  | FBgn0038279 | CG3837  | P{TRIP.GL00178}attP2   |
| 39030  | CG3842  | FBgn0029866 | CG3842  | P{TRIP.HMS01949}attP40 |
| 57557  | CG3847  | FBgn0029867 | CG3847  | P{TRIP.HMC04874}attP40 |
| 53265  | CG3887  | FBgn0031670 | CG3887  | P{TRIP.GLC01826}attP2  |
| 105430 | CG3887  | FBgn0031670 | CG3887  | VDRC.105430            |
| 42618  | CG3894  | FBgn0035059 | CG3894  | P{TRIP.HMS02453}attP2  |
| 56880  | CG3902  | FBgn0036824 | CG3902  | P{TRIP.HMC04101}attP2  |
| 57377  | CG3909  | FBgn0027524 | CG3909  | P{TRIP.HMC04664}attP40 |
| 43992  | CG3916  | FBgn0038003 | CG3916  | P{TRIP.HMS02705}attP2  |
| 33355  | CG3919  | FBgn0036423 | CG3919  | P{TRIP.HMS00226}attP2  |
| 54467  | CG3925  | FBgn0037780 | CG3925  | P{TRIP.HMC03735}attP40 |
| 31880  | CG3940  | FBgn0037788 | CG3940  | P{TRIP.JF02155}attP2   |
| 57568  | CG3961  | FBgn0036821 | CG3961  | P{TRIP.HMC04885}attP40 |
| 28777  | CG3967  | FBgn0035989 | CG3967  | P{TRIP.JF03205}attP2   |
| 27997  | CG3995  | FBgn0038472 | CG3995  | P{TRIP.JF02831}attP2   |
| 57487  | CG3999  | FBgn0037801 | CG3999  | P{TRIP.HMC04800}attP40 |
| 43235  | CG40002 | FBgn0058002 | CG40002 | P{TRIP.GLC01422}attP2  |
| 41964  | CG40005 | FBgn0058005 | CG40005 | P{TRIP.HMS02361}attP2  |
| 34691  | CG40006 | FBgn0058006 | CG40006 | P{TRIP.HMS01170}attP2  |
| 43980  | CG4009  | FBgn0038469 | CG4009  | P{TRIP.GL01590}attP40  |
| 35779  | CG40127 | FBgn0262116 | CG40127 | P{TRIP.HMS01529}attP2  |
| 44268  | CG40160 | FBgn0058160 | CG40160 | P{TRIP.HMS02730}attP40 |
| 44578  | CG40178 | FBgn0058178 | CG40178 | P{TRIP.HMS02874}attP2  |
| 52996  | CG4030  | FBgn0034585 | CG4030  | P{TRIP.HMJ21709}attP40 |
| 41980  | CG40378 | FBgn0058378 | CG40378 | P{TRIP.HMS02378}attP2  |
| 34013  | CG4038  | FBgn0011824 | CG4038  | P{TRIP.HMS00979}attP2  |
| 35332  | CG4041  | FBgn0029736 | CG4041  | P{TRIP.GL00239}attP2   |
| 57223  | CG4041  | FBgn0029736 | CG4041  | P{TRIP.HMC04606}attP40 |
| 57291  | CG4042  | FBgn0037018 | CG4042  | P{TRIP.HMJ21289}attP40 |
| 58062  | CG40470 | FBgn0058470 | CG40470 | P{TRIP.HMJ21918}attP40 |
| 34077  | CG4049  | FBgn0034976 | CG4049  | P{TRIP.HMS00584}attP2  |
| 52872  | CG4053  | FBgn0038482 | CG4053  | P{TRIP.HMC03610}attP40 |

|        |                 |                         |                 |                        |
|--------|-----------------|-------------------------|-----------------|------------------------|
| 32973  | CG4078          | FBgn0029798             | CG4078          | P(TRIP.HMS00770)attP2  |
| 58235  | CG40930         | FBgn0085538             | CG40930         | P(TRIP.HMJ22255)attP40 |
| 44522  | CG4096          | FBgn0029791             | CG4096          | P(TRIP.HMC02914)attP2  |
| 34559  | CG4098          | FBgn0036648             | CG4098          | P(TRIP.HMS01031)attP2  |
| 40876  | CG41087         | FBgn0069947             | CG41087         | P(TRIP.HMS02043)attP40 |
| 34883  | CG41099         | FBgn0039955             | CG41099         | P(TRIP.HMS01228)attP2  |
| 35814  | CG4115          | FBgn0038017             | CG4115          | P(TRIP.HMS01446)attP2  |
| 55668  | CG4119          | FBgn0028474             | CG4119          | P(TRIP.HMC03823)attP40 |
| 28370  | CG4133          | FBgn0031257             | CG4133          | P(TRIP.JF03007)attP2   |
| 44637  | CG41378         | FBgn0085638             | CG41378         | P(TRIP.GLC01600)attP2  |
| 53288  | CG4159          | FBgn0038811             | CG4159          | P(TRIP.HMC03504)attP40 |
| 37507  | CG4164          | FBgn0031256             | CG4164          | P(TRIP.HMS01649)attP40 |
| 28736  | CG4168          | FBgn0028888             | CG4168          | P(TRIP.JF03163)attP2   |
| 36845  | CG4174,CG13380  | FBgn0036793,FBgn0036799 | CG4174,CG13380  | P(TRIP.GL01100)attP2   |
| 41976  | CG4203          | FBgn0038300             | CG4203          | P(TRIP.HMS02374)attP2  |
| 50615  | CG4210          | FBgn0038302             | CG4210          | P(TRIP.HMC02982)attP2  |
| 31065  | CG4221          | FBgn0038385             | CG4221          | P(TRIP.JF01515)attP2   |
| 33365  | CG42231         | FBgn0087041             | CG42231         | P(TRIP.HMS00237)attP2  |
| 35682  | CG42232         | FBgn0250754             | CG42232         | P(TRIP.GLV21047)attP2  |
| 34986  | CG42233         | FBgn0250755             | CG42233         | P(TRIP.HMS01396)attP2  |
| 102495 | CG42233         | FBgn0250755             | CG42233         | VDR.C.102495           |
| 50918  | CG42235         | FBgn0250757             | CG42235         | P(TRIP.HMJ21007)attP40 |
| 25877  | CG42237         | FBgn0250862             | CG42237         | P(TRIP.JF01916)attP2   |
| 51023  | CG42238         | FBgn0250867             | CG42238         | P(TRIP.HMJ21149)attP40 |
| 33676  | CG42245         | FBgn0250911             | CG42245         | P(TRIP.HMS00540)attP2  |
| 38955  | CG42249         | FBgn0259101             | CG42249         | P(TRIP.HMS01869)attP2  |
| 26723  | CG42260         | FBgn0259145             | CG42260         | P(TRIP.JF02265)attP2   |
| 29411  | CG42271         | FBgn0259166             | CG42271         | P(TRIP.JF03347)attP2   |
| 44028  | CG42296         | FBgn0259192             | CG42296         | P(TRIP.HMS02744)attP40 |
| 34951  | CG42307         | FBgn0259203             | CG42307         | P(TRIP.HMS00381)attP2  |
| 42853  | CG42308         | FBgn0259204             | CG42308         | P(TRIP.HMS02545)attP40 |
| 28558  | CG42321         | FBgn0259221             | CG42321         | P(TRIP.HMS0044)attP2   |
| 33356  | CG42327         | FBgn0259227             | CG42327         | P(TRIP.HMS00227)attP2  |
| 27257  | CG42340         | FBgn0259242             | CG42340         | P(TRIP.JF02564)attP2   |
| 28648  | CG42342         | FBgn0259244             | CG42342         | P(TRIP.JF03063)attP2   |
| 38310  | CG42343         | FBgn0259245             | CG42343         | P(TRIP.HMS01774)attP40 |
| 28958  | CG42346         | FBgn0259677             | CG42346         | P(TRIP.HMS05169)attP2  |
| 26735  | CG42347         | FBgn0259678             | CG42347         | P(TRIP.JF02277)attP2   |
| 36853  | CG42353,CG42354 | FBgn0259699,FBgn0259700 | CG42353,CG42354 | P(TRIP.GL01112)attP2   |
| 28937  | CG42355         | FBgn0259701             | CG42355         | P(TRIP.HMS05148)attP2  |
| 32980  | CG42358         | FBgn0259704             | CG42358         | P(TRIP.HMS00780)attP2  |
| 51007  | CG42365         | FBgn0259711             | CG42365         | P(TRIP.HMJ21123)attP40 |
| 38936  | CG42368         | FBgn0259714             | CG42368         | P(TRIP.HMS01718)attP40 |
| 51416  | CG42374         | FBgn0259720             | CG42374         | P(TRIP.GLC01794)attP2  |
| 32425  | CG42376         | FBgn0259722             | CG42376         | P(TRIP.HMS00420)attP2  |
| 19280  | CG42376         | FBgn0259722             | CG42376         | VDR.C.19280            |
| 51890  | CG42379         | FBgn0259725             | CG42379         | P(TRIP.HMC03464)attP40 |
| 36086  | CG4238          | FBgn0031384             | CG4238          | P(TRIP.GL00505)attP2   |
| 51890  | CG42380         | FBgn0259726             | CG42380         | P(TRIP.HMC03464)attP40 |
| 51890  | CG42381         | FBgn0259727             | CG42381         | P(TRIP.HMC03464)attP40 |
| 55652  | CG42382         | FBgn0259728             | CG42382         | P(TRIP.HMC03801)attP40 |
| 42776  | CG42388         | FBgn0259734             | CG42388         | P(TRIP.GL01145)attP2   |
| 42760  | CG42445         | FBgn0259916             | CG42445         | P(TRIP.GL00715)attP2   |
| 42506  | CG42458         | FBgn0259935             | CG42458         | P(TRIP.HMJ02071)attP40 |
| 57208  | CG42490         | FBgn0086200             | CG42490         | P(TRIP.HMC04591)attP40 |
| 58285  | CG42494         | FBgn0260026             | CG42494         | P(TRIP.HMJ22370)attP40 |
| 53948  | CG42497, Tim 10 | FBgn0027360,FBgn0260223 | CG42497, Tim 10 | P(TRIP.HMJ21312)attP40 |
| 58058  | CG42503, Mocs 2 | FBgn0039280,FBgn0260229 | CG42503, Mocs 2 | P(TRIP.HMJ21913)attP40 |
| 57457  | CG42516 Pbp49   | FBgn0260390,FBgn0260398 | CG42516 Pbp49   | P(TRIP.HMC04766)attP40 |
| 33678  | CG42518         | FBgn0260392             | CG42518         | P(TRIP.HMS00542)attP2  |
| 31868  | CG42527         | FBgn0260432             | CG42527         | P(TRIP.HMS05260)attP2  |
| 42959  | CG42529         | FBgn0260434             | CG42529         | P(TRIP.HMS02652)attP40 |
| 54817  | CG42533         | FBgn0260486             | CG42533         | P(TRIP.HMJ21536)attP40 |
| 31509  | CG42534         | FBgn0260487             | CG42534         | P(TRIP.JF01064)attP2   |
| 58345  | CG42541         | FBgn0260658             | CG42541         | P(TRIP.HMJ22476)attP40 |
| 35736  | CG42542         | FBgn0260659             | CG42542         | P(TRIP.HMS01478)attP2  |
| 50562  | CG42565         | FBgn0260767             | CG42565         | P(TRIP.GLC01682)attP2  |
| 34549  | CG42575         | FBgn0260795             | CG42575         | P(TRIP.HMS01021)attP2  |

|       |         |             |         |                        |
|-------|---------|-------------|---------|------------------------|
| 58079 | CG42588 | FBgn0260965 | CG42588 | P{TRiP.HMJ21971}attP40 |
| 35006 | CG42594 | FBgn0260971 | CG42594 | P{TRiP.HMS01416}attP2  |
| 31731 | CG42629 | FBgn0261388 | CG42629 | P{TRiP.HM04040}attP2   |
| 28054 | CG42630 | FBgn0261353 | CG42630 | P{TRiP.JF02890}attP2   |
| 31673 | CG42638 | FBgn0261361 | CG42638 | P{TRiP.JF01466}attP2   |
| 55354 | CG4266  | FBgn0034598 | CG4266  | P{TRiP.HMC04041}attP40 |
| 54808 | CG42663 | FBgn0261545 | CG42663 | P{TRiP.HMJ21502}attP40 |
| 33665 | CG42666 | FBgn0261548 | CG42666 | P{TRiP.HMS00075}attP2  |
| 34743 | CG42668 | FBgn0261550 | CG42668 | P{TRiP.HMS01223}attP2  |
| 34016 | CG42669 | FBgn0261551 | CG42669 | P{TRiP.HMS00985}attP2  |
| 32332 | CG4267  | FBgn0031405 | CG4267  | P{TRiP.HMS00323}attP2  |
| 36844 | CG42671 | FBgn0261553 | CG42671 | P{TRiP.GL01098}attP2   |
| 31737 | CG42672 | FBgn0261554 | CG42672 | P{TRiP.HM04046}attP2   |
| 36629 | CG42673 | FBgn0261555 | CG42673 | P{TRiP.GL00589}attP2   |
| 34943 | CG42674 | FBgn0261556 | CG42674 | P{TRiP.HMS00228}attP2  |
| 37500 | CG42678 | FBgn0261564 | CG42678 | P{TRiP.HMS01642}attP40 |
| 21114 | CG42678 | FBgn0261564 | CG42678 | VDRC.21114             |
| 26020 | CG42683 | FBgn0261569 | CG42683 | P{TRiP.JF02045}attP2   |
| 54056 | CG42684 | FBgn0261570 | CG42684 | P{TRiP.HMS03717}attP40 |
| 35005 | CG42685 | FBgn0261571 | CG42685 | P{TRiP.HMS01415}attP2  |
| 34591 | CG42699 | FBgn0261610 | CG42699 | P{TRiP.HMS01065}attP2  |
| 28581 | CG42709 | FBgn0261674 | CG42709 | P{TRiP.HM05068}attP2   |
| 52873 | CG4271  | FBgn0031409 | CG4271  | P{TRiP.HMC03611}attP40 |
| 33737 | CG42724 | FBgn0261641 | CG42724 | P{TRiP.HMS00621}attP2  |
| 58166 | CG42729 | FBgn0261682 | CG42729 | P{TRiP.HMJ22143}attP40 |
| 32034 | CG42732 | FBgn0261698 | CG42732 | P{TRiP.JF03426}attP2   |
| 34725 | CG42788 | FBgn0261859 | CG42788 | P{TRiP.HMS01204}attP2  |
| 25874 | CG42796 | FBgn0261929 | CG42796 | P{TRiP.JF01913}attP2   |
| 51767 | CG42797 | FBgn0261931 | CG42797 | P{TRiP.HMC03322}attP40 |
| 41890 | CG4281  | FBgn0025626 | CG4281  | P{TRiP.GL01302}attP40  |
| 56045 | CG42813 | FBgn0261995 | CG42813 | P{TRiP.HMS04248}attP2  |
| 25882 | CG42817 | FBgn0261999 | CG42817 | P{TRiP.JF01922}attP2   |
| 26313 | CG4282  | FBgn0034114 | CG4282  | P{TRiP.JF02086}attP2   |
| 42623 | CG42820 | FBgn0262002 | CG42820 | P{TRiP.HMS02458}attP40 |
| 42878 | CG42827 | FBgn0262009 | CG42827 | P{TRiP.HMS02571}attP2  |
| 43996 | CG42828 | FBgn0262010 | CG42828 | P{TRiP.HMS02710}attP2  |
| 29305 | CG4288  | FBgn0038799 | CG4288  | P{TRiP.JF02445}attP2   |
| 42624 | CG4294  | FBgn0034742 | CG4294  | P{TRiP.HMS02459}attP40 |
| 52924 | CG4300  | FBgn0036272 | CG4300  | P{TRiP.HMC03665}attP40 |
| 41967 | CG4302  | FBgn0027073 | CG4302  | P{TRiP.HMS02364}attP2  |
| 28069 | CG43066 | FBgn0262476 | CG43066 | P{TRiP.JF02906}attP2   |
| 29312 | CG43073 | FBgn0262483 | CG43073 | P{TRiP.JF02471}attP2   |
| 32960 | CG4313  | FBgn0025632 | CG4313  | P{TRiP.HMS00755}attP2  |
| 31885 | CG43143 | FBgn0262617 | CG43143 | P{TRiP.JF02162}attP2   |
| 51431 | CG43154 | FBgn0262684 | CG43154 | P{TRiP.HMC03139}attP40 |
| 27033 | CG43155 | FBgn0262685 | CG43155 | P{TRiP.JF02359}attP2   |
| 55299 | CG43155 | FBgn0262685 | CG43155 | TRiP.HMC03986}attP2    |
| 50958 | CG43163 | FBgn0262719 | CG43163 | P{TRiP.HMJ21060}attP40 |
| 42584 | CG43173 | FBgn0262792 | CG43173 | P{TRiP.HMS02369}attP2  |
| 51720 | CG4318  | FBgn0030455 | CG4318  | P{TRiP.HMC03257}attP2  |
| 42617 | CG43202 | FBgn0262838 | CG43202 | P{TRiP.HMS02452}attP2  |
| 27987 | CG4328  | FBgn0036274 | CG4328  | P{TRiP.JF02314}attP2   |
| 54035 | CG4329  | FBgn0034745 | CG4329  | P{TRiP.HMJ21478}attP40 |
| 53990 | CG43313 | FBgn0263005 | CG43313 | P{TRiP.HMJ21394}attP40 |
| 58054 | CG43319 | FBgn0263024 | CG43319 | P{TRiP.HMC04958}attP40 |
| 34352 | CG4332  | FBgn0030456 | CG4332  | P{TRiP.HMS01341}attP2  |
| 34606 | CG43320 | FBgn0263025 | CG43320 | P{TRiP.HMS00577}attP2  |
| 55167 | CG4334  | FBgn0038312 | CG4334  | P{TRiP.HMC03846}attP40 |
| 41926 | CG43340 | FBgn0263077 | CG43340 | P{TRiP.HMS02323}attP2  |
| 54848 | CG43343 | FBgn0263048 | CG43343 | P{TRiP.HMJ21585}attP40 |
| 31160 | CG43346 | FBgn0263051 | CG43346 | P{TRiP.JF01653}attP2   |
| 57724 | CG43347 | FBgn0263072 | CG43347 | P{TRiP.HMC04913}attP40 |
| 57768 | CG4335  | FBgn0038795 | CG4335  | P{TRiP.HMC04962}attP40 |
| 26514 | CG4335  | FBgn0038795 | CG4335  | VDRC.26514             |
| 33921 | CG43355 | FBgn0263087 | CG43355 | P{TRiP.HMS00866}attP2  |
| 42754 | CG43367 | FBgn0263110 | CG43367 | P{TRiP.GL00709}attP2   |
| 31575 | CG4338  | FBgn0038313 | CG4338  | P{TRiP.JF01148}attP2   |
| 44509 | CG4341  | FBgn0028481 | CG4341  | P{TRiP.HMC02899}attP2  |

|        |         |             |         |                        |
|--------|---------|-------------|---------|------------------------|
| 52982  | CG43427 | FBgn0263346 | CG43427 | P{TRiP.HMJ21669}attP40 |
| 51813  | CG4360  | FBgn0038787 | CG4360  | P{TRiP.HMC03384}attP2  |
| 36090  | CG4365  | FBgn0037024 | CG4365  | P{TRiP.GL00509}attP2   |
| 53290  | CG4365  | FBgn0037024 | CG4365  | P{TRiP.HMC03506}attP40 |
| 32341  | CG43658 | FBgn0263706 | CG43658 | P{TRiP.HMS00332}attP2  |
| 44077  | CG4367  | FBgn0038783 | CG4367  | P{TRiP.HMS02794}attP40 |
| 31375  | CG43674 | FBgn0263749 | CG43674 | P{TRiP.JF01342}attP2   |
| 57462  | CG43675 | FBgn0263750 | CG43675 | P{TRiP.HMC04772}attP40 |
| 26715  | CG43689 | FBgn0263772 | CG43689 | P{TRiP.JF02255}attP2   |
| 35696  | CG43693 | FBgn0263776 | CG43693 | P{TRiP.GLV21061}attP2  |
| 52999  | CG43729 | FBgn0263980 | CG43729 | P{TRiP.HMJ21714}attP40 |
| 57775  | CG4374  | FBgn0039078 | CG4374  | P{TRiP.HMC04969}attP40 |
| 43226  | CG43783 | FBgn0264305 | CG43783 | P{TRiP.GL01571}attP2   |
| 51472  | CG43795 | FBgn0264339 | CG43795 | P{TRiP.HMC03214}attP2  |
| 50933  | CG43816 | FBgn0264364 | CG43816 | P{TRiP.HMJ21027}attP40 |
| 52898  | CG4386  | FBgn0034661 | CG4386  | P{TRiP.HMC03637}attP40 |
| 32873  | CG4389  | FBgn0028479 | CG4389  | P{TRiP.HMS00660}attP2  |
| 50718  | CG43894 | FBgn0264486 | CG43894 | P{TRiP.HMS02952}attP40 |
| 42585  | CG43896 | FBgn0264488 | CG43896 | P{TRiP.HMS02417}attP40 |
| 42836  | CG4390  | FBgn0038771 | CG4390  | P{TRiP.HMS02528}attP40 |
| 106327 | CG4390  | FBgn0038771 | CG4390  | VDRC.106327            |
| 57239  | CG43902 | FBgn0264503 | CG43902 | P{TRiP.HMC04625}attP40 |
| 58087  | CG4393  | FBgn0039075 | CG4393  | P{TRiP.HMJ21979}attP40 |
| 29623  | CG4395  | FBgn0030437 | CG4395  | P{TRiP.JF03302}attP2   |
| 57167  | CG43980 | FBgn0264711 | CG43980 | P{TRiP.HMC04548}attP40 |
| 42533  | CG4400  | FBgn0030434 | CG4400  | P{TRiP.HMJ02100}attP40 |
| 57463  | CG44002 | FBgn0264744 | CG44002 | P{TRiP.HMC04774}attP40 |
| 31923  | CG4404  | FBgn0030432 | CG4404  | P{TRiP.JF02213}attP2   |
| 44055  | CG4407  | FBgn0030431 | CG4407  | P{TRiP.HMS02772}attP40 |
| 35613  | CG4415  | FBgn0031296 | CG4415  | P{TRiP.GL00456}attP2   |
| 43218  | CG4424  | FBgn0038765 | CG4424  | P{TRiP.GL01563}attP40  |
| 42565  | CG44245 | FBgn0265180 | CG44245 | P{TRiP.HMJ02222}attP40 |
| 55271  | CG44252 | FBgn0265187 | CG44252 | P{TRiP.HMC03958}attP40 |
| 44658  | CG44253 | FBgn0265188 | CG44253 | P{TRiP.HMC02440}attP2  |
| 43209  | CG44325 | FBgn0265413 | CG44325 | P{TRiP.GL01554}attP40  |
| 57484  | CG4434  | FBgn0039071 | CG4434  | P{TRiP.HMC04797}attP40 |
| 53298  | CG4461  | FBgn0035982 | CG4461  | P{TRiP.HMC03517}attP2  |
| 38930  | CG4476  | FBgn0035969 | CG4476  | P{TRiP.GL01082}attP2   |
| 41909  | CG4495  | FBgn0031893 | CG4495  | P{TRiP.HMS02302}attP2  |
| 51428  | CG4496  | FBgn0031894 | CG4496  | P{TRiP.HMC03034}attP2  |
| 35489  | CG4502  | FBgn0031896 | CG4502  | P{TRiP.GL00418}attP2   |
| 51018  | CG4511  | FBgn0037843 | CG4511  | P{TRiP.HMJ21142}attP40 |
| 52989  | CG4538  | FBgn0038745 | CG4538  | P{TRiP.HMJ21681}attP40 |
| 55190  | CG4542  | FBgn0029906 | CG4542  | P{TRiP.HMC03884}attP40 |
| 55977  | CG4546  | FBgn0038373 | CG4546  | P{TRiP.HMC04273}attP40 |
| 57284  | CG4553  | FBgn0039336 | CG4553  | P{TRiP.HMC04681}attP40 |
| 53270  | CG4554  | FBgn0034734 | CG4554  | P{TRiP.HMC03176}attP2  |
| 50953  | CG4557  | FBgn0029912 | CG4557  | P{TRiP.HMJ21054}attP40 |
| 58225  | CG4558  | FBgn0029914 | CG4558  | P{TRiP.HMJ22233}attP40 |
| 32842  | CG4562  | FBgn0038740 | CG4562  | P{TRiP.HMS00623}attP2  |
| 32893  | CG4565  | FBgn0037841 | CG4565  | P{TRiP.HMS00682}attP2  |
| 57378  | CG4570  | FBgn0037844 | CG4570  | P{TRiP.HMC04676}attP40 |
| 34337  | CG4572  | FBgn0038738 | CG4572  | P{TRiP.HMS01325}attP2  |
| 36103  | CG4585  | FBgn0025335 | CG4585  | P{TRiP.HM05273}attP2   |
| 58081  | CG4586  | FBgn0029924 | CG4586  | P{TRiP.HMJ21973}attP40 |
| 25893  | CG4587  | FBgn0028863 | CG4587  | P{TRiP.JF01934}attP2   |
| 28617  | CG4596  | FBgn0037849 | CG4596  | P{TRiP.JF03032}attP2   |
| 25993  | CG4617  | FBgn0029936 | CG4617  | P{TRiP.JF02015}attP2   |
| 51903  | CG4623  | FBgn0035587 | CG4623  | P{TRiP.HMC03477}attP40 |
| 27310  | CG4629  | FBgn0031299 | CG4629  | P{TRiP.JF02618}attP2   |
| 56874  | CG4650  | FBgn0032549 | CG4650  | P{TRiP.HMC03878}attP40 |
| 42012  | CG4653  | FBgn0030776 | CG4653  | P{TRiP.HMS02413}attP40 |
| 55939  | CG4666  | FBgn0029838 | CG4666  | P{TRiP.HMC04227}attP40 |
| 29307  | CG4670  | FBgn0033814 | CG4670  | P{TRiP.JF02447}attP2   |
| 34660  | CG4674  | FBgn0037856 | CG4674  | P{TRiP.HMS01137}attP2  |
| 44491  | CG4678  | FBgn0030778 | CG4678  | P{TRiP.HMC02413}attP2  |
| 25873  | CG4681  | FBgn0069913 | CG4681  | P{TRiP.JF01912}attP2   |
| 51359  | CG4706  | FBgn0037862 | CG4706  | P{TRiP.HMC03203}attP2  |

|       |        |             |        |                        |
|-------|--------|-------------|--------|------------------------|
| 58229 | CG4707 | FBgn0035036 | CG4707 | P(TRIP.HMJ22249)attP40 |
| 50568 | CG4729 | FBgn0036623 | CG4729 | P(TRIP.GL.C01689)attP2 |
| 56025 | CG4743 | FBgn0039357 | CG4743 | P(TRIP.HMC04321)attP40 |
| 41698 | CG4747 | FBgn0043456 | CG4747 | P(TRIP.HMS02263)attP40 |
| 42838 | CG4747 | FBgn0043456 | CG4747 | P(TRIP.HMS02530)attP40 |
| 58337 | CG4752 | FBgn0034733 | CG4752 | P(TRIP.HMJ22467)attP40 |
| 38963 | CG4764 | FBgn0031310 | CG4764 | P(TRIP.HMS01877)attP40 |
| 50605 | CG4766 | FBgn0027546 | CG4766 | P(TRIP.HMC02404)attP2  |
| 34583 | CG4769 | FBgn0035600 | CG4769 | P(TRIP.HMS01057)attP2  |
| 33358 | CG4785 | FBgn0031314 | CG4785 | P(TRIP.HMS00230)attP2  |
| 58215 | CG4788 | FBgn0032354 | CG4788 | P(TRIP.HMJ22223)attP40 |
| 55621 | CG4793 | FBgn0028514 | CG4793 | P(TRIP.HMC03765)attP40 |
| 56010 | CG4802 | FBgn0034215 | CG4802 | P(TRIP.HMC04306)attP40 |
| 41919 | CG4815 | FBgn0039568 | CG4815 | P(TRIP.HMS02316)attP2  |
| 25894 | CG4822 | FBgn0031220 | CG4822 | P(TRIP.JF01935)attP2   |
| 57155 | CG4830 | FBgn0037996 | CG4830 | P(TRIP.HMC04535)attP40 |
| 27046 | CG4839 | FBgn0032187 | CG4839 | P(TRIP.JF02372)attP2   |
| 42655 | CG4847 | FBgn0034229 | CG4847 | P(TRIP.HMS02491)attP2  |
| 38943 | CG4848 | FBgn0037998 | CG4848 | P(TRIP.HMS01857)attP40 |
| 40559 | CG4848 | FBgn0037998 | CG4848 | VDRC.40559             |
| 40828 | CG4849 | FBgn0039566 | CG4849 | P(TRIP.HMS01994)attP40 |
| 31123 | CG4853 | FBgn0034230 | CG4853 | P(TRIP.JF01596)attP2   |
| 42833 | CG4854 | FBgn0038766 | CG4854 | P(TRIP.HMS02525)attP40 |
| 50960 | CG4858 | FBgn0037011 | CG4858 | P(TRIP.HMJ21064)attP40 |
| 28738 | CG4872 | FBgn0030799 | CG4872 | P(TRIP.JF03165)attP2   |
| 34395 | CG4877 | FBgn0036624 | CG4877 | P(TRIP.HMS01012)attP2  |
| 44648 | CG4892 | FBgn0028884 | CG4892 | P(TRIP.HMC02356)attP2  |
| 38287 | CG4893 | FBgn0036616 | CG4893 | P(TRIP.HMS01740)attP40 |
| 56977 | CG4901 | FBgn0032194 | CG4901 | P(TRIP.HMC04417)attP40 |
| 42602 | CG4907 | FBgn0039010 | CG4907 | P(TRIP.HMS02435)attP40 |
| 31075 | CG4908 | FBgn0032195 | CG4908 | P(TRIP.JF01526)attP2   |
| 31062 | CG4911 | FBgn0035959 | CG4911 | P(TRIP.JF01511)attP2   |
| 55409 | CG4927 | FBgn0034139 | CG4927 | P(TRIP.HMC04097)attP40 |
| 42496 | CG4933 | FBgn0036615 | CG4933 | P(TRIP.HMJ02060)attP40 |
| 55894 | CG4945 | FBgn0034137 | CG4945 | P(TRIP.HMC04173)attP2  |
| 42812 | CG4949 | FBgn0030813 | CG4949 | P(TRIP.GL01186)attP2   |
| 30508 | CG4950 | FBgn0036587 | CG4950 | P(TRIP.HM05252)attP2   |
| 42784 | CG4951 | FBgn0039563 | CG4951 | P(TRIP.GL01154)attP2   |
| 58272 | CG4955 | FBgn0030814 | CG4955 | P(TRIP.HMJ22355)attP40 |
| 50576 | CG4957 | FBgn0032205 | CG4957 | P(TRIP.GL.C01698)attP2 |
| 35615 | CG4968 | FBgn0032214 | CG4968 | P(TRIP.GL00459)attP2   |
| 57027 | CG4973 | FBgn0038772 | CG4973 | P(TRIP.HMS04472)attP40 |
| 43303 | CG4988 | FBgn0032372 | CG4988 | P(TRIP.HMS02676)attP40 |
| 44450 | CG4991 | FBgn0030817 | CG4991 | P(TRIP.GL.C01599)attP2 |
| 36078 | CG4998 | FBgn0036612 | CG4998 | P(TRIP.GL00497)attP2   |
| 32392 | CG5001 | FBgn0031322 | CG5001 | P(TRIP.HMS00386)attP2  |
| 55359 | CG5002 | FBgn0034275 | CG5002 | P(TRIP.HMC04046)attP40 |
| 31061 | CG5003 | FBgn0039554 | CG5003 | P(TRIP.JF01510)attP2   |
| 52882 | CG5009 | FBgn0027572 | CG5009 | P(TRIP.HMC03620)attP40 |
| 33359 | CG5022 | FBgn0032225 | CG5022 | P(TRIP.HMS00231)attP2  |
| 38309 | CG5026 | FBgn0035945 | CG5026 | P(TRIP.HMS01773)attP40 |
| 28305 | CG5027 | FBgn0036579 | CG5027 | P(TRIP.JF02936)attP2   |
| 35020 | CG5033 | FBgn0028744 | CG5033 | P(TRIP.HMS01433)attP2  |
| 44632 | CG5036 | FBgn0028743 | CG5036 | P(TRIP.HMC02405)attP2  |
| 31169 | CG5037 | FBgn0032222 | CG5037 | P(TRIP.JF01671)attP2   |
| 52917 | CG5044 | FBgn0038326 | CG5044 | P(TRIP.HMC03657)attP40 |
| 42494 | CG5059 | FBgn0037007 | CG5059 | P(TRIP.HMJ02058)attP40 |
| 51042 | CG5080 | FBgn0031313 | CG5080 | P(TRIP.HMJ21173)attP40 |
| 27313 | CG5098 | FBgn0034300 | CG5098 | P(TRIP.JF02622)attP2   |
| 34882 | CG5103 | FBgn0036784 | CG5103 | P(TRIP.HMS01227)attP2  |
| 32393 | CG5144 | FBgn0035957 | CG5144 | P(TRIP.HMS00387)attP2  |
| 35687 | CG5149 | FBgn0031904 | CG5149 | P(TRIP.GLV21052)attP2  |
| 31568 | CG5155 | FBgn0031905 | CG5155 | P(TRIP.JF01141)attP2   |
| 27660 | CG5160 | FBgn0031906 | CG5160 | P(TRIP.JF02739)attP2   |
| 32987 | CG5174 | FBgn0034345 | CG5174 | P(TRIP.HMS00787)attP2  |
| 32888 | CG5181 | FBgn0031909 | CG5181 | P(TRIP.HMS00676)attP2  |
| 59054 | CG5181 | FBgn0031909 | CG5181 | P(UAS-CG5181.RNAi)2    |
| 38308 | CG5189 | FBgn0034350 | CG5189 | P(TRIP.HMS01772)attP40 |

|       |        |             |        |                        |
|-------|--------|-------------|--------|------------------------|
| 44494 | CG5190 | FBgn0034351 | CG5190 | P(TRIP.HMC02423)attP2  |
| 36908 | CG5194 | FBgn0035955 | CG5194 | P(TRIP.GL01116)attP2   |
| 38968 | CG5198 | FBgn0032250 | CG5198 | P(TRIP.HMS01882)attP2  |
| 50650 | CG5214 | FBgn0037891 | CG5214 | P(TRIP.HMC03051)attP2  |
| 53285 | CG5220 | FBgn0038471 | CG5220 | P(TRIP.HMC03501)attP40 |
| 27694 | CG5235 | FBgn0036565 | CG5235 | P(TRIP.JF02774)attP2   |
| 54036 | CG5245 | FBgn0038047 | CG5245 | P(TRIP.HMJ21479)attP40 |
| 55410 | CG5246 | FBgn0038484 | CG5246 | P(TRIP.HMC04098)attP40 |
| 50623 | CG5254 | FBgn0040383 | CG5254 | P(TRIP.HMC02990)attP2  |
| 52874 | CG5255 | FBgn0038485 | CG5255 | P(TRIP.HMC03612)attP40 |
| 40922 | CG5261 | FBgn0031912 | CG5261 | P(TRIP.HMS02170)attP40 |
| 51755 | CG5262 | FBgn0036988 | CG5262 | P(TRIP.HMC03306)attP2  |
| 50987 | CG5267 | FBgn0034154 | CG5267 | P(TRIP.HMJ21097)attP40 |
| 52918 | CG5276 | FBgn0037900 | CG5276 | P(TRIP.HMC03658)attP40 |
| 44515 | CG5278 | FBgn0038986 | CG5278 | P(TRIP.HMC02905)attP2  |
| 51869 | CG5287 | FBgn0032477 | CG5287 | P(TRIP.HMC03443)attP40 |
| 50949 | CG5290 | FBgn0036772 | CG5290 | P(TRIP.HMJ21050)attP40 |
| 32500 | CG5292 | FBgn0038491 | CG5292 | P(TRIP.HMS00503)attP2  |
| 31211 | CG5316 | FBgn0038704 | CG5316 | P(TRIP.JF01730)attP2   |
| 44473 | CG5322 | FBgn0032253 | CG5322 | P(TRIP.HMC02357)attP2  |
| 44659 | CG5326 | FBgn0038983 | CG5326 | P(TRIP.HMC02892)attP2  |
| 32333 | CG5337 | FBgn0032249 | CG5337 | P(TRIP.HMS00324)attP2  |
| 36640 | CG5343 | FBgn0032248 | CG5343 | P(TRIP.GL00600)attP2   |
| 53977 | CG5377 | FBgn0038974 | CG5377 | P(TRIP.HMJ21366)attP40 |
| 54847 | CG5381 | FBgn0032218 | CG5381 | P(TRIP.HMJ21584)attP40 |
| 53262 | CG5384 | FBgn0032216 | CG5384 | P(TRIP.GL01823)attP2   |
| 52875 | CG5390 | FBgn0032213 | CG5390 | P(TRIP.HMC03613)attP40 |
| 44062 | CG5432 | FBgn0039425 | CG5432 | P(TRIP.HMS02779)attP40 |
| 34093 | CG5439 | FBgn0032476 | CG5439 | P(TRIP.HMS00914)attP2  |
| 40824 | CG5446 | FBgn0032429 | CG5446 | P(TRIP.HMS00624)attP2  |
| 33739 | CG5451 | FBgn0038666 | CG5451 | P(TRIP.HMS01075)attP2  |
| 43219 | CG5455 | FBgn0039430 | CG5455 | P(TRIP.GL01564)attP40  |
| 35758 | CG5466 | FBgn0038815 | CG5466 | P(TRIP.HMS01504)attP2  |
| 44080 | CG5510 | FBgn0039160 | CG5510 | P(TRIP.HMS02797)attP40 |
| 32928 | CG5514 | FBgn0039560 | CG5514 | P(TRIP.HMS00720)attP2  |
| 31142 | CG5522 | FBgn0034158 | CG5522 | P(TRIP.JF01617)attP2   |
| 36081 | CG5524 | FBgn0039164 | CG5524 | P(TRIP.GL00500)attP2   |
| 34531 | CG5527 | FBgn0039564 | CG5527 | P(TRIP.HMS01076)attP2  |
| 30486 | CG5541 | FBgn0030603 | CG5541 | P(TRIP.HM05228)attP2   |
| 30511 | CG5548 | FBgn0030605 | CG5548 | P(TRIP.HM05255)attP2   |
| 55402 | CG5555 | FBgn0038686 | CG5555 | P(TRIP.HMC04090)attP2  |
| 42594 | CG5556 | FBgn0031332 | CG5556 | P(TRIP.HMS02426)attP40 |
| 28962 | CG5567 | FBgn0036760 | CG5567 | P(TRIP.HM05173)attP2   |
| 51894 | CG5569 | FBgn0034919 | CG5569 | P(TRIP.HMC03468)attP40 |
| 32334 | CG5589 | FBgn0036754 | CG5589 | P(TRIP.HMS00325)attP2  |
| 25994 | CG5591 | FBgn0034926 | CG5591 | P(TRIP.JF02016)attP2   |
| 32876 | CG5599 | FBgn0030612 | CG5599 | P(TRIP.HMS00663)attP2  |
| 40892 | CG5608 | FBgn0038058 | CG5608 | P(TRIP.HMS02140)attP2  |
| 27318 | CG5618 | FBgn0036975 | CG5618 | P(TRIP.JF02627)attP2   |
| 25822 | CG5621 | FBgn0038840 | CG5621 | P(TRIP.JF01840)attP2   |
| 47551 | CG5621 | FBgn0038840 | CG5621 | VDRC.47551             |
| 35337 | CG5626 | FBgn0036266 | CG5626 | P(TRIP.GL00247)attP2   |
| 50959 | CG5642 | FBgn0036258 | CG5642 | P(TRIP.HMJ21061)attP40 |
| 28619 | CG5644 | FBgn0035948 | CG5644 | P(TRIP.JF03034)attP2   |
| 33360 | CG5646 | FBgn0039525 | CG5646 | P(TRIP.HMS00232)attP2  |
| 28564 | CG5656 | FBgn0037083 | CG5656 | P(TRIP.HM05050)attP2   |
| 34339 | CG5660 | FBgn0035942 | CG5660 | P(TRIP.HMS01327)attP2  |
| 44434 | CG5664 | FBgn0037082 | CG5664 | P(TRIP.GL01390)attP2   |
| 37517 | CG5665 | FBgn0036977 | CG5665 | P(TRIP.HMS01659)attP40 |
| 36655 | CG5694 | FBgn0032197 | CG5694 | P(TRIP.GL00615)attP2   |
| 51855 | CG5703 | FBgn0030853 | CG5703 | P(TRIP.HMC03429)attP40 |
| 34356 | CG5706 | FBgn0039175 | CG5706 | P(TRIP.HMS01345)attP2  |
| 53949 | CG5721 | FBgn0034315 | CG5721 | P(TRIP.HMJ21313)attP40 |
| 32335 | CG5726 | FBgn0034313 | CG5726 | P(TRIP.HMS00326)attP2  |
| 54021 | CG5727 | FBgn0032193 | CG5727 | P(TRIP.HMJ21447)attP40 |
| 36592 | CG5728 | FBgn0039182 | CG5728 | P(TRIP.GL00552)attP2   |
| 32394 | CG5745 | FBgn0038855 | CG5745 | P(TRIP.HMS00388)attP2  |
| 55964 | CG5756 | FBgn0034301 | CG5756 | P(TRIP.HMC04259)attP40 |

|       |        |             |        |                        |
|-------|--------|-------------|--------|------------------------|
| 35223 | CG5757 | FBgn0034299 | CG5757 | P{TRiP.GL00105}attP2   |
| 50719 | CG5770 | FBgn0034291 | CG5770 | P{TRiP.HMS02953}attP40 |
| 43299 | CG5776 | FBgn0032450 | CG5776 | P{TRiP.HMS02672}attP40 |
| 44121 | CG5791 | FBgn0040582 | CG5791 | P{TRiP.HMS02843}attP40 |
| 43206 | CG5800 | FBgn0030855 | CG5800 | P{TRiP.GL01551}attP40  |
| 38938 | CG5802 | FBgn0250820 | CG5802 | P{TRiP.HMS01771}attP40 |
| 34791 | CG5807 | FBgn0027539 | CG5807 | P{TRiP.HMS00100}attP2  |
| 55208 | CG5808 | FBgn0027617 | CG5808 | P{TRiP.HMC03925}attP40 |
| 31867 | CG5819 | FBgn0034717 | CG5819 | P{TRiP.HM05258}attP2   |
| 34079 | CG5830 | FBgn0036556 | CG5830 | P{TRiP.HMS01077}attP2  |
| 35776 | CG5844 | FBgn0038049 | CG5844 | P{TRiP.HMS01525}attP2  |
| 27668 | CG5853 | FBgn0032167 | CG5853 | P{TRiP.JF02747}attP2   |
| 51452 | CG5869 | FBgn0028894 | CG5869 | P{TRiP.HMC03184}attP40 |
| 36622 | CG5872 | FBgn0036991 | CG5872 | P{TRiP.GL00582}attP2   |
| 55690 | CG5877 | FBgn0030625 | CG5877 | P{TRiP.HMC03904}attP40 |
| 36913 | CG5880 | FBgn0039489 | CG5880 | P{TRiP.GL01121}attP2   |
| 55970 | CG5883 | FBgn0036225 | CG5883 | P{TRiP.HMC04265}attP40 |
| 27321 | CG5890 | FBgn0039380 | CG5890 | P{TRiP.JF02630}attP2   |
| 55969 | CG5897 | FBgn0036220 | CG5897 | P{TRiP.HMC04264}attP40 |
| 52876 | CG5909 | FBgn0039495 | CG5909 | P{TRiP.HMJ22814}attP40 |
| 53965 | CG5913 | FBgn0039385 | CG5913 | P{TRiP.HMJ21347}attP40 |
| 31080 | CG5924 | FBgn0032154 | CG5924 | P{TRiP.JF01531}attP2   |
| 42822 | CG5934 | FBgn0039505 | CG5934 | P{TRiP.HMS02504}attP40 |
| 55613 | CG5938 | FBgn0046247 | CG5938 | P{TRiP.HMC03752}attP40 |
| 55920 | CG5941 | FBgn0029833 | CG5941 | P{TRiP.HMC04207}attP40 |
| 35801 | CG5946 | FBgn0036211 | CG5946 | P{TRiP.GL00420}attP2   |
| 43257 | CG5953 | FBgn0032587 | CG5953 | P{TRiP.GLC01446}attP2  |
| 31368 | CG5961 | FBgn0038056 | CG5961 | P{TRiP.JF01332}attP2   |
| 33932 | CG5966 | FBgn0029831 | CG5966 | P{TRiP.HMS00881}attP2  |
| 50560 | CG5969 | FBgn0036998 | CG5969 | P{TRiP.GLC01680}attP2  |
| 55282 | CG6006 | FBgn0063649 | CG6006 | P{TRiP.HMC03969}attP40 |
| 34565 | CG6015 | FBgn0038927 | CG6015 | P{TRiP.HMS01037}attP2  |
| 52922 | CG6020 | FBgn0037001 | CG6020 | P{TRiP.HMC03662}attP40 |
| 28625 | CG6024 | FBgn0036202 | CG6024 | P{TRiP.JF03040}attP2   |
| 28610 | CG6044 | FBgn0034725 | CG6044 | P{TRiP.JF03025}attP2   |
| 35778 | CG6055 | FBgn0031918 | CG6055 | P{TRiP.HMS01528}attP2  |
| 34025 | CG6066 | FBgn0039488 | CG6066 | P{TRiP.HMS00995}attP2  |
| 54844 | CG6073 | FBgn0039417 | CG6073 | P{TRiP.HMJ21581}attP40 |
| 56038 | CG6126 | FBgn0038407 | CG6126 | P{TRiP.HMC04346}attP40 |
| 44017 | CG6153 | FBgn0032445 | CG6153 | P{TRiP.HMS02732}attP40 |
| 44021 | CG6154 | FBgn0039420 | CG6154 | P{TRiP.HMS02736}attP40 |
| 28917 | CG6178 | FBgn0039156 | CG6178 | P{TRiP.HM05128}attP2   |
| 42637 | CG6188 | FBgn0038074 | CG6188 | P{TRiP.HMS02473}attP40 |
| 56046 | CG6194 | FBgn0038325 | CG6194 | P{TRiP.HMS04249}attP2  |
| 51393 | CG6196 | FBgn0038323 | CG6196 | P{TRiP.HMJ21139}attP40 |
| 53294 | CG6206 | FBgn0027611 | CG6206 | P{TRiP.HMC03510}attP40 |
| 55203 | CG6209 | FBgn0033862 | CG6209 | P{TRiP.HMC03916}attP40 |
| 28386 | CG6218 | FBgn0038321 | CG6218 | P{TRiP.JF03023}attP2   |
| 51435 | CG6225 | FBgn0038072 | CG6225 | P{TRiP.HMC03149}attP40 |
| 53987 | CG6262 | FBgn0034121 | CG6262 | P{TRiP.HMJ21391}attP40 |
| 51436 | CG6271 | FBgn0039476 | CG6271 | P{TRiP.HMC03150}attP2  |
| 50744 | CG6271 | FBgn0039476 | CG6271 | VDRC.50744             |
| 33652 | CG6272 | FBgn0036126 | CG6272 | P{TRiP.HMS00057}attP2  |
| 27064 | CG6276 | FBgn0038316 | CG6276 | P{TRiP.JF02409}attP2   |
| 33958 | CG6277 | FBgn0039475 | CG6277 | P{TRiP.HMS00915}attP2  |
| 51498 | CG6283 | FBgn0039474 | CG6283 | P{TRiP.HMC03253}attP2  |
| 43154 | CG6287 | FBgn0032350 | CG6287 | P{TRiP.GL01495}attP2   |
| 52928 | CG6287 | FBgn0032350 | CG6287 | P{TRiP.HMC03669}attP40 |
| 51760 | CG6295 | FBgn0039471 | CG6295 | P{TRiP.HMC03312}attP2  |
| 44453 | CG6308 | FBgn0030645 | CG6308 | P{TRiP.GLC01605}attP2  |
| 28297 | CG6329 | FBgn0033872 | CG6329 | P{TRiP.JF02927}attP2   |
| 42851 | CG6353 | FBgn0038893 | CG6353 | P{TRiP.HMS02543}attP40 |
| 28745 | CG6356 | FBgn0039178 | CG6356 | P{TRiP.JF03173}attP2   |
| 43151 | CG6357 | FBgn0033875 | CG6357 | P{TRiP.GL01492}attP40  |
| 41947 | CG6359 | FBgn0038065 | CG6359 | P{TRiP.HMS02344}attP2  |
| 35351 | CG6364 | FBgn0263398 | CG6364 | P{TRiP.GL00263}attP2   |
| 33752 | CG6370 | FBgn0034277 | CG6370 | P{TRiP.HMS01092}attP2  |
| 51883 | CG6385 | FBgn0034276 | CG6385 | P{TRiP.HMC03457}attP40 |



|        |        |             |        |                        |
|--------|--------|-------------|--------|------------------------|
| 51882  | CG6401 | FBgn0034270 | CG6401 | P(TRIP.HMC03456)attP40 |
| 55983  | CG6403 | FBgn0039453 | CG6403 | P(TRIP.HMC04279)attP40 |
| 31237  | CG6412 | FBgn0032646 | CG6412 | P(TRIP.JF01745)attP2   |
| 51867  | CG6415 | FBgn0032287 | CG6415 | P(TRIP.HMC03441)attP40 |
| 32442  | CG6418 | FBgn0036104 | CG6418 | P(TRIP.HMS00440)attP2  |
| 42920  | CG6420 | FBgn0039451 | CG6420 | P(TRIP.HMS02613)attP40 |
| 55151  | CG6422 | FBgn0039261 | CG6422 | P(TRIP.HMC03791)attP40 |
| 55943  | CG6431 | FBgn0032289 | CG6431 | P(TRIP.HMC04231)attP40 |
| 44575  | CG6432 | FBgn0039184 | CG6432 | P(TRIP.HMS02871)attP2  |
| 44475  | CG6439 | FBgn0038922 | CG6439 | P(TRIP.HMC02361)attP2  |
| 35008  | CG6453 | FBgn0032643 | CG6453 | P(TRIP.HMS01418)attP2  |
| 43245  | CG6455 | FBgn0019960 | CG6455 | P(TRIP.GLC01432)attP2  |
| 34585  | CG6459 | FBgn0034259 | CG6459 | P(TRIP.HMS01059)attP2  |
| 55192  | CG6488 | FBgn0032361 | CG6488 | P(TRIP.HMC03886)attP40 |
| 104383 | CG6488 | FBgn0032361 | CG6488 | VDRC.104383            |
| 29452  | CG6495 | FBgn0027550 | CG6495 | P(TRIP.JF03388)attP2   |
| 34026  | CG6497 | FBgn0036704 | CG6497 | P(TRIP.HMS00996)attP2  |
| 27698  | CG6498 | FBgn0036511 | CG6498 | P(TRIP.JF02778)attP2   |
| 42552  | CG6506 | FBgn0030874 | CG6506 | P(TRIP.HMJ02125)attP40 |
| 41832  | CG6509 | FBgn0032363 | CG6509 | P(TRIP.GL01260)attP2   |
| 34343  | CG6512 | FBgn0036702 | CG6512 | P(TRIP.HMS01331)attP2  |
| 50994  | CG6527 | FBgn0036085 | CG6527 | P(TRIP.HMJ21107)attP40 |
| 44429  | CG6543 | FBgn0033879 | CG6543 | P(TRIP.GLC01380)attP2  |
| 31748  | CG6550 | FBgn0034214 | CG6550 | P(TRIP.HM04058)attP2   |
| 13631  | CG6567 | FBgn0037842 | CG6567 | P(TRIP.JF01417)attP2   |
| 50645  | CG6592 | FBgn0035669 | CG6592 | P(TRIP.HMC03045)attP2  |
| 31870  | CG6610 | FBgn0035675 | CG6610 | P(TRIP.HM05263)attP2   |
| 55950  | CG6628 | FBgn0036072 | CG6628 | P(TRIP.HMC04239)attP40 |
| 49368  | CG6628 | FBgn0036072 | CG6628 | VDRC.49368             |
| 55853  | CG6639 | FBgn0032638 | CG6639 | P(TRIP.HMC03740)attP40 |
| 55238  | CG6659 | FBgn0030946 | CG6659 | P(TRIP.GLC01856)attP2  |
| 51707  | CG6660 | FBgn0039030 | CG6660 | P(TRIP.HMC03202)attP2  |
| 30500  | CG6661 | FBgn0036403 | CG6661 | P(TRIP.HM05243)attP2   |
| 34727  | CG6662 | FBgn0035907 | CG6662 | P(TRIP.HMS01206)attP2  |
| 55643  | CG6664 | FBgn0036685 | CG6664 | P(TRIP.HMC03792)attP40 |
| 44586  | CG6672 | FBgn0037875 | CG6672 | P(TRIP.HMS02884)attP2  |
| 55233  | CG6674 | FBgn0036063 | CG6674 | P(TRIP.GLC01850)attP2  |
| 26233  | CG6683 | FBgn0035902 | CG6683 | P(TRIP.JF02131)attP2   |
| 31750  | CG6686 | FBgn0032388 | CG6686 | P(TRIP.HM04060)attP2   |
| 35021  | CG6688 | FBgn0039038 | CG6688 | P(TRIP.HMS01434)attP2  |
| 28364  | CG6690 | FBgn0038918 | CG6690 | P(TRIP.JF03000)attP2   |
| 43190  | CG6693 | FBgn0037878 | CG6693 | P(TRIP.GL01534)attP40  |
| 28751  | CG6697 | FBgn0027526 | CG6697 | P(TRIP.JF03179)attP2   |
| 35610  | CG6697 | FBgn0027526 | CG6697 | P(TRIP.GL00450)attP2   |
| 27560  | CG6701 | FBgn0033889 | CG6701 | P(TRIP.JF02714)attP2   |
| 28316  | CG6707 | FBgn0036058 | CG6707 | P(TRIP.JF02947)attP2   |
| 34927  | CG6709 | FBgn0036056 | CG6709 | P(TRIP.HMS01276)attP2  |
| 51400  | CG6712 | FBgn0032408 | CG6712 | P(TRIP.GLC01758)attP2  |
| 29425  | CG6723 | FBgn0037895 | CG6723 | P(TRIP.JF03361)attP2   |
| 34934  | CG6724 | FBgn0032298 | CG6724 | P(TRIP.HMS01284)attP2  |
| 38189  | CG6726 | FBgn0039049 | CG6726 | P(TRIP.GL01122)attP2   |
| 38381  | CG6733 | FBgn0039052 | CG6733 | P(TRIP.HMS01850)attP2  |
| 38366  | CG6738 | FBgn0039053 | CG6738 | P(TRIP.HMS01835)attP2  |
| 41825  | CG6745 | FBgn0035901 | CG6745 | P(TRIP.GL01253)attP2   |
| 50696  | CG6749 | FBgn0036040 | CG6749 | P(TRIP.HMC03098)attP2  |
| 41678  | CG6750 | FBgn0032292 | CG6750 | P(TRIP.HMS02242)attP2  |
| 31366  | CG6758 | FBgn0034704 | CG6758 | P(TRIP.JF01329)attP2   |
| 43662  | CG6762 | FBgn0030876 | CG6762 | P(TRIP.GL01499)attP2   |
| 51500  | CG6765 | FBgn0035903 | CG6765 | P(TRIP.HMC03258)attP2  |
| 42924  | CG6766 | FBgn0032398 | CG6766 | P(TRIP.HMS02617)attP40 |
| 35619  | CG6767 | FBgn0036030 | CG6767 | P(TRIP.GL00463)attP2   |
| 55236  | CG6769 | FBgn0030878 | CG6769 | P(TRIP.GLC01853)attP2  |
| 27561  | CG6770 | FBgn0032400 | CG6770 | P(TRIP.JF02715)attP2   |
| 35762  | CG6776 | FBgn0035904 | CG6776 | P(TRIP.HMS01510)attP40 |
| 55941  | CG6788 | FBgn0030880 | CG6788 | P(TRIP.HMC04229)attP40 |
| 42912  | CG6788 | FBgn0030880 | CG6788 | VDRC.42912             |
| 32395  | CG6791 | FBgn0037918 | CG6791 | P(TRIP.HMS00389)attP2  |
| 34615  | CG6805 | FBgn0034179 | CG6805 | P(TRIP.HMS01290)attP2  |

|       |        |             |        |                        |
|-------|--------|-------------|--------|------------------------|
| 31727 | CG6808 | FBgn0037921 | CG6808 | P(TRIP.HM04036)attP2   |
| 29369 | CG6813 | FBgn0037923 | CG6813 | P(TRIP.JF02533)attP2   |
| 31156 | CG6838 | FBgn0037182 | CG6838 | P(TRIP.JF01649)attP2   |
| 51909 | CG6841 | FBgn0036828 | CG6841 | P(TRIP.HMC03484)attP40 |
| 42908 | CG6847 | FBgn0030884 | CG6847 | P(TRIP.HMS02601)attP40 |
| 55349 | CG6865 | FBgn0036817 | CG6865 | P(TRIP.HMC04036)attP40 |
| 38226 | CG6873 | FBgn0030951 | CG6873 | P(TRIP.HMS01670)attP40 |
| 33423 | CG6903 | FBgn0029737 | CG6903 | P(TRIP.HMS00307)attP2  |
| 31067 | CG6905 | FBgn0035136 | CG6905 | P(TRIP.JF01517)attP2   |
| 27716 | CG6907 | FBgn0031711 | CG6907 | P(TRIP.JF02797)attP2   |
| 32336 | CG6914 | FBgn0037172 | CG6914 | P(TRIP.HMS00327)attP2  |
| 32448 | CG6923 | FBgn0037944 | CG6923 | P(TRIP.HMS00447)attP2  |
| 42001 | CG6927 | FBgn0029733 | CG6927 | P(TRIP.HMS02402)attP40 |
| 50552 | CG6928 | FBgn0036240 | CG6928 | P(TRIP.GLC01672)attP2  |
| 55973 | CG6933 | FBgn0036952 | CG6933 | P(TRIP.HMC04268)attP40 |
| 41824 | CG6937 | FBgn0038989 | CG6937 | P(TRIP.GL01252)attP2   |
| 51913 | CG6951 | FBgn0036959 | CG6951 | P(TRIP.HMS03371)attP40 |
| 51022 | CG6961 | FBgn0030959 | CG6961 | P(TRIP.HMJ21148)attP40 |
| 51682 | CG6962 | FBgn0037958 | CG6962 | P(TRIP.GLC01777)attP40 |
| 51409 | CG6966 | FBgn0038286 | CG6966 | P(TRIP.GLC01775)attP40 |
| 36618 | CG6967 | FBgn0034187 | CG6967 | P(TRIP.GL00578)attP2   |
| 31753 | CG6984 | FBgn0034191 | CG6984 | P(TRIP.HM04063)attP2   |
| 55972 | CG6996 | FBgn0036950 | CG6996 | P(TRIP.HMC04267)attP40 |
| 55157 | CG6999 | FBgn0030085 | CG6999 | P(TRIP.HMC03830)attP40 |
| 35285 | CG7028 | FBgn0027587 | CG7028 | P(TRIP.GL00186)attP2   |
| 34711 | CG7033 | FBgn0030086 | CG7033 | P(TRIP.HMS01190)attP2  |
| 27501 | CG7039 | FBgn0030088 | CG7039 | P(TRIP.JF02651)attP2   |
| 28656 | CG7045 | FBgn0038978 | CG7045 | P(TRIP.JF03071)attP2   |
| 28657 | CG7046 | FBgn0038979 | CG7046 | P(TRIP.JF03072)attP2   |
| 51896 | CG7049 | FBgn0035102 | CG7049 | P(TRIP.HMC03470)attP40 |
| 50559 | CG7049 | FBgn0035102 | CG7049 | P(TRIP.GLC01679)attP2  |
| 34360 | CG7053 | FBgn0030960 | CG7053 | P(TRIP.HMS01349)attP2  |
| 27815 | CG7053 | FBgn0030960 | CG7053 | VDRC.27815             |
| 32449 | CG7065 | FBgn0030091 | CG7065 | P(TRIP.HMS00448)attP2  |
| 42767 | CG7084 | FBgn0038938 | CG7084 | P(TRIP.GL00723)attP2   |
| 42653 | CG7094 | FBgn0032650 | CG7094 | P(TRIP.HMS02489)attP2  |
| 38939 | CG7102 | FBgn0031961 | CG7102 | P(TRIP.HMS01789)attP2  |
| 34976 | CG7112 | FBgn0035879 | CG7112 | P(TRIP.HMS01132)attP2  |
| 39065 | CG7115 | FBgn0027515 | CG7115 | P(TRIP.HMS01985)attP2  |
| 42820 | CG7133 | FBgn0037150 | CG7133 | P(TRIP.HMS02502)attP40 |
| 53924 | CG7137 | FBgn0034422 | CG7137 | P(TRIP.HMJ21269)attP40 |
| 44007 | CG7139 | FBgn0027532 | CG7139 | P(TRIP.HMS02721)attP40 |
| 50677 | CG7140 | FBgn0037147 | CG7140 | P(TRIP.HMC03078)attP2  |
| 52899 | CG7142 | FBgn0038595 | CG7142 | P(TRIP.HMC03638)attP40 |
| 42605 | CG7146 | FBgn0038593 | CG7146 | P(TRIP.HMS02438)attP40 |
| 46200 | CG7146 | FBgn0038593 | CG7146 | VDRC.46200             |
| 31358 | CG7148 | FBgn0046301 | CG7148 | P(TRIP.JF01316)attP2   |
| 39063 | CG7156 | FBgn0038588 | CG7156 | P(TRIP.HMS01983)attP40 |
| 35263 | CG7156 | FBgn0038588 | CG7156 | TRIP.GL00155)attP2     |
| 28533 | CG7158 | FBgn0037116 | CG7158 | P(TRIP.HM05019)attP2   |
| 35179 | CG7158 | FBgn0037116 | CG7158 | VDRC.35179             |
| 34804 | CG7185 | FBgn0035872 | CG7185 | P(TRIP.HMS00113)attP2  |
| 40838 | CG7192 | FBgn0030894 | CG7192 | P(TRIP.HMS02004)attP40 |
| 41855 | CG7194 | FBgn0035868 | CG7194 | P(TRIP.GL01283)attP2   |
| 29450 | CG7197 | FBgn0035866 | CG7197 | P(TRIP.JF03386)attP2   |
| 32485 | CG7200 | FBgn0032671 | CG7200 | P(TRIP.HMS00488)attP2  |
| 53895 | CG7202 | FBgn0037086 | CG7202 | P(TRIP.HMJ21214)attP40 |
| 42004 | CG7206 | FBgn0030892 | CG7206 | P(TRIP.HMS02405)attP40 |
| 51151 | CG7215 | FBgn0038571 | CG7215 | P(TRIP.GLC01376)attP2  |
| 43213 | CG7224 | FBgn0031971 | CG7224 | P(TRIP.GL01558)attP40  |
| 50613 | CG7227 | FBgn0031970 | CG7227 | P(TRIP.HMC02980)attP2  |
| 41922 | CG7229 | FBgn0034423 | CG7229 | P(TRIP.HMS02319)attP2  |
| 27505 | CG7236 | FBgn0031730 | CG7236 | P(TRIP.JF02655)attP2   |
| 44066 | CG7265 | FBgn0038272 | CG7265 | P(TRIP.HMS02783)attP40 |
| 43209 | CG7267 | FBgn0030079 | CG7267 | P(TRIP.GL01554)attP40  |
| 41822 | CG7271 | FBgn0036791 | CG7271 | P(TRIP.GL01250)attP2   |
| 41950 | CG7272 | FBgn0036501 | CG7272 | P(TRIP.HMS02347)attP40 |
| 55632 | CG7288 | FBgn0030969 | CG7288 | P(TRIP.HMC03779)attP40 |

|        |        |             |        |                          |
|--------|--------|-------------|--------|--------------------------|
| 28658  | CG7299 | FBgn0032282 | CG7299 | P{TRIP.JF03073}attP2     |
| 53927  | CG7300 | FBgn0032286 | CG7300 | P{TRIP.HMJ21272}attP40   |
| 44653  | CG7309 | FBgn0032314 | CG7309 | P{TRIP.HMC02417}attP2    |
| 32929  | CG7324 | FBgn0037074 | CG7324 | P{TRIP.HMS00722}attP2    |
| 35190  | CG7328 | FBgn0036942 | CG7328 | P{TRIP.GL00062}attP2     |
| 35620  | CG7330 | FBgn0036780 | CG7330 | P{TRIP.GL00464}attP2     |
| 53242  | CG7337 | FBgn0031374 | CG7337 | P{TRIP.GLC01394}attP2    |
| 32450  | CG7362 | FBgn0038258 | CG7362 | P{TRIP.HMS00449}attP2    |
| 31146  | CG7365 | FBgn0036939 | CG7365 | P{TRIP.JF01621}attP2     |
| 28063  | CG7369 | FBgn0037188 | CG7369 | P{TRIP.JF02900}attP2     |
| 38268  | CG7371 | FBgn0031710 | CG7371 | P{TRIP.HMS01713}attP40   |
| 42757  | CG7384 | FBgn0032262 | CG7384 | P{TRIP.GL00712}attP2     |
| 51433  | CG7409 | FBgn0035817 | CG7409 | P{TRIP.HMC03145}attP2    |
| 50649  | CG7414 | FBgn0037135 | CG7414 | P{TRIP.HMC03050}attP2    |
| 32510  | CG7420 | FBgn0031344 | CG7420 | P{TRIP.HMS00514}attP2    |
| 36608  | CG7433 | FBgn0036927 | CG7433 | P{TRIP.GL00568}attP2     |
| 35817  | CG7442 | FBgn0037140 | CG7442 | P{TRIP.GL00080}attP2     |
| 35319  | CG7448 | FBgn0037143 | CG7448 | P{TRIP.GL00225}attP2     |
| 28634  | CG7456 | FBgn0032258 | CG7456 | P{TRIP.JF03049}attP2     |
| 42827  | CG7460 | FBgn0036749 | CG7460 | P{TRIP.HMS02509}attP40   |
| 55347  | CG7461 | FBgn0034432 | CG7461 | P{TRIP.HMC04034}attP40   |
| 51911  | CG7470 | FBgn0037146 | CG7470 | P{TRIP.HMC03487}attP40   |
| 34035  | CG7497 | FBgn0036742 | CG7497 | P{TRIP.HMS01008}attP2    |
| 106421 | CG7497 | FBgn0036742 | CG7497 | VDRC.106421              |
| 34683  | CG7504 | FBgn0035842 | CG7504 | P{TRIP.HMS01161}attP2    |
| 53297  | CG7506 | FBgn0035805 | CG7506 | P{TRIP.HMC03513}attP40   |
| 51463  | CG7510 | FBgn0036741 | CG7510 | P{TRIP.HMC03201}attP2    |
| 31578  | CG7526 | FBgn0035798 | CG7526 | P{TRIP.JF01151}attP2     |
| 36909  | CG7530 | FBgn0038256 | CG7530 | P{TRIP.GL01117}attP2     |
| 51429  | CG7542 | FBgn0036738 | CG7542 | P{TRIP.HMC03048}attP2    |
| 32511  | CG7556 | FBgn0030990 | CG7556 | P{TRIP.HMS00515}attP2    |
| 55252  | CG7564 | FBgn0036734 | CG7564 | P{TRIP.HMC03939}attP40   |
| 38307  | CG7565 | FBgn0035833 | CG7565 | P{TRIP.HMS01770}attP40   |
| 51357  | CG7580 | FBgn0036728 | CG7580 | P{TRIP.HMC03242}attP2    |
| 53002  | CG7582 | FBgn0039681 | CG7582 | P{TRIP.HMJ21718}attP40   |
| 27090  | CG7589 | FBgn0036727 | CG7589 | P{TRIP.JF02437}attP2     |
| 55660  | CG7598 | FBgn0039689 | CG7598 | P{TRIP.HMC03815}attP40   |
| 51006  | CG7603 | FBgn0036726 | CG7603 | P{TRIP.HMJ21121}attP40   |
| 35191  | CG7616 | FBgn0036142 | CG7616 | P{TRIP.GL00063}attP2     |
| 32337  | CG7627 | FBgn0032026 | CG7627 | P{TRIP.HMS00328}attP2    |
| 55194  | CG7637 | FBgn0033548 | CG7637 | P{TRIP.HMC03890}attP40   |
| 32338  | CG7692 | FBgn0036714 | CG7692 | P{TRIP.HMS00329}attP2    |
| 44568  | CG7695 | FBgn0038631 | CG7695 | P{TRIP.HMS02864}attP40   |
| 31367  | CG7707 | FBgn0036703 | CG7707 | P{TRIP.JF01330}attP2     |
| 28613  | CG7708 | FBgn0038641 | CG7708 | P{TRIP.JF03028}attP2     |
| 42837  | CG7715 | FBgn0038646 | CG7715 | P{TRIP.HMS02529}attP40   |
| 36851  | CG7730 | FBgn0036689 | CG7730 | P{TRIP.GL01109}attP2     |
| 11623  | CG7730 | FBgn0036689 | CG7730 | VDRC.11623               |
| 51886  | CG7735 | FBgn0034446 | CG7735 | P{TRIP.HMC03460}attP40   |
| 36904  | CG7737 | FBgn0033584 | CG7737 | P{TRIP.GL01104}attP2     |
| 26234  | CG7745 | FBgn0033616 | CG7745 | P{TRIP.JF02132}attP2     |
| 27717  | CG7757 | FBgn0036915 | CG7757 | P{TRIP.JF02798}attP2     |
| 54811  | CG7759 | FBgn0033633 | CG7759 | P{TRIP.HMJ21530}attP40   |
| 42510  | CG7766 | FBgn0030087 | CG7766 | P{TRIP.HMJ02075}attP40   |
| 50695  | CG7777 | FBgn0033635 | CG7777 | P{TRIP.HMC03097}attP40   |
| 32843  | CG7787 | FBgn0032020 | CG7787 | P{TRIP.HMS00625}attP2    |
| 51028  | CG7789 | FBgn0039698 | CG7789 | P{TRIP.HMJ21155}attP40   |
| 41970  | CG7794 | FBgn0038565 | CG7794 | P{TRIP.HMS02367}attP2    |
| 28922  | CG7800 | FBgn0037552 | CG7800 | P{TRIP.HMS05133}attP2    |
| 27121  | CG7800 | FBgn0037552 | CG7800 | VDRC.27121               |
| 42579  | CG7804 | FBgn0036496 | CG7804 | P{TRIP.HMS01884}attP2    |
| 38355  | CG7804 | FBgn0036496 | CG7804 | P{TRIP.HMS01823}attP40/C |
| 38997  | CG7806 | FBgn0032018 | CG7806 | P{TRIP.HMS01913}attP2    |
| 2804   | CG7806 | FBgn0032018 | CG7806 | VDRC.2804                |
| 50635  | CG7816 | FBgn0039714 | CG7816 | P{TRIP.HMC03033}attP2    |
| 44112  | CG7829 | FBgn0039703 | CG7829 | P{TRIP.HMS02834}attP40   |
| 34638  | CG7830 | FBgn0032015 | CG7830 | P{TRIP.HMS01113}attP2    |
| 51464  | CG7834 | FBgn0039697 | CG7834 | P{TRIP.HMC03204}attP2    |

|       |        |             |        |                        |
|-------|--------|-------------|--------|------------------------|
| 25992 | CG7839 | FBgn0036124 | CG7839 | P(TRIP.JF02014)attP2   |
| 34954 | CG7840 | FBgn0032014 | CG7840 | P(TRIP.HMS00426)attP2  |
| 28752 | CG7841 | FBgn0036502 | CG7841 | P(TRIP.JF03180)attP2   |
| 35229 | CG7878 | FBgn0037549 | CG7878 | P(TRIP.GL00113)attP2   |
| 44505 | CG7881 | FBgn0033048 | CG7881 | P(TRIP.HMC02891)attP2  |
| 43238 | CG7889 | FBgn0031003 | CG7889 | P(TRIP.GLC01425)attP2  |
| 28565 | CG7896 | FBgn0039728 | CG7896 | P(TRIP.HM05051)attP2   |
| 55651 | CG7903 | FBgn0039730 | CG7903 | P(TRIP.HMC03800)attP40 |
| 30519 | CG7906 | FBgn0036417 | CG7906 | P(TRIP.JF03395)attP2   |
| 55370 | CG7907 | FBgn0038887 | CG7907 | P(TRIP.HMC04058)attP40 |
| 51702 | CG7910 | FBgn0037547 | CG7910 | P(TRIP.HMC03182)attP2  |
| 35593 | CG7911 | FBgn0039735 | CG7911 | P(TRIP.GL00430)attP2   |
| 51021 | CG7911 | FBgn0039735 | CG7911 | P(TRIP.HMJ21147)attP40 |
| 33889 | CG7922 | FBgn0038889 | CG7922 | P(TRIP.HMS00827)attP2  |
| 28779 | CG7945 | FBgn0036505 | CG7945 | P(TRIP.JF03207)attP2   |
| 55274 | CG7946 | FBgn0039743 | CG7946 | P(TRIP.HMC03961)attP40 |
| 35298 | CG7946 | FBgn0039743 | CG7946 | VDRC.35298             |
| 52936 | CG7971 | FBgn0035253 | CG7971 | P(TRIP.HMC03678)attP40 |
| 50596 | CG7974 | FBgn0035254 | CG7974 | P(TRIP.GLC01718)attP2  |
| 42935 | CG7993 | FBgn0038585 | CG7993 | P(TRIP.HMS02628)attP40 |
| 53021 | CG8001 | FBgn0035268 | CG8001 | P(TRIP.HMJ21744)attP40 |
| 40921 | CG8005 | FBgn0035854 | CG8005 | P(TRIP.HMS02169)attP2  |
| 32339 | CG8021 | FBgn0037602 | CG8021 | P(TRIP.HMS00330)attP2  |
| 32340 | CG8034 | FBgn0031011 | CG8034 | P(TRIP.HMS00331)attP2  |
| 32884 | CG8036 | FBgn0037607 | CG8036 | P(TRIP.HMS00672)attP2  |
| 41604 | CG8042 | FBgn0027554 | CG8042 | P(TRIP.GL01144)attP2   |
| 31240 | CG8067 | FBgn0033891 | CG8067 | P(TRIP.JF01749)attP2   |
| 55968 | CG8072 | FBgn0036070 | CG8072 | P(TRIP.HMC04263)attP40 |
| 55654 | CG8079 | FBgn0034002 | CG8079 | P(TRIP.HMC03804)attP40 |
| 42507 | CG8090 | FBgn0033995 | CG8090 | P(TRIP.HMJ02072)attP40 |
| 32930 | CG8108 | FBgn0027567 | CG8108 | P(TRIP.HMS00723)attP2  |
| 36837 | CG8116 | FBgn0037614 | CG8116 | P(TRIP.GL01078)attP2   |
| 33012 | CG8128 | FBgn0030668 | CG8128 | P(TRIP.HMS00812)attP2  |
| 40918 | CG8136 | FBgn0037616 | CG8136 | P(TRIP.HMS02166)attP2  |
| 23748 | CG8136 | FBgn0037616 | CG8136 | VDRC.23748             |
| 42489 | CG8142 | FBgn0030871 | CG8142 | P(TRIP.HMJ02051)attP40 |
| 43551 | CG8145 | FBgn0037617 | CG8145 | P(TRIP.GL00720)attP2   |
| 43314 | CG8147 | FBgn0043791 | CG8147 | P(TRIP.HMS02698)attP2  |
| 43149 | CG8149 | FBgn0037700 | CG8149 | P(TRIP.GL01490)attP2   |
| 55608 | CG8172 | FBgn0033362 | CG8172 | P(TRIP.HMC03746)attP40 |
| 31586 | CG8173 | FBgn0030864 | CG8173 | P(TRIP.JF01161)attP2   |
| 51827 | CG8177 | FBgn0036043 | CG8177 | P(TRIP.HMC03399)attP40 |
| 36715 | CG8184 | FBgn0030674 | CG8184 | P(TRIP.HMS01605)attP40 |
| 43271 | CG8191 | FBgn0030675 | CG8191 | P(TRIP.GLC01460)attP2  |
| 44447 | CG8195 | FBgn0034032 | CG8195 | P(TRIP.GLC01596)attP2  |
| 41601 | CG8204 | FBgn0034033 | CG8204 | P(TRIP.GL01141)attP2   |
| 44641 | CG8206 | FBgn0030679 | CG8206 | P(TRIP.GLC01615)attP2  |
| 41821 | CG8209 | FBgn0035830 | CG8209 | P(TRIP.GL01249)attP2   |
| 27069 | CG8216 | FBgn0033358 | CG8216 | P(TRIP.JF02414)attP2   |
| 51874 | CG8235 | FBgn0033351 | CG8235 | P(TRIP.HMC03448)attP40 |
| 33927 | CG8243 | FBgn0033349 | CG8243 | P(TRIP.HMS00876)attP2  |
| 29426 | CG8245 | FBgn0033031 | CG8245 | P(TRIP.JF03362)attP2   |
| 31361 | CG8272 | FBgn0033337 | CG8272 | P(TRIP.JF01321)attP2   |
| 34805 | CG8273 | FBgn0037716 | CG8273 | P(TRIP.HMS00114)attP2  |
| 33361 | CG8289 | FBgn0030854 | CG8289 | P(TRIP.HMS00233)attP2  |
| 27065 | CG8290 | FBgn0026573 | CG8290 | P(TRIP.JF02410)attP2   |
| 43251 | CG8297 | FBgn0034050 | CG8297 | P(TRIP.GLC01440)attP2  |
| 43242 | CG8300 | FBgn0029937 | CG8300 | P(TRIP.GLC01429)attP2  |
| 51698 | CG8329 | FBgn0036022 | CG8329 | P(TRIP.HMC03146)attP2  |
| 42659 | CG8343 | FBgn0040502 | CG8343 | P(TRIP.HMS02495)attP2  |
| 51914 | CG8349 | FBgn0032003 | CG8349 | P(TRIP.HMS03372)attP40 |
| 51915 | CG8353 | FBgn0032002 | CG8353 | P(TRIP.HMS03373)attP40 |
| 27066 | CG8359 | FBgn0037634 | CG8359 | P(TRIP.JF02411)attP2   |
| 51916 | CG8360 | FBgn0032001 | CG8360 | P(TRIP.HMS03374)attP40 |
| 42635 | CG8368 | FBgn0035707 | CG8368 | P(TRIP.HMS02471)attP40 |
| 33877 | CG8397 | FBgn0034066 | CG8397 | P(TRIP.HMS00814)attP2  |
| 42910 | CG8399 | FBgn0034067 | CG8399 | P(TRIP.HMS02603)attP40 |
| 34680 | CG8412 | FBgn0037743 | CG8412 | P(TRIP.HMS01158)attP2  |

|        |        |             |        |                        |
|--------|--------|-------------|--------|------------------------|
| 44435  | CG8414 | FBgn0034073 | CG8414 | P{TRIP.GLC01391}attP2  |
| 34379  | CG8417 | FBgn0037744 | CG8417 | P{TRIP.HMS01369}attP2  |
| 34904  | CG8475 | FBgn0031995 | CG8475 | P{TRIP.HMS01249}attP2  |
| 2800   | CG8475 | FBgn0031995 | CG8475 | VDRC.2800              |
| 39033  | CG8478 | FBgn0037746 | CG8478 | P{TRIP.HMS01952}attP2  |
| 43260  | CG8490 | FBgn0033715 | CG8490 | P{TRIP.GLC01449}attP2  |
| 51010  | CG8501 | FBgn0033724 | CG8501 | P{TRIP.HMJ21126}attP40 |
| 44533  | CG8520 | FBgn0033734 | CG8520 | P{TRIP.HMC02927}attP40 |
| 25825  | CG8546 | FBgn0035785 | CG8546 | P{TRIP.JF01843}attP2   |
| 44638  | CG8552 | FBgn0031990 | CG8552 | P{TRIP.GLC01601}attP2  |
| 50528  | CG8569 | FBgn0033752 | CG8569 | P{TRIP.GLC01646}attP2  |
| 42638  | CG8620 | FBgn0040837 | CG8620 | P{TRIP.HMS02474}attP40 |
| 31933  | CG8632 | FBgn0033762 | CG8632 | P{TRIP.JF02224}attP2   |
| 43243  | CG8636 | FBgn0029629 | CG8636 | P{TRIP.GLC01430}attP2  |
| 41965  | CG8671 | FBgn0032938 | CG8671 | P{TRIP.HMS02362}attP2  |
| 105728 | CG8671 | FBgn0032938 | CG8671 | VDRC.105728            |
| 34715  | CG8678 | FBgn0032935 | CG8678 | P{TRIP.HMS01194}attP2  |
| 36001  | CG8678 | FBgn0032935 | CG8678 | VDRC.36001             |
| 38348  | CG8679 | FBgn0032934 | CG8679 | P{TRIP.HMS01816}attP40 |
| 30778  | CG8679 | FBgn0032934 | CG8679 | VDRC.30778             |
| 28576  | CG8680 | FBgn0031684 | CG8680 | P{TRIP.HM05062}attP2   |
| 51860  | CG8680 | FBgn0031684 | CG8680 | HMC03434}attP40        |
| 25853  | CG8713 | FBgn0033257 | CG8713 | P{TRIP.JF01874}attP2   |
| 34074  | CG8728 | FBgn0033235 | CG8728 | P{TRIP.HMS00561}attP2  |
| 50998  | CG8735 | FBgn0033309 | CG8735 | P{TRIP.HMJ21111}attP40 |
| 44567  | CG8746 | FBgn0033330 | CG8746 | P{TRIP.HMS02863}attP40 |
| 32343  | CG8765 | FBgn0036900 | CG8765 | P{TRIP.HMS00334}attP2  |
| 29447  | CG8765 | FBgn0036900 | CG8765 | P{TRIP.JF03383}attP2   |
| 36793  | CG8778 | FBgn0033761 | CG8778 | P{TRIP.GLC00533}attP2  |
| 23621  | CG8778 | FBgn0033761 | CG8778 | VDRC.23621             |
| 29624  | CG8784 | FBgn0038140 | CG8784 | P{TRIP.JF03303}attP2   |
| 40882  | CG8786 | FBgn0036897 | CG8786 | P{TRIP.HMS02130}attP2  |
| 34728  | CG8791 | FBgn0033234 | CG8791 | P{TRIP.HMS01207}attP2  |
| 28781  | CG8795 | FBgn0038139 | CG8795 | P{TRIP.JF03209}attP2   |
| 31117  | CG8801 | FBgn0028473 | CG8801 | P{TRIP.JF01590}attP2   |
| 42010  | CG8834 | FBgn0033733 | CG8834 | P{TRIP.HMS02411}attP40 |
| 29515  | CG8852 | FBgn0031548 | CG8852 | P{TRIP.HM05192}attP2   |
| 34975  | CG8858 | FBgn0033698 | CG8858 | P{TRIP.HMS01128}attP2  |
| 29427  | CG8861 | FBgn0037676 | CG8861 | P{TRIP.JF03363}attP2   |
| 42483  | CG8878 | FBgn0027504 | CG8878 | P{TRIP.GLC01342}attP2  |
| 57573  | CG8878 | FBgn0027504 | CG8878 | P{TRIP.HMC04523}attP40 |
| 51859  | CG8891 | FBgn0031663 | CG8891 | P{TRIP.HMC03433}attP40 |
| 28636  | CG8907 | FBgn0038466 | CG8907 | P{TRIP.JF03051}attP2   |
| 31155  | CG8909 | FBgn0030706 | CG8909 | P{TRIP.JF01632}attP2   |
| 32908  | CG8915 | FBgn0030833 | CG8915 | P{TRIP.HMS00697}attP2  |
| 39031  | CG8916 | FBgn0030707 | CG8916 | P{TRIP.HMS01950}attP40 |
| 25854  | CG8916 | FBgn0030707 | CG8916 | P{TRIP.JF01875}attP2   |
| 34738  | CG8920 | FBgn0027529 | CG8920 | P{TRIP.HMS01218}attP2  |
| 42491  | CG8924 | FBgn0030710 | CG8924 | P{TRIP.HMJ02055}attP40 |
| 41910  | CG8929 | FBgn0034504 | CG8929 | P{TRIP.HMS02303}attP2  |
| 31925  | CG8944 | FBgn0030680 | CG8944 | P{TRIP.JF02215}attP2   |
| 50897  | CG8950 | FBgn0034186 | CG8950 | P{TRIP.HMC02421}attP2  |
| 31756  | CG8963 | FBgn0034181 | CG8963 | P{TRIP.HM04067}attP2   |
| 38973  | CG8964 | FBgn0033674 | CG8964 | P{TRIP.HMS01889}attP2  |
| 55892  | CG8964 | FBgn0033674 | CG8964 | P{TRIP.HMC04171}attP2  |
| 34973  | CG8993 | FBgn0035334 | CG8993 | P{TRIP.HMS01042}attP2  |
| 41126  | CG8993 | FBgn0035334 | CG8993 | VDRC.41126             |
| 31362  | CG9003 | FBgn0033639 | CG9003 | P{TRIP.JF01322}attP2   |
| 33362  | CG9005 | FBgn0033638 | CG9005 | P{TRIP.HMS00234}attP2  |
| 51447  | CG9007 | FBgn0036398 | CG9007 | P{TRIP.HMC03177}attP2  |
| 42603  | CG9018 | FBgn0035318 | CG9018 | P{TRIP.HMS02436}attP40 |
| 42593  | CG9029 | FBgn0031746 | CG9029 | P{TRIP.HMS02425}attP40 |
| 42845  | CG9034 | FBgn0040931 | CG9034 | P{TRIP.HMS02537}attP40 |
| 42595  | CG9065 | FBgn0030610 | CG9065 | P{TRIP.HMS02427}attP40 |
| 35791  | CG9083 | FBgn0035077 | CG9083 | P{TRIP.HMS01505}attP2  |
| 31374  | CG9086 | FBgn0030809 | CG9086 | P{TRIP.JF01341}attP2   |
| 44495  | CG9090 | FBgn0034497 | CG9090 | P{TRIP.HMC02425}attP2  |
| 43547  | CG9107 | FBgn0031764 | CG9107 | P{TRIP.HMS02555}attP40 |

|        |        |             |        |                        |
|--------|--------|-------------|--------|------------------------|
| 31238  | CG9135 | FBgn0031769 | CG9135 | P(TRIP.JF01746)attP2   |
| 36701  | CG9140 | FBgn0031771 | CG9140 | P(TRIP.HMS01590)attP2  |
| 42899  | CG9164 | FBgn0030634 | CG9164 | P(TRIP.HMS02592)attP40 |
| 37518  | CG9186 | FBgn0035206 | CG9186 | P(TRIP.HMS01660)attP40 |
| 25921  | CG9194 | FBgn0035192 | CG9194 | P(TRIP.JF01941)attP2   |
| 44448  | CG9203 | FBgn0030646 | CG9203 | P(TRIP.GLC01597)attP2  |
| 42588  | CG9205 | FBgn0035181 | CG9205 | P(TRIP.HMS02420)attP40 |
| 29079  | CG9205 | FBgn0035181 | CG9205 | VDRC.29079             |
| 51787  | CG9220 | FBgn0030662 | CG9220 | P(TRIP.HMC03343)attP40 |
| 38532  | CG9236 | FBgn0034558 | CG9236 | P(TRIP.HMS01745)attP2  |
| 42498  | CG9238 | FBgn0036428 | CG9238 | P(TRIP.HMJ02062)attP40 |
| 50907  | CG9246 | FBgn0032925 | CG9246 | P(TRIP.HMJ03129)attP40 |
| 31122  | CG9248 | FBgn0032923 | CG9248 | P(TRIP.JF01595)attP2   |
| 36589  | CG9253 | FBgn0032919 | CG9253 | P(TRIP.GL00549)attP2   |
| 42582  | CG9257 | FBgn0032916 | CG9257 | P(TRIP.HMS02123)attP40 |
| 34800  | CG9267 | FBgn0032524 | CG9267 | P(TRIP.HMS00109)attP2  |
| 34029  | CG9270 | FBgn0032908 | CG9270 | P(TRIP.HMS00999)attP2  |
| 50914  | CG9279 | FBgn0036882 | CG9279 | P(TRIP.HMJ21003)attP40 |
| 50595  | CG9302 | FBgn0032514 | CG9302 | P(TRIP.GLC01717)attP2  |
| 42544  | CG9304 | FBgn0034674 | CG9304 | P(TRIP.HMJ02115)attP40 |
| 51888  | CG9313 | FBgn0034566 | CG9313 | P(TRIP.HMC03462)attP40 |
| 31485  | CG9316 | FBgn0032878 | CG9316 | P(TRIP.JF01327)attP2   |
| 31988  | CG9336 | FBgn0032897 | CG9336 | P(TRIP.JF03422)attP2   |
| 29532  | CG9344 | FBgn0034564 | CG9344 | P(TRIP.HM05211)attP2   |
| 28292  | CG9368 | FBgn0036890 | CG9368 | P(TRIP.JF02922)attP2   |
| 51821  | CG9384 | FBgn0036446 | CG9384 | P(TRIP.HMC03393)attP2  |
| 33364  | CG9386 | FBgn0037708 | CG9386 | P(TRIP.HMS00236)attP2  |
| 28320  | CG9411 | FBgn0030569 | CG9411 | P(TRIP.JF02952)attP2   |
| 51791  | CG9413 | FBgn0030574 | CG9413 | P(TRIP.HMC03347)attP2  |
| 42542  | CG9418 | FBgn0026582 | CG9418 | P(TRIP.HMJ02112)attP40 |
| 41679  | CG9422 | FBgn0033092 | CG9422 | P(TRIP.HMS02243)attP2  |
| 34099  | CG9425 | FBgn0036451 | CG9425 | P(TRIP.HMS01002)attP2  |
| 106833 | CG9425 | FBgn0036451 | CG9425 | VDRC.106833            |
| 31121  | CG9426 | FBgn0032485 | CG9426 | P(TRIP.JF01594)attP2   |
| 38946  | CG9426 | FBgn0032485 | CG9426 | P(TRIP.HMS01860)attP2  |
| 26754  | CG9437 | FBgn0034599 | CG9437 | P(TRIP.JF02318)attP2   |
| 34545  | CG9451 | FBgn0036876 | CG9451 | P(TRIP.HMS01016)attP2  |
| 51757  | CG9458 | FBgn0037765 | CG9458 | P(TRIP.HMC03309)attP2  |
| 50647  | CG9459 | FBgn0037764 | CG9459 | P(TRIP.HMC03047)attP2  |
| 26724  | CG9467 | FBgn0037758 | CG9467 | P(TRIP.JF02266)attP2   |
| 34333  | CG9485 | FBgn0034618 | CG9485 | P(TRIP.HMS01321)attP2  |
| 51725  | CG9492 | FBgn0037726 | CG9492 | P(TRIP.HMC03269)attP2  |
| 50965  | CG9503 | FBgn0030598 | CG9503 | P(TRIP.HMJ21069)attP40 |
| 44436  | CG9531 | FBgn0031817 | CG9531 | P(TRIP.GLC01392)attP2  |
| 44556  | CG9547 | FBgn0031824 | CG9547 | P(TRIP.HMS02852)attP40 |
| 32344  | CG9548 | FBgn0031822 | CG9548 | P(TRIP.HMS00335)attP2  |
| 51025  | CG9568 | FBgn0032087 | CG9568 | P(TRIP.HMJ21151)attP40 |
| 42761  | CG9578 | FBgn0031094 | CG9578 | P(TRIP.GL00716)attP2   |
| 34547  | CG9581 | FBgn0031093 | CG9581 | P(TRIP.HMS01018)attP2  |
| 28527  | CG9588 | FBgn0038166 | CG9588 | P(TRIP.HM05013)attP2   |
| 39003  | CG9601 | FBgn0037578 | CG9601 | P(TRIP.HMS01919)attP2  |
| 34030  | CG9609 | FBgn0030787 | CG9609 | P(TRIP.HMS01000)attP2  |
| 28070  | CG9636 | FBgn0037556 | CG9636 | P(TRIP.JF02907)attP2   |
| 44110  | CG9643 | FBgn0031485 | CG9643 | P(TRIP.HMS02831)attP40 |
| 34819  | CG9646 | FBgn0034184 | CG9646 | P(TRIP.HMS00134)attP2  |
| 14982  | CG9646 | FBgn0034184 | CG9646 | VDRC.14982             |
| 40852  | CG9650 | FBgn0029939 | CG9650 | P(TRIP.HMS02019)attP40 |
| 28384  | CG9657 | FBgn0029950 | CG9657 | P(TRIP.JF03021)attP2   |
| 51416  | CG9666 | FBgn0036856 | CG9666 | P(TRIP.GLC01794)attP2  |
| 31758  | CG9667 | FBgn0037550 | CG9667 | P(TRIP.HM04069)attP2   |
| 51733  | CG9701 | FBgn0036659 | CG9701 | P(TRIP.HMC03293)attP40 |
| 31901  | CG9705 | FBgn0036661 | CG9705 | P(TRIP.JF02190)attP2   |
| 51908  | CG9706 | FBgn0036662 | CG9706 | P(TRIP.HMC03483)attP40 |
| 49346  | CG9706 | FBgn0036662 | CG9706 | VDRC.49346             |
| 28052  | CG9722 | FBgn0038209 | CG9722 | P(TRIP.JF02887)attP2   |
| 42495  | CG9727 | FBgn0037445 | CG9727 | P(TRIP.HMJ02059)attP40 |
| 36675  | CG9743 | FBgn0039756 | CG9743 | P(TRIP.HMS01563)attP2  |
| 33980  | CG9769 | FBgn0037270 | CG9769 | P(TRIP.HMS00940)attP2  |

|        |             |             |         |                        |
|--------|-------------|-------------|---------|------------------------|
| 34807  | CG9772      | FBgn0037236 | CG9772  | P(TRIP.HMS00116)attP2  |
| 34570  | CG9773      | FBgn0037609 | CG9773  | P(TRIP.HMS01044)attP2  |
| 100013 | CG9773      | FBgn0037609 | CG9773  | VDRC.100013            |
| 32396  | CG9775      | FBgn0037261 | CG9775  | P(TRIP.HMS00390)attP2  |
| 34723  | CG9784      | FBgn0030761 | CG9784  | P(TRIP.HMS01202)attP2  |
| 41937  | CG9797      | FBgn0037621 | CG9797  | P(TRIP.HMS02334)attP40 |
| 41994  | CG9806      | FBgn0030222 | CG9806  | P(TRIP.HMS02395)attP40 |
| 43171  | CG9821      | FBgn0037636 | CG9821  | P(TRIP.GL01513)attP2   |
| 50639  | CG9825      | FBgn0034783 | CG9825  | P(TRIP.HMC03039)attP2  |
| 51728  | CG9826      | FBgn0034784 | CG9826  | P(TRIP.HMC03274)attP2  |
| 50564  | CG9850      | FBgn0034903 | CG9850  | P(TRIP.GL01684)attP2   |
| 38321  | CG9865      | FBgn0034649 | CG9865  | P(TRIP.HMS01785)attP2  |
| 50655  | CG9876      | FBgn0034821 | CG9876  | P(TRIP.HMC03056)attP2  |
| 51857  | CG9886      | FBgn0031428 | CG9886  | P(TRIP.HMC03431)attP40 |
| 42587  | CG9896      | FBgn0034808 | CG9896  | P(TRIP.HMS02419)attP40 |
| 35699  | CG9896      | FBgn0034808 | CG9896  | VDRC.35699             |
| 51401  | CG9897      | FBgn0034807 | CG9897  | P(TRIP.GL01760)attP2   |
| 29606  | CG9911      | FBgn0030734 | CG9911  | P(TRIP.JF03285)attP2   |
| 44657  | CG9920      | FBgn0038200 | CG9920  | P(TRIP.HMC02438)attP2  |
| 35811  | CG9925      | FBgn0038191 | CG9925  | P(TRIP.HMS01514)attP2  |
| 29328  | CG9925      | FBgn0038191 | CG9925  | VDRC.29328             |
| 27540  | CG9934      | FBgn0032467 | CG9934  | P(TRIP.JF02691)attP2   |
| 28506  | CG9935      | FBgn0039916 | CG9935  | P(TRIP.JF03126)attP2   |
| 43234  | CG9941      | FBgn0030514 | CG9941  | P(TRIP.GL01421)attP2   |
| 33959  | CG9961      | FBgn0031451 | CG9961  | P(TRIP.HMS00916)attP2  |
| 28523  | CG9977      | FBgn0035371 | CG9977  | P(TRIP.HMS00509)attP2  |
| 57869  | CG9977      | FBgn0035371 | CG9977  | P(TRIP.HMC04803)attP40 |
| 25856  | Cha         | FBgn0000303 | CG12345 | P(TRIP.JF01877)attP2   |
| 34669  | chb         | FBgn0021760 | CG32435 | P(TRIP.HMS01146)attP2  |
| 34742  | Chc         | FBgn0000319 | CG9012  | P(TRIP.HMS01222)attP2  |
| 34665  | Chd1        | FBgn0250786 | CG3733  | P(TRIP.HMS01142)attP2  |
| 33420  | Chd3        | FBgn0023395 | CG9594  | P(TRIP.HMS00302)attP2  |
| 50978  | CheA29a     | FBgn0053194 | CG33194 | P(TRIP.HMJ21084)attP40 |
| 51001  | CheA86a     | FBgn0261291 | CG33698 | P(TRIP.HMJ21115)attP40 |
| 28348  | CheB38a     | FBgn0067312 | CG33320 | P(TRIP.JF02984)attP2   |
| 28014  | CheB38b     | FBgn0067311 | CG33321 | P(TRIP.JF02848)attP2   |
| 55945  | CheB38c     | FBgn0032888 | CG14405 | P(TRIP.HMC04233)attP40 |
| 34078  | CheB42a     | FBgn0053348 | CG33348 | P(TRIP.HMS00590)attP2  |
| 27255  | CheB42b     | FBgn0066293 | CG33351 | P(TRIP.JF02563)attP2   |
| 27089  | CheB42c     | FBgn0066292 | CG33350 | P(TRIP.JF02435)attP2   |
| 53911  | CheB93b     | FBgn0051438 | CG31438 | P(TRIP.HMJ21244)attP40 |
| 57393  | CheB93b     | FBgn0051438 | CG31438 | P(TRIP.HMC04697)attP40 |
| 35755  | cher        | FBgn0014141 | CG3937  | P(TRIP.HMS01501)attP2  |
| 34928  | CHES-1-like | FBgn0029504 | CG12690 | P(TRIP.HMS01277)attP2  |
| 31049  | Chi         | FBgn0013764 | CG3924  | P(TRIP.JF01497)attP2   |
| 34523  | chic        | FBgn0000308 | CG9553  | P(TRIP.HMS00550)attP2  |
| 36665  | chico       | FBgn0024248 | CG5686  | P(TRIP.HMS01553)attP2  |
| 33365  | chif        | FBgn0000307 | CG5813  | P(TRIP.HMS00237)attP2  |
| 33638  | chinmo      | FBgn0086758 | CG31666 | P(TRIP.HMS00036)attP2  |
| 34017  | CHIP        | FBgn0027052 | CG5203  | P(TRIP.HMS00986)attP2  |
| 42843  | CHKov2      | FBgn0039328 | CG10675 | P(TRIP.HMS02535)attP40 |
| 55944  | ChLD3       | FBgn0032598 | CG17905 | P(TRIP.HMC04232)attP40 |
| 32484  | chm         | FBgn0028387 | CG5229  | P(TRIP.HMS00487)attP2  |
| 33928  | Chmp1       | FBgn0036805 | CG4108  | P(TRIP.HMS00877)attP2  |
| 38375  | CHMP2B      | FBgn0035589 | CG4618  | P(TRIP.HMS01844)attP40 |
| 28531  | CHMP2B      | FBgn0035589 | CG4618  | P(TRIP.HMS05017)attP2  |
| 26779  | chn         | FBgn0015371 | CG11798 | P(TRIP.JF02343)attP2   |
| 31655  | chp         | FBgn0267435 | CG1744  | P(TRIP.JF01447)attP2   |
| 31052  | Chrac-14    | FBgn0043002 | CG13399 | P(TRIP.JF01500)attP2   |
| 51155  | Chrac-16    | FBgn0043001 | CG15736 | P(TRIP.HMC02362)attP2  |
| 43975  | chrb        | FBgn0036165 | CG7533  | P(TRIP.GL01585)attP2   |
| 36084  | Chro        | FBgn0044324 | CG10712 | P(TRIP.GL00503)attP2   |
| 28033  | chrw        | FBgn0015372 | CG3870  | P(TRIP.JF02868)attP2   |
| 42927  | Cht11       | FBgn0029913 | CG3044  | P(TRIP.HMS02620)attP40 |
| 55989  | Cht12       | FBgn0050293 | CG30293 | P(TRIP.HMC04285)attP40 |
| 35717  | Cht2        | FBgn0022702 | CG2054  | P(TRIP.GLV21082)attP2  |
| 54823  | Cht6        | FBgn0263132 | CG43374 | P(TRIP.HMJ21542)attP40 |
| 28984  | ci          | FBgn0004859 | CG2125  | P(TRIP.JF01715)attP2   |

|       |            |             |         |                        |
|-------|------------|-------------|---------|------------------------|
| 44644 | CIAPIN1    | FBgn0001977 | CG4180  | P{TRIP.HMC02348}attP2  |
| 28003 | cib        | FBgn0026084 | CG4944  | P{TRIP.JF02837}attP2   |
| 25995 | cic        | FBgn0262582 | CG43122 | P{TRIP.JF02017}attP2   |
| 40912 | cid        | FBgn0040477 | CG13329 | P{TRIP.HMS02160}attP2  |
| 32425 | cin        | FBgn0000316 | CG2945  | P{TRIP.HMS00420}attP2  |
| 38976 | cindr      | FBgn0027598 | CG31012 | P{TRIP.HMS01892}attP40 |
| 50599 | Cip4       | FBgn0035533 | CG15015 | P{TRIP.GLC01721}attP2  |
| 34821 | Cir1       | FBgn0033313 | CG8639  | P{TRIP.HMS00136}attP2  |
| 41690 | ck         | FBgn0000317 | CG7595  | P{TRIP.HMS02254}attP2  |
| 34522 | Cka        | FBgn0044323 | CG7392  | P{TRIP.HMS00081}attP2  |
| 55967 | ckd        | FBgn0035427 | CG14959 | P{TRIP.HMC04262}attP40 |
| 41711 | Cklalpha   | FBgn0015024 | CG2028  | P{TRIP.HMS02276}attP40 |
| 31645 | Cklalpha   | FBgn0264492 | CG17520 | P{TRIP.JF01436}attP2   |
| 53025 | Cklalpha-1 | FBgn0015025 | CG6215  | P{TRIP.HMJ21750}attP40 |
| 34939 | Cklbeta    | FBgn0000259 | CG15224 | P{TRIP.HMS00058}attP2  |
| 35156 | Cks30A     | FBgn0010314 | CG3738  | P{TRIP.GL00024}attP2   |
| 27496 | Cic        | FBgn0024814 | CG6948  | P{TRIP.JF02646}attP2   |
| 25826 | CIC-b      | FBgn0033755 | CG8594  | P{TRIP.JF01844}attP2   |
| 27034 | CIC-c      | FBgn0036566 | CG5284  | P{TRIP.JF02360}attP2   |
| 31265 | CLIP-190   | FBgn0020503 | CG5020  | P{TRIP.JF01206}attP2   |
| 42566 | Clk        | FBgn0023076 | CG7391  | P{TRIP.HMJ02224}attP40 |
| 35734 | cln3       | FBgn0036756 | CG5582  | P{TRIP.HMS01476}attP2  |
| 52966 | clos       | FBgn0261016 | CG42600 | P{TRIP.HMJ21651}attP40 |
| 36816 | Cip        | FBgn0015621 | CG3642  | P{TRIP.GL01037}attP2   |
| 50947 | clt        | FBgn0000326 | CG9858  | P{TRIP.HMJ21046}attP40 |
| 28351 | clumy      | FBgn0026255 | CG8681  | P{TRIP.JF02987}attP2   |
| 27282 | cm         | FBgn0000330 | CG3035  | P{TRIP.JF02594}attP2   |
| 54004 | cmct       | FBgn0040232 | CG6392  | P{TRIP.HMJ21427}attP40 |
| 28642 | cmpy       | FBgn0037015 | CG13253 | P{TRIP.JF03057}attP2   |
| 50714 | Cnb        | FBgn0035295 | CG5690  | P{TRIP.HMS02948}attP40 |
| 40854 | cnc        | FBgn0262975 | CG43286 | P{TRIP.HMS02021}attP40 |
| 26014 | Cng        | FBgn0261612 | CG42701 | P{TRIP.JF02039}attP2   |
| 28684 | cngl       | FBgn0263257 | CG43395 | P{TRIP.JF03099}attP2   |
| 38919 | cni        | FBgn0000339 | CG5855  | P{TRIP.GL00691}attP2   |
| 33366 | cnk        | FBgn0286070 | CG6556  | P{TRIP.HMS00238}attP2  |
| 35761 | cnn        | FBgn0013765 | CG4832  | P{TRIP.HMS01509}attP2  |
| 33367 | cno        | FBgn0259212 | CG42312 | P{TRIP.HMS00239}attP2  |
| 42513 | Cnot4      | FBgn0051716 | CG31716 | P{TRIP.HMJ02078}attP40 |
| 41911 | Cnx99A     | FBgn0015622 | CG11958 | P{TRIP.HMS02304}attP40 |
| 58211 | Cog7       | FBgn0051040 | CG31040 | P{TRIP.HMJ22181}attP40 |
| 33368 | coil       | FBgn0033265 | CG8710  | P{TRIP.HMS00240}attP2  |
| 42916 | cola       | FBgn0050363 | CG30363 | P{TRIP.HMS02609}attP40 |
| 51798 | colt       | FBgn0019830 | CG3057  | P{TRIP.HMC03354}attP40 |
| 28381 | comm       | FBgn0010105 | CG17943 | P{TRIP.JF03018}attP2   |
| 42522 | comr       | FBgn0034667 | CG13493 | P{TRIP.HMJ02088}attP40 |
| 34913 | comt       | FBgn0000346 | CG1618  | P{TRIP.HMS01261}attP2  |
| 28967 | Con        | FBgn0005775 | CG7503  | P{TRIP.HM05178}attP2   |
| 34867 | Cont       | FBgn0037240 | CG1084  | P{TRIP.HMS00186}attP2  |
| 28578 | conv       | FBgn0261269 | CG8561  | P{TRIP.HM05065}attP2   |
| 29350 | Coop       | FBgn0263240 | CG1621  | P{TRIP.JF02512}attP2   |
| 55318 | Coprox     | FBgn0021944 | CG3433  | P{TRIP.HMC04005}attP40 |
| 27054 | Coq2       | FBgn0037574 | CG9613  | P{TRIP.JF02380}attP2   |
| 50522 | COQ7       | FBgn0029502 | CG14437 | P{TRIP.GLC01640}attP2  |
| 35003 | cora       | FBgn0010434 | CG11949 | P{TRIP.HMS01413}attP2  |
| 31743 | CoRest     | FBgn0261573 | CG42687 | P{TRIP.HM04053}attP2   |
| 41721 | Corin      | FBgn0033192 | CG2105  | P{TRIP.HMS02287}attP2  |
| 40841 | coro       | FBgn0033109 | CG9446  | P{TRIP.HMS02007}attP40 |
| 32871 | Cortactin  | FBgn0025865 | CG3637  | P{TRIP.HMS00658}attP2  |
| 42629 | corto      | FBgn0010313 | CG2530  | P{TRIP.HMS02464}attP40 |
| 44472 | cos        | FBgn0000352 | CG1708  | P{TRIP.HMC02347}attP2  |
| 27548 | CoVa       | FBgn0019624 | CG14724 | P{TRIP.JF02700}attP2   |
| 41939 | Cp1        | FBgn0013770 | CG6692  | P{TRIP.HMS02336}attP40 |
| 33944 | Cp190      | FBgn0000283 | CG6384  | P{TRIP.HMS00895}attP2  |
| 42009 | Cp7Fb      | FBgn0014465 | CG15350 | P{TRIP.HMS02410}attP40 |
| 41685 | cpa        | FBgn0034577 | CG10540 | P{TRIP.HMS02249}attP2  |
| 41952 | cpb        | FBgn0011570 | CG17158 | P{TRIP.HMS02349}attP2  |
| 31881 | Cpn        | FBgn0261714 | CG4795  | P{TRIP.JF02156}attP2   |
| 28360 | cpo        | FBgn0000363 | CG43738 | P{TRIP.JF02996}attP2   |



|       |           |             |         |                        |
|-------|-----------|-------------|---------|------------------------|
| 51809 | Cpr       | FBgn0015623 | CG11567 | P(TRIP.HMC03369)attP40 |
| 46715 | Cpr       | FBgn0015623 | CG11567 | VDRC.46715             |
| 54825 | Cpr49Ab   | FBgn0050042 | CG30042 | P(TRIP.HMJ21544)attP40 |
| 58330 | Cpr49Ad   | FBgn0033726 | CG8836  | P(TRIP.HMJ22460)attP40 |
| 54849 | Cpr62Bc   | FBgn0035281 | CG1919  | P(TRIP.HMJ21586)attP40 |
| 51005 | Cpr64Ac   | FBgn0035512 | CG15008 | P(TRIP.HMJ21120)attP40 |
| 58332 | Cpr65Au   | FBgn0042119 | CG18778 | P(TRIP.HMJ22462)attP40 |
| 35011 | Cpr66D    | FBgn0052029 | CG32029 | P(TRIP.HMS01421)attP2  |
| 53878 | Cpr72Ea   | FBgn0036617 | CG4818  | P(TRIP.HMJ21191)attP40 |
| 50893 | Cpsf100   | FBgn0027873 | CG1957  | P(TRIP.HMC02355)attP2  |
| 42478 | Cpsf160   | FBgn0024698 | CG10110 | P(TRIP.GL01166)attP2   |
| 55696 | Cpsf73    | FBgn0261065 | CG7698  | P(TRIP.HMC03910)attP40 |
| 42017 | cpx       | FBgn0041605 | CG32490 | P(TRIP.HMS02442)attP40 |
| 33594 | Crag      | FBgn0025864 | CG12737 | P(TRIP.HMS00241)attP2  |
| 40869 | crb       | FBgn0259685 | CG6383  | P(TRIP.HMS02036)attP2  |
| 38373 | crb       | FBgn0259685 | CG6383  | P(TRIP.HMS01842)attP40 |
| 5544  | crb       | FBgn0259685 | CG6383  | P(UAS-crb.wt)30.12e    |
| 25985 | crc       | FBgn0000370 | CG8669  | P(TRIP.JF02007)attP2   |
| 51271 | Crc       | FBgn0005585 | CG9429  | VDRC.51271             |
| 42562 | CrebA     | FBgn0004396 | CG7450  | P(TRIP.HMJ02218)attP40 |
| 29332 | CrebB-17A | FBgn0265784 | CG6103  | P(TRIP.JF02494)attP2   |
| 50908 | Crg-1     | FBgn0021738 | CG32788 | P(TRIP.HMJ03130)attP40 |
| 30379 | crim      | FBgn0036198 | CG6038  | VDRC.30379             |
| 55277 | Crk       | FBgn0024811 | CG1587  | P(TRIP.HMC03964)attP40 |
| 31338 | crm       | FBgn0000376 | CG2714  | P(TRIP.JF01296)attP2   |
| 31876 | CRMP      | FBgn0023023 | CG1411  | P(TRIP.HM05269)attP2   |
| 29535 | crn       | FBgn0000377 | CG3193  | P(TRIP.HM05215)attP2   |
| 34647 | croc      | FBgn0014143 | CG5069  | P(TRIP.HMS01122)attP2  |
| 41669 | crol      | FBgn0020309 | CG14938 | P(TRIP.HMS02202)attP40 |
| 31896 | crp       | FBgn0001994 | CG7664  | P(TRIP.JF02184)attP2   |
| 40831 | crq       | FBgn0015924 | CG4280  | P(TRIP.HMS01997)attP40 |
| 42561 | Crtc      | FBgn0036746 | CG6064  | P(TRIP.HMJ02217)attP40 |
| 28886 | Crtc      | FBgn0036746 | CG6064  | P(TRIP.HM05069)attP2   |
| 18794 | Crtp      | FBgn0029501 | CG13580 | VDRC.18794             |
| 25859 | cry       | FBgn0025680 | CG3772  | P(TRIP.JF01880)attP2   |
| 25999 | Crz       | FBgn0013767 | CG3302  | P(TRIP.JF02023)attP2   |
| 42751 | CrzR      | FBgn0036278 | CG10698 | P(TRIP.GL00706)attP2   |
| 26017 | CrzR      | FBgn0036278 | CG10698 | P(TRIP.JF02042)attP2   |
| 58321 | CS-2      | FBgn0029091 | CG7464  | P(TRIP.HMJ22450)attP40 |
| 54843 | Csas      | FBgn0052220 | CG32220 | P(TRIP.HMJ21580)attP40 |
| 44488 | Csat      | FBgn0024994 | CG2675  | P(TRIP.HM02402)attP2   |
| 41712 | Csk       | FBgn0262081 | CG42317 | P(TRIP.HMS02277)attP40 |
| 31203 | CSN1a     | FBgn0028838 | CG4697  | P(TRIP.JF01721)attP2   |
| 27303 | CSN1b     | FBgn0027057 | CG3889  | P(TRIP.JF02612)attP2   |
| 33369 | CSN3      | FBgn0027055 | CG18332 | P(TRIP.HMS00242)attP2  |
| 42798 | CSN4      | FBgn0027054 | CG8725  | P(TRIP.GL01169)attP2   |
| 28732 | CSN5      | FBgn0027053 | CG14884 | P(TRIP.JF03159)attP2   |
| 41991 | CSN6      | FBgn0028837 | CG6932  | P(TRIP.HMS02392)attP40 |
| 36073 | CSN6      | FBgn0028837 | CG6932  | P(TRIP.GL00492)attP2   |
| 33663 | CSN7      | FBgn0028836 | CG2038  | P(TRIP.HMS00073)attP2  |
| 33370 | CSN8      | FBgn0261437 | CG42522 | P(TRIP.HMS00243)attP2  |
| 33645 | Csp       | FBgn0004179 | CG6395  | P(TRIP.HMS00046)attP2  |
| 43716 | CstF-50   | FBgn0039867 | CG2261  | VDRC.43716             |
| 21045 | CstF-64   | FBgn0027841 | CG7697  | VDRC.21045             |
| 43200 | csul      | FBgn0015925 | CG3730  | P(TRIP.GL01544)attP40  |
| 33619 | csw       | FBgn0000382 | CG3954  | P(TRIP.HMS00012)attP2  |
| 33967 | ct        | FBgn0004198 | CG11387 | P(TRIP.HMS00924)attP2  |
| 41964 | cta       | FBgn0000384 | CG17678 | P(TRIP.HMS02361)attP2  |
| 32889 | CTBP      | FBgn0020496 | CG7583  | P(TRIP.HMS00677)attP2  |
| 40850 | CTCF      | FBgn0035769 | CG8591  | P(TRIP.HMS02017)attP40 |
| 32968 | Ct14      | FBgn0033890 | CG13350 | P(TRIP.HMS00764)attP2  |
| 44044 | ctp       | FBgn0011760 | CG6998  | P(TRIP.HMS02760)attP2  |
| 42862 | ctp       | FBgn0011760 | CG6998  | P(TRIP.HMS02554)attP40 |
| 31924 | CTPsyn    | FBgn0266452 | CG45070 | P(TRIP.JF02214)attP2   |
| 44000 | Ctr1A     | FBgn0062413 | CG3977  | P(TRIP.HMS02714)attP2  |
| 5804  | Ctr1B     | FBgn0062412 | CG7459  | VDRC.5804              |
| 10263 | Ctr1C     | FBgn0062411 | CG15551 | VDRC.21045             |
| 33435 | ctrip     | FBgn0260794 | CG42574 | P(TRIP.HMS00322)attP2  |

|        |          |             |         |                        |
|--------|----------|-------------|---------|------------------------|
| 45441  | cu       | FBgn0261808 | CG31299 | VDRC.45441             |
| 36875  | cue      | FBgn0011204 | CG12086 | P(TRIP.GL01033)attP2   |
| 35182  | cuff     | FBgn0260932 | CG13190 | P(TRIP.GL00054)attP2   |
| 34988  | Cul-2    | FBgn0032956 | CG1512  | P(TRIP.HMS01398)attP2  |
| 36684  | Cul-3    | FBgn0261268 | CG42616 | P(TRIP.HMS01572)attP2  |
| 50614  | Cul-4    | FBgn0033260 | CG8711  | P(TRIP.HMC02981)attP2  |
| 50707  | Cul-5    | FBgn0039632 | CG1401  | P(TRIP.HMC03109)attP2  |
| 26732  | cup      | FBgn0000392 | CG11181 | P(TRIP.JF02274)attP2   |
| 44480  | cutlet   | FBgn0015376 | CG33122 | VDRC.44480             |
| 9727   | cv       | FBgn0000394 | CG12410 | VDRC.9727              |
| 37514  | cv-2     | FBgn0000395 | CG15671 | P(TRIP.HMS01656)attP40 |
| 3975   | cv-d     | FBgn0265048 | CG31150 | VDRC.3975              |
| 40887  | Cwc25    | FBgn0031452 | CG2843  | P(TRIP.HMS02135)attP40 |
| 36756  | cwo      | FBgn0259938 | CG17100 | P(TRIP.HMS03016)attP2  |
| 42563  | cyc      | FBgn0023094 | CG8727  | P(TRIP.HMJ02219)attP40 |
| 29313  | CycA     | FBgn0000404 | CG5940  | P(TRIP.JF02472)attP2   |
| 40916  | CycB     | FBgn0000405 | CG3510  | P(TRIP.HMS02164)attP2  |
| 41979  | CycB3    | FBgn0015625 | CG5814  | P(TRIP.HMS02377)attP2  |
| 33753  | CycC     | FBgn0004597 | CG7281  | P(TRIP.HMS01095)attP2  |
| 33653  | CycD     | FBgn0010315 | CG9096  | P(TRIP.HMS00059)attP2  |
| 33654  | CycE     | FBgn0010382 | CG3938  | P(TRIP.HMS00060)attP2  |
| 29315  | CycG     | FBgn0039858 | CG11525 | P(TRIP.JF02474)attP2   |
| 34732  | CycH     | FBgn0022936 | CG7405  | P(TRIP.HMS01212)attP2  |
| 37521  | CycJ     | FBgn0010317 | CG10308 | P(TRIP.HMS01663)attP40 |
| 34032  | CycK     | FBgn0025674 | CG15218 | P(TRIP.HMS01003)attP2  |
| 32976  | CycT     | FBgn0025455 | CG6292  | P(TRIP.HMS00776)attP2  |
| 34009  | CycY     | FBgn0032378 | CG14939 | P(TRIP.HMS00974)attP2  |
| 40840  | CYLD     | FBgn0032210 | CG5603  | P(TRIP.HMS02006)attP40 |
| 33950  | Cyp1     | FBgn0004432 | CG9916  | P(TRIP.HMS00902)attP2  |
| 53892  | Cyp28d1  | FBgn0031689 | CG10833 | P(TRIP.HMJ21210)attP40 |
| 51716  | Cyp303a1 | FBgn0001992 | CG4163  | P(TRIP.HMC03249)attP2  |
| 42904  | Cyp318a1 | FBgn0030369 | CG1786  | P(TRIP.HMS02597)attP40 |
| 35611  | cyp33    | FBgn0028382 | CG4886  | P(TRIP.GL00451)attP2   |
| 54023  | Cyp4ac3  | FBgn0031695 | CG14031 | P(TRIP.HMJ21449)attP40 |
| 55687  | Cyp4c3   | FBgn0015032 | CG1438  | P(TRIP.HMC03873)attP40 |
| 52979  | Cyp4d1   | FBgn0005670 | CG3656  | P(TRIP.HMJ21666)attP40 |
| 42600  | Cyp4d2   | FBgn0011576 | CG3466  | P(TRIP.HMS02432)attP40 |
| 36737  | Cyp4g1   | FBgn0010019 | CG3972  | P(TRIP.HMS01628)attP40 |
| 28077  | Cyp4g15  | FBgn0030304 | CG11715 | P(TRIP.JF02914)attP2   |
| 33887  | Cyp6a17  | FBgn0015714 | CG10241 | P(TRIP.HMS00825)attP2  |
| 42824  | Cyp6a18  | FBgn0039519 | CG13977 | P(TRIP.HMS02506)attP40 |
| 53963  | Cyp6a22  | FBgn0013773 | CG10240 | P(TRIP.HMJ21345)attP40 |
| 42006  | Cyp6g1   | FBgn0025454 | CG8453  | P(TRIP.HMS02407)attP40 |
| 50976  | Cyp6t3   | FBgn0033697 | CG8457  | P(TRIP.HMJ21082)attP40 |
| 33878  | cype     | FBgn0015031 | CG14028 | P(TRIP.HMS00815)attP2  |
| 44823  | CypI     | FBgn0035141 | CG13892 | VDRC.44823             |
| 104316 | CypI     | FBgn0035141 | CG13892 | VDRC.104316            |
| 28555  | cyr      | FBgn0030001 | CG15335 | VDRC.28555             |
| 105829 | Cys      | FBgn0004629 | CG8050  | VDRC.105829            |
| 53950  | Cyt-b5   | FBgn0264294 | CG2140  | P(TRIP.HMJ21314)attP40 |
| 42472  | Cyt-b5-r | FBgn0000406 | CG13279 | VDRC.42472             |
| 17128  | Cyt-c-d  | FBgn0086907 | CG13263 | VDRC.17128             |
| 101079 | Cyt-c-d  | FBgn0086907 | CG13263 | VDRC.101079            |
| 33019  | Cyt-c-p  | FBgn0000409 | CG17903 | VDRC.33019             |
| 33754  | d        | FBgn0262029 | CG42840 | P(TRIP.HMS01096)attP2  |
| 34672  | D        | FBgn0000411 | CG5893  | P(TRIP.HMS01150)attP2  |
| 17514  | d-cup    | FBgn0038089 | CG14387 | VDRC.17514             |
| 33655  | D1       | FBgn0000412 | CG9745  | P(TRIP.HMS00061)attP2  |
| 29954  | D12      | FBgn0027490 | CG13400 | VDRC.29954             |
| 33371  | D19A     | FBgn0022935 | CG10269 | P(TRIP.HMS00244)attP2  |
| 51166  | D19B     | FBgn0022699 | CG10270 | P(TRIP.HMJ03125)attP40 |
| 26001  | D2R      | FBgn0053517 | CG33517 | P(TRIP.JF02025)attP2   |
| 28623  | d4       | FBgn0033015 | CG2682  | P(TRIP.JF03038)attP2   |
| 38382  | da       | FBgn0267821 | CG5102  | P(TRIP.HMS01851)attP40 |
| 39058  | DAAM     | FBgn0025641 | CG14622 | P(TRIP.HMS01978)attP2  |
| 42646  | Dab      | FBgn0000414 | CG9695  | P(TRIP.HMS02482)attP2  |
| 35022  | dac      | FBgn0005677 | CG4952  | P(TRIP.HMS01435)attP2  |
| 33759  | Dad      | FBgn0020493 | CG5201  | P(TRIP.HMS01102)attP2  |

|        |                          |                         |         |                        |
|--------|--------------------------|-------------------------|---------|------------------------|
| 50733  | dah                      | FBgn0015926             | CG6157  | P{TRIP.HMS02969}attP2  |
| 35197  | Dak1                     | FBgn0028833             | CG6092  | P{TRIP.GL00071}attP2   |
| 35242  | dalao                    | FBgn0030093             | CG7055  | P{TRIP.GL00129}attP2   |
| 33952  | dally                    | FBgn0263930             | CG4974  | P{TRIP.HMS00905}attP2  |
| 109520 | Damm                     | FBgn0033659             | CG18188 | VDRC.109520            |
| 51501  | dan                      | FBgn0039286             | CG11849 | P{TRIP.HMC03259}attP2  |
| 28378  | danr                     | FBgn0039283             | CG13651 | P{TRIP.JF03015}attP2   |
| 36720  | dap                      | FBgn0010316             | CG1772  | P{TRIP.HMS01610}attP2  |
| 25879  | Dap160                   | FBgn0023388             | CG1099  | P{TRIP.JF01918}attP2   |
| 31987  | dar1                     | FBgn0263239             | CG12029 | P{TRIP.JF03421}attP2   |
| 28743  | dare                     | FBgn0015582             | CG12390 | P{TRIP.JF03171}attP2   |
| 26243  | Dat                      | FBgn0019643             | CG3318  | P{TRIP.JF02142}attP2   |
| 36726  | Dat                      | FBgn0019643             | CG3318  | P{TRIP.HMS01617}attP40 |
| 31256  | DAT                      | FBgn0034136             | CG8380  | P{TRIP.JF01197}attP2   |
| 34974  | daw                      | FBgn0031461             | CG16987 | P{TRIP.HMS01110}attP2  |
| 38940  | dbo                      | FBgn0040230             | CG6224  | P{TRIP.HMS01791}attP2  |
| 55253  | Dbp45A                   | FBgn0010220             | CG12759 | P{TRIP.HMC03940}attP40 |
| 34682  | Dbp80                    | FBgn0024804             | CG17023 | P{TRIP.HMS01160}attP2  |
| 43222  | dbr                      | FBgn0067779             | CG11371 | P{TRIP.GL01567}attP40  |
| 31904  | Dbx                      | FBgn0261723             | CG42234 | P{TRIP.JF02193}attP2   |
| 27719  | dco                      | FBgn0002413             | CG2048  | P{TRIP.JF02800}attP2   |
| 38315  | Dcp-1                    | FBgn0010501             | CG5370  | P{TRIP.HMS01779}attP2  |
| 34806  | Dcp2                     | FBgn0036534             | CG6169  | P{TRIP.HMS00115}attP2  |
| 34826  | Dcr-1                    | FBgn0039016             | CG4792  | P{TRIP.HMS00141}attP2  |
| 33656  | Dcr-2                    | FBgn0034246             | CG6493  | P{TRIP.HMS00062}attP2  |
| 38964  | DCX-EMAP                 | FBgn0259099             | CG42247 | P{TRIP.HMS01878}attP40 |
| 41840  | Dd                       | FBgn0029067             | CG1696  | P{TRIP.GL01268}attP2   |
| 27030  | Ddc                      | FBgn0000422             | CG10697 | P{TRIP.JF02356}attP2   |
| 27531  | Ddx1                     | FBgn0015075             | CG9054  | P{TRIP.JF02682}attP2   |
| 32512  | Deaf1                    | FBgn0013799             | CG8567  | P{TRIP.HMS00516}attP2  |
| 27083  | debcl                    | FBgn0029131             | CG33134 | P{TRIP.JF02429}attP2   |
| 29524  | Def                      | FBgn0010385             | CG1385  | P{TRIP.HMS05201}attP2  |
| 27720  | defl                     | FBgn0036038             | CG18176 | P{TRIP.JF02801}attP2   |
| 28696  | Dek                      | FBgn0026533             | CG5935  | P{TRIP.JF03112}attP2   |
| 32375  | del                      | FBgn0086251             | CG9252  | P{TRIP.HMS00366}attP2  |
| 31764  | deltaCOP                 | FBgn0028969             | CG14813 | P{TRIP.HMS04076}attP2  |
| 55622  | deltaTry.gammaTry.CG3003 | FBgn0010358 FBgn0010359 | CG30031 | P{TRIP.HMC03766}attP40 |
| 37512  | desat1                   | FBgn0086687             | CG5887  | P{TRIP.HMS01654}attP40 |
| 51837  | Det                      | FBgn0264291             | CG12265 | P{TRIP.HMC03409}attP2  |
| 43185  | Df31                     | FBgn0022893             | CG2207  | P{TRIP.GL01529}attP40  |
| 26751  | Dfd                      | FBgn0000439             | CG2189  | P{TRIP.JF02315}attP2   |
| 34895  | Dg                       | FBgn0034072             | CG18250 | P{TRIP.HMS01240}attP2  |
| 41944  | Dgk                      | FBgn0085390             | CG34361 | P{TRIP.HMS02341}attP40 |
| 35340  | Dgkepsilon               | FBgn0020930             | CG8657  | P{TRIP.GL00251}attP2   |
| 35040  | dgo                      | FBgn0086898             | CG12342 | P{TRIP.HMS01454}attP2  |
| 27267  | dgrn                     | FBgn0037384             | CG10981 | P{TRIP.JF02580}attP2   |
| 58162  | dgt1                     | FBgn0039710             | CG18041 | P{TRIP.HMJ22113}attP40 |
| 31729  | dgt2                     | FBgn0032390             | CG16969 | P{TRIP.HMS04038}attP2  |
| 58137  | dgt3                     | FBgn0034569             | CG3221  | P{TRIP.HMJ22086}attP40 |
| 41957  | Dh31                     | FBgn0032048             | CG13094 | P{TRIP.HMS02354}attP2  |
| 25925  | Dh31-R1                  | FBgn0052843             | CG32843 | P{TRIP.JF01945}attP2   |
| 25804  | Dh44                     | FBgn0012344             | CG8348  | P{TRIP.JF01822}attP2   |
| 28780  | Dh44-R1                  | FBgn0033932             | CG8422  | P{TRIP.JF03208}attP2   |
| 29610  | Dh44-R2                  | FBgn0033744             | CG12370 | P{TRIP.JF03289}attP2   |
| 52914  | Dhap-at                  | FBgn0040212             | CG4625  | P{TRIP.HMC03654}attP40 |
| 51726  | Dhc36C                   | FBgn0013810             | CG5526  | P{TRIP.HMC03270}attP2  |
| 36698  | Dhc64C                   | FBgn0261797             | CG7507  | P{TRIP.HMS01587}attP2  |
| 51511  | Dhc93AB                  | FBgn0013812             | CG3723  | P{TRIP.HMC03281}attP2  |
| 41857  | dhd                      | FBgn0011761             | CG4193  | P{TRIP.GL01285}attP2   |
| 35015  | Dhfr                     | FBgn0004087             | CG14887 | P{TRIP.HMS01428}attP2  |
| 51801  | Dhod                     | FBgn0000447             | CG9741  | P{TRIP.HMC03359}attP40 |
| 33424  | dia                      | FBgn0011202             | CG1768  | P{TRIP.HMS00308}attP2  |
| 55740  | didum                    | FBgn0261397             | CG2146  | P{TRIP.HMC03900}attP40 |
| 30513  | Dif                      | FBgn0011274             | CG6794  | P{TRIP.HMS05257}attP2  |
| 32451  | dik                      | FBgn0030891             | CG7098  | P{TRIP.HMS00450}attP2  |
| 32397  | dikar                    | FBgn0261934             | CG42799 | P{TRIP.HMS00391}attP2  |
| 55171  | Dim1                     | FBgn0031601             | CG3058  | P{TRIP.HMC03851}attP40 |
| 38530  | dimm                     | FBgn0023091             | CG8667  | P{TRIP.HMS01742}attP2  |

|        |                 |             |         |                        |
|--------|-----------------|-------------|---------|------------------------|
| 54045  | Dip-B           | FBgn0000454 | CG9285  | P(TRIP.HMJ21488)attP40 |
| 51708  | Dip-C           | FBgn0000455 | CG5663  | P(TRIP.HMC03216)attP40 |
| 35333  | DIP1            | FBgn0024807 | CG17686 | P(TRIP.GL00242)attP2   |
| 27265  | Dip2            | FBgn0040466 | CG9771  | P(TRIP.JF02548)attP2   |
| 42598  | DIP2            | FBgn0024806 | CG7020  | P(TRIP.HMS02430)attP40 |
| 27067  | Dip3            | FBgn0040465 | CG12767 | P(TRIP.JF02412)attP2   |
| 28659  | disco           | FBgn0000459 | CG9908  | P(TRIP.JF03074)attP2   |
| 41683  | disco-r         | FBgn0285879 | CG32577 | P(TRIP.HMS02247)attP2  |
| 27247  | disp            | FBgn0029088 | CG2019  | P(TRIP.JF02550)attP2   |
| 39055  | DJ-1alpha       | FBgn0033885 | CG6646  | P(TRIP.HMS01975)attP40 |
| 51177  | DJ-1alpha       | FBgn0033885 | CG6646  | P(TRIP.HMJ21180)attP40 |
| 38999  | dj-1beta        | FBgn0039802 | CG1349  | P(TRIP.HMS01915)attP2  |
| 32934  | dl              | FBgn0260632 | CG6667  | P(TRIP.HMS00727)attP2  |
| 34322  | DI              | FBgn0000463 | CG3619  | P(TRIP.HMS01309)attP2  |
| 39035  | dlg1            | FBgn0001624 | CG1725  | P(TRIP.HMS01954)attP40 |
| 35286  | dlg1            | FBgn0001624 | CG1725  | P(TRIP.GL00188)attP2   |
| 29337  | DII             | FBgn0000157 | CG3629  | P(TRIP.JF02499)attP2   |
| 34091  | dIIP            | FBgn0041604 | CG32146 | P(TRIP.HMS00903)attP2  |
| 38253  | dIt             | FBgn0024510 | CG32315 | P(TRIP.HMS01697)attP40 |
| 42866  | dIt             | FBgn0024510 | CG32315 | P(TRIP.HMS02559)attP40 |
| 36123  | dm              | FBgn0262656 | CG10798 | P(TRIP.HMS01538)attP2  |
| 36724  | dmGlut          | FBgn0010497 | CG5304  | P(TRIP.HMS01615)attP2  |
| 28596  | Dmn             | FBgn0021825 | CG8269  | P(TRIP.HM05084)attP2   |
| 35657  | dmr11E          | FBgn0030477 | CG15749 | P(TRIP.GLV21022)attP2  |
| 27657  | dmr193B         | FBgn0038851 | CG5737  | P(TRIP.JF02735)attP2   |
| 31982  | dmr199B         | FBgn0039683 | CG15504 | P(TRIP.JF03416)attP2   |
| 26245  | Dms             | FBgn0011581 | CG6440  | P(TRIP.JF02144)attP2   |
| 27529  | DmsR-1          | FBgn0035331 | CG8985  | P(TRIP.JF02680)attP2   |
| 25832  | DmsR-2          | FBgn0264002 | CG43745 | P(TRIP.JF01850)attP2   |
| 34564  | DNA-ligI        | FBgn0262619 | CG5602  | P(TRIP.HMS01036)attP2  |
| 32978  | DnaJ-1          | FBgn0263106 | CG10578 | P(TRIP.HMS00778)attP2  |
| 53341  | DNApol-alpha180 | FBgn0259113 | CG6349  | P(TRIP.HMC03570)attP40 |
| 44584  | DNApol-alpha60  | FBgn0259676 | CG5553  | P(TRIP.HMS02881)attP2  |
| 51775  | DNApol-epsilon  | FBgn0264326 | CG6768  | P(TRIP.HMC03330)attP40 |
| 33410  | DNApol-eta      | FBgn0037141 | CG7143  | P(TRIP.HMS00290)attP2  |
| 51158  | DNApol-gamma35  | FBgn0004407 | CG33650 | P(TRIP.HMC02394)attP2  |
| 36648  | DNApol-iota     | FBgn0037554 | CG7602  | P(TRIP.GL00608)attP2   |
| 27250  | dnc             | FBgn0000479 | CG32498 | P(TRIP.JF02561)attP2   |
| 34383  | dnd             | FBgn0038916 | CG6560  | P(TRIP.HMS01373)attP2  |
| 35219  | dnk             | FBgn0022338 | CG5452  | P(TRIP.GL00100)attP2   |
| 37469  | dnt             | FBgn0024245 | CG17559 | P(TRIP.GL00241)attP2   |
| 50903  | Doa             | FBgn0265998 | CG42320 | P(TRIP.HMJ03121)attP40 |
| 31931  | Doc1            | FBgn0028789 | CG5133  | P(TRIP.JF02222)attP2   |
| 44087  | Doc2            | FBgn0035956 | CG5187  | P(TRIP.HMS02804)attP2  |
| 31932  | Doc3            | FBgn0035954 | CG5093  | P(TRIP.JF02223)attP2   |
| 27728  | dock            | FBgn0010583 | CG3727  | P(TRIP.JF02810)attP2   |
| 41674  | dom             | FBgn0020306 | CG9696  | P(TRIP.HMS02208)attP2  |
| 34618  | dome            | FBgn0043903 | CG14226 | P(TRIP.HMS01293)attP2  |
| 55239  | Dop1R1          | FBgn0011582 | CG9652  | P(TRIP.HMC02344)attP2  |
| 31765  | Dop1R1          | FBgn0011582 | CG9652  | P(TRIP.HM04077)attP2   |
| 102676 | Dop1R1          | FBgn0011582 | CG9652  | P(Bac(WH)Dop1R1-f02676 |
| 51423  | Dop1R2          | FBgn0266137 | CG18741 | P(TRIP.HMC02893)attP2  |
| 31981  | DopEcR          | FBgn0035538 | CG18314 | P(TRIP.JF03415)attP2   |
| 26018  | DopR2           | FBgn0266137 | CG18741 | P(TRIP.JF02043)attP2   |
| 44426  | dor             | FBgn0000482 | CG3093  | P(TRIP.GL01364)attP2   |
| 31766  | dos             | FBgn0016794 | CG1044  | P(TRIP.HM04078)attP2   |
| 33372  | Dp              | FBgn0011763 | CG4654  | P(TRIP.HMS00245)attP2  |
| 36691  | dp              | FBgn0053196 | CG33196 | P(TRIP.HMS01580)attP2  |
| 32872  | Dp1             | FBgn0027835 | CG5170  | P(TRIP.HMS00659)attP2  |
| 28620  | dpa             | FBgn0015929 | CG1616  | P(TRIP.JF03035)attP2   |
| 35458  | dpa             | FBgn0015929 | CG1616  | P(TRIP.GL00384)attP2   |
| 35483  | Dph5            | FBgn0024558 | CG31289 | P(TRIP.GL00412)attP2   |
| 51440  | dpn             | FBgn0010109 | CG8704  | P(TRIP.HMC03154)attP2  |
| 33618  | dpp             | FBgn0000490 | CG9885  | P(TRIP.HMS00011)attP2  |
| 27991  | dpr10           | FBgn0052057 | CG32057 | P(TRIP.JF02920)attP2   |
| 28782  | dpr12           | FBgn0085414 | CG34385 | P(TRIP.JF03210)attP2   |
| 29626  | dpr14           | FBgn0029974 | CG10946 | P(TRIP.JF03305)attP2   |
| 41656  | dpr17           | FBgn0051361 | CG31361 | P(TRIP.GL01238)attP2   |

|       |              |             |         |                         |
|-------|--------------|-------------|---------|-------------------------|
| 29604 | dpr18        | FBgn0030723 | CG14948 | P{TRiP.JF03283}attP2    |
| 28293 | dpr20        | FBgn0035170 | CG12191 | P{TRiP.JF02923}attP2    |
| 29627 | dpr5         | FBgn0037908 | CG5308  | P{TRiP.JF03306}attP2    |
| 28744 | dpr8         | FBgn0052600 | CG32600 | P{TRiP.JF03172}attP2    |
| 33409 | dpr9         | FBgn0038282 | CG33485 | P{TRiP.HMS00288}attP2   |
| 53923 | Dpt          | FBgn0004240 | CG12763 | P{TRiP.HMJ21267}attP40  |
| 28975 | DptB         | FBgn0034407 | CG10794 | P{TRiP.HM05186}attP2    |
| 41946 | Dpy-30L1     | FBgn0032293 | CG6444  | P{TRiP.HMS02343}attP2   |
| 26224 | Dr           | FBgn0000492 | CG1897  | P{TRiP.JF02122}attP2    |
| 29449 | Drak         | FBgn0052666 | CG32666 | P{TRiP.JF03385}attP2    |
| 41677 | dre4         | FBgn0002183 | CG1828  | P{TRiP.HMS02241}attP40  |
| 54059 | dream        | FBgn0033051 | CG7863  | P{TRiP.HMJ21268}attP40  |
| 34070 | Dredd        | FBgn0020381 | CG7486  | P{TRiP.HMS00063}attP2   |
| 31941 | Dref         | FBgn0015664 | CG5838  | P{TRiP.JF02232}attP2    |
| 28628 | Drep-3       | FBgn0028407 | CG8364  | P{TRiP.JF03043}attP2    |
| 44661 | Drip         | FBgn0015872 | CG9023  | P{TRiP.HMC02945}attP2   |
| 41692 | drk          | FBgn0004638 | CG6033  | P{TRiP.HMS02256}attP2   |
| 39002 | dri          | FBgn0015380 | CG17348 | P{TRiP.HMS01918}attP2   |
| 25961 | Dri-2        | FBgn0033791 | CG3915  | P{TRiP.JF01981}attP2    |
| 42548 | drm          | FBgn0024244 | CG10016 | P{TRiP.HMJ202120}attP40 |
| 36089 | Droj2        | FBgn0038145 | CG8863  | P{TRiP.GL00508}attP2    |
| 38960 | drongo       | FBgn0020304 | CG3365  | P{TRiP.HMS01874}attP40  |
| 33657 | droscha      | FBgn0026722 | CG8730  | P{TRiP.HMS00064}attP2   |
| 27682 | Drp1         | FBgn0026479 | CG3210  | P{TRiP.JF02762}attP2    |
| 36732 | drpr         | FBgn0027594 | CG2086  | P{TRiP.HMS01623}attP2   |
| 32964 | ds           | FBgn0284247 | CG17941 | P{TRiP.HMS00759}attP2   |
| 38945 | Dscam        | FBgn0033159 | CG17800 | P{TRiP.HMS01859}attP2   |
| 51839 | Dscam2       | FBgn0265296 | CG42256 | P{TRiP.HMC03411}attP2   |
| 51508 | Dscam4       | FBgn0263219 | CG42330 | P{TRiP.HMC03277}attP2   |
| 53318 | dsd          | FBgn0039528 | CG5634  | P{TRiP.HMC03547}attP2   |
| 41707 | dsf          | FBgn0015381 | CG9019  | P{TRiP.HMS02272}attP40  |
| 31307 | dsh          | FBgn0000499 | CG18361 | P{TRiP.JF01254}attP2    |
| 31306 | dsh          | FBgn0000499 | CG18361 | P{TRiP.JF01253}attP2    |
| 25869 | Dsk          | FBgn0000500 | CG18090 | P{TRiP.JF01908}attP2    |
| 32920 | Dsor1        | FBgn0010269 | CG15793 | P{TRiP.HMS00710}attP2   |
| 31960 | Dsp1         | FBgn0278608 | CG12223 | P{TRiP.JF02732}attP2    |
| 26716 | dsx          | FBgn0000504 | CG11094 | P{TRiP.JF02256}attP2    |
| 53964 | dsx-c73A     | FBgn0261799 | CG32159 | P{TRiP.HMJ21346}attP40  |
| 25812 | dtr          | FBgn0023090 | CG31623 | P{TRiP.JF01830}attP2    |
| 32903 | Duox         | FBgn0283531 | CG3131  | P{TRiP.HMS00692}attP2   |
| 33975 | Duox         | FBgn0283531 | CG3131  | P{TRiP.HMS00934}attP2   |
| 29562 | dup          | FBgn0000996 | CG8171  | P{TRiP.JF03241}attP2    |
| 41844 | dUTPase      | FBgn0250837 | CG4584  | P{TRiP.GL01272}attP2    |
| 26225 | dve          | FBgn0020307 | CG5799  | P{TRiP.JF02123}attP2    |
| 31109 | dwg          | FBgn0000520 | CG2711  | P{TRiP.HMJ01580}attP2   |
| 35666 | dwg          | FBgn0000520 | CG2711  | P{TRiP.GLV21031}attP2   |
| 35677 | dx           | FBgn0000524 | CG3929  | P{TRiP.GLV21042}attP2   |
| 27041 | dx           | FBgn0000524 | CG3929  | P{TRiP.JF02367}attP2    |
| 34382 | dy           | FBgn0004511 | CG9355  | P{TRiP.HMS01372}attP2   |
| 32935 | Dyb          | FBgn0033739 | CG8529  | P{TRiP.HMS00728}attP2   |
| 30491 | dyn-p25      | FBgn0040228 | CG10846 | P{TRiP.HM05233}attP2    |
| 35393 | Dyrk2        | FBgn0016930 | CG4551  | P{TRiP.GL00313}attP2    |
| 41626 | Dyrk2        | FBgn0016930 | CG4551  | P{TRiP.GL01208}attP2    |
| 41595 | Dyrk3        | FBgn0027101 | CG40478 | P{TRiP.GL01131}attP2    |
| 31553 | Dys          | FBgn0260003 | CG34157 | P{TRiP.JF01118}attP2    |
| 35010 | dys          | FBgn0039411 | CG32474 | P{TRiP.HMS01420}attP2   |
| 28945 | dysc         | FBgn0264006 | CG43749 | P{TRiP.HM05156}attP2    |
| 14082 | dysc         | FBgn0264006 | CG43749 | VDR.C.14082             |
| 28612 | e            | FBgn0000527 | CG3331  | P{TRiP.JF03027}attP2    |
| 33658 | E(bx)        | FBgn0000541 | CG32346 | P{TRiP.HMS00065}attP2   |
| 28686 | E(Pc)        | FBgn0000581 | CG7776  | P{TRiP.JF03101}attP2    |
| 35271 | E(Pc)        | FBgn0000581 | CG7776  | P{TRiP.GL00169}attP2    |
| 53301 | e(r)         | FBgn0011586 | CG1871  | P{TRiP.HMC03528}attP40  |
| 26322 | E(spl)       | FBgn0000591 | CG8365  | P{TRiP.JF02096}attP2    |
| 55302 | E(spl)m3-HLH | FBgn0002609 | CG8346  | P{TRiP.HMC03989}attP2   |
| 25977 | E(spl)m3-HLH | FBgn0002609 | CG8346  | P{TRiP.JF01999}attP2    |
| 51466 | E(spl)m5-HLH | FBgn0002631 | CG6096  | P{TRiP.HMC03206}attP2   |
| 26201 | E(spl)m5-HLH | FBgn0002631 | CG6096  | P{TRiP.JF02099}attP2    |

|        |                  |             |         |                           |
|--------|------------------|-------------|---------|---------------------------|
| 50674  | E(spl)mbeta-HLH  | FBgn0002733 | CG14548 | P(TRIP.HMC03075)attP2     |
| 26202  | E(spl)mbeta-HLH  | FBgn0002733 | CG14548 | P(TRIP.JF02100)attP2      |
| 51762  | E(spl)mgamma-HLH | FBgn0002735 | CG8333  | P(TRIP.HMC03315)attP2     |
| 25978  | E(spl)mgamma-HLH | FBgn0002735 | CG8333  | P(TRIP.JF02000)attP2      |
| 31948  | E(var)j3-9       | FBgn0260243 | CG11971 | P(TRIP.JF02240)attP2      |
| 32345  | e(y)1            | FBgn0000617 | CG6474  | P(TRIP.HMS00336)attP2     |
| 42524  | e(y)2            | FBgn0000618 | CG15191 | P(TRIP.HMJ02090)attP40    |
| 32346  | e(y)3            | FBgn0087008 | CG12238 | P(TRIP.HMS00337)attP2     |
| 33659  | E(z)             | FBgn0000629 | CG6502  | P(TRIP.HMS00066)attP2     |
| 26252  | E23              | FBgn0020445 | CG3327  | P(TRIP.JF02151)attP2      |
| 36126  | E2f              | FBgn0011766 | CG6376  | P(TRIP.HMS01541)attP2     |
| 36674  | E2f2             | FBgn0024371 | CG1071  | P(TRIP.HMS01562)attP2     |
| 41961  | ea               | FBgn0000533 | CG4920  | P(TRIP.HMS02358)attP2     |
| 43287  | Eaat1            | FBgn0026439 | CG3747  | P(TRIP.HMS02659)attP40    |
| 40832  | Eaat2            | FBgn0026438 | CG3159  | P(TRIP.HMS01998)attP40    |
| 33905  | Eaf6             | FBgn0035624 | CG12756 | P(TRIP.HMS00847)attP2     |
| 31679  | eag              | FBgn0000535 | CG10952 | P(TRIP.JF01472)attP2      |
| 55678  | Eap              | FBgn0035063 | CG3594  | P(TRIP.HMC03845)attP40    |
| 43650  | Eap              | FBgn0035063 | CG3594  | VDRC.43650                |
| 34798  | ear              | FBgn0026441 | CG4913  | P(TRIP.HMS00107)attP2     |
| 38528  | eas              | FBgn0000536 | CG3525  | P(TRIP.HMS01734)attP2     |
| 33879  | east             | FBgn0261954 | CG4399  | P(TRIP.HMS00816)attP2     |
| 25863  | eater            | FBgn0243514 | CG6124  | P(TRIP.JF01884)attP2      |
| 36680  | Eb1              | FBgn0027066 | CG3265  | P(TRIP.HMS01568)attP40    |
| 28605  | Eb1              | FBgn0027066 | CG3265  | P(TRIP.HM05093)attP2      |
| 35765  | ebd1             | FBgn0035153 | CG3371  | P(TRIP.HMS01513)attP2     |
| 17113  | ebd2             | FBgn0037076 | CG12972 | VDRC.17113                |
| 34981  | ebi              | FBgn0263933 | CG4063  | P(TRIP.HMS01390)attP2     |
| 106671 | ec               | FBgn0000542 | CG2904  | VDRC.106671               |
| 49749  | eca              | FBgn0069242 | CG33104 | VDRC.49749                |
| 41676  | ecd              | FBgn0000543 | CG5714  | P(TRIP.HMS02211)attP2     |
| 31343  | eco              | FBgn0035766 | CG8598  | P(TRIP.JF01301)attP2      |
| 36789  | eco              | FBgn0035766 | CG8598  | P(TRIP.GL00528)attP2      |
| 29374  | EcR              | FBgn0000546 | CG1765  | P(TRIP.JF02538)attP2      |
| 31287  | ECSIT            | FBgn0028436 | CG10610 | VDRC.31287                |
| 104650 | ect              | FBgn0000451 | CG6611  | VDRC.104650               |
| 41655  | Ect3             | FBgn0260746 | CG3132  | P(TRIP.GL01237)attP2      |
| 31175  | Ect4             | FBgn0262579 | CG43119 | P(TRIP.JF01681)attP2      |
| 38243  | ed               | FBgn0000547 | CG12676 | P(TRIP.HMS01687)attP40    |
| 34953  | Edc3             | FBgn0036735 | CG6311  | P(TRIP.HMS00392)attP2     |
| 6922   | Edem1            | FBgn0023511 | CG3810  | VDRC.6922                 |
| 14289  | edin             | FBgn0052185 | CG32185 | VDRC.14289                |
| 36917  | EDTP             | FBgn0027506 | CG6542  | P(TRIP.HMS01577)attP2     |
| 29605  | eEF1delta        | FBgn0032198 | CG4912  | P(TRIP.JF03284)attP2      |
| 46144  | EF-G2            | FBgn0051159 | CG31159 | VDRC.46144                |
| 52343  | Ef1alpha100E     | FBgn0000557 | CG1873  | VDRC.52343                |
| 33960  | Ef1alpha48D      | FBgn0284245 | CG8280  | P(TRIP.HMS00917)attP2     |
| 45571  | Ef1beta          | FBgn0028737 | CG6341  | VDRC.52343                |
| 31589  | Ef1gamma         | FBgn0029176 | CG11901 | VDRC.31589                |
| 107268 | EF2              | FBgn0000559 | CG2238  | VDRC.107268               |
| 42321  | Efa6             | FBgn0051158 | CG31158 | VDRC.42321                |
| 31875  | eff              | FBgn0011217 | CG7425  | P(TRIP.HM05268)attP2      |
| 35431  | eff              | FBgn0011217 | CG7425  | P(TRIP.TRIP.GL00355)attP2 |
| 26691  | eff              | FBgn0011217 | CG7425  | P(UAS-eff.HA)1.4          |
| 14837  | Efhc1.1          | FBgn0030691 | CG8959  | VDRC.14837                |
| 31407  | Efhc1.2          | FBgn0034487 | CG11048 | VDRC.31407                |
| 30238  | Efr              | FBgn0029849 | CG3774  | VDRC.30238                |
| 31161  | EFSec            | FBgn0034627 | CG9841  | P(TRIP.JF01654)attP2      |
| 32868  | EFTuM            | FBgn0024556 | CG6050  | P(TRIP.HMS00655)attP2     |
| 29629  | eg               | FBgn0000560 | CG7383  | P(TRIP.JF03308)attP2      |
| 36773  | Egfr             | FBgn0003731 | CG10079 | P(TRIP.JF02384)attP2      |
| 32445  | egg              | FBgn0086908 | CG12196 | P(TRIP.HMS00443)attP2     |
| 28687  | egh              | FBgn0001404 | CG9659  | P(TRIP.JF03102)attP2      |
| 28969  | egl              | FBgn0000562 | CG4051  | P(TRIP.HM05180)attP2      |
| 36739  | Egm              | FBgn0086712 | CG9006  | P(TRIP.HMS01630)attP40    |
| 55276  | egr              | FBgn0033483 | CG12919 | P(TRIP.HMC03963)attP40    |
| 58993  | egr              | FBgn0033483 | CG12919 | P(UAS-eiger.IR)3          |
| 26244  | Eh               | FBgn0000564 | CG5400  | P(TRIP.JF02143)attP2      |

|        |               |             |         |                           |
|--------|---------------|-------------|---------|---------------------------|
| 42939  | Ehbp1         | FBgn0034180 | CG15609 | P(TRIP.HMS02632)attP40    |
| 31143  | Ehbp1         | FBgn0034180 | CG15609 | P(TRIP.JF01618)attP2      |
| 29316  | elF-1A        | FBgn0026250 | CG8053  | P(TRIP.JF02475)attP2      |
| 44449  | elF-2alpha    | FBgn0261609 | CG9946  | P(TRIP.GLC01598)attP2     |
| 32914  | elF-2gamma    | FBgn0263740 | CG43665 | P(TRIP.HMS00704)attP2     |
| 55603  | elF-3p40      | FBgn0022023 | CG9124  | P(TRIP.GL01831)attP2      |
| 33970  | elF-4a        | FBgn0001942 | CG9075  | P(TRIP.HMS00927)attP2     |
| 34096  | elF-4E        | FBgn0015218 | CG4035  | P(TRIP.HMS00969)attP2     |
| 55624  | elF2B-alpha   | FBgn0039726 | CG7883  | P(TRIP.HMC03768)attP40    |
| 41834  | elF2B-beta    | FBgn0024996 | CG2677  | P(TRIP.GL01262)attP2      |
| 51891  | elF2B-delta   | FBgn0034858 | CG10315 | P(TRIP.HMC03465)attP40    |
| 55321  | elF2B-epsilon | FBgn0023512 | CG3806  | P(TRIP.HMC04008)attP40    |
| 41948  | elF2B-gamma   | FBgn0034029 | CG8190  | P(TRIP.HMS02345)attP40    |
| 34353  | elF3-S10      | FBgn0037249 | CG9805  | P(TRIP.HMS01342)attP2     |
| 32880  | elF3-S9       | FBgn0034237 | CG4878  | P(TRIP.HMS00668)attP2     |
| 32907  | elF4AII       | FBgn0037573 | CG7483  | P(TRIP.HMS00696)attP2     |
| 42804  | elF4E-3       | FBgn0265089 | CG8023  | P(TRIP.GL01177)attP2      |
| 50951  | elF4E-4       | FBgn0035709 | CG10124 | P(TRIP.HMJ21052)attP40    |
| 33049  | elF4G         | FBgn0023213 | CG10811 | P(TRIP.HMS00762)attP2     |
| 41963  | elF4G2        | FBgn0260634 | CG10192 | P(TRIP.HMS02360)attP2     |
| 34841  | elF5          | FBgn0030719 | CG9177  | P(TRIP.HMS00159)attP2     |
| 44418  | elF5B         | FBgn0026259 | CG10840 | P(TRIP.GL01593)attP2      |
| 53984  | Eig71Ea       | FBgn0004588 | CG16931 | P(TRIP.HMJ21384)attP40    |
| 109522 | Eig71Eb       | FBgn0004589 | CG7355  | VDRC.109522               |
| 55930  | Eig71Ef       | FBgn0004593 | CG7599  | P(TRIP.HMC04218)attP40    |
| 53022  | Eig71Ei       | FBgn0014849 | CG7327  | P(TRIP.HMJ21745)attP40    |
| 36766  | Eip55E        | FBgn0000566 | CG5345  | P(TRIP.HMS03027)attP2     |
| 28901  | Eip63E        | FBgn0000564 | CG10579 | P(TRIP.HMS05111)attP2     |
| 102809 | Eip63F-1      | FBgn0004910 | CG15855 | VDRC.102809               |
| 42877  | Eip71CD       | FBgn0000565 | CG7266  | P(TRIP.HMS02570)attP40    |
| 29353  | Eip74EF       | FBgn0000567 | CG32180 | P(TRIP.JF02515)attP2      |
| 35780  | Eip75B        | FBgn0000568 | CG8127  | P(TRIP.HMS01530)attP40    |
| 26718  | Eip78C        | FBgn0004865 | CG18023 | P(TRIP.JF02258)attP2      |
| 16474  | Ela           | FBgn0013949 | CG7021  | VDRC.16474                |
| 28371  | elav          | FBgn0260400 | CG4262  | P(TRIP.JF03008)attP2      |
| 41960  | elB           | FBgn0004858 | CG4220  | P(TRIP.HMS02357)attP2     |
| 108965 | Elba3         | FBgn0031621 | CG15634 | VDRC.108965               |
| 36703  | Elf           | FBgn0020443 | CG6382  | P(TRIP.HMS01592)attP2     |
| 19330  | elfless       | FBgn0032660 | CG15150 | VDRC.19330                |
| 32830  | elgi          | FBgn0036546 | CG17033 | VDRC.32830                |
| 25821  | elk           | FBgn0011589 | CG5076  | P(TRIP.JF01839)attP2      |
| 40843  | elm           | FBgn0037358 | CG2185  | P(TRIP.HMS02009)attP40    |
| 53307  | Elo68alpha    | FBgn0052072 | CG32072 | P(TRIP.HMC03535)attP2     |
| 50646  | Elo68beta     | FBgn0036128 | CG11801 | P(TRIP.HMC03046)attP2     |
| 50646  | Elo68beta     | FBgn0036128 | CG11801 | P(TRIP.HMC03046)attP2     |
| 37017  | EloA          | FBgn0039066 | CG6755  | P(TRIP.HMS01255)attP2     |
| 12952  | EloB          | FBgn0023212 | CG4204  | VDRC.12952                |
| 44660  | eloF          | FBgn0037762 | CG16905 | P(TRIP.HMC02915)attP2     |
| 34818  | Elongin-C     | FBgn0266711 | CG9291  | P(TRIP.HMS00128)attP2     |
| 45366  | Elp1          | FBgn0037926 | CG10535 | VDRC.45366                |
| 17560  | Elp2          | FBgn0033540 | CG11887 | VDRC.17560                |
| 35488  | Elp3          | FBgn0031604 | CG15433 | P(TRIP.GL00417)attP2      |
| 51711  | ema           | FBgn0038427 | CG12753 | P(TRIP.HMC03234)attP40    |
| 34021  | emb           | FBgn0020497 | CG13387 | P(TRIP.HMS00991)attP2     |
| 26738  | emc           | FBgn0000575 | CG1007  | P(TRIP.JF02300)attP2      |
| 40947  | emp           | FBgn0010435 | CG2727  | P(TRIP.HMS02195)attP40    |
| 28726  | ems           | FBgn0000576 | CG2988  | P(TRIP.JF03153)attP2      |
| 33715  | en            | FBgn0000577 | CG9015  | P(TRIP.HMS00595)attP2     |
| 39034  | ena           | FBgn0000578 | CG15112 | P(TRIP.HMS01953)attP2     |
| 42797  | enc           | FBgn0004875 | CG10847 | P(TRIP.GL01168)attP2      |
| 27679  | endoA         | FBgn0038659 | CG14296 | P(TRIP.JF02758)attP2      |
| 34935  | endoB         | FBgn0034433 | CG9834  | P(TRIP.HMS01285)attP2     |
| 55228  | EndoG         | FBgn0033690 | CG8862  | P(TRIP.GLC01845)attP2     |
| 38084  | EndoG         | FBgn0033690 | CG8862  | VDRC.38084                |
| 40563  | EndoGI        | FBgn0028515 | CG4930  | VDRC.40563                |
| 53250  | endos         | FBgn0061515 | CG6513  | P(TRIP.GLC01809)attP2     |
| 26300  | Eno           | FBgn0000579 | CG17654 | P(TRIP.JF02070)attP2      |
| 41647  | Eno           | FBgn0000579 | CG17654 | P(TRIP.GL01229)attP2/TM3. |

|        |            |             |         |                        |
|--------|------------|-------------|---------|------------------------|
| 40917  | enok       | FBgn0034975 | CG11290 | P{TRIP.HMS02165}attP2  |
| 40825  | ens        | FBgn0264693 | CG14998 | P{TRIP.HMS00933}attP2  |
| 51055  | Ent1       | FBgn0031250 | CG11907 | P{TRIP.HMJ21190}attP40 |
| 7618   | Ent2       | FBgn0263916 | CG31911 | VDR.C.7618             |
| 14811  | Eo         | FBgn0030597 | CG9504  | VDR.C.14811            |
| 29317  | Epac       | FBgn0085421 | CG34392 | P{TRIP.JF02476}attP2   |
| 39066  | Eph        | FBgn0025936 | CG1511  | P{TRIP.HMS01986}attP40 |
| 34614  | Ephrin     | FBgn0040324 | CG1862  | P{TRIP.HMS01289}attP2  |
| 33987  | Eps-15     | FBgn0035060 | CG16932 | P{TRIP.HMS00947}attP2  |
| 28890  | epsilonCOP | FBgn0027496 | CG9543  | P{TRIP.HM05100}attP2   |
| 53374  | epsilonTry | FBgn0010425 | CG18681 | P{TRIP.HMC03603}attP40 |
| 36906  | Ercc1      | FBgn0028434 | CG10215 | P{TRIP.GL01110}attP2   |
| 45027  | eRF1       | FBgn0036974 | CG5605  | VDR.C.45027            |
| 55657  | ergic53    | FBgn0035909 | CG6822  | P{TRIP.HMC03809}attP40 |
| 26778  | erm        | FBgn0031375 | CG31670 | P{TRIP.JF02342}attP2   |
| 33935  | ERp60      | FBgn0033663 | CG8983  | P{TRIP.HMS00885}attP2  |
| 51674  | ERp60      | FBgn0033663 | CG8983  | VDR.C.51674            |
| 27085  | ERR        | FBgn0035849 | CG7404  | P{TRIP.JF02431}attP2   |
| 43285  | Es2        | FBgn0023506 | CG1474  | P{TRIP.HMS02657}attP40 |
| 31618  | esc        | FBgn0000588 | CG14941 | P{TRIP.JF01403}attP2   |
| 49982  | escl       | FBgn0032391 | CG5202  | VDR.C.49982            |
| 34063  | esg        | FBgn0001981 | CG3758  | P{TRIP.HMS00025}attP2  |
| 34371  | esn        | FBgn0263934 | CG43722 | P{TRIP.HMS01360}attP2  |
| 35607  | Est-6      | FBgn0000592 | CG6917  | VDR.C.35607            |
| 30868  | Est-P      | FBgn0000594 | CG17148 | VDR.C.30868            |
| 50964  | Est-Q      | FBgn0037090 | CG7529  | P{TRIP.HMJ21068}attP40 |
| 8146   | Est-Q      | FBgn0037090 | CG7529  | VDR.C.8146             |
| 42557  | et         | FBgn0031055 | CG14225 | P{TRIP.HMJ02213}attP40 |
| 55731  | etaTry     | FBgn0011554 | CG12386 | P{TRIP.HMC03744}attP40 |
| 33233  | etaTry     | FBgn0011554 | CG12386 | VDR.C.33233            |
| 26242  | ETH        | FBgn0028738 | CG18105 | P{TRIP.JF02141}attP2   |
| 28783  | ETHR       | FBgn0038874 | CG5911  | P{TRIP.JF03211}attP2   |
| 33891  | Etl1       | FBgn0032157 | CG5899  | P{TRIP.HMS00829}attP2  |
| 39069  | Ets21C     | FBgn0005660 | CG2914  | P{TRIP.HMS01989}attP2  |
| 41682  | Ets65A     | FBgn0005658 | CG7018  | P{TRIP.HMS02246}attP2  |
| 34783  | Ets96B     | FBgn0039225 | CG6892  | P{TRIP.HMS00092}attP2  |
| 35749  | Ets97D     | FBgn0004510 | CG6338  | P{TRIP.HMS01491}attP2  |
| 28700  | Ets98B     | FBgn0005659 | CG5583  | P{TRIP.JF03116}attP2   |
| 34325  | eve        | FBgn0000606 | CG2328  | P{TRIP.HMS01312}attP2  |
| 31225  | ewg        | FBgn0005427 | CG3114  | P{TRIP.JF01783}attP2   |
| 34968  | ex         | FBgn0004583 | CG4114  | P{TRIP.HMS00874}attP2  |
| 27248  | exba       | FBgn0250753 | CG2922  | P{TRIP.JF02556}attP2   |
| 34897  | exd        | FBgn0000611 | CG8933  | P{TRIP.HMS01242}attP2  |
| 33373  | Exn        | FBgn0261547 | CG42665 | P{TRIP.HMS00246}attP2  |
| 28041  | exo70      | FBgn0266667 | CG7127  | P{TRIP.JF02876}attP2   |
| 28712  | exo84      | FBgn0266668 | CG6095  | P{TRIP.JF03139}attP2   |
| 32347  | Exp6       | FBgn0266572 | CG3923  | P{TRIP.HMS00338}attP2  |
| 52883  | Ext2       | FBgn0029175 | CG8433  | P{TRIP.HMC03621}attP40 |
| 28902  | exu        | FBgn0000615 | CG8994  | P{TRIP.HM05112}attP2   |
| 32486  | ey         | FBgn0005558 | CG1464  | P{TRIP.HMS00489}attP2  |
| 28733  | eya        | FBgn0000320 | CG9554  | P{TRIP.JF03160}attP2   |
| 26226  | eyg        | FBgn0000625 | CG10488 | P{TRIP.JF02124}attP2   |
| 33766  | eys        | FBgn0031414 | CG33955 | P{TRIP.JF02708}attP2   |
| 41687  | f          | FBgn0262111 | CG42864 | P{TRIP.HMS02251}attP2  |
| 36120  | f-cup      | FBgn0028487 | CG9611  | VDR.C.36120            |
| 50925  | fa2h       | FBgn0050502 | CG30502 | P{TRIP.HMJ21019}attP40 |
| 110538 | fa2h       | FBgn0050502 | CG30502 | VDR.C.110538           |
| 51796  | Faa        | FBgn0016013 | CG14993 | P{TRIP.HMC03352}attP40 |
| 43031  | Faa        | FBgn0016013 | CG14993 | VDR.C.43031            |
| 35793  | fab1       | FBgn0028741 | CG6355  | P{TRIP.GL00246}attP2   |
| 27591  | fab1       | FBgn0028741 | CG6355  | VDR.C.27591            |
| 34685  | fabp       | FBgn0037913 | CG6783  | P{TRIP.HMS01163}attP2  |
| 7492   | Fad2       | FBgn0029172 | CG7923  | VDR.C.7492             |
| 35728  | faf        | FBgn0005632 | CG1945  | P{TRIP.HMS01470}attP2  |
| 43224  | Faf        | FBgn0025608 | CG10372 | P{TRIP.GL01569}attP40  |
| 44075  | Fak        | FBgn0020440 | CG10023 | P{TRIP.HMS02792}attP40 |
| 33617  | Fak        | FBgn0020440 | CG10023 | P{TRIP.HMS00010}attP2  |
| 31139  | fal        | FBgn0028380 | CG9670  | P{TRIP.JF01614}attP2   |



|         |             |             |         |                         |
|---------|-------------|-------------|---------|-------------------------|
| 41891   | fal         | FBgn0028380 | CG9670  | P(TRIP.GL01306)attP40   |
| 28044   | fan         | FBgn0028379 | CG7919  | P(TRIP.JF02879)attP2    |
| 53329   | Fancd2      | FBgn0038827 | CG17269 | P(TRIP.HMC03558)attP40  |
| 56141   | Fancd2      | FBgn0038827 | CG17269 | P(TRIP.HMC04180)attP2   |
| 32972   | FANCI       | FBgn0033354 | CG13745 | P(TRIP.HMS00769)attP2   |
| 33050   | Fancl       | FBgn0037781 | CG12812 | P(TRIP.HMS00771)attP2   |
| 41854   | Fas1        | FBgn0285925 | CG6588  | P(TRIP.GL01282)attP2    |
| 42887   | Fas1        | FBgn0285925 | CG6588  | P(TRIP.HMS02580)attP40  |
| 34084   | Fas2        | FBgn0000635 | CG3665  | P(TRIP.HMS01098)attP2   |
| 26850   | Fas3        | FBgn0000636 | CG5803  | VDRC.26850              |
| 50629   | fat-spondin | FBgn0026721 | CG6953  | P(TRIP.HMC02996)attP2   |
| 50709   | Fatp        | FBgn0267828 | CG46149 | P(TRIP.HMC03111)attP2   |
| 33687   | fax         | FBgn0014163 | CG4609  | P(TRIP.HMS00555)attP2   |
| 35259   | fbl         | FBgn0011205 | CG5725  | P(TRIP.GL00149)attP2    |
| 31482   | fbl6        | FBgn0033609 | CG13213 | P(TRIP.JF01318)attP2    |
| 51871   | fbp         | FBgn0032820 | CG31692 | P(TRIP.HMC03445)attP40  |
| 37881   | Fbp1        | FBgn0000639 | CG17285 | VDRC.37881              |
| 44052   | Fbp2        | FBgn0000640 | CG3763  | P(TRIP.HMS02769)attP40  |
| 31356   | Fbw5        | FBgn0031773 | CG9144  | P(TRIP.JF01314)attP2    |
| 31484   | FBX011      | FBgn0037760 | CG9461  | P(TRIP.HMC01324)attP2   |
| 31363   | Fbxl4       | FBgn0030555 | CG1839  | P(TRIP.JF01323)attP2    |
| 32925   | Fcp1        | FBgn0035026 | CG12252 | P(TRIP.HMS00716)attP2   |
| 26355   | Fcp3C       | FBgn0000644 | CG4015  | VDRC.26355              |
| 44045   | fd102C      | FBgn0039937 | CG11152 | P(TRIP.HMS02761)attP2   |
| 31937   | fd59A       | FBgn0004896 | CG3668  | P(TRIP.JF02228)attP2    |
| 30553   | fd64A       | FBgn0004895 | CG1132  | VDRC.30553              |
| 27994   | fd68A       | FBgn0036134 | CG11799 | P(TRIP.JF02827)attP2    |
| 100261  | fd96Ca      | FBgn0004897 | CG11921 | VDRC.100261             |
| 26761   | fd96Cb      | FBgn0004898 | CG11922 | P(TRIP.JF02325)attP2    |
| 34937   | Fdh         | FBgn0011768 | CG6598  | P(TRIP.HMS01268)attP2   |
| 28298   | fdl         | FBgn0045063 | CG8824  | P(TRIP.JF02928)attP2    |
| 24497   | Fdxh        | FBgn0011769 | CG4205  | VDRC.24497              |
| 55146   | FeCH        | FBgn0266268 | CG2098  | P(TRIP.HMC03757)attP40  |
| 44428   | Fem-1       | FBgn0034542 | CG9025  | VDRC.44428              |
| 35764   | Fen1        | FBgn0025832 | CG8648  | P(TRIP.HMS01512)attP2   |
| 28926   | feo         | FBgn0030241 | CG11207 | P(TRIP.HM05137)attP2    |
| 35467   | feo         | FBgn0030241 | CG11207 | P(TRIP.GL00393)attP2    |
| 27737   | Fer1        | FBgn0037475 | CG33323 | P(TRIP.JF02821)attP2    |
| 49536   | Fer1HCH     | FBgn0015222 | CG2216  | VDRC.49536              |
| 28697   | Fer2        | FBgn0038402 | CG5952  | P(TRIP.JF03113)attP2    |
| 44067   | Fer2LCH     | FBgn0015221 | CG1469  | P(TRIP.HMS02784)attP40  |
| 25974   | Fer3        | FBgn0037937 | CG6913  | P(TRIP.HMC01996)attP2   |
| 51825   | Fer3HCH     | FBgn0030449 | CG4349  | P(TRIP.HMC03397)attP2   |
| 31212   | fh          | FBgn0030092 | CG8971  | P(TRIP.JF01731)attP2    |
| 31400   | Fhos        | FBgn0266084 | CG42610 | P(TRIP.JF01606)attP2    |
| 42553   | Fib         | FBgn0003062 | CG9888  | P(TRIP.HM.J02126)attP40 |
| 55229   | Fibp        | FBgn0036911 | CG8660  | P(TRIP.GLC01846)attP2   |
| 1451    | Fic         | FBgn0263278 | CG9523  | VDRC.1451               |
| 7477    | Fie         | FBgn0026592 | CG1079  | VDRC.7477               |
| 103267  | Fife        | FBgn0264606 | CG43955 | VDRC.103267             |
| 47312   | fig         | FBgn0039694 | CG7615  | VDRC.47312              |
| 28568   | Fili        | FBgn0085397 | CG34368 | P(TRIP.HM05054)attP2    |
| 33977   | Fim         | FBgn0024238 | CG8649  | P(TRIP.HMS00937)attP2   |
| 27317   | Fip1        | FBgn0037255 | CG1078  | VDRC.27317              |
| 14433   | fit         | FBgn0038914 | CG17820 | VDRC.14433              |
| 25966   | Fit1        | FBgn0035498 | CG14991 | P(TRIP.JF01986)attP2    |
| 44536   | Fit1        | FBgn0035498 | CG14991 | P(TRIP.HMC02930)attP40  |
| 41941   | Fit2        | FBgn0036688 | CG7729  | P(TRIP.HMS02338)attP40  |
| 34323   | fj          | FBgn0000658 | CG10917 | P(TRIP.HMS01310)attP2   |
| 32348   | FK506-bp1   | FBgn0013269 | CG6226  | P(TRIP.HMS00339)attP2   |
| 58245   | FK506-bp2   | FBgn0013954 | CG11001 | P(TRIP.HM.J22266)attP40 |
| 39071   | Fkbp14      | FBgn0010470 | CG9847  | VDRC.39071              |
| 28349   | FKBP59      | FBgn0029174 | CG4535  | P(TRIP.JF02985)attP2    |
| 33760   | fkh         | FBgn0000659 | CG10002 | P(TRIP.HMS01103)attP2   |
| 27578   | fl(2)d      | FBgn0000662 | CG6315  | VDRC.27578              |
| 55674   | fl(2)d      | FBgn0000662 | CG6315  | P(TRIP.HMC03833)attP40  |
| F001352 | fl(2)d      | FBgn0000662 | CG6315  | UAS-fl(2)d.ORF.ZH-86Fb  |
| 21901   | FLASH       | FBgn0033806 | CG4616  | VDRC.21901              |

|        |              |             |         |                        |
|--------|--------------|-------------|---------|------------------------|
| 33374  | flf          | FBgn0024555 | CG9351  | P{TRIP.HMS00247}attP2  |
| 27566  | flil         | FBgn0000709 | CG1484  | P{TRIP.JF02720}attP2   |
| 40833  | Flo-2        | FBgn0264078 | CG32593 | P{TRIP.HMS01999}attP40 |
| 36700  | Flo1         | FBgn0024754 | CG8200  | P{TRIP.HMS01589}attP2  |
| 31145  | flr          | FBgn0260049 | CG10724 | P{TRIP.JF01620}attP2   |
| 38336  | flw          | FBgn0000711 | CG2096  | P{TRIP.HMS01803}attP2  |
| 57022  | flw          | FBgn0000711 | CG2096  | P{TRIP.HMS04465}attP40 |
| 23702  | flw          | FBgn0000711 | CG2096  | P{UAS-flw.HA}3         |
| 34944  | Fmr1         | FBgn0028734 | CG6203  | P{TRIP.HMS00248}attP2  |
| 25870  | Fmrf         | FBgn0000715 | CG2346  | P{TRIP.JF01909}attP2   |
| 28784  | fne          | FBgn0086675 | CG4396  | P{TRIP.JF03212}attP2   |
| 25947  | fng          | FBgn0011591 | CG10580 | P{TRIP.JF01967}attP2   |
| 36790  | fog          | FBgn0000719 | CG9559  | P{TRIP.GL00529}attP2   |
| 55281  | foi          | FBgn0024236 | CG6817  | P{TRIP.HMC03968}attP40 |
| 105596 | fok          | FBgn0263773 | CG43690 | VDRC.105596            |
| 31698  | for          | FBgn0000721 | CG10033 | P{TRIP.JF01449}attP2   |
| 35158  | for          | FBgn0000721 | CG10033 | P{TRIP.GL00026}attP2   |
| 32398  | form3        | FBgn0053556 | CG33556 | P{TRIP.HMS00393}attP2  |
| 32993  | foxo         | FBgn0038197 | CG3143  | P{TRIP.HMS00793}attP2  |
| 26774  | FoxP         | FBgn0262477 | CG43067 | P{TRIP.JF02338}attP2   |
| 104362 | Fpps         | FBgn0025373 | CG12389 | VDRC.104362            |
| 33375  | Fps85D       | FBgn0000723 | CG8874  | P{TRIP.HMS00249}attP2  |
| 25858  | FR           | FBgn0035385 | CG2114  | P{TRIP.JF01879}attP2   |
| 40826  | fra          | FBgn0011592 | CG8581  | P{TRIP.HMS01147}attP2  |
| 42569  | fray         | FBgn0023083 | CG7693  | P{TRIP.HMJ02228}attP40 |
| 42007  | frc          | FBgn0042641 | CG3874  | P{TRIP.HMS02408}attP40 |
| 42621  | fred         | FBgn0051774 | CG31774 | P{TRIP.HMS02456}attP2  |
| 43169  | frj          | FBgn0031815 | CG9526  | P{TRIP.GL01511}attP2   |
| 27696  | Frq1         | FBgn0030897 | CG5744  | P{TRIP.JF02776}attP2   |
| 28711  | Frq2         | FBgn0083228 | CG5907  | P{TRIP.JF03138}attP2   |
| 55649  | frtz         | FBgn0086698 | CG17657 | P{TRIP.HMC03798}attP40 |
| 31593  | fru          | FBgn0004652 | CG14307 | P{TRIP.JF01182}attP2   |
| 40309  | fry          | FBgn0016081 | CG32045 | VDRC.40309             |
| 41943  | fs(1)h       | FBgn0004656 | CG2252  | P{TRIP.HMS02340}attP40 |
| 33008  | fs(1)K10     | FBgn0000810 | CG3218  | P{TRIP.HMS00808}attP2  |
| 14413  | fs(1)M3      | FBgn0005390 | CG4790  | VDRC.14413             |
| 35301  | fs(1)Yb      | FBgn0000928 | CG2706  | P{TRIP.GL00204}attP2   |
| 27567  | Fs(2)Ket     | FBgn0262743 | CG2637  | P{TRIP.JF02721}attP2   |
| 41845  | Fs(2)Ket     | FBgn0262743 | CG2637  | P{TRIP.GL01273}attP2   |
| 32452  | fs(2)ItoPP43 | FBgn0004811 | CG10528 | P{TRIP.HMS00451}attP2  |
| 31060  | fsd          | FBgn0033813 | CG12765 | P{TRIP.JF01509}attP2   |
| 31096  | Fsn          | FBgn0043010 | CG4643  | P{TRIP.JF01561}attP2   |
| 33376  | Fst          | FBgn0037724 | CG9434  | P{TRIP.HMS00250}attP2  |
| 34970  | ft           | FBgn0001075 | CG3352  | P{TRIP.HMS00932}attP2  |
| 33761  | ftz          | FBgn0001077 | CG2047  | P{TRIP.HMS01104}attP2  |
| 33625  | ftz-f1       | FBgn0001078 | CG4059  | P{TRIP.HMS00019}attP2  |
| 31495  | fu           | FBgn0001079 | CG6551  | P{TRIP.JF01579}attP2   |
| 41588  | fu           | FBgn0001079 | CG6551  | P{TRIP.GL00705}attP40  |
| 51079  | fu12         | FBgn0026718 | CG17608 | VDRC.51079             |
| 28554  | fu2          | FBgn0285971 | CG9233  | P{TRIP.HM05040}attP2   |
| 43210  | Fuca         | FBgn0285958 | CG6128  | P{TRIP.GL01555}attP40  |
| 109432 | FucT6        | FBgn0030327 | CG2448  | VDRC.109432            |
| 51715  | FucTA        | FBgn0036485 | CG6869  | P{TRIP.HMC03247}attP2  |
| 40519  | FucTB        | FBgn0032117 | CG4435  | VDRC.40519             |
| 44540  | FucTC        | FBgn0044872 | CG40305 | P{TRIP.HMC02935}attP40 |
| 27008  | FucTD        | FBgn0035217 | CG9169  | VDRC.27008             |
| 41914  | Fur1         | FBgn0004509 | CG10772 | P{TRIP.HMS02311}attP2  |
| 42577  | Fur2         | FBgn0004598 | CG18734 | P{TRIP.HMJ02236}attP40 |
| 107575 | fus          | FBgn0023441 | CG8205  | VDRC.107575            |
| 44220  | fusl         | FBgn0031702 | CG14021 | VDRC.44220             |
| 40834  | futsch       | FBgn0259108 | CG34387 | P{TRIP.HMS02000}attP40 |
| 38975  | fw           | FBgn0001083 | CG1500  | P{TRIP.HMS01891}attP40 |
| 29396  | fwd          | FBgn0004373 | CG7004  | P{TRIP.JF03329}attP2   |
| 27323  | fwe          | FBgn0261722 | CG6151  | P{TRIP.JF02632}attP2   |
| 30757  | fy           | FBgn0001084 | CG13396 | VDRC.30757             |
| 34321  | fz           | FBgn0001085 | CG17697 | P{TRIP.HMS01308}attP2  |
| 27568  | fz2          | FBgn0016797 | CG9739  | P{TRIP.JF02722}attP2   |
| 44468  | fz3          | FBgn0027343 | CG16785 | P{TRIP.GLC01626}attP2  |

|        |              |             |         |                         |
|--------|--------------|-------------|---------|-------------------------|
| 1405   | fzo          | FBgn0011596 | CG4568  | VDRC.1405               |
| 106072 | fzo          | FBgn0011596 | CG4568  | VDRC.106072             |
| 38223  | fzr2         | FBgn0034937 | CG16783 | P(TRIP.GL00664)attP2    |
| 42503  | fzy          | FBgn0001086 | CG4274  | P(TRIP.HM.J02068)attP40 |
| 34653  | G-coalpha47A | FBgn0001122 | CG2204  | P(TRIP.HMS01129)attP2   |
| 34817  | G9a          | FBgn0040372 | CG2995  | P(TRIP.HMS00127)attP2   |
| 28353  | GABA-B-R1    | FBgn0260446 | CG15274 | P(TRIP.JF02989)attP2    |
| 27699  | GABA-B-R2    | FBgn0027575 | CG6706  | P(TRIP.JF02779)attP2    |
| 26729  | GABA-B-R3    | FBgn0031275 | CG3022  | P(TRIP.JF02271)attP2    |
| 27028  | GABPI        | FBgn0031495 | CG17257 | P(TRIP.JF02349)attP2    |
| 28079  | Gad1         | FBgn0004516 | CG14994 | P(TRIP.JF02916)attP2    |
| 33011  | Gadd34       | FBgn0034948 | CG3825  | P(TRIP.HMS00811)attP2   |
| 35023  | Gadd45       | FBgn0033153 | CG11086 | P(TRIP.HMS01436)attP2   |
| 50680  | Gal          | FBgn0001089 | CG9092  | P(TRIP.HMC03081)attP2   |
| 44496  | Gale         | FBgn0035147 | CG12030 | P(TRIP.HMC02429)attP2   |
| 34880  | galectin     | FBgn0031213 | CG11372 | P(TRIP.HMS01225)attP2   |
| 35356  | Galk         | FBgn0263199 | CG5288  | P(TRIP.GL00268)attP2    |
| 37174  | GalNAc-T1    | FBgn0034025 | CG8182  | VDRC.37174              |
| 105160 | GalNAc-T2    | FBgn0030930 | CG6394  | VDRC.105160             |
| 36775  | Galpha49B    | FBgn0004435 | CG17759 | P(TRIP.JF02390)attP2    |
| 25930  | Galphaf      | FBgn0010223 | CG12232 | P(TRIP.JF01950)attP2    |
| 43201  | Galphaf      | FBgn0010223 | CG12232 | P(TRIP.GL01545)attP40   |
| 40890  | Galphai      | FBgn0001104 | CG10060 | P(TRIP.HMS02138)attP40  |
| 50704  | Galphas      | FBgn0001123 | CG2835  | P(TRIP.HMC03106)attP2   |
| 29576  | Galphas      | FBgn0001123 | CG2835  | P(TRIP.JF03255)attP2    |
| 55191  | Galt         | FBgn0263200 | CG9232  | P(TRIP.HMC03885)attP40  |
| 28889  | gammaCop     | FBgn0028968 | CG1528  | P(TRIP.HM05099)attP2    |
| 28707  | gammaSnap    | FBgn0028552 | CG3988  | P(TRIP.JF03124)attP2    |
| 42799  | gammaTub23C  | FBgn0260639 | CG3157  | P(TRIP.GL01171)attP2    |
| 31204  | gammaTub23C  | FBgn0260639 | CG3157  | P(TRIP.JF01722)attP2    |
| 32513  | gammaTub37C  | FBgn0010097 | CG17566 | P(TRIP.HMS00517)attP2   |
| 31769  | Gap1         | FBgn0004390 | CG6721  | P(TRIP.HM04082)attP2    |
| 41830  | Gap1         | FBgn0004390 | CG6721  | P(TRIP.GL01258)attP2    |
| 36842  | Gapdh1       | FBgn0001091 | CG12055 | P(TRIP.GL01094)attP2    |
| 26302  | Gapdh2       | FBgn0001092 | CG8893  | P(TRIP.JF02072)attP2    |
| 34987  | garz         | FBgn0264560 | CG8487  | P(TRIP.HMS01397)attP2   |
| 31807  | Gas8         | FBgn0029667 | CG14271 | VDRC.31807              |
| 50553  | gatA         | FBgn0260779 | CG6007  | P(TRIP.GLC01673)attP2   |
| 34640  | GATAd        | FBgn0032223 | CG5034  | P(TRIP.HMS01115)attP2   |
| 34907  | GAT Ae       | FBgn0038391 | CG10278 | P(TRIP.HMS01253)attP2   |
| 1261   | gb           | FBgn0039487 | CG6070  | VDRC.1261               |
| 34898  | gbb          | FBgn0024234 | CG5562  | P(TRIP.HMS01243)attP2   |
| 35041  | Gbeta13F     | FBgn0001105 | CG10545 | P(TRIP.HMS01455)attP2   |
| 31134  | Gbeta13F     | FBgn0001105 | CG10545 | P(TRIP.JF01609)attP2    |
| 28310  | Gbeta5       | FBgn0030011 | CG10763 | P(TRIP.JF02941)attP2    |
| 28507  | Gbeta76C     | FBgn0004623 | CG8770  | P(TRIP.JF03127)attP2    |
| 41438  | Gbp          | FBgn0034199 | CG15917 | VDRC.41438              |
| 42551  | Gbs-76A      | FBgn0036862 | CG9619  | P(TRIP.HM.J02124)attP40 |
| 51897  | GC           | FBgn0035245 | CG13927 | P(TRIP.HMC03471)attP40  |
| 35486  | GCC88        | FBgn0037881 | CG10703 | VDRC.35486              |
| 26323  | gce          | FBgn0261703 | CG42739 | P(TRIP.JF02097)attP2    |
| 31744  | GckII        | FBgn0266465 | CG5169  | P(TRIP.HM04054)attP2    |
| 41596  | GckIII       | FBgn0266465 | CG5169  | P(TRIP.GL01132)attP2    |
| 34608  | gcl          | FBgn0005695 | CG8411  | P(TRIP.HMS00602)attP2   |
| 33512  | Gclc         | FBgn0040319 | CG2259  | VDRC.33512              |
| 108737 | Gclm         | FBgn0046114 | CG4919  | VDRC.108737             |
| 58075  | Gclm         | FBgn0046114 | CG4919  | P(TRIP.HM.J21967)attP40 |
| 28913  | gcm          | FBgn0014179 | CG12245 | P(TRIP.HM05124)attP2    |
| 34597  | gcm2         | FBgn0019809 | CG3858  | P(TRIP.HMS01071)attP2   |
| 35355  | Gcn2         | FBgn0019990 | CG1609  | P(TRIP.GL00267)attP2    |
| 14892  | gd           | FBgn0000808 | CG1505  | VDRC.14892              |
| 51473  | Gdh          | FBgn0001098 | CG5320  | P(TRIP.HMC03217)attP40  |
| 53255  | Gdh          | FBgn0001098 | CG5320  | P(TRIP.GLC01815)attP2   |
| 27309  | Gdi          | FBgn0004868 | CG4422  | P(TRIP.JF02617)attP2    |
| 36603  | Gdi          | FBgn0004868 | CG4422  | P(TRIP.GL00563)attP2    |
| 32349  | Ge-1         | FBgn0283682 | CG6181  | P(TRIP.HMS00340)attP2   |
| 28928  | Gef26        | FBgn0265778 | CG9491  | P(TRIP.HM05139)attP2    |
| 31130  | Gef64C       | FBgn0035574 | CG32239 | P(TRIP.JF01604)attP2    |

|        |            |             |         |                         |
|--------|------------|-------------|---------|-------------------------|
| 42545  | GEFmeso    | FBgn0050115 | CG30115 | P{TRiP.HM.J02116}attP40 |
| 35796  | gek        | FBgn0023081 | CG4012  | P{TRiP.GL00299}attP2    |
| 41704  | Gel        | FBgn0010225 | CG1106  | P{TRiP.HMS02269}attP2   |
| 40934  | gem        | FBgn0050011 | CG30011 | P{TRiP.HMS02182}attP40  |
| 34366  | Gem2       | FBgn0036850 | CG10419 | P{TRiP.HMS01355}attP2   |
| 33408  | Gem3       | FBgn0011802 | CG6539  | P{TRiP.HMS00287}attP2   |
| 35673  | geminin    | FBgn0033081 | CG3183  | P{TRiP.GLV21038}attP2   |
| 41869  | geminin    | FBgn0033081 | CG3183  | P{TRiP.GL01299}attP40   |
| 42787  | Gen        | FBgn0263831 | CG10670 | P{TRiP.GL01157}attP2    |
| 27251  | gfA        | FBgn0086778 | CG32538 | P{TRiP.JF02570}attP2    |
| 42892  | Gfat1      | FBgn0027341 | CG12449 | P{TRiP.HMS02585}attP40  |
| 24539  | Gfat1      | FBgn0027341 | CG12449 | VDRC.24539              |
| 34740  | Gfat2      | FBgn0039580 | CG1345  | P{TRiP.HMS01220}attP2   |
| 51505  | Gfri       | FBgn0262869 | CG43224 | P{TRiP.HMC03267}attP2   |
| 32399  | gfzf       | FBgn0250732 | CG33546 | P{TRiP.HMS00394}attP2   |
| 36905  | Gga        | FBgn0030141 | CG3002  | P{TRiP.GL01106}attP2    |
| 34372  | Ggamma1    | FBgn0004921 | CG8261  | P{TRiP.HMS01361}attP2   |
| 11686  | ghi        | FBgn0266124 | CG32038 | VDRC.11686              |
| 26085  | Gie        | FBgn0037551 | CG7891  | VDRC.26085              |
| 34737  | gig        | FBgn0005198 | CG6975  | P{TRiP.HMS01217}attP2   |
| 36757  | Gllspla2   | FBgn0030013 | CG1583  | P{TRiP.HMS03017}attP2   |
| 31118  | Gllspla2   | FBgn0030013 | CG1583  | P{TRiP.JF01591}attP2    |
| 38998  | Gint3      | FBgn0034372 | CG5469  | VDRC.38998              |
| 32008  | Girdin     | FBgn0035411 | CG12734 | VDRC.32008              |
| 36719  | qish       | FBgn0250823 | CG6963  | P{TRiP.HMS01609}attP2   |
| 31583  | Git        | FBgn0033539 | CG16728 | P{TRiP.JF01156}attP2    |
| 35164  | Gk2        | FBgn0035266 | CG7995  | P{TRiP.GL00032}attP2    |
| 22652  | Gk2        | FBgn0035266 | CG7995  | VDRC.22652              |
| 49301  | gkt        | FBgn0260817 | CG8825  | VDRC.49301              |
| 109757 | gkt        | FBgn0260817 | CG8825  | VDRC.109757             |
| 26780  | gl         | FBgn0004618 | CG7672  | P{TRiP.JF02344}attP2    |
| 27721  | Gl         | FBgn0001108 | CG9206  | P{TRiP.JF02803}attP2    |
| 15387  | GLaz       | FBgn0033799 | CG4604  | VDRC.15387              |
| 34946  | GlcAT-I    | FBgn0066114 | CG32775 | P{TRiP.HMS00289}attP2   |
| 42779  | GlcAT-S    | FBgn0032135 | CG3881  | VDRC.42779              |
| 38040  | Gld        | FBgn0001112 | CG1152  | VDRC.38040              |
| 14431  | glec       | FBgn0015229 | CG6575  | VDRC.14431              |
| 38284  | Gli        | FBgn0001987 | CG3903  | P{TRiP.HMS01737}attP40  |
| 33668  | glo        | FBgn0259139 | CG6946  | P{TRiP.HMS00079}attP2   |
| 36668  | glob1      | FBgn0027657 | CG9734  | P{TRiP.HMS01556}attP40  |
| 36693  | glob2      | FBgn0250846 | CG15180 | P{TRiP.HMS01582}attP2   |
| 36670  | glob3      | FBgn0037385 | CG14675 | P{TRiP.HMS01558}attP2   |
| 55929  | Git        | FBgn0001114 | CG9280  | P{TRiP.HMC04217}attP40  |
| 32350  | glu        | FBgn0015391 | CG11397 | P{TRiP.HMS00341}attP2   |
| 40907  | Glu-RI     | FBgn0004619 | CG8442  | P{TRiP.HMS02155}attP2   |
| 41985  | Glu-RIB    | FBgn0264000 | CG43743 | P{TRiP.HMS02383}attP2   |
| 40908  | Glu-RiB    | FBgn0264000 | CG43743 | P{TRiP.HMS02156}attP40  |
| 53356  | GluC1alpha | FBgn0024963 | CG7535  | P{TRiP.HMC03585}attP40  |
| 27497  | GluRIIA    | FBgn0004620 | CG6992  | P{TRiP.JF02647}attP2    |
| 28718  | GluRIIB    | FBgn0020429 | CG7234  | P{TRiP.JF03145}attP2    |
| 25836  | GluRIIC    | FBgn0046113 | CG4226  | P{TRiP.JF01854}attP2    |
| 25942  | GluRIIE    | FBgn0051201 | CG31201 | P{TRiP.JF01962}attP2    |
| 40904  | Glut1      | FBgn0264574 | CG43946 | P{TRiP.HMS02152}attP40  |
| 35664  | Glut4EF    | FBgn0263097 | CG34360 | VDRC.35664              |
| 42565  | Glycogenin | FBgn0265191 | CG44244 | P{TRiP.HM.J02222}attP40 |
| 33634  | GlyP       | FBgn0004507 | CG7254  | P{TRiP.HMS00032}attP2   |
| 50956  | GlyS       | FBgn0266064 | CG6904  | P{TRiP.HM.J21058}attP40 |
| 34930  | GlyS       | FBgn0266064 | CG6904  | P{TRiP.HMS01279}attP2   |
| 53966  | GM130      | FBgn0034697 | CG11061 | P{TRiP.HM.J21349}attP40 |
| 38441  | GM130      | FBgn0034697 | CG11061 | VDRC.38441              |
| 50008  | Gmap       | FBgn0027287 | CG33206 | VDRC.50008              |
| 53912  | Gmd        | FBgn0031661 | CG8890  | P{TRiP.HM.J21245}attP40 |
| 42884  | Gmer       | FBgn0267823 | CG3495  | P{TRiP.HMS02577}attP40  |
| 16463  | GNBP1      | FBgn0040323 | CG6895  | VDRC.16463              |
| 37882  | GNBP2      | FBgn0040322 | CG4144  | VDRC.37882              |
| 37255  | GNBP3      | FBgn0040321 | CG5008  | VDRC.37255              |
| 35423  | Gnf1       | FBgn0004913 | CG1119  | P{TRiP.GL00346}attP2    |
| 51704  | gnu        | FBgn0001120 | CG5272  | P{TRiP.HMC03188}attP2   |

|        |           |             |         |                        |
|--------|-----------|-------------|---------|------------------------|
| 51865  | gny       | FBgn0032234 | CG5091  | P(TRIP.HMC03439)attP40 |
| 28785  | gol       | FBgn0004919 | CG2679  | P(TRIP.JF03213)attP2   |
| 40450  | Golgin245 | FBgn0034854 | CG3493  | VDRC.40450             |
| 39039  | Golgin84  | FBgn0039188 | CG17785 | P(TRIP.HMS01959)attP40 |
| 44913  | gom       | FBgn0029084 | CG6727  | VDRC.44913             |
| 34724  | Gos28     | FBgn0044871 | CG7700  | P(TRIP.HMS01203)attP2  |
| 36768  | Got1      | FBgn0001124 | CG8430  | P(TRIP.HMS03029)attP2  |
| 26452  | Got2      | FBgn0001125 | CG4233  | VDRC.26452             |
| 32400  | Gp150     | FBgn0013272 | CG5820  | P(TRIP.HMS00395)attP2  |
| 34346  | Gp93      | FBgn0039562 | CG5520  | P(TRIP.HMS01334)attP2  |
| 51474  | Gpdh      | FBgn0001128 | CG9042  | P(TRIP.HMC03218)attP40 |
| 44466  | Gpi1      | FBgn0086448 | CG32578 | P(TRIP.GL01623)attP2   |
| 55319  | Gpo-1     | FBgn0022160 | CG8256  | P(TRIP.HMC04006)attP40 |
| 42556  | gpp       | FBgn0264495 | CG42803 | P(TRIP.HMJ02129)attP40 |
| 28354  | Gprk1     | FBgn0260798 | CG40129 | P(TRIP.JF02990)attP2   |
| 41933  | Gprk2     | FBgn0261988 | CG17998 | P(TRIP.HMS02330)attP40 |
| 35326  | Gprk2     | FBgn0261988 | CG17998 | P(TRIP.GL00233)attP2   |
|        | Gprk2     | FBgn0261988 | CG17998 | UAS-Gprk2              |
| 42630  | gprs      | FBgn0024232 | CG18471 | P(TRIP.HMS02465)attP40 |
| 31281  | Gr21a     | FBgn0041250 | CG13948 | P(TRIP.JF01222)attP2   |
| 38248  | Gr22d     | FBgn0045498 | CG31930 | P(TRIP.HMS01692)attP40 |
| 36738  | Gr57a     | FBgn0041240 | CG13441 | P(TRIP.HMS01629)attP40 |
| 25815  | Gr59e     | FBgn0041233 | CG33151 | P(TRIP.JF01833)attP2   |
| 31283  | Gr5a      | FBgn0030747 | CG15779 | P(TRIP.JF01224)attP2   |
| 36734  | Gr64b     | FBgn0045478 | CG32257 | P(TRIP.HMS01625)attP40 |
| 36734  | Gr64c     | FBgn0045477 | CG32256 | P(TRIP.HMS01625)attP40 |
| 37497  | Gr64d     | FBgn0035486 | CG14987 | P(TRIP.HMS01639)attP40 |
| 37497  | Gr64e     | FBgn0045476 | CG32258 | P(TRIP.HMS01639)attP40 |
| 31658  | Gr66a     | FBgn0035870 | CG7189  | P(TRIP.JF01451)attP2   |
| 38236  | Gr77a     | FBgn0045474 | CG32433 | P(TRIP.HMS01680)attP40 |
| 36735  | Gr98c     | FBgn0046886 | CG31060 | P(TRIP.HMS01626)attP40 |
| 31692  | Graf      | FBgn0030685 | CG8948  | P(TRIP.JF02140)attP2   |
| 34082  | Grasp65   | FBgn0036919 | CG7809  | P(TRIP.HMS01093)attP2  |
| 41902  | gras s    | FBgn0039494 | CG5896  | P(TRIP.GL01335)attP40  |
| 41940  | grau      | FBgn0001133 | CG33133 | P(TRIP.HMS02337)attP40 |
| 38384  | Grd       | FBgn0001134 | CG7446  | P(TRIP.HMS01853)attP40 |
| 42611  | grh       | FBgn0259211 | CG42311 | P(TRIP.HMS02446)attP40 |
| 29577  | GRHR      | FBgn0025595 | CG11325 | P(TRIP.JF03256)attP2   |
| 41978  | Grip      | FBgn0029830 | CG14447 | P(TRIP.HMS02376)attP2  |
| 29073  | Grip128   | FBgn0026433 | CG9201  | VDRC.29073             |
| 27482  | Grip163   | FBgn0026432 | CG5688  | VDRC.27482             |
| 31228  | Grip71    | FBgn0032705 | CG10346 | VDRC.31228             |
| 31215  | Grip75    | FBgn0026431 | CG6176  | P(TRIP.JF01770)attP2   |
| 33548  | Grip84    | FBgn0026430 | CG3917  | P(TRIP.HMS00627)attP2  |
| 38913  | grk       | FBgn0001137 | CG17610 | P(TRIP.GL00685)attP2   |
| 33746  | grn       | FBgn0001138 | CG9656  | P(TRIP.HMS01085)attP2  |
| 35759  | gro       | FBgn0001139 | CG8384  | P(TRIP.HMS01506)attP2  |
| 36685  | grp       | FBgn0261278 | CG17161 | P(TRIP.HMS01573)attP2  |
| 3174   | grsm      | FBgn0040493 | CG7340  | VDRC..3174             |
| 40644  | Grx-1     | FBgn0034658 | CG7975  | VDRC.40644             |
| 41657  | gry       | FBgn0035416 | CG17569 | VDRC.41657             |
| 40836  | Gs1       | FBgn0001142 | CG2718  | P(TRIP.HMS02002)attP40 |
| 29123  | Gs1l      | FBgn0019982 | CG15441 | VDRC.29123             |
| 40949  | Gs2       | FBgn0001145 | CG1743  | P(TRIP.HMS02197)attP40 |
| 29600  | gsb       | FBgn0001148 | CG3388  | P(TRIP.JF03279)attP2   |
| 28078  | gsb-n     | FBgn0001147 | CG2692  | P(TRIP.JF02915)attP2   |
| 50894  | Gsc       | FBgn0010323 | CG2851  | P(TRIP.HMC02397)attP2  |
| 25640  | gskt      | FBgn0046332 | CG31003 | VDRC.25640             |
| 107429 | gskt      | FBgn0046332 | CG31003 | VDRC.107429            |
| 55150  | GSS       | FBgn0030882 | CG6835  | P(TRIP.HMC03776)attP40 |
| 36818  | GsID1     | FBgn0001149 | CG10045 | P(TRIP.GL01039)attP2   |
| 42842  | GsID5     | FBgn0010041 | CG12242 | P(TRIP.HMS02534)attP40 |
| 36878  | GsIE1     | FBgn0034335 | CG5164  | P(TRIP.GL01040)attP2   |
| 54836  | GsIE14    | FBgn0033817 | CG4688  | P(TRIP.HMJ21555)attP40 |
| 28885  | GsIS1     | FBgn0010226 | CG8938  | P(TRIP.HM05063)attP2   |
| 41645  | GsIT1     | FBgn0050000 | CG30000 | P(TRIP.GL01227)attP2   |
| 36717  | GsIT4     | FBgn0030484 | CG1681  | P(TRIP.HMS01607)attP40 |
| 53280  | GsIZ1     | FBgn0037696 | CG9362  | P(TRIP.HMC03496)attP40 |

|        |             |              |         |                        |
|--------|-------------|--------------|---------|------------------------|
| 55634  | GstZ2       | FBgn0037697  | CG9363  | P(TRIP.HMC03781)attP40 |
| 34631  | gt          | FBgn0001150  | CG7952  | P(TRIP.HMS01105)attP2  |
| 32961  | Gug         | FBgn0010825  | CG6964  | P(TRIP.HMS00756)attP2  |
| 42486  | gukh        | FBgn0026239  | CG31043 | P(TRIP.GL01345)attP40  |
| 8688   | gus         | FBgn0026238  | CG2944  | VDRC.8688              |
| 34796  | gw          | FBgn0051992  | CG31992 | P(TRIP.HMS00105)attP2  |
| 34525  | gwl         | FBgn00260399 | CG7719  | P(TRIP.HMS00834)attP2  |
| 35212  | gwl         | FBgn00260399 | CG7719  | P(TRIP.GL00091)attP2   |
| 33961  | GXIVsPLA2   | FBgn0036545  | CG17035 | P(TRIP.HMS00918)attP2  |
| 30502  | Gyc-89Da    | FBgn0038435  | CG14885 | P(TRIP.HM05246)attP2   |
| 29529  | Gyc-89Db    | FBgn0038436  | CG14886 | P(TRIP.HM05207)attP2   |
| 28660  | Gyc76C      | FBgn0266136  | CG42636 | P(TRIP.JF03075)attP2   |
| 57315  | Gyc76C      | FBgn0266136  | CG42636 | P(TRIP.HMS04516)attP40 |
| 28608  | Gyc88E      | FBgn0038295  | CG4154  | P(TRIP.HM05096)attP2   |
| 28748  | Gycalpha99B | FBgn0013972  | CG1912  | P(TRIP.JF03176)attP2   |
| 28786  | Gycbeta100B | FBgn0013973  | CG1470  | P(TRIP.JF03214)attP2   |
| 35188  | Gyk         | FBgn0025592  | CG18374 | P(TRIP.GL00060)attP2   |
| 34326  | h           | FBgn0001168  | CG6494  | P(TRIP.HMS01313)attP2  |
| 27315  | H           | FBgn0001169  | CG5460  | P(TRIP.JF02624)attP2   |
| 34703  | H           | FBgn0001169  | CG5460  | P(TRIP.HMS01182)attP2  |
| 3189   | h-cup       | FBgn0038334  | CG6130  | VDRC.3189              |
| 28415  | H15         | FBgn0016660  | CG6604  | VDRC.28415             |
| 50690  | H2.0        | FBgn0001170  | CG11607 | P(TRIP.HMC03091)attP2  |
| 28528  | haf         | FBgn0261509  | CG14351 | P(TRIP.HMS05014)attP2  |
| 24705  | hale        | FBgn0036924  | CG7570  | VDRC.24705             |
| 32470  | ham         | FBgn0045852  | CG31753 | P(TRIP.HMS00470)attP2  |
| 21583  | hanabi      | FBgn0039553  | CG5017  | VDRC.21583             |
| 28977  | Hand        | FBgn0032209  | CG18144 | P(TRIP.HM05188)attP2   |
| 41870  | hang        | FBgn0026575  | CG32575 | P(TRIP.GL01300)attP40  |
| 35276  | Haspin      | FBgn0046706  | CG40080 | P(TRIP.GL00176)attP2   |
| 53345  | hay         | FBgn0001179  | CG8019  | P(TRIP.HMC03574)attP40 |
| 55174  | Hayan       | FBgn0030925  | CG6361  | P(TRIP.HMC03855)attP40 |
| 34704  | hb          | FBgn0001180  | CG9786  | P(TRIP.HMS01183)attP2  |
| 31906  | hbn         | FBgn0008636  | CG33152 | P(TRIP.JF02195)attP2   |
| 32453  | Hcf         | FBgn0039904  | CG1710  | P(TRIP.HMS00452)attP2  |
| 32301  | Hcs         | FBgn0037332  | CG14670 | VDRC.32301             |
| 47309  | hd          | FBgn0086695  | CG2669  | VDRC.47309             |
| 34778  | Hdac3       | FBgn0025825  | CG2128  | P(TRIP.HMS00087)attP2  |
| 34774  | HDAC4       | FBgn0041210  | CG1770  | P(TRIP.HMS00083)attP2  |
| 34072  | HDAC6       | FBgn0026428  | CG6170  | P(TRIP.HMS00077)attP2  |
| 31053  | HDAC6       | FBgn0026428  | CG6170  | P(TRIP.JF01501)attP2   |
| 32480  | HdacX       | FBgn0051119  | CG31119 | P(TRIP.HMS00483)attP2  |
| 26000  | Hdc         | FBgn0005619  | CG3454  | P(TRIP.JF02024)attP2   |
| 30489  | hdc         | FBgn0010113  | CG15532 | P(TRIP.HM05231)attP2   |
| 32563  | hdm         | FBgn0029977  | CG15329 | VDRC.32563             |
| 8055   | He          | FBgn0028430  | CG31770 | VDRC.8055              |
| 32665  | hebe        | FBgn0033448  | CG1623  | VDRC.32665             |
| 51780  | heix        | FBgn0028375  | CG5876  | P(TRIP.HMC03335)attP40 |
| 33666  | Hel25E      | FBgn0014189  | CG7269  | P(TRIP.HMS00076)attP2  |
| 32895  | Hel89B      | FBgn0022787  | CG4261  | P(TRIP.HMS00684)attP2  |
| 41688  | Hem         | FBgn0011771  | CG5837  | P(TRIP.HMS02252)attP2  |
| 33385  | Hen1        | FBgn0033686  | CG12367 | P(TRIP.HMS00262)attP2  |
| 28710  | hep         | FBgn0010303  | CG4353  | P(TRIP.JF03137)attP2   |
| 27040  | heph        | FBgn0011224  | CG31000 | P(TRIP.JF02366)attP2   |
| 27654  | Her         | FBgn0030899  | CG5927  | P(TRIP.JF02731)attP2   |
| 30560  | her         | FBgn0001185  | CG4694  | VDRC.30560             |
| 51745  | HERC2       | FBgn0031107  | CG11734 | P(TRIP.GLC01804)attP2  |
| 51773  | HERC2       | FBgn0031107  | CG11734 | P(TRIP.HMC03328)attP40 |
| 41534  | Herp        | FBgn0031950  | CG14536 | VDRC.41534             |
| 40007  | Hers        | FBgn0052529  | CG32529 | VDRC.40007             |
| 35155  | Hex-A       | FBgn0001186  | CG3001  | P(TRIP.GL00023)attP2   |
| 35337  | Hex-C       | FBgn0001187  | CG8094  | VDRC.35337             |
| 47331  | Hex-t2      | FBgn0042710  | CG32849 | VDRC.47331             |
| 102247 | Hexo1       | FBgn0041630  | CG1318  | VDRC.102247            |
| 31898  | Hey         | FBgn0027788  | CG11194 | P(TRIP.JF02186)attP2   |
| 105266 | Hf          | FBgn0014000  | CG10658 | VDRC.105266            |
| 28561  | hfw         | FBgn0001189  | CG3095  | P(TRIP.HM05047)attP2   |
| 55629  | hgo         | FBgn0040211  | CG4779  | P(TRIP.HMC03775)attP40 |

|        |                   |             |             |                        |
|--------|-------------------|-------------|-------------|------------------------|
| 29382  | HGTX              | FBgn0040318 | CG13475     | P(TRiP.JF03314)attP2   |
| 32489  | hh                | FBgn0004644 | CG4637      | P(TRiP.HMS00492)attP2  |
| 42000  | hig               | FBgn0010114 | CG2040      | P(TRiP.HMS02401)attP40 |
| 106992 | Hil               | FBgn0050147 | CG30147     | VDRC.106992            |
| 42809  | Him               | FBgn0030900 | CG15064     | P(TRiP.GL01183)attP2   |
| 54458  | HIP               | FBgn0260484 | CG32789     | P(TRiP.HMS03718)attP2  |
| 34018  | HIP-R             | FBgn0029676 | CG2947      | P(TRiP.HMS00988)attP2  |
| 38377  | Hip1              | FBgn0036309 | CG10971     | P(TRiP.HMS01846)attP40 |
| 35012  | Hip14             | FBgn0259824 | CG6017      | P(TRiP.HMS01422)attP2  |
| 35363  | hipk              | FBgn0035142 | CG17090     | P(TRiP.GL00276)attP2   |
| 35346  | Hira              | FBgn0022786 | CG12153     | P(TRiP.GL00257)attP2   |
| 35205  | His1 gene family  | FBgn0001195 |             | P(TRiP.GL00081)attP2   |
| 50723  | His1:CG31617      | FBgn0051617 | CG31617     | P(TRiP.HMS02959)attP40 |
| 35320  | His2A gene family | FBgn0001196 |             | P(TRiP.GL00226)attP2   |
| 34844  | His2Av            | FBgn0001197 | CG5499      | P(TRiP.HMS00162)attP2  |
| 41988  | His2B family      | FBgn0001198 |             | P(TRiP.HMS02387)attP40 |
| 41986  | His3 family       | FBgn0001199 |             | P(TRiP.HMS02385)attP40 |
| 42620  | His3.3A           | FBgn0014857 | CG5825      | P(TRiP.HMS02455)attP2  |
| 34940  | His3.3B           | FBgn0004828 | CG8989      | P(TRiP.HMS00148)attP2  |
| 34816  | His4r             | FBgn0013981 | CG3379      | P(TRiP.HMS00126)attP2  |
| 28013  | HisC11            | FBgn0037950 | CG14723     | P(TRiP.JF02847)attP2   |
| 28031  | hiw               | FBgn0030600 | CG32592     | P(TRiP.JF02866)attP2   |
| 28330  | Hk                | FBgn0263220 | CG43388     | P(TRiP.JF02965)attP2   |
| 34736  | hkb               | FBgn0261434 | CG9768      | P(TRiP.HMS01216)attP2  |
| 35308  | Hlc               | FBgn0001565 | CG1666      | P(TRiP.HMS01424)attP2  |
| 34073  | HLH106            | FBgn0261283 | CG8522      | P(TRiP.HMS00080)attP2  |
| 33758  | HLH3B             | FBgn0011276 | CG2655      | P(TRiP.HMS01101)attP2  |
| 25976  | HLH4C             | FBgn0011277 | CG3052      | P(TRiP.JF01998)attP2   |
| 28698  | HLH54F            | FBgn0022740 | CG5005      | P(TRiP.JF03114)attP2   |
| 29327  | HLHm7             | FBgn0002633 | CG8361      | P(TRiP.JF02489)attP2   |
| 26203  | HLHm delta        | FBgn0002734 | CG8328      | P(TRiP.JF02101)attP2   |
| 50652  | Hmgcr             | FBgn0263782 | CG10367     | P(TRiP.HMC03053)attP40 |
| 31344  | HmgD              | FBgn0004362 | CG17950     | P(TRiP.JF01302)attP2   |
| 26219  | HmgZ              | FBgn0010228 | CG17921     | P(TRiP.JF02117)attP2   |
| 50640  | Hml               | FBgn0029167 | CG7002      | P(TRiP.HMC03040)attP2  |
| 35659  | Hmr               | FBgn0001206 | CG1619      | P(TRiP.GLV21024)attP2  |
| 53284  | Hmt-1             | FBgn0038376 | CG4225      | P(TRiP.HMC03500)attP40 |
| 32892  | Hmt4-20           | FBgn0025639 | CG13363     | P(TRiP.HMS00681)attP2  |
| 41915  | Hmu               | FBgn0015737 | CG3373      | P(TRiP.HMS02312)attP2  |
| 40128  | Hmx               | FBgn0264005 | CG43748     | VDRC.40128             |
| 29540  | Hn                | FBgn0001208 | CG7399      | P(TRiP.JF02261)attP2   |
| 29375  | Hn4               | FBgn0004914 | CG9310      | P(TRiP.JF02539)attP2   |
| 42540  | HnRNP-K           | FBgn0267791 | CG13425     | P(TRiP.HMJ02110)attP40 |
| 33377  | hoe1              | FBgn0041150 | CG12787     | P(TRiP.HMS00251)attP2  |
| 28661  | hoe2              | FBgn0031649 | CG15624     | P(TRiP.JF03076)attP2   |
| 106431 | hog               | FBgn0266710 | CG32595     | VDRC.106431            |
| 21752  | hoip              | FBgn0015393 | CG3949      | VDRC.21752             |
| 41908  | homer             | FBgn0025777 | CG11324     | P(TRiP.HMS02301)attP2  |
| 32966  | hop               | FBgn0004864 | CG1594      | P(TRiP.HMS00761)attP2  |
| 34002  | Hop               | FBgn0024352 | CG2720      | P(TRiP.HMS00965)attP2  |
| 100775 | how               | FBgn0264491 | CG10293     | VDRC.100775            |
| 32401  | HP1b              | FBgn0030082 | CG7041      | P(TRiP.HMS00396)attP2  |
| 33962  | HP1c              | FBgn0039019 | CG6990      | P(TRiP.HMS00919)attP2  |
| 36075  | HP1D3csd          | FBgn0030994 | CG14193     | P(TRiP.GL00494)attP2   |
| 34863  | HP1e              | FBgn0037675 | CG8120      | P(TRiP.HMS00181)attP2  |
| 34075  | HP4               | FBgn0035829 | CG8044      | VDRC.34075             |
| 20455  | HP5               | FBgn0030301 | CG1745      | VDRC.20455             |
| 13072  | HP6               | FBgn0031613 | CG15636     | VDRC.13072             |
| 34717  | Hph               | FBgn0264785 | CG44015     | P(TRiP.HMS01196)attP2  |
| 33614  | hpo               | FBgn0261456 | CG11228     | P(TRiP.HMS00006)attP2  |
| 35284  | hppy              | FBgn0263395 | CG7097      | P(TRiP.GL00185)attP2   |
| 5639   | HPS1              | FBgn0033973 | CG12855     | VDRC.5639              |
| 24688  | HPS4              | FBgn0034261 | CG4966      | VDRC.24688             |
| 29377  | Hr38              | FBgn0014859 | CG1864      | P(TRiP.JF02541)attP2   |
| 33624  | Hr39              | FBgn0261239 | CG8676      | P(TRiP.HMS00018)attP2  |
| 31868  | Hr4               | FBgn0263775 | FBgn0260432 | P(TRiP.HMS05260)attP2  |
| 27254  | Hr46              | FBgn0000448 | CG33183     | P(TRiP.JF02543)attP2   |
| 39032  | Hr51              | FBgn0034012 | CG16801     | P(TRiP.HMS01951)attP2  |

|        |                        |             |         |                          |
|--------|------------------------|-------------|---------|--------------------------|
| 31990  | Hr78                   | FBgn0015239 | CG7199  | P{TRiP.JF03424}attP2     |
| 27992  | Hr96                   | FBgn0015240 | CG11783 | P{TRiP.JF02350}attP2     |
| 33716  | Hrb27C                 | FBgn0004838 | CG10377 | P{TRiP.HMS00597}attP2    |
| 31684  | Hrb27C                 | FBgn0004838 | CG10377 | P{TRiP.JF01477}attP2     |
| 31244  | Hrb87F                 | FBgn0004237 | CG12749 | P{TRiP.JF01757}attP2     |
| 32351  | Hrb98DE                | FBgn0001215 | CG9983  | P{TRiP.HMS00342}attP2    |
| 1161   | Hrd3                   | FBgn0028475 | CG10221 | VDRC.1161                |
| 33378  | hrg                    | FBgn0015949 | CG9854  | P{TRiP.HMS00252}attP2    |
| 33900  | Hrs                    | FBgn0031450 | CG2903  | P{TRiP.HMS00841}attP2    |
| 37123  | Hs2st                  | FBgn0024230 | CG10234 | VDRC.37123               |
| 28618  | Hs3st-A                | FBgn0053147 | CG33147 | P{TRiP.JF03033}attP2     |
| 110601 | Hs3st-B                | FBgn0031005 | CG7890  | VDRC.110601              |
| 42658  | Hs6st                  | FBgn0038755 | CG4451  | VDRC.42658               |
| 34527  | Hsc70-1                | FBgn0001216 | CG8937  | P{TRiP.HMS00888}attP2    |
| 42014  | Hsc70-2                | FBgn0001217 | CG7756  | P{TRiP.HMS02415}attP40   |
| 32402  | Hsc70-3                | FBgn0001218 | CG4147  | P{TRiP.HMS00397}attP2    |
| 34836  | Hsc70-4                | FBgn0266599 | CG4264  | P{TRiP.HMS00152}attP2    |
| 33742  | Hsc70Cb                | FBgn0026418 | CG6603  | P{TRiP.HMS01080}attP2    |
| 7333   | Hsepi                  | FBgn0033087 | CG3194  | VDRC.7333                |
| 27070  | Hsf                    | FBgn0001222 | CG5748  | P{TRiP.JF02415}attP2     |
| 41709  | Hsp22                  | FBgn0001223 | CG4460  | P{TRiP.HMS02274}attP40   |
| 44029  | Hsp23                  | FBgn0001224 | CG4463  | P{TRiP.HMS02745}attP40   |
| 42610  | Hsp26                  | FBgn0001225 | CG4183  | P{TRiP.HMS02445}attP40   |
| 33922  | Hsp27                  | FBgn0001226 | CG4466  | P{TRiP.HMS00867}attP2    |
| 34729  | Hsp60                  | FBgn0015245 | CG12101 | P{TRiP.HMS01209}attP2    |
| 41962  | Hsp67Ba                | FBgn0001227 | CG4167  | P{TRiP.HMS02359}attP2    |
| 41709  | Hsp67Bb                | FBgn0001228 | CG4456  | P{TRiP.HMS02274}attP40   |
| 42607  | Hsp67Bc                | FBgn0001229 | CG4190  | P{TRiP.HMS02440}attP40   |
| 50637  | Hsp68                  | FBgn0001230 | CG5436  | P{TRiP.HMC03036}attP2    |
| 42639  | Hsp70Aa                | FBgn0013275 | CG31366 | P{TRiP.HMS02475}attP40   |
| 35663  | Hsp70Ab                | FBgn0013276 | CG18743 | P{TRiP.GLV21028}attP2    |
| 33948  | Hsp70B genes (4 genes) |             | CG31449 | P{TRiP.HMS00900}attP2    |
| 35672  | Hsp70Ba                | FBgn0013277 | CG5834  | P{TRiP.GLV21037}attP2    |
| 33916  | Hsp70Bbb               | FBgn0051354 | CG6489  | P{TRiP.HMS00859}attP2    |
| 42626  | Hsp70Bc                | FBgn0013279 | CG1242  | P{TRiP.HMS02461}attP40   |
| 33947  | Hsp83                  | FBgn0001233 | CG30173 | P{TRiP.HMS00899}attP2    |
| 35051  | HSPC300                | FBgn0061198 | CG17117 | P{TRiP.HMS01465}attP2    |
| 34637  | hth                    | FBgn0001235 | CG7223  | P{TRiP.HMS01112}attP2    |
| 35024  | hit                    | FBgn0010389 | CG8464  | P{TRiP.HMS01437}attP2    |
| 28544  | HtrA2                  | FBgn0038233 | CG43443 | P{TRiP.HM05030}attP2     |
| 38283  | hts                    | FBgn0263391 | CG43443 | P{TRiP.HMS01736}attP40   |
| 35421  | hts                    | FBgn0263391 | CG9995  | P{TRiP.GL00344}attP2     |
| 31264  | hit                    | FBgn0027655 | CG30364 | P{TRiP.JF01205}attP2     |
| 30791  | hit                    | FBgn0027655 | CG30364 | VDRC.30791               |
| 28705  | hug                    | FBgn0028374 | CG6371  | P{TRiP.JF03122}attP2     |
| 32352  | hyd                    | FBgn0002431 | CG9484  | P{TRiP.HMS00343}attP2    |
| 13314  | Hydr1                  | FBgn0033382 | CG8058  | VDRC.13314               |
| 7532   | Hydr2                  | FBgn0014906 | CG3488  | VDRC.7532                |
| 32187  | hydra                  | FBgn0031128 | CG1338  | VDRC.32187               |
| 31722  | hyx                    | FBgn0037657 | CG11990 | P{TRiP.HM04031}attP2     |
| 35238  | hyx                    | FBgn0037657 | CG11990 | P{TRiP.GL00123}attP2     |
| 44050  | I-2                    | FBgn0028429 | CG10574 | P{TRiP.HMS02767}attP40   |
| 24101  | I-2                    | FBgn0028429 | CG10574 | P{UAS-I-2.HA}G; P{UAS-Pp |
| 32314  | I-t                    | FBgn0025821 | CG14719 | VDRC.32314               |
| 33672  | IA-2                   | FBgn0031294 | CG31795 | P{TRiP.HMS00536}attP2    |
| 28691  | ial                    | FBgn0024227 | CG6620  | P{TRiP.JF03107}attP2     |
| 34776  | lap2                   | FBgn0015247 | CG8293  | P{TRiP.HMS00085}attP2    |
| 25865  | iav                    | FBgn0086693 | CG4536  | P{TRiP.JF01904}attP2     |
| 32403  | ice                    | FBgn0019972 | CG7788  | P{TRiP.HMS00398}attP2    |
| 50123  | icln                   | FBgn0029079 | CG4924  | VDRC.50123               |
| 34875  | ico                    | FBgn0263133 | CG4567  | VDRC.34875               |
| 42188  | ics                    | FBgn0028546 | CG9031  | VDRC.42188               |
| 34552  | ida                    | FBgn0041147 | CG10850 | P{TRiP.HMS01024}attP2    |
| 15957  | ide                    | FBgn0001247 | CG5517  | VDRC.15957               |
| 12414  | ldg1                   | FBgn0020416 | CG4472  | VDRC.12414               |
| 55935  | ldg2                   | FBgn0020415 | CG4475  | P{TRiP.HMC04223}attP40   |
| 12423  | ldg3                   | FBgn0020414 | CG4559  | VDRC.12423               |
| 41602  | ldg4                   | FBgn0026415 | CG1780  | P{TRiP.GL01142}attP2     |



|        |             |             |         |                        |
|--------|-------------|-------------|---------|------------------------|
| 16795  | ldgf5       | FBgn0064237 | CG5154  | VDRC.16795             |
| 41708  | ldh         | FBgn0001248 | CG7176  | P(TRIP.HMS02273)attP40 |
| 38958  | if          | FBgn0001250 | CG9623  | P(TRIP.HMS01872)attP40 |
| 29428  | IFa         | FBgn0053527 | CG33527 | P(TRIP.JF03364)attP2   |
| 32514  | ifc         | FBgn0001941 | CG9078  | P(TRIP.HMS00518)attP2  |
| 29598  | igl         | FBgn0013467 | CG18285 | P(TRIP.JF03277)attP2   |
| 29574  | lh          | FBgn0263397 | CG8585  | P(TRIP.JF03253)attP2   |
| 29897  | ihog        | FBgn0031872 | CG9211  | VDRC.29897             |
| 34709  | ik2         | FBgn0086657 | CG2615  | P(TRIP.HMS01188)attP2  |
| 35374  | llk         | FBgn0028427 | CG10504 | P(TRIP.GL00288)attP2   |
| 32861  | llp1        | FBgn0044051 | CG14173 | P(TRIP.HMS00648)attP2  |
| 32475  | llp2        | FBgn0036046 | CG8167  | P(TRIP.HMS00476)attP2  |
| 33681  | llp3        | FBgn0044050 | CG14167 | P(TRIP.HMS00546)attP2  |
| 33682  | llp4        | FBgn0044049 | CG6736  | P(TRIP.HMS00547)attP2  |
| 33683  | llp5        | FBgn0044048 | CG33273 | P(TRIP.HMS00548)attP2  |
| 33684  | llp6        | FBgn0044047 | CG14049 | P(TRIP.HMS00549)attP2  |
| 32862  | llp7        | FBgn0044046 | CG13317 | P(TRIP.HMS00649)attP2  |
| 9420   | llp8        | FBgn0036690 | CG14059 | VDRC.9420              |
| 42599  | IM1         | FBgn0034329 | CG18108 | P(TRIP.HMS02431)attP40 |
| 28540  | IM10        | FBgn0033835 | CG18279 | P(TRIP.HM05026)attP2   |
| 110032 | IM14        | FBgn0067905 | CG33990 | VDRC.110032            |
| 28788  | IM2         | FBgn0025583 | CG18106 | P(TRIP.JF03216)attP2   |
| 15384  | IM23        | FBgn0034328 | CG15066 | VDRC.15384             |
| 29214  | IM3         | FBgn0040736 | CG16844 | VDRC.29214             |
| 56018  | IM4         | FBgn0040653 | CG15231 | HMC04314               |
| 38933  | imd         | FBgn0013983 | CG5576  | P(TRIP.HMS00253)attP2  |
| 41590  | Ime4        | FBgn0039139 | CG5933  | P(TRIP.GL01126)attP2   |
| 34977  | Imp         | FBgn0285926 | CG1691  | P(TRIP.HMS01168)attP2  |
| 35235  | ImpE2       | FBgn0001254 | CG1934  | P(TRIP.GL00120)attP2   |
| 16403  | ImpE3       | FBgn0001255 | CG2723  | VDRC.16403             |
| 55387  | ImpL1       | FBgn0001256 | CG10717 | P(TRIP.HMC04075)attP40 |
| 55855  | ImpL2       | FBgn0001257 | CG15009 | P(TRIP.HMC03863)attP40 |
| 33640  | ImpL3       | FBgn0001258 | CG10160 | P(TRIP.HMS00039)attP2  |
| 33768  | inaC        | FBgn0004784 | CG6518  | P(TRIP.JF02958)attP2   |
| 52313  | inaD        | FBgn0001263 | CG3504  | P(TRIP.HMC03170)attP2  |
| 38444  | inaE        | FBgn0261244 | CG33174 | VDRC.38444             |
| 103713 | inaE        | FBgn0261244 | CG33174 | VDRC.103713            |
| 50590  | inc         | FBgn0025394 | CG32810 | P(TRIP.GLC01712)attP2  |
| 25889  | inc         | FBgn0025394 | CG32810 | P(TRIP.JF01930)attP2   |
| 35366  | Incenp      | FBgn0260991 | CG12165 | P(TRIP.GL00279)attP2   |
| 28662  | ind         | FBgn0025776 | CG11551 | P(TRIP.JF03077)attP2   |
| 34891  | Indy-2      | FBgn0260466 | CG33933 | P(TRIP.HMS01236)attP2  |
| 51919  | ine         | FBgn0011603 | CG15444 | P(TRIP.HMS03378)attP2  |
| 33708  | Ino80       | FBgn0086613 | CG31212 | P(TRIP.HMS00586)attP2  |
| 5617   | Inos        | FBgn0025885 | CG11143 | VDRC.5617              |
| 31594  | InR         | FBgn0013984 | CG18402 | P(TRIP.JF01183)attP2   |
| 35251  | InR         | FBgn0013984 | CG18402 | P(TRIP.GL00139)attP2   |
| 32411  | Inr-a       | FBgn0264962 | CG10228 | P(TRIP.HMS00406)attP2  |
| 38969  | insc        | FBgn0011674 | CG11312 | P(TRIP.HMS01883)attP2  |
| 27032  | Int6        | FBgn0025582 | CG9677  | VDRC.27032             |
| 25825  | IntS1       | FBgn0034964 | CG3173  | VDRC.25825             |
| 44433  | IntS10      | FBgn0035462 | CG1120  | P(TRIP.GLC01389)attP2  |
| 33450  | IntS11      | FBgn0039691 | CG1972  | VDRC.33450             |
| 42764  | IntS12      | FBgn0039459 | CG5491  | P(TRIP.GL00719)attP2   |
| 24237  | IntS2       | FBgn0030858 | CG8211  | VDRC.24237             |
| 31730  | IntS3       | FBgn0262117 | CG17665 | P(TRIP.HM04039)attP2   |
| 52904  | IntS6       | FBgn0261383 | CG3125  | P(HMC03644)attP40      |
| 33048  | IntS8       | FBgn0025830 | CG5859  | P(TRIP.HMS00721)attP2  |
| 27380  | IntS9       | FBgn0036570 | CG5222  | VDRC.27380             |
| 41675  | inv         | FBgn0001269 | CG17835 | P(TRIP.HMS02209)attP2  |
| 16416  | Invadolysin | FBgn0086359 | CG3953  | VDRC.16416             |
| 42645  | inx2        | FBgn0027108 | CG4590  | P(TRIP.HMS02481)attP2  |
| 30501  | inx3        | FBgn0265274 | CG1448  | P(TRIP.HM05245)attP2   |
| 28042  | inx5        | FBgn0030989 | CG7537  | P(TRIP.JF02877)attP2   |
| 31889  | inx6        | FBgn0027107 | CG17063 | P(TRIP.JF02168)attP2   |
| 26297  | inx7        | FBgn0027106 | CG2977  | P(TRIP.JF02066)attP2   |
| 43205  | iotaTry     | FBgn0015001 | CG7754  | VDRC.43205             |
| 31733  | IP3K1       | FBgn0032147 | CG4026  | P(TRIP.HM04042)attP2   |

|        |                  |             |         |                        |
|--------|------------------|-------------|---------|------------------------|
| 35296  | IP3K1            | FBgn0032147 | CG4026  | P(TRIP.GL00198)attP2   |
| 55240  | IP3K2            | FBgn0266375 | CG45017 | P(HMC02364)attP2       |
| 35250  | lpk1             | FBgn0050295 | CG30295 | P(TRIP.GL00137)attP2   |
| 35255  | lpk2             | FBgn0031267 | CG13688 | P(TRIP.GL00143)attP2   |
| 36129  | iPLA2-VIA        | FBgn0036053 | CG6718  | P(TRIP.HMS01544)attP2  |
| 28028  | lpp              | FBgn0016672 | CG3028  | P(TRIP.JF02862)attP2   |
| 29539  | lr25a            | FBgn0031634 | CG15627 | P(TRIP.JF01925)attP2   |
| 51026  | lr62a            | FBgn0053971 | CG33971 | P(TRIP.HMJ21152)attP40 |
| 34678  | lr76a            | FBgn0260874 | CG42584 | P(TRIP.HMS01156)attP2  |
| 54846  | lr76b            | FBgn0036937 | CG7385  | P(HMJ21583)attP40      |
| 8433   | lr76b            | FBgn0036937 | CG7385  | VDRC.8433              |
| 25813  | lr8a             | FBgn0052704 | CG32704 | P(TRIP.JF01831)attP2   |
| 58205  | lr92a            | FBgn0038789 | CG15685 | P(TRIP.HMJ22175)attP40 |
| 53703  | lr94a            | FBgn0051164 | CG31164 | P(HMJ21737)attP40      |
| 53975  | lr94h            | FBgn0039080 | CG17382 | P(HMJ21363)attP40      |
| 29594  | lrbp             | FBgn0011774 | CG5247  | P(TRIP.JF03273)attP2   |
| 101098 | lrc              | FBgn0038465 | CG8913  | VDRC.101098            |
| 34092  | ird1             | FBgn0260935 | CG9746  | P(TRIP.HMS00908)attP2  |
| 35186  | ird5             | FBgn0024222 | CG4201  | P(TRIP.GL00058)attP2   |
| 57751  | ird5             | FBgn0024222 | CG4201  | P(HMC04944)attP40      |
| 36743  | lre1             | FBgn0261984 | CG4583  | P(TRIP.HMS03003)attP40 |
| 50587  | lris             | FBgn0031305 | CG4715  | P(TRIP.GLC01709)attP2  |
| 42644  | lrk1             | FBgn0265042 | CG44159 | P(TRIP.HMS02480)attP2  |
| 41981  | lrk2             | FBgn0039081 | CG4370  | P(TRIP.HMS02379)attP2  |
| 26720  | lrk3             | FBgn0032706 | CG10369 | P(TRIP.JF02262)attP2   |
| 105583 | lrp-1A           | FBgn0024958 | CG4900  | VDRC.105583            |
| 55224  | lrp-1B           | FBgn0024957 | CG6342  | P(GLC01841)attP2       |
| 45497  | isopeptidase-T-3 | FBgn0028372 | CG11025 | VDRC.45497             |
| 101533 | isoQC            | FBgn0036999 | CG5976  | VDRC.101533            |
| 32845  | lswi             | FBgn0011604 | CG8625  | P(TRIP.HMS00628)attP2  |
| 44534  | ltgal phaPS4     | FBgn0034005 | CG16827 | P(TRIP.HMC02928)attP40 |
| 28535  | ltgal phaPS4     | FBgn0034005 | CG16827 | P(TRIP.HM05021)attP2   |
| 100120 | ltgal phaPS5     | FBgn0034880 | CG5372  | VDRC.100120            |
| 25799  | itp              | FBgn0035023 | CG13586 | P(TRIP.JF01817)attP2   |
| 25937  | ltp-r 83A        | FBgn0010051 | CG1063  | P(TRIP.JF01957)attP2   |
| 37545  | ix               | FBgn0001276 | CG13201 | P(TRIP.GLV21092)attP2  |
| 36852  | Jabba            | FBgn0259682 | CG42351 | P(GL01111)attP2        |
| 34971  | Jafrac1          | FBgn0040309 | CG1633  | P(TRIP.HMS00935)attP2  |
| 43252  | Jafrac2          | FBgn0040308 | CG1274  | VDRC.43252             |
| 108991 | jagn             | FBgn0037374 | CG10978 | VDRC.108991            |
| 41846  | janA             | FBgn0001280 | CG7933  | P(TRIP.GL01274)attP2   |
| 50524  | janB             | FBgn0001281 | CG7931  | VDRC.50524             |
| 28064  | jar              | FBgn0011225 | CG5695  | P(TRIP.JF02901)attP2   |
| 40855  | Jarid2           | FBgn0036004 | CG3654  | P(TRIP.HMS02022)attP40 |
| 39070  | jbug             | FBgn0028371 | CG30092 | P(TRIP.HMS01990)attP2  |
| 43044  | jdp              | FBgn0027654 | CG2239  | VDRC.43044             |
| 30799  | jeb              | FBgn0086677 | CG30040 | VDRC.30799             |
| 31058  | jet              | FBgn0031652 | CG8873  | P(TRIP.JF01506)attP2   |
| 19172  | jhamt            | FBgn0028841 | CG17330 | VDRC.19172             |
| 32975  | JHDM2            | FBgn0037703 | CG8165  | P(TRIP.HMS00775)attP2  |
| 44049  | Jhe              | FBgn0010052 | CG8425  | VDRC.44049             |
| 31229  | Jhedup           | FBgn0034076 | CG8424  | P(TRIP.JF01808)attP2   |
| 50676  | Jheh1            | FBgn0010053 | CG15101 | P(TRIP.HMC03077)attP2  |
| 41866  | Jheh2            | FBgn0034405 | CG15102 | P(TRIP.GL01296)attP40  |
| 5008   | Jheh3            | FBgn0034406 | CG15106 | VDRC.5008              |
| 51781  | Jhl-1            | FBgn0028426 | CG3298  | P(TRIP.HMC03336)attP40 |
| 41706  | Jhl-21           | FBgn0028425 | CG12317 | P(TRIP.HMS02271)attP40 |
| 31921  | jiqr1            | FBgn0039350 | CG17383 | P(TRIP.JF02211)attP2   |
| 42571  | JIL-1            | FBgn0020412 | CG6297  | P(TRIP.HMJ02230)attP40 |
| 42662  | jim              | FBgn0027339 | CG11352 | P(TRIP.HMS02498)attP40 |
| 35750  | jing             | FBgn0086655 | CG9397  | P(TRIP.HMS01493)attP2  |
| 42484  | Jon25Bi          | FBgn0020906 | CG8867  | P(TRIP.GL01343)attP40  |
| 44504  | Jon25Bii         | FBgn0031654 | CG8869  | P(TRIP.HMC02890)attP2  |
| 55344  | Jon25Biii        | FBgn0031653 | CG8871  | P(TRIP.HMC04031)attP40 |
| 44486  | Jon44E           | FBgn0001285 | CG8579  | P(TRIP.HMC02391)attP2  |
| 44656  | Jon65Ai          | FBgn0035667 | CG10475 | P(TRIP.HMC02430)attP2  |
| 55343  | Jon65Aii         | FBgn0035666 | CG6580  | P(TRIP.HMC04030)attP40 |
| 51692  | Jon65Aiii        | FBgn0035665 | CG6483  | P(TRIP.HMC02917)attP2  |

|       |            |             |         |                        |
|-------|------------|-------------|---------|------------------------|
| 43306 | Jon65Aiv   | FBgn0250815 | CG6467  | P{TRiP.HMS02689}attP2  |
| 51754 | Jon66Ci    | FBgn0035886 | CG7118  | P{TRiP.HMC03305}attP2  |
| 51161 | Jon74E     | FBgn0023197 | CG6298  | P{TRiP.HMC02401}attP2  |
| 44269 | Jon99Ci    | FBgn0003358 | CG31039 | P{TRiP.HMS02766}attP40 |
| 50705 | Jon99Cii   | FBgn0003356 | CG31034 | P{TRiP.HMC03107}attP2  |
| 50648 | Jon99Fii   | FBgn0039777 | CG2229  | P{TRiP.HMC03049}attP2  |
| 31595 | Jra        | FBgn0001291 | CG2275  | P{TRiP.JF01184}attP2   |
| 41938 | jub        | FBgn0030530 | CG11063 | P{TRiP.HMS02335}attP40 |
| 35438 | jumu       | FBgn0015396 | CG4029  | P{TRiP.GL00363}attP2   |
| 43177 | jvl        | FBgn0263929 | CG43162 | P{TRiP.GL01520}attP2   |
| 26010 | KaiRIA     | FBgn0028422 | CG18039 | P{TRiP.JF02035}attP2   |
| 55981 | Kal1       | FBgn0039155 | CG6173  | P{TRiP.HMC04277}attP40 |
| 14703 | Kal1       | FBgn0039155 | CG6173  | VDRC.14703             |
| 27523 | Kap-alpha1 | FBgn0024889 | CG8548  | P{TRiP.JF02673}attP2   |
| 27535 | Kap-alpha3 | FBgn0027338 | CG9423  | P{TRiP.JF02686}attP2   |
| 32506 | kat-60L1   | FBgn0003735 | CG1193  | P{TRiP.HMS00510}attP2  |
| 28375 | katanin-60 | FBgn0040208 | CG10229 | P{TRiP.JF03012}attP2   |
| 33379 | kay        | FBgn0001297 | CG33956 | P{TRiP.HMS00254}attP2  |
| 43181 | Kaz-m1     | FBgn0002578 | CG8342  | P{TRiP.GL01525}attP2   |
| 41886 | Kaz-m1     | FBgn0002578 | CG8342  | P{TRiP.HMS02308}attP40 |
| 41615 | Kaz1-ORFB  | FBgn0063923 | CG1220  | P{TRiP.GL01197}attP40  |
| 34584 | kcc        | FBgn0261794 | CG5594  | P{TRiP.HMS01058}attP2  |
| 27252 | KCNQ       | FBgn0033494 | CG33135 | P{TRiP.JF02562}attP2   |
| 33699 | Kdm2       | FBgn0037659 | CG11033 | P{TRiP.HMS00574}attP2  |
| 34629 | Kdm4A      | FBgn0033233 | CG15835 | P{TRiP.HMS01304}attP2  |
| 35676 | Kdm4B      | FBgn0053182 | CG33182 | P{TRiP.GLV21041}attP2  |
| 36740 | kdn        | FBgn0261955 | CG3861  | P{TRiP.HMS01631}attP40 |
| 40932 | Keap1      | FBgn0038475 | CG3962  | P{TRiP.HMS02180}attP40 |
| 31874 | kek2       | FBgn0015400 | CG4977  | P{TRiP.HM05267}attP2   |
| 40830 | kek5       | FBgn0031016 | CG12199 | P{TRiP.HMS01996}attP40 |
| 31251 | kel        | FBgn0001301 | CG7210  | P{TRiP.JF01768}attP2   |
| 34739 | ken        | FBgn0011236 | CG5575  | P{TRiP.HMS01219}attP2  |
| 53349 | kermit     | FBgn0010504 | CG11546 | P{TRiP.HMC03578}attP40 |
| 35572 | key        | FBgn0041205 | CG16910 | P{TRiP.GL00088}attP2   |
| 35770 | Khc        | FBgn0001308 | CG7765  | P{TRiP.HMS01519}attP2  |
| 36733 | Khc-73     | FBgn0019968 | CG8183  | P{TRiP.HMS01624}attP40 |
| 28683 | kibra      | FBgn0262127 | CG33967 | P{TRiP.JF03098}attP2   |
| 35472 | Kif19A     | FBgn0038205 | CG9913  | P{TRiP.GL00400}attP2   |
| 40886 | Kif3C      | FBgn0039925 | CG17461 | P{TRiP.HMS02134}attP40 |
| 55692 | kin17      | FBgn0024887 | CG5649  | P{TRiP.HMC03906}attP40 |
| 34908 | kis        | FBgn0086902 | CG3696  | P{TRiP.HMS01254}attP2  |
| 53317 | kl-3       | FBgn0267432 | CG45785 | P{TRiP.HMC03546}attP2  |
| 55609 | kl-5       | FBgn0267433 | CG45786 | P{TRiP.HMC03747}attP2  |
| 36721 | klar       | FBgn0001316 | CG17046 | P{TRiP.HMS01612}attP2  |
| 42597 | Klc        | FBgn0010235 | CG5433  | P{TRiP.HMS02429}attP40 |
| 28746 | klg        | FBgn0017590 | CG6669  | P{TRiP.JF03174}attP2   |
| 38352 | KLHL18     | FBgn0037978 | CG3571  | P{TRiP.HMS01820}attP40 |
| 33963 | Klp10A     | FBgn0030268 | CG1453  | P{TRiP.HMS00920}attP2  |
| 40943 | Klp31E     | FBgn0032243 | CG5300  | P{TRiP.HMS02191}attP40 |
| 40944 | Klp3A      | FBgn0011606 | CG8590  | P{TRiP.HMS02192}attP40 |
| 36577 | Klp54D     | FBgn0263076 | CG43323 | P{TRiP.GL00537}attP2   |
| 35596 | Klp59C     | FBgn0034824 | CG3219  | P{TRiP.GL00433}attP2   |
| 35474 | Klp59D     | FBgn0034827 | CG12192 | P{TRiP.GL00402}attP2   |
| 33685 | Klp61F     | FBgn0004378 | CG9191  | P{TRiP.HMS00552}attP2  |
| 40945 | Klp64D     | FBgn0004380 | CG10642 | P{TRiP.HMS02193}attP40 |
| 27549 | Klp67A     | FBgn0004379 | CG10923 | P{TRiP.JF02701}attP2   |
| 29410 | Klp68D     | FBgn0004381 | CG7293  | P{TRiP.JF03346}attP2   |
| 39037 | Klp98A     | FBgn0004387 | CG5658  | P{TRiP.HMS01957}attP40 |
| 28731 | klu        | FBgn0013469 | CG12296 | P{TRiP.JF03158}attP2   |
| 31916 | kn         | FBgn0001319 | CG10197 | P{TRiP.JF02206}attP2   |
| 34705 | kni        | FBgn0001320 | CG4717  | P{TRiP.HMS01184}attP2  |
| 36664 | knrl       | FBgn0001323 | CG4761  | P{TRiP.HMS01552}attP2  |
| 40924 | koi        | FBgn0265003 | CG44154 | P{TRiP.HMS02172}attP40 |
| 31584 | kon        | FBgn0032683 | CG10275 | P{TRiP.JF01159}attP2   |
| 37283 | kon        | FBgn0032683 | CG10275 | VDRC.37283             |
| 39061 | KP78a      | FBgn0026064 | CG6715  | P{TRiP.HMS01981}attP40 |
| 39061 | KP78b      | FBgn0026063 | CG17216 | P{TRiP.HMS01981}attP40 |
| 34632 | Kr         | FBgn0001325 | CG3340  | P{TRiP.HMS01106}attP2  |

|       |            |             |         |                        |
|-------|------------|-------------|---------|------------------------|
| 50685 | Kr-h1      | FBgn0266450 | CG45074 | P[TRIP.HMC03086]attP2  |
| 37511 | krimp      | FBgn0034098 | CG15707 | P[TRIP.HMS01653]attP40 |
| 29523 | krz        | FBgn0040206 | CG1487  | P[TRIP.HM05200]attP2   |
| 33880 | krz        | FBgn0040206 | CG1487  | P[TRIP.HMS00817]attP2  |
| 32937 | ksr        | FBgn0015402 | CG2899  | P[TRIP.HMS00730]attP2  |
| 33933 | kst        | FBgn0004167 | CG12008 | P[TRIP.HMS00882]attP2  |
| 34588 | kto        | FBgn0001324 | CG8491  | P[TRIP.HMS01062]attP2  |
| 27710 | Ku80       | FBgn0041627 | CG18801 | P[TRIP.JF02790]attP2   |
| 58283 | Kua        | FBgn0032850 | CG10723 | P[TRIP.HMJ22368]attP40 |
| 40888 | kug        | FBgn0261574 | CG7749  | P[TRIP.HMS02136]attP40 |
| 28750 | kuk        | FBgn0038476 | CG5175  | P[TRIP.JF03178]attP2   |
| 55653 | Kul        | FBgn0039688 | CG1964  | P[TRIP.HMC03803]attP40 |
| 38295 | kune       | FBgn0033032 | CG1298  | P[TRIP.HMS01755]attP40 |
| 38214 | kune       | FBgn0033032 | CG1298  | P[TRIP.GL00655]attP40  |
| 33380 | l(1)10Bb   | FBgn0001491 | CG1639  | P[TRIP.HMS00255]attP2  |
| 41916 | l(1)1Bi    | FBgn0001341 | CG6189  | P[TRIP.HMS02313]attP2  |
| 31201 | l(1)dd4    | FBgn0001612 | CG10988 | P[TRIP.JF01719]attP2   |
| 51448 | l(1)G0045  | FBgn0026702 | CG32763 | P[TRIP.HMC03178]attP2  |
| 36625 | l(1)G0148  | FBgn0028360 | CG32742 | P[TRIP.GL00585]attP2   |
| 58326 | l(1)G0193  | FBgn0027280 | CG2206  | P[TRIP.HMJ22456]attP40 |
| 38935 | l(1)G0232  | FBgn0028341 | CG32697 | P[TRIP.HMS00731]attP2  |
| 51779 | l(1)G0255  | FBgn0028336 | CG4094  | P[TRIP.HMC03334]attP40 |
| 32910 | l(1)G0289  | FBgn0028331 | CG2221  | P[TRIP.HMS00700]attP2  |
| 55345 | l(1)G0334  | FBgn0028325 | CG7010  | P[TRIP.HMC04032]attP40 |
| 27058 | l(1)sc     | FBgn0002561 | CG3839  | P[TRIP.JF02399]attP2   |
| 40835 | l(2)03709  | FBgn0010551 | CG15081 | P[TRIP.HMS02001]attP40 |
| 33999 | l(2)08717  | FBgn0010651 | CG15095 | P[TRIP.HMS00962]attP2  |
| 56023 | l(2)34Fc   | FBgn0261534 | CG7532  | P[TRIP.HMC04319]attP40 |
| 44651 | l(2)35Be   | FBgn0261881 | CG4140  | P[TRIP.HMC02389]attP2  |
| 42608 | l(2)37Bb   | FBgn0002021 | CG10655 | P[TRIP.HMS02443]attP40 |
| 32912 | l(2)37Cc   | FBgn0002031 | CG10691 | P[TRIP.HMS00702]attP2  |
| 43981 | l(2)37Cd   | FBgn0086445 | CG10563 | P[TRIP.GL01591]attP2   |
| 51510 | l(2)dtl    | FBgn0013548 | CG11295 | P[TRIP.HMC03280]attP2  |
| 41724 | l(2)efl    | FBgn0011296 | CG4533  | P[TRIP.HMS02290]attP2  |
| 51816 | l(2)efl    | FBgn0011296 | CG4533  | P[TRIP.HMC03387]attP40 |
| 27311 | l(2)gd1    | FBgn0261983 | CG4713  | P[TRIP.JF02619]attP2   |
| 38989 | l(2)gl     | FBgn0002121 | CG2671  | P[TRIP.HMS01905]attP40 |
| 38206 | l(2)gl     | FBgn0002121 | CG2671  | P[TRIP.GL00645]attP40  |
| 35282 | l(2)k01209 | FBgn0022029 | CG4798  | P[TRIP.GL00183]attP2   |
| 53352 | l(2)k14505 | FBgn0021856 | CG8674  | P[TRIP.HMC03581]attP40 |
| 44482 | l(2)k14710 | FBgn0021847 | CG8325  | P[TRIP.HMC02372]attP40 |
| 34966 | l(2)NC136  | FBgn0033029 | CG8426  | P[TRIP.HMS00863]attP2  |
| 53350 | l(2)not    | FBgn0011297 | CG4084  | P[TRIP.HMC03579]attP40 |
| 28594 | l(2)tid    | FBgn0002174 | CG5504  | P[TRIP.HMS05082]attP2  |
| 43240 | l(3)01239  | FBgn0010741 | CG6302  | P[TRIP.GLC01427]attP2  |
| 38984 | l(3)03670  | FBgn0010808 | CG1715  | P[TRIP.HMS01900]attP40 |
| 42859 | l(3)04053  | FBgn0010830 | CG11238 | P[TRIP.HMS02551]attP40 |
| 51159 | l(3)05822  | FBgn0010877 | CG7129  | P[TRIP.HMC02398]attP2  |
| 35691 | l(3)07882  | FBgn0010926 | CG5824  | P[TRIP.GLV21056]attP2  |
| 34024 | l(3)72Ab   | FBgn0263599 | CG5931  | P[TRIP.HMS00994]attP2  |
| 53328 | l(3)72Dh   | FBgn0263604 | CG5161  | P[TRIP.HMC03557]attP40 |
| 51907 | l(3)72Dn   | FBgn0263605 | CG5018  | P[TRIP.HMC03482]attP40 |
| 58192 | l(3)72Dr   | FBgn0263608 | CG32154 | P[TRIP.HMJ21851]attP40 |
| 44011 | l(3)73Ah   | FBgn0002283 | CG4195  | P[TRIP.HMS02725]attP40 |
| 42870 | l(3)76BDm  | FBgn0260655 | CG8793  | P[TRIP.HMS02563]attP40 |
| 38519 | l(3)82Fd   | FBgn0013576 | CG32464 | P[TRIP.HMS01666]attP2  |
| 32454 | l(3)L1231  | FBgn0086686 | CG7832  | P[TRIP.HMS00453]attP2  |
| 32962 | l(3)m bn   | FBgn0002440 | CG12755 | P[TRIP.HMS00757]attP2  |
| 35052 | l(3)m bt   | FBgn0002441 | CG5954  | P[TRIP.HMS01466]attP2  |
| 43278 | l(3)neo18  | FBgn0011455 | CG9762  | P[TRIP.GLC01468]attP2  |
| 51515 | l(3)neo38  | FBgn0265276 | CG6930  | P[TRIP.HMC03292]attP2  |
| 42789 | La         | FBgn0011638 | CG10922 | P[TRIP.GL01159]attP2   |
| 26753 | lab        | FBgn0002522 | CG1264  | P[TRIP.JF02317]attP2   |
| 38536 | Lac        | FBgn0010238 | CG12369 | P[TRIP.HMS01756]attP40 |
| 51475 | lace       | FBgn0002524 | CG4162  | P[TRIP.HMC03219]attP40 |
| 40905 | lack       | FBgn0029006 | CG4943  | P[TRIP.HMS02153]attP40 |
| 31605 | Lam        | FBgn0002525 | CG6944  | P[TRIP.JF01389]attP2   |
| 36617 | Lam        | FBgn0002525 | CG6944  | P[TRIP.GL00577]attP2   |

|       |              |             |         |                        |
|-------|--------------|-------------|---------|------------------------|
| 31336 | lama         | FBgn0016031 | CG10645 | P{TRIP.JF01294}attP2   |
| 31621 | LamC         | FBgn0010397 | CG10119 | P{TRIP.JF01406}attP2   |
| 38335 | Lamp1        | FBgn0032949 | CG3305  | P{TRIP.HMS01802}attP2  |
| 28071 | LanA         | FBgn0002526 | CG10236 | P{TRIP.JF02908}attP2   |
| 42616 | LanB1        | FBgn0261800 | CG7123  | P{TRIP.HMS02451}attP2  |
| 39021 | lap          | FBgn0086372 | CG2520  | P{TRIP.HMS01939}attP40 |
| 27036 | Lap1         | FBgn0033984 | CG10255 | P{TRIP.JF02362}attP2   |
| 40938 | Lar          | FBgn0000464 | CG10443 | P{TRIP.HMS02186}attP40 |
| 27703 | lark         | FBgn0011640 | CG8597  | P{TRIP.JF02783}attP2   |
| 42578 | lar p        | FBgn0261618 | CG42551 | P{TRIP.HMJ02239}attP40 |
| 26305 | Lasp         | FBgn0063485 | CG3849  | P{TRIP.JF02075}attP2   |
| 25876 | lat          | FBgn0005654 | CG4088  | P{TRIP.JF01915}attP2   |
| 32515 | laza         | FBgn0037163 | CG11440 | P{TRIP.HMS00519}attP2  |
| 28374 | lbe          | FBgn0011278 | CG6545  | P{TRIP.JF03011}attP2   |
| 28903 | lbk          | FBgn0034083 | CG8434  | P{TRIP.HM05114}attP2   |
| 35698 | lbl          | FBgn0008651 | CG6570  | P{TRIP.GLV21063}attP2  |
| 27278 | lbn          | FBgn0016032 | CG2374  | P{TRIP.JF02589}attP2   |
| 53269 | LBR          | FBgn0034657 | CG17952 | P{TRIP.HMC02426}attP2  |
| 32019 | Lcch3        | FBgn0010240 | CG17336 | P{TRIP.JF02159}attP2   |
| 32455 | Lcp4         | FBgn0002535 | CG2044  | P{TRIP.HMS00454}attP2  |
| 32353 | lcs          | FBgn0028583 | CG12794 | P{TRIP.HMS00344}attP2  |
| 44460 | ldlCp        | FBgn0026634 | CG6177  | P{TRIP.GLCO1614}attP2  |
| 34980 | lds          | FBgn0002542 | CG2684  | P{TRIP.HMS01389}attP2  |
| 34589 | lea          | FBgn0002543 | CG5481  | P{TRIP.HMS01063}attP2  |
| 56016 | lectin-46Ca  | FBgn0040093 | CG1656  | P{TRIP.HMC04312}attP40 |
| 58183 | lectin-46Cb  | FBgn0040092 | CG1652  | P{TRIP.HMJ22160}attP40 |
| 37502 | Letm1        | FBgn0284252 | CG4589  | P{TRIP.HMS01644}attP40 |
| 28755 | lft          | FBgn0032230 | CG13139 | P{TRIP.JF03183}attP2   |
| 51465 | Lgr1         | FBgn0016650 | CG7665  | P{TRIP.HMC03205}attP2  |
| 27509 | Lgr1         | FBgn0016650 | CG7665  | P{TRIP.JF02659}attP2   |
| 28789 | Lgr3         | FBgn0039354 | CG31096 | P{TRIP.JF03217}attP2   |
| 41983 | lgs          | FBgn0039907 | CG2041  | P{TRIP.HMS02381}attP2  |
| 38240 | Lhr          | FBgn0034217 | CG18468 | P{TRIP.HMS01684}attP40 |
| 31643 | lic          | FBgn0261524 | CG12244 | P{TRIP.JF01433}attP2   |
| 35154 | lic          | FBgn0261524 | CG12244 | P{TRIP.GL00022}attP2   |
| 28944 | lid          | FBgn0031759 | CG9088  | P{TRIP.HM05155}attP2   |
| 51933 | Lig4         | FBgn0030506 | CG12176 | P{TRIP.HMC03211}attP40 |
| 33995 | ligatin      | FBgn0041588 | CG31426 | P{TRIP.HMS00958}attP2  |
| 34592 | lilili       | FBgn0041111 | CG8817  | P{TRIP.HMS01066}attP2  |
| 29341 | Lim1         | FBgn0026411 | CG11354 | P{TRIP.JF02503}attP2   |
| 34962 | Lim3         | FBgn0002023 | CG10699 | P{TRIP.HMS00596}attP2  |
| 42576 | LIMK1        | FBgn0041203 | CG1848  | P{TRIP.HMJ02235}attP40 |
| 40939 | lin          | FBgn0002552 | CG11770 | P{TRIP.HMS02187}attP40 |
| 29564 | lin-28       | FBgn0035626 | CG17334 | P{TRIP.JF03243}attP2   |
| 36712 | lin-52       | FBgn0029800 | CG15929 | P{TRIP.HMS01602}attP2  |
| 29520 | lin19        | FBgn0015509 | CG1877  | P{TRIP.HM05197}attP2   |
| 26711 | Lin29        | FBgn0262636 | CG2052  | P{TRIP.JF02251}attP2   |
| 28925 | Lip4         | FBgn0032264 | CG6113  | P{TRIP.HM05136}attP2   |
| 53868 | Liprin-alpha | FBgn0046704 | CG11199 | P{TRIP.HMC03183}attP40 |
| 41672 | Liprin-beta  | FBgn0036376 | CG10743 | P{TRIP.HMS02206}attP40 |
| 28301 | Liprin-gamma | FBgn0034720 | CG11206 | P{TRIP.JF02932}attP2   |
| 35043 | Lis-1        | FBgn0015754 | CG8440  | P{TRIP.HMS01457}attP2  |
| 25798 | Lk           | FBgn0028418 | CG13480 | P{TRIP.JF01816}attP2   |
| 28357 | Lk6          | FBgn0017581 | CG17342 | P{TRIP.JF02993}attP2   |
| 34362 | lkb1         | FBgn0038167 | CG9374  | P{TRIP.HMS01351}attP2  |
| 25936 | Lkr          | FBgn0035610 | CG10626 | P{TRIP.JF01956}attP2   |
| 35470 | LKR          | FBgn0035610 | CG10626 | P{TRIP.GL00396}attP2   |
| 42871 | lmd          | FBgn0039039 | CG4677  | P{TRIP.HMS02564}attP40 |
| 40857 | lmg          | FBgn0250903 | CG34440 | P{TRIP.HMS02024}attP40 |
| 28790 | Lmpt         | FBgn0261565 | CG42679 | P{TRIP.JF03218}attP2   |
| 43995 | lms          | FBgn0034520 | CG13424 | P{TRIP.HMS02709}attP2  |
| 42613 | Lnk          | FBgn0028717 | CG17367 | P{TRIP.HMS02448}attP2  |
| 32456 | loco         | FBgn0020278 | CG5248  | P{TRIP.HMS00455}attP2  |
| 35152 | lok          | FBgn0019686 | CG10895 | P{TRIP.GL00020}attP2   |
| 26714 | lola         | FBgn0283521 | CG12052 | P{TRIP.JF02254}attP2   |
| 31632 | lolal        | FBgn0022238 | CG5738  | P{TRIP.JF01419}attP2   |
| 35722 | lolal        | FBgn0022238 | CG5738  | P{TRIP.GLV21087}attP2  |
| 40162 | Lon          | FBgn0036892 | CG8798  | P{TRIP.HMS01940}attP40 |

|        |                          |                                     |                             |                        |
|--------|--------------------------|-------------------------------------|-----------------------------|------------------------|
| 54012  | loopin-1                 | FBgn0259795                         | CG4750                      | P(TRIP.HMJ21436)attP40 |
| 32955  | loqs                     | FBgn0032515                         | CG6866                      | P(TRIP.HMS00749)attP2  |
| 38931  | lost                     | FBgn0263594                         | CG14648                     | P(TRIP.GL01090)attP2   |
| 27249  | LpR1                     | FBgn0066101                         | CG31094                     | P(TRIP.JF02551)attP2   |
| 31150  | LpR2                     | FBgn0051092                         | CG31092                     | P(TRIP.JF01627)attP2   |
| 27522  | lqf                      | FBgn0028582                         | CG8532                      | P(TRIP.JF02672)attP2   |
| 35013  | lqfR                     | FBgn0261279                         | CG42250                     | P(TRIP.HMS01423)attP2  |
| 31871  | Lrch                     | FBgn0032633                         | CG6860                      | P(TRIP.HM05264)attP2   |
| 31151  | LRP1                     | FBgn0053087                         | CG33087                     | P(TRIP.JF01628)attP2   |
| 28959  | Lrr47                    | FBgn0010398                         | CG6098                      | P(TRIP.HM05170)attP2   |
| 39019  | Lrrk                     | FBgn0038816                         | CG5483                      | P(TRIP.HMS01937)attP40 |
| 28893  | Lrt                      | FBgn0034540                         | CG11136                     | P(TRIP.HM05103)attP2   |
| 29404  | LS2                      | FBgn0034834                         | CG3162                      | P(TRIP.JF03339)attP2   |
| 34617  | Lsd-2                    | FBgn0030608                         | CG9057                      | P(TRIP.HMS01292)attP2  |
| 29537  | LSm-4                    | FBgn0067622                         | CG33677                     | P(TRIP.HM05217)attP2   |
| 30495  | LSm1                     | FBgn0261067                         | CG4279                      | P(TRIP.HM05238)attP2   |
| 30497  | LSm7                     | FBgn0261068                         | CG13277                     | P(TRIP.HM05240)attP2   |
| 38289  | Isn                      | FBgn0260940                         | CG6637                      | P(TRIP.HMS01747)attP40 |
| 56039  | Lsp1alpha                | FBgn0002562                         | CG2559                      | P(TRIP.HMC04347)attP40 |
| 27042  | Lsp1beta                 | FBgn0002563                         | CG4178                      | P(TRIP.JF02368)attP2   |
| 55389  | Lsp1gamma                | FBgn0002564                         | CG6821                      | P(TRIP.HMC04077)attP40 |
| 44630  | Lst8                     | FBgn0264691                         | CG3004                      | P(TRIP.GLC01412)attP40 |
| 34361  | Lst8                     | FBgn0264691                         | CG3004                      | P(TRIP.HMS01350)attP2  |
| 34871  | It                       | FBgn0002566                         | CG18028                     | P(TRIP.HMS00190)attP2  |
| 38956  | ItD                      | FBgn0002567                         | CG8024                      | P(TRIP.HMS01870)attP40 |
| 29527  | ItI                      | FBgn0268063                         | CG32372                     | P(TRIP.HM05205)attP2   |
| 27084  | luna                     | FBgn0040765                         | CG33473                     | P(TRIP.JF02430)attP2   |
| 31657  | lush                     | FBgn0020277                         | CG8807                      | P(TRIP.JF01450)attP2   |
| 39011  | lute                     | FBgn0262871                         | CG43226                     | P(TRIP.HMS01929)attP40 |
| 37506  | lwr                      | FBgn0010602                         | CG3018                      | P(TRIP.HMS01648)attP40 |
| 37481  | lwr                      | FBgn0010602                         | CG3018                      | P(TRIP.GL00624)attP40  |
| 58077  | LysB,LysC,LysD,LysE,LysS | FBgn0004425,FBgn0004426,FBgn0004427 | CG1165,CG1179,CG1180,CG1181 | P(TRIP.HMJ21969)attP40 |
| 55606  | LysP                     | FBgn0004429                         | CG9116                      | P(TRIP.HMC03743)attP40 |
| 27985  | lz                       | FBgn0002576                         | CG1689                      | P(TRIP.JF02221)attP2   |
| 29378  | m4                       | FBgn0002629                         | CG6099                      | P(TRIP.JF03310)attP2   |
| 37503  | M6                       | FBgn0037092                         | CG7540                      | P(TRIP.HMS01645)attP40 |
| 50644  | mab-21                   | FBgn0029003                         | CG4746                      | P(TRIP.HMC03044)attP2  |
| 100700 | mab-21                   | FBgn0029003                         | CG4746                      | VDRC.100700            |
| 27571  | mAcR-60C                 | FBgn0000037                         | CG4356                      | P(TRIP.JF02725)attP2   |
| 31316  | Mad                      | FBgn0011648                         | CG12399                     | P(TRIP.JF01264)attP2   |
| 35648  | Mad                      | FBgn0011648                         | CG12399                     | P(TRIP.GLV21013)attP2  |
| 35723  | Mad1                     | FBgn0026326                         | CG2072                      | P(TRIP.GLV21088)attP2  |
| 44430  | mad2                     | FBgn0035640                         | CG17498                     | P(TRIP.GLC01381)attP2  |
| 47918  | mad2                     | FBgn0035640                         | CG17498                     | VDRC.47918             |
| 42529  | Madm                     | FBgn0027497                         | CG1098                      | P(TRIP.HMJ02096)attP40 |
| 34793  | mael                     | FBgn0016034                         | CG11254                     | P(TRIP.HMS00102)attP2  |
| 40853  | maf-S                    | FBgn0034534                         | CG9954                      | P(TRIP.HMS02020)attP40 |
| 44514  | MAGE                     | FBgn0037481                         | CG10059                     | P(TRIP.HMC02904)attP2  |
| 33411  | Magi                     | FBgn0034590                         | CG30388                     | P(TRIP.HMS00291)attP2  |
| 28931  | mago                     | FBgn0002736                         | CG9401                      | P(TRIP.HM05142)attP2   |
| 41641  | magu                     | FBgn0262169                         | CG2264                      | P(TRIP.GL01223)attP2   |
| 34912  | mahj                     | FBgn0034641                         | CG10080                     | P(TRIP.HMS01260)attP2  |
| 53017  | Mal-A2                   | FBgn0002569                         | CG8694                      | P(TRIP.HMJ21740)attP40 |
| 41851  | Mal-A5                   | FBgn0050359                         | CG30359                     | P(TRIP.GL01279)attP2   |
| 52910  | Mal-A5                   | FBgn0050359                         | CG30359                     | P(TRIP.HMC03650)attP40 |
| 55193  | Mal-A8                   | FBgn0033297                         | CG8690                      | P(TRIP.HMC03889)attP40 |
| 55346  | Mal-B1                   | FBgn0032381                         | CG14934                     | P(TRIP.HMC04033)attP40 |
| 28046  | mam                      | FBgn0002643                         | CG8118                      | P(TRIP.JF02881)attP2   |
| 37486  | mamo                     | FBgn0267033                         | CG45477                     | P(TRIP.GLV21091)attP2  |
| 51770  | mamo                     | FBgn0267033                         | CG45477                     | P(TRIP.HMC03325)attP40 |
| 32939  | Map205                   | FBgn0002645                         | CG1483                      | P(TRIP.HMS00733)attP2  |
| 32458  | Map60                    | FBgn0010342                         | CG1825                      | P(TRIP.HMS00457)attP2  |
| 41894  | MAPk-Ak2                 | FBgn0013987                         | CG3086                      | P(TRIP.GL01326)attP2   |
| 43988  | Mapmodulin               | FBgn0034282                         | CG5784                      | P(TRIP.HMS00520)attP2  |
| 33709  | Marcal1                  | FBgn0031655                         | CG3753                      | P(TRIP.HMS00587)attP2  |
| 31157  | Marf                     | FBgn0029870                         | CG3869                      | P(TRIP.JF01650)attP2   |
| 33929  | mars                     | FBgn0033845                         | CG17064                     | P(TRIP.HMS00878)attP2  |
| 54475  | mas                      | FBgn0011653                         | CG15002                     | P(TRIP.HMC03732)attP2  |

|       |                 |                         |                |                        |
|-------|-----------------|-------------------------|----------------|------------------------|
| 34571 | mask            | FBgn0043884             | CG33106        | P{TRiP.HMS01045}attP2  |
| 34959 | mats            | FBgn0038965             | CG13852        | P{TRiP.HMS00475}attP2  |
| 34650 | mav             | FBgn0039914             | CG1901         | P{TRiP.HMS01125}attP2  |
| 40851 | Max             | FBgn00117578            | CG9648         | P{TRiP.HMS02018}attP40 |
| 33722 | mbc             | FBgn0015513             | CG10379        | P{TRiP.HMS00604}attP2  |
| 38239 | MBD-like        | FBgn0027950             | CG8208         | P{TRiP.HMS01683}attP40 |
| 30481 | MBD-R2          | FBgn0038016             | CG10042        | P{TRiP.HM05219}attP2   |
| 28550 | mbf1            | FBgn0262732             | CG4143         | P{TRiP.HM05036}attP2   |
| 29585 | mbf             | FBgn0265487             | CG33197        | P{TRiP.JF03264}attP2   |
| 32516 | Mbs             | FBgn0005536             | CG32156        | P{TRiP.HMS00521}attP2  |
| 41713 | mbt             | FBgn0025743             | CG18582        | P{TRiP.HMS02278}attP40 |
| 35771 | Mcm2            | FBgn0014861             | CG7538         | P{TRiP.HMS01520}attP2  |
| 34686 | Mcm3            | FBgn0284442             | CG4206         | P{TRiP.HMS01164}attP2  |
| 41871 | Mcm5            | FBgn00117577            | CG4082         | P{TRiP.GL01301}attP40  |
| 41842 | Mcm6            | FBgn0025815             | CG4039         | P{TRiP.GL01270}attP2   |
| 32867 | Mcm7            | FBgn0020633             | CG4978         | P{TRiP.HMS00654}attP2  |
| 38244 | MCPH1           | FBgn0260959             | CG42572        | P{TRiP.HMS01688}attP40 |
| 36606 | Mdh2            | FBgn0262559             | CG7998         | P{TRiP.GL00566}attP2   |
| 32405 | Mdr49           | FBgn0004512             | CG3879         | P{TRiP.HMS00400}attP2  |
| 35034 | Mdr50           | FBgn0010241             | CG8523         | P{TRiP.HMS01448}attP2  |
| 35035 | Mdr65           | FBgn0004513             | CG10181        | P{TRiP.HMS01449}attP2  |
| 33675 | me31B           | FBgn0004419             | CG4916         | P{TRiP.HMS00539}attP2  |
| 31928 | Med             | FBgn0011655             | CG1775         | P{TRiP.JF02218}attP2   |
| 34662 | MED1            | FBgn0037109             | CG7162         | P{TRiP.HMS01139}attP2  |
| 34031 | MED10           | FBgn0036581             | CG5057         | P{TRiP.HMS01001}attP2  |
| 34083 | MED11           | FBgn0036811             | CG6884         | P{TRiP.HMS01094}attP2  |
| 34575 | MED14           | FBgn0035145             | CG12031        | P{TRiP.HMS01049}attP2  |
| 32517 | MED15           | FBgn0027592             | CG4184         | P{TRiP.HMS00522}attP2  |
| 34012 | MED16           | FBgn0034707             | CG5465         | P{TRiP.HMS00978}attP2  |
| 34664 | MED17           | FBgn0038578             | CG7957         | P{TRiP.HMS01114}attP2  |
| 42634 | MED18           | FBgn0026873             | CG14802        | P{TRiP.HMS02470}attP40 |
| 27559 | MED19           | FBgn0036761             | CG5546         | P{TRiP.JF02713}attP2   |
| 33710 | MED19           | FBgn0036761             | CG5546         | P{TRiP.HMS00588}attP2  |
| 34577 | MED20           | FBgn0013531             | CG18780        | P{TRiP.HMS01051}attP2  |
| 34731 | MED21           | FBgn0040020             | CG17397        | P{TRiP.HMS01211}attP2  |
| 34573 | MED22           | FBgn0040339             | CG3034         | P{TRiP.HMS01047}attP2  |
| 34658 | MED23           | FBgn0034795             | CG3695         | P{TRiP.HMS01135}attP2  |
| 33755 | MED24           | FBgn0035851             | CG7999         | P{TRiP.HMS01097}attP2  |
| 42501 | MED25           | FBgn0038760             | CG12254        | P{TRiP.HMJ02066}attP40 |
| 28572 | MED26           | FBgn0039923             | CG1793         | P{TRiP.HM05058}attP2   |
| 34576 | MED27           | FBgn0037359             | CG1245         | P{TRiP.HMS01050}attP2  |
| 32459 | MED28           | FBgn0039337             | CG5121         | P{TRiP.HMS00458}attP2  |
| 36711 | MED30           | FBgn0035149             | CG17183        | P{TRiP.HMS01601}attP2  |
| 34574 | MED31           | FBgn0037262             | CG1057         | P{TRiP.HMS01048}attP2  |
| 34697 | MED4            | FBgn0035754             | CG8609         | P{TRiP.HMS01176}attP2  |
| 33743 | MED6            | FBgn0024330             | CG9473         | P{TRiP.HMS01081}attP2  |
| 34663 | MED7            | FBgn0051390             | CG31390        | P{TRiP.HMS01140}attP2  |
| 34926 | MED8            | FBgn0034503             | CG13867        | P{TRiP.HMS01275}attP2  |
| 33677 | MED9            | FBgn0260401             | CG42517        | P{TRiP.HMS00541}attP2  |
| 33678 | MED9            | FBgn0260401             | CG42517        | P{TRiP.HMS00542}attP2  |
| 38247 | Mef2            | FBgn0011656             | CG1429         | P{TRiP.HMS01691}attP40 |
| 54038 | mei-217,mei-218 | FBgn0002709,FBgn0028581 | CG33935,CG8923 | P{TRiP.HMJ21481}attP40 |
| 43266 | mei-38          | FBgn0260986             | CG14781        | P{TRiP.HMS01455}attP2  |
| 41934 | mei-41          | FBgn0004367             | CG4252         | P{TRiP.HMS02331}attP40 |
| 55313 | mei-9           | FBgn0002707             | CG3697         | P{TRiP.HMC04000}attP40 |
| 36855 | mei-P26         | FBgn0026206             | CG12218        | P{TRiP.GL01124}attP40  |
| 41660 | mei-S332        | FBgn0002715             | CG5303         | P{TRiP.GL01242}attP2   |
| 50636 | Meics           | FBgn0025874             | CG8474         | P{TRiP.HMC03035}attP2  |
| 28587 | Mekk1           | FBgn0024329             | CG7717         | P{TRiP.HM05075}attP2   |
| 58331 | Meltrin         | FBgn0265140             | CG7649         | P{TRiP.HMJ22461}attP40 |
| 50515 | membrin         | FBgn0260856             | CG4780         | P{TRiP.GL01633}attP2   |
| 38256 | Men             | FBgn0002719             | CG10120        | P{TRiP.HMS01700}attP40 |
| 35486 | Men-b           | FBgn0029155             | CG5889         | P{TRiP.GL00415}attP2   |
| 42005 | Menl-1          | FBgn0029154             | CG7964         | P{TRiP.HMS02406}attP40 |
| 50645 | Menl-2          | FBgn0029154             | CG7964         | VDR.C.50645            |
| 33676 | MEP-1           | FBgn0035357             | CG1244         | P{TRiP.HMS00540}attP2  |
| 34958 | Mer             | FBgn0086384             | CG14228        | P{TRiP.HMS00459}attP2  |
| 28007 | Mer             | FBgn0086384             | CG14228        | P{TRiP.JF02841}attP2   |

|       |            |             |         |                        |
|-------|------------|-------------|---------|------------------------|
| 34033 | Mes-4      | FBgn0039559 | CG4976  | P{TRIP.HMS01004}attP2  |
| 32460 | Mes2       | FBgn0037207 | CG11100 | P{TRIP.HMS00460}attP2  |
| 36605 | Mes4       | FBgn0034726 | CG11301 | P{TRIP.GL00565}attP2   |
| 29380 | MESK2      | FBgn0043070 | CG15669 | P{TRIP.JF03312}attP2   |
| 50509 | MESR3      | FBgn0032694 | CG15162 | P{TRIP.GL01393}attP2   |
| 35618 | MESR4      | FBgn0034240 | CG4903  | P{TRIP.GL00462}attP2   |
| 26205 | Met        | FBgn0002723 | CG1705  | P{TRIP.JF02103}attP2   |
| 35810 | metro      | FBgn0050021 | CG30021 | P{TRIP.GL00471}attP2   |
| 27543 | mew        | FBgn0004456 | CG1771  | P{TRIP.JF02694}attP2   |
| 29536 | Mfap1      | FBgn0035294 | CG1017  | P{TRIP.HM05216}attP2   |
| 52905 | mfas       | FBgn0260745 | CG3359  | P{TRIP.HMC03645}attP40 |
| 51854 | Mfe2       | FBgn0030731 | CG3415  | P{TRIP.HMC03428}attP40 |
| 35689 | mfr        | FBgn0266757 | CG5747  | P{TRIP.HM021054}attP2  |
| 34038 | mfrn       | FBgn0039561 | CG4963  | P{TRIP.HMS01013}attP2  |
| 44444 | MFS10      | FBgn0030452 | CG4330  | P{TRIP.GL01414}attP40  |
| 44033 | MFS17      | FBgn0058263 | CG40263 | P{TRIP.HMS02749}attP40 |
| 33940 | mgl        | FBgn0261260 | CG42611 | P{TRIP.HMS00891}attP2  |
| 41668 | mGluRA     | FBgn0019985 | CG11144 | P{TRIP.HMS02201}attP40 |
| 35729 | Mhc        | FBgn0086783 | CG17927 | P{TRIP.HMS01471}attP2  |
| 51456 | Mhcl       | FBgn0026059 | CG31045 | P{TRIP.HMC03191}attP40 |
| 33419 | Mi-2       | FBgn0262519 | CG8103  | P{TRIP.HMS00301}attP2  |
| 27320 | mib1       | FBgn0036558 | CG5841  | P{TRIP.JF02629}attP2   |
| 31148 | Mical      | FBgn0053208 | CG33208 | P{TRIP.JF01625}attP2   |
| 28595 | MICAL-like | FBgn0036333 | CG11259 | P{TRIP.HM05083}attP2   |
| 50681 | mid        | FBgn0261963 | CG6634  | P{TRIP.HMC03082}attP2  |
| 28385 | milt       | FBgn0262872 | CG43227 | P{TRIP.JF03022}attP2   |
| 38246 | mim        | FBgn0053558 | CG33558 | P{TRIP.HMS01690}attP40 |
| 27059 | Mio        | FBgn0032940 | CG18362 | P{TRIP.JF02400}attP2   |
| 41680 | Mip        | FBgn0036713 | CG6456  | P{TRIP.HMS02244}attP2  |
| 32461 | mip120     | FBgn0033846 | CG6061  | P{TRIP.HMS00461}attP2  |
| 32462 | mip130     | FBgn0023509 | CG3480  | P{TRIP.HMS00462}attP2  |
| 26205 | mip130     | FBgn0023509 | CG3480  | VDR026205              |
| 32834 | mip40      | FBgn0034430 | CG15119 | P{TRIP.HMS00524}attP2  |
| 28067 | miple      | FBgn0027111 | CG1221  | P{TRIP.JF02904}attP2   |
| 51482 | Mipp2      | FBgn0026060 | CG4317  | P{TRIP.HMC03229}attP40 |
| 35014 | mir-10     | FBgn0262424 | CR42977 | P{TRIP.HMS01427}attP2  |
| 32356 | mira       | FBgn0021776 | CG12249 | P{TRIP.HMS00347}attP2  |
| 27695 | Miro       | FBgn0039140 | CG5410  | P{TRIP.JF02775}attP2   |
| 31907 | mirr       | FBgn0014343 | CG10601 | P{TRIP.JF02196}attP2   |
| 38535 | Mis12      | FBgn0035725 | CG18156 | P{TRIP.HMS01753}attP2  |
| 42643 | mit(1)15   | FBgn0004643 | CG9900  | P{TRIP.HMS02479}attP2  |
| 34835 | Mif        | FBgn0067895 | CG43369 | P{TRIP.HMS00151}attP2  |
| 35143 | Mkk4       | FBgn0024326 | CG9738  | P{TRIP.GL00010}attP2   |
| 38951 | Mkp        | FBgn0083992 | CG34099 | P{TRIP.HMS01865}attP2  |
| 38342 | MKP-4      | FBgn0031044 | CG14211 | P{TRIP.HMS01809}attP2  |
| 55627 | Mkp3       | FBgn0036844 | CG14080 | P{TRIP.HMC03771}attP40 |
| 43178 | Mkrn1      | FBgn0029152 | CG7184  | P{TRIP.GL01521}attP2   |
| 27547 | Mlc1       | FBgn0002772 | CG5596  | P{TRIP.JF02698}attP2   |
| 36694 | Mlc2       | FBgn0002773 | CG2184  | P{TRIP.HMS01583}attP2  |
| 31952 | mld        | FBgn0083077 | CG34100 | P{TRIP.JF02244}attP2   |
| 34864 | mle        | FBgn0002774 | CG11680 | P{TRIP.HMS00182}attP2  |
| 41820 | Mlf        | FBgn0034051 | CG8295  | P{TRIP.GL01248}attP2   |
| 32940 | Mlh1       | FBgn0011659 | CG11482 | P{TRIP.HMS00734}attP2  |
| 29381 | Mlp60A     | FBgn0259209 | CG42309 | P{TRIP.JF03313}attP2   |
| 31558 | Mlp84B     | FBgn0014863 | CG1019  | P{TRIP.JF01128}attP2   |
| 31489 | Mmp1       | FBgn0035049 | CG4859  | P{TRIP.JF01336}attP2   |
| 31371 | Mmp2       | FBgn0033438 | CG1794  | P{TRIP.JF01337}attP2   |
| 36657 | mnb        | FBgn0259168 | CG42273 | P{TRIP.HMS01545}attP40 |
| 31220 | Mnn1       | FBgn0031885 | CG13778 | P{TRIP.JF01775}attP2   |
| 35150 | Mnn1       | FBgn0031885 | CG13778 | P{TRIP.GL00018}attP2   |
| 42558 | Mnt        | FBgn0023215 | CG13316 | P{TRIP.HM02214}attP40  |
| 55681 | Mo25       | FBgn0017572 | CG4083  | P{TRIP.HMC03865}attP2  |
| 43204 | Mocs1      | FBgn0263241 | CG33048 | P{TRIP.GL01549}attP40  |
| 28314 | mod        | FBgn0002780 | CG2050  | P{TRIP.JF02945}attP2   |
| 33907 | mod(mdg4)  | FBgn0002781 | CG32491 | P{TRIP.HMS00849}attP2  |
| 38304 | mod(r)     | FBgn0016038 | CG17828 | P{TRIP.HMS01766}attP40 |
| 44476 | modSP      | FBgn0051217 | CG31217 | P{TRIP.HMC02363}attP2  |
| 33936 | Moe        | FBgn0011661 | CG10701 | P{TRIP.HMS00886}attP2  |



|       |            |             |         |                          |
|-------|------------|-------------|---------|--------------------------|
| 33698 | mof        | FBgn0014340 | CG3025  | P{TRiP.HM S00573}attP2   |
| 29429 | mol        | FBgn0086711 | CG4482  | P{TRiP.JF03365}attP2     |
| 36821 | moody      | FBgn0025631 | CG4322  | P{TRiP.GL01050}attP2     |
| 34085 | mop        | FBgn0036448 | CG9311  | P{TRiP.HM S00836}attP2   |
| 34919 | mor        | FBgn0002783 | CG18740 | P{TRiP.HM S01267}attP2   |
| 31059 | morgue     | FBgn0027609 | CG15437 | P{TRiP.JF01507}attP2     |
| 35254 | mos        | FBgn0033773 | CG8767  | P{TRiP.GL00142}attP2     |
| 31567 | Mov34      | FBgn0002787 | CG3416  | P{TRiP.JF01140}attP2     |
| 35411 | Mov34      | FBgn0002787 | CG3416  | P{TRiP.GL00333}attP2     |
| 28299 | mp         | FBgn0260660 | CG42543 | P{TRiP.JF02929}attP2     |
| 34963 | Mp20       | FBgn0002789 | CG4696  | P{TRiP.HM S00630}attP2   |
| 44508 | Mpcp       | FBgn0026409 | CG4994  | P{TRiP.HM C02898}attP2   |
| 34744 | Mpk2       | FBgn0015765 | CG5475  | P{TRiP.HM S01224}attP2   |
| 40856 | mr         | FBgn0002791 | CG3060  | P{TRiP.HM S02023}attP40  |
| 39028 | mrE11      | FBgn0020270 | CG16928 | P{TRiP.HM S01947}attP40  |
| 50628 | mrE11      | FBgn0020270 | CG16928 | TRiP.HM C02995}attP2     |
| 35241 | MRG15      | FBgn0027378 | CG6363  | P{TRiP.GL00333}attP2     |
| 25881 | mri        | FBgn0035107 | CG1216  | P{TRiP.JF01921}attP2     |
| 32847 | mRNA-cap   | FBgn0030566 | CG1810  | P{TRiP.HM S00631}attP2   |
| 38316 | MRP        | FBgn0032456 | CG6214  | P{TRiP.HM S01780}attP2   |
| 58109 | mRpl20     | FBgn0036335 | CG11258 | P{TRiP.HM S022045}attP40 |
| 43220 | mRpl54     | FBgn0034579 | CG9353  | P{TRiP.GL01565}attP40    |
| 51739 | mRpS17     | FBgn0034986 | CG4326  | P{TRiP.GL C01797}attP2   |
| 58194 | mRpS21     | FBgn0044511 | CG32854 | P{TRiP.HM J22164}attP40  |
| 43203 | mRpS24     | FBgn0039159 | CG13608 | P{TRiP.GL01548}attP40    |
| 42938 | mRpS29     | FBgn0034727 | CG3633  | P{TRiP.HM S02631}attP40  |
| 36602 | mRpS5      | FBgn0044510 | CG40049 | P{TRiP.GL00562}attP2     |
| 42537 | Mrf        | FBgn0052296 | CG32296 | P{TRiP.HM J02106}attP40  |
| 35737 | Msh6       | FBgn0036486 | CG7003  | P{TRiP.HM S01479}attP2   |
| 55152 | msi        | FBgn0011666 | CG5099  | P{TRiP.HM C03808}attP40  |
| 8414  | msi        | FBgn0011666 | CG5099  | VDRC.8414                |
| 56044 | Msi        | FBgn0043025 | CG32178 | P{TRiP.HM C04352}attP40  |
| 34998 | msk        | FBgn0026252 | CG7935  | P{TRiP.HM S01408}attP2   |
| 39012 | msl-1      | FBgn0005617 | CG10385 | P{TRiP.HM S01930}attP40  |
| 31627 | msl-2      | FBgn0005616 | CG3241  | P{TRiP.JF01412}attP2     |
| 35390 | msl-2      | FBgn0005616 | CG3241  | P{TRiP.GL00309}attP2     |
| 35272 | msl-3      | FBgn0002775 | CG8631  | P{TRiP.GL00170}attP2     |
| 42518 | msn        | FBgn0010909 | CG16973 | P{TRiP.HM J02084}attP40  |
| 32848 | Msp-300    | FBgn0261836 | CG42768 | P{TRiP.HM S00632}attP2   |
| 29460 | mspo       | FBgn0020269 | CG10145 | P{TRiP.JF03397}attP2     |
| 38990 | msps       | FBgn0027948 | CG5000  | P{TRiP.HM S01906}attP40  |
| 51034 | Msr-110    | FBgn0015766 | CG10596 | P{TRiP.HM J21161}attP40  |
| 29601 | mst        | FBgn0020272 | CG1424  | P{TRiP.JF03280}attP2     |
| 50993 | Mst57Dc    | FBgn0011670 | CG4986  | P{TRiP.HM J21106}attP40  |
| 32849 | Mst77F     | FBgn0086915 | CG3354  | P{TRiP.HM S00633}attP2   |
| 28526 | MstProx    | FBgn0015770 | CG1149  | P{TRiP.HM 05012}attP2    |
| 55297 | mt.ATPase6 | FBgn0013672 | CG34073 | P{TRiP.HM C03984}attP2   |
| 41584 | mtIrrRNA   | FBgn0013686 | CR34094 | P{TRiP.GL00701}attP2     |
| 41583 | mt.srRNA   | FBgn0013688 | CR34096 | P{TRiP.GL00700}attP2     |
| 38224 | MtI2       | FBgn0028707 | CG10692 | P{TRiP.HM S01667}attP40  |
| 34624 | MTA1-like  | FBgn0027951 | CG2244  | P{TRiP.HM S01299}attP2   |
| 37492 | mtacp1     | FBgn0011361 | CG9160  | P{TRiP.HM S01634}attP2   |
| 38986 | Mtch       | FBgn0027786 | CG6851  | P{TRiP.HM S01902}attP40  |
| 34094 | MTF-1      | FBgn0040305 | CG3743  | P{TRiP.HM S00951}attP2   |
| 50582 | mtg        | FBgn0260386 | CG7549  | P{TRiP.GL C01704}attP2   |
| 27495 | mtH        | FBgn0023000 | CG6936  | P{TRiP.JF02645}attP2     |
| 41930 | mthl1      | FBgn0030766 | CG4521  | P{TRiP.HM S02327}attP40  |
| 51753 | mthl10     | FBgn0035132 | CG17061 | P{TRiP.HM C03304}attP2   |
| 44516 | mthl12     | FBgn0045442 | CG32853 | P{TRiP.HM C02906}attP2   |
| 42515 | mthl15     | FBgn0051720 | CG31720 | P{TRiP.HM J02080}attP40  |
| 28017 | mthl15     | FBgn0051720 | CG31720 | P{TRiP.JF02851}attP2     |
| 41887 | mthl3      | FBgn0028956 | CG6530  | P{TRiP.HM S02309}attP40  |
| 55244 | mthl4      | FBgn0034219 | CG6536  | P{TRiP.HM C02422}attP2   |
| 36884 | mthl5      | FBgn0037960 | CG6965  | P{TRiP.GL01051}attP2     |
| 44497 | mthl6      | FBgn0035789 | CG16992 | P{TRiP.HM C02432}attP2   |
| 44498 | mthl7      | FBgn0035847 | CG7476  | P{TRiP.HM C02433}attP2   |
| 36886 | mthl8      | FBgn0052475 | CG32475 | P{TRiP.GL01053}attP2     |
| 51695 | mthl9      | FBgn0035131 | CG17084 | P{TRiP.HM C03141}attP2   |

|       |                |              |         |                           |
|-------|----------------|--------------|---------|---------------------------|
| 28546 | Mtk            | FBgn0014865  | CG8175  | P{TRiP.HM05032}attP2      |
| 35754 | Mtl            | FBgn0039532  | CG5588  | P{TRiP.HMS01500}attP2     |
| 38339 | mtm            | FBgn0025742  | CG9115  | P{TRiP.HMS01806}attP2     |
| 31552 | mtm            | FBgn0025742  | CG9115  | P{TRiP.TRiP.JF01114}attP2 |
| 51731 | MtnB           | FBgn0002869  | CG4312  | P{TRiP.HMC03286}attP2     |
| 53292 | MtnC           | FBgn0038790  | CG5097  | P{TRiP.HMC03508}attP2     |
| 32941 | Mtor           | FBgn0013756  | CG8274  | P{TRiP.HMS00735}attP2     |
| 51872 | Mtp            | FBgn0266369  | CG9342  | P{TRiP.HMC03446}attP40    |
| 35430 | mtrm           | FBgn0010431  | CG18543 | P{TRiP.GL00354}attP2      |
| 35732 | mtRNAPol       | FBgn0261938  | CG4644  | P{TRiP.HMS01474}attP2     |
| 38337 | mts            | FBgn0004177  | CG7109  | P{TRiP.HMS01804}attP2     |
| 50600 | mtSSB          | FBgn0010438  | CG4337  | P{TRiP.GLC01722}attP2     |
| 32376 | mtt            | FBgn00050361 | CG30361 | P{TRiP.HMC00367}attP2     |
| 28054 | mtTFB1         | FBgn0261381  | CG42631 | P{TRiP.JF02890}attP2      |
| 27055 | mtTFB2         | FBgn0037778  | CG3910  | P{TRiP.JF02381}attP2      |
| 34870 | mub            | FBgn0262737  | CG7437  | P{TRiP.HMS00189}attP2     |
| 51467 | Muc12Ea        | FBgn0052602  | CG32602 | P{TRiP.HMC03207}attP2     |
| 44527 | Muc14A         | FBgn0052580  | CG32580 | P{TRiP.HMC02921}attP2     |
| 55394 | Muc18B         | FBgn0031000  | CG7876  | P{TRiP.HMC04082}attP40    |
| 55986 | Muc26B         | FBgn0040950  | CG13990 | P{TRiP.HMC04282}attP40    |
| 28325 | Muc26B         | FBgn0040950  | CG13990 | VDRC.28325                |
| 44499 | Muc68Ca        | FBgn0036181  | CG18331 | P{TRiP.HMC02435}attP2     |
| 50618 | Muc68E         | FBgn0053265  | CG33265 | P{TRiP.HMC02985}attP2     |
| 53018 | Muc91C         | FBgn0038642  | CG7709  | P{TRiP.HMCJ21741}attP40   |
| 35044 | mud            | FBgn0002873  | CG12047 | P{TRiP.HMS01458}attP2     |
| 38190 | mud            | FBgn0002873  | CG12047 | P{TRiP.GL00629}attP40     |
| 33046 | Mulk           | FBgn0260750  | CG31873 | P{TRiP.HMS00699}attP2     |
| 42918 | Mur29B         | FBgn0051901  | CG31901 | P{TRiP.HMS02611}attP40    |
| 44489 | Mur2B          | FBgn0025390  | CG14796 | P{TRiP.HMC02403}attP2     |
| 35236 | mura           | FBgn0037705  | CG9381  | P{TRiP.GL00121}attP2      |
| 43244 | mus101         | FBgn0002878  | CG11156 | P{TRiP.GLC01431}attP2     |
| 31052 | mus201         | FBgn0002887  | CG10890 | P{TRiP.JF01500}attP2      |
| 35652 | mus201         | FBgn0002887  | CG10890 | P{TRiP.GLV21017}attP2     |
| 33043 | mus209         | FBgn0005655  | CG9193  | P{TRiP.HMS00634}attP2     |
| 58299 | mus301         | FBgn0002899  | CG7972  | P{TRiP.HMJ22406}attP40    |
| 58238 | mus308         | FBgn0002905  | CG6019  | P{TRiP.HMJ22259}attP40    |
| 31331 | mus309         | FBgn0002906  | CG6920  | P{TRiP.JF01288}attP2      |
| 34951 | mus312         | FBgn0002909  | CG8601  | P{TRiP.HMS00381}attP2     |
| 51405 | muskelin       | FBgn0033757  | CG8811  | P{TRiP.GLC01768}attP40    |
| 55316 | Mvl            | FBgn0011672  | CG3671  | P{TRiP.HMC04003}attP40    |
| 34862 | mwh            | FBgn0264272  | CG43772 | P{TRiP.HMS00180}attP2     |
| 32446 | mxc            | FBgn0260789  | CG12124 | P{TRiP.HMS00444}attP2     |
| 35053 | Myb            | FBgn0002914  | CG9045  | P{TRiP.HMS01467}attP2     |
| 36107 | Myd88          | FBgn0033402  | CG2078  | P{TRiP.HMS00183}attP2     |
| 41691 | Myo10A         | FBgn0263705  | CG43657 | P{TRiP.HMS02255}attP2     |
| 41717 | Myo28B1        | FBgn0040299  | CG6976  | P{TRiP.HMS02282}attP2     |
| 33971 | Myo31DF        | FBgn0086347  | CG7438  | P{TRiP.HMS00928}attP2     |
| 41689 | Myo61F         | FBgn0010246  | CG9155  | P{TRiP.HMS02253}attP2     |
| 31200 | myoglianiin    | FBgn0026199  | CG1838  | P{TRiP.JF01717}attP2      |
| 36840 | myoglianiin    | FBgn0026199  | CG1838  | P{TRiP.GL01091}attP2      |
| 34688 | MYPT-75D       | FBgn0036801  | CG6896  | P{TRiP.HMS01166}attP2     |
| 33642 | mys            | FBgn0004657  | CG1560  | P{TRiP.HMS00043}attP2     |
| 35312 | Myt1           | FBgn0040298  | CG32417 | P{TRiP.GL00216}attP2      |
| 33616 | N              | FBgn0004647  | CG3936  | P{TRiP.HMS00009}attP2     |
| 31983 | n-syb          | FBgn0013342  | CG17248 | P{TRiP.JF03417}attP2      |
| 25808 | na             | FBgn0002917  | CG1517  | P{TRiP.JF01826}attP2      |
| 44053 | Naam           | FBgn0051216  | CG31216 | P{TRiP.HMS02770}attP40    |
| 39008 | Nab2           | FBgn0028471  | CG5720  | P{TRiP.HMS01925}attP40    |
| 27262 | Nach           | FBgn0024319  | CG8178  | P{TRiP.JF02566}attP2      |
| 26012 | NaCP60E        | FBgn0085434  | CG34405 | P{TRiP.JF02037}attP2      |
| 25835 | nAcRalpha-30D  | FBgn0032151  | CG4128  | P{TRiP.JF01853}attP2      |
| 25943 | nAcRalpha-34E  | FBgn0028875  | CG32975 | P{TRiP.JF01963}attP2      |
| 27671 | nAcRalpha-7E   | FBgn0015519  | CG2302  | P{TRiP.JF02750}attP2      |
| 31985 | nAcRalpha-80B  | FBgn0266347  | CG12414 | P{TRiP.JF03419}attP2      |
| 28688 | nAcRalpha-96Aa | FBgn0000036  | CG5610  | P{TRiP.JF03103}attP2      |
| 27493 | nAcRalpha-96Ab | FBgn0000039  | CG6844  | P{TRiP.JF02643}attP2      |
| 25927 | nAcRbeta-21C   | FBgn0031261  | CG11822 | P{TRiP.JF01947}attP2      |
| 31883 | nAcRbeta-64B   | FBgn0000038  | CG11348 | P{TRiP.JF02158}attP2      |

|        |               |             |         |                        |
|--------|---------------|-------------|---------|------------------------|
| 28038  | nAcRbeta-96A  | FBgn0004118 | CG6798  | P{TRIP.JF02873}attP2   |
| 51683  | nahoda        | FBgn0034797 | CG12781 | P{TRIP.GLC01781}attP40 |
| 38326  | Nak           | FBgn0015772 | CG10637 | P{TRIP.HMS01793}attP2  |
| 31674  | nan           | FBgn0036414 | CG5842  | P{TRIP.JF01467}attP2   |
| 38257  | Nap1          | FBgn0015268 | CG5330  | P{TRIP.HMS01701}attP40 |
| 34003  | NaPi-T        | FBgn0016684 | CG10207 | P{TRIP.HMS00966}attP2  |
| 32357  | NAT1          | FBgn0010488 | CG3845  | P{TRIP.HMS00348}attP2  |
| 34990  | Nat1          | FBgn0031020 | CG12202 | P{TRIP.HMS01400}attP2  |
| 31899  | nau           | FBgn0002922 | CG10250 | P{TRIP.JF03187}attP2   |
| 32963  | Nc            | FBgn0026404 | CG8091  | P{TRIP.HMS00758}attP2  |
| 58992  | Nc            | FBgn0026404 | CG8091  | P{UASp-dr onc-CARD}5A  |
| 33686  | Nc 73EF       | FBgn0010352 | CG11661 | P{TRIP.HMS00554}attP2  |
| 29461  | Nca           | FBgn0013303 | CG7641  | P{TRIP.JF03398}attP2   |
| 28682  | Ncc69         | FBgn0036279 | CG4357  | P{TRIP.JF03097}attP2   |
| 30000  | Ncc69         | FBgn0036279 | CG4357  | VDRC.30000             |
| 58144  | ncd           | FBgn0002924 | CG7831  | P{TRIP.HMJ22094}attP40 |
| 42581  | Nckx30C       | FBgn0028704 | CG18660 | P{TRIP.HMS01955}attP2  |
| 41826  | nclb          | FBgn0263510 | CG6751  | P{TRIP.GL01254}attP2   |
| 27498  | nct           | FBgn0039234 | CG7012  | P{TRIP.JF02648}attP2   |
| 57497  | nct           | FBgn0039234 | CG7012  | P{TRIP.HMC04812}attP40 |
| 30487  | ND23          | FBgn0017567 | CG3944  | P{TRIP.HM05229}attP2   |
| 34526  | ND42          | FBgn0019957 | CG6343  | P{TRIP.HMS00852}attP2  |
| 33911  | ND75          | FBgn0017566 | CG2286  | P{TRIP.HMS00854}attP2  |
| 38260  | Ndc80         | FBgn0030500 | CG9938  | P{TRIP.HMS01704}attP40 |
| 54018  | Ndfip         | FBgn0052177 | CG32177 | P{TRIP.HMJ21444}attP40 |
| 28897  | neb           | FBgn0004374 | CG10718 | P{TRIP.HM05107}attP2   |
| 34741  | Nedd4         | FBgn0259174 | CG42279 | P{TRIP.HMS01221}attP2  |
| 33881  | Nedd8         | FBgn0032725 | CG10679 | P{TRIP.HMS00818}attP2  |
| 36682  | nej           | FBgn0261617 | CG15319 | P{TRIP.HMS01570}attP2  |
| 28600  | Nek2          | FBgn0029970 | CG17256 | P{TRIP.HM05088}attP2   |
| 32897  | Nelf-A        | FBgn0038872 | CG5874  | P{TRIP.HMS00686}attP2  |
| 42547  | NELF-B        | FBgn0027553 | CG32721 | P{TRIP.HMJ02119}attP40 |
| 32835  | Nelf-E        | FBgn0017430 | CG5994  | P{TRIP.HMS00525}attP2  |
| 55960  | Neos          | FBgn0024542 | CG8614  | P{TRIP.HMC04254}attP40 |
| 42145  | Neos          | FBgn0024542 | CG8614  | VDRC.42145             |
| 50930  | Nep3          | FBgn0031081 | CG9565  | P{TRIP.HMJ21024}attP40 |
| 37803  | Nep3          | FBgn0031081 | CG9565  | VDRC.37803             |
| 42909  | Nep5          | FBgn0039478 | CG6265  | P{TRIP.HMS02602}attP40 |
| 25944  | NepYr         | FBgn0004842 | CG5811  | P{TRIP.JF01964}attP2   |
| 28324  | nerfin-1      | FBgn0028999 | CG13906 | P{TRIP.JF02956}attP2   |
| 28551  | nerfin-2      | FBgn0041105 | CG12809 | P{TRIP.HM05037}attP2   |
| 35009  | nesd          | FBgn0032848 | CG10722 | P{TRIP.HMS01419}attP2  |
| 26204  | net           | FBgn0002931 | CG11450 | P{TRIP.JF02102}attP2   |
| 41069  | net           | FBgn0002931 | CG11450 | VDRC.41069             |
| 31665  | NetA          | FBgn0015773 | CG18657 | P{TRIP.JF01458}attP2   |
| 34698  | NetB          | FBgn0015774 | CG10521 | P{TRIP.HMS01177}attP2  |
| 26023  | neur          | FBgn0002932 | CG11988 | P{TRIP.JF02048}attP2   |
| 44094  | Neur14        | FBgn0283503 | CG46284 | P{TRIP.HMS02814}attP2  |
| 40903  | Neurochondrin | FBgn0037447 | CG2330  | P{TRIP.HMS02151}attP40 |
| 28331  | neuroigin     | FBgn0031866 | CG13772 | P{TRIP.JF02966}attP2   |
| 58128  | neuroigin     | FBgn0031866 | CG13772 | P{HMJ22077}attP40      |
| 25991  | Nf-YA         | FBgn0035993 | CG3891  | P{TRIP.JF02013}attP2   |
| 58234  | Nf-YC         | FBgn0029905 | CG3075  | P{TRIP.HMJ22254}attP40 |
| 25845  | Nf1           | FBgn0015269 | CG8318  | P{TRIP.JF01866}attP2   |
| 51422  | NFAT          | FBgn0030505 | CG11172 | P{TRIP.HMC02411}attP2  |
| 31929  | Nfil          | FBgn0042696 | CG2380  | P{TRIP.JF02219}attP2   |
| 53026  | ng3           | FBgn0010295 | CG10788 | P{TRIP.HMJ21751}attP40 |
| 42648  | Nha1          | FBgn0031865 | CG10806 | P{TRIP.HMS02484}attP2  |
| 41897  | Nha1          | FBgn0031865 | CG10806 | P{TRIP.GL01329}attP40  |
| 28589  | Nhe1          | FBgn0026787 | CG12178 | P{TRIP.HM05077}attP2   |
| 51491  | Nhe2          | FBgn0040297 | CG9256  | P{TRIP.HMC03243}attP2  |
| 50513  | Nhe3          | FBgn0028703 | CG11328 | P{TRIP.GL01631}attP2   |
| 100742 | Nhe3          | FBgn0028703 | CG11328 | VDRC.100742            |
| 42479  | NHP2          | FBgn0029148 | CG5258  | P{TRIP.GL01315}attP2   |
| 51784  | NHP2          | FBgn0029148 | CG5258  | P{TRIP.HMC03339}attP40 |
| 50632  | NijA          | FBgn0036101 | CG6449  | P{TRIP.HMC02999}attP40 |
| 50611  | NijB          | FBgn0036822 | CG11637 | P{TRIP.HMC02978}attP2  |
| 42543  | niki          | FBgn0045980 | CG10951 | P{TRIP.HMJ02114}attP40 |

|       |          |             |         |                           |
|-------|----------|-------------|---------|---------------------------|
| 55937 | nimB1    | FBgn0027929 | CG33119 | P(TRIP.HMC04225)attP40    |
| 55963 | nimB4    | FBgn0028542 | CG33115 | P(TRIP.HMC04257)attP40    |
| 51162 | nimB5    | FBgn0028936 | CG16873 | P(TRIP.HMC02406)attP2     |
| 25787 | nimC1    | FBgn0259896 | CG8942  | P(TRIP.JF01793)attP2      |
| 25960 | nimC2    | FBgn0028939 | CG18146 | P(TRIP.JF01980)attP2      |
| 34994 | ninaB    | FBgn0002937 | CG9347  | P(TRIP.HMS01404)attP2     |
| 27693 | ninaC    | FBgn0002938 | CG5125  | P(TRIP.JF02773)attP2      |
| 44652 | ninaD    | FBgn0002939 | CG31783 | P(TRIP.HMC02392)attP2     |
| 31648 | ninaE    | FBgn0002940 | CG4550  | P(TRIP.JF01439)attP2      |
| 34696 | NiPp1    | FBgn0026402 | CG8980  | P(TRIP.HMS01175)attP2     |
| 34849 | Nipped-A | FBgn0053554 | CG33554 | P(TRIP.HMS00167)attP2     |
| 32406 | Nipped-B | FBgn0026401 | CG17704 | P(TRIP.HMS00401)attP2     |
| 34887 | Nipsnap  | FBgn0030724 | CG9212  | P(TRIP.HMS01232)attP2     |
| 38961 | NitFhit  | FBgn0024945 | CG7067  | P(TRIP.HMS01875)attP40    |
| 55285 | NitFhit  | FBgn0024945 | CG7067  | P(TRIP.HMC03972)attP2     |
| 34848 | nito     | FBgn0027548 | CG2910  | P(TRIP.HMS00166)attP2     |
| 31908 | NK7.1    | FBgn0024321 | CG8524  | P(TRIP.JF02197)attP2      |
| 40883 | Nlg1     | FBgn0051146 | CG31146 | P(TRIP.HMS02131)attP40    |
| 33688 | Nlp      | FBgn0016685 | CG7917  | P(TRIP.HMS00556)attP2     |
| 28361 | Nmda1    | FBgn0013305 | CG3798  | P(TRIP.JF02997)attP2      |
| 41667 | Nmdar1   | FBgn0010399 | CG2902  | P(TRIP.HMS02200)attP40    |
| 40928 | Nmdar2   | FBgn0053513 | CG33513 | P(TRIP.HMS02176)attP40    |
| 35295 | nmdyn-D6 | FBgn0030573 | CG5310  | P(TRIP.GL00197)attP2      |
| 35315 | nmdyn-D7 | FBgn0028997 | CG8362  | P(TRIP.GL00221)attP2      |
| 44058 | nmdyn-D7 | FBgn0028997 | CG8362  | P(TRIP.HMS02775)attP40    |
| 29402 | Nmnat    | FBgn0039254 | CG13645 | P(TRIP.JF03337)attP2      |
| 42570 | nmo      | FBgn0011817 | CG7892  | P(TRIP.HMJ02229)attP40    |
| 41586 | nmo      | FBgn0011817 | CG7892  | P(TRIP.GL00703)attP2      |
| 52973 | Nnf1a    | FBgn0034523 | CG13434 | P(TRIP.HMJ21658)attP40    |
| 29370 | noc      | FBgn0005771 | CG4491  | P(TRIP.JF02534)attP2      |
| 28895 | nocte    | FBgn0261710 | CG17255 | P(TRIP.HM05105)attP2      |
| 32407 | noe      | FBgn0026197 | CR32172 | P(TRIP.HMS00402)attP2     |
| 34845 | noi      | FBgn0014366 | CG2925  | P(TRIP.HMS00163)attP2     |
| 27990 | nompA    | FBgn0016047 | CG13207 | P(TRIP.JF02919)attP2      |
| 28665 | nompB    | FBgn0016919 | CG12548 | P(TRIP.JF03080)attP2      |
| 31689 | nompC    | FBgn0016920 | CG11020 | P(TRIP.JF01894)attP2      |
| 52933 | nonA     | FBgn0004227 | CG4211  | P(TRIP.HMC03675)attP40    |
| 52934 | nonA-l   | FBgn0015520 | CG10328 | P(TRIP.HMC03676)attP40    |
| 41945 | nonC     | FBgn0263968 | CG32743 | P(TRIP.HMS02342)attP40    |
| 31094 | nonC     | FBgn0263968 | CG32743 | P(TRIP.JF01559)attP2      |
| 35349 | nonC     | FBgn0263968 | CG32743 | P(TRIP.GL00261)attP2      |
| 35484 | nop5     | FBgn0026196 | CG10206 | P(TRIP.GL00413)attP2      |
| 36595 | Nop60B   | FBgn0259937 | CG3333  | P(TRIP.GL00555)attP2      |
| 57500 | Nop60B   | FBgn0259937 | CG3333  | P(TRIP.HMC04815)attP40    |
| 33694 | Nopp140  | FBgn0037137 | CG7421  | P(TRIP.HMS00564)attP2     |
| 41868 | nord     | FBgn0050418 | CG30418 | P(TRIP.GL01298)attP40     |
| 35668 | nord     | FBgn0050418 | CG30418 | P(TRIP.GLV21033)attP2/TM3 |
| 31197 | norpA    | FBgn0262738 | CG3620  | P(TRIP.JF01713)attP2      |
| 28792 | Nos      | FBgn0011676 | CG6713  | P(TRIP.JF03220)attP2      |
| 33973 | nos      | FBgn0002962 | CG5637  | P(TRIP.HMS00930)attP2     |
| 28725 | not      | FBgn0013717 | CG4166  | P(TRIP.JF03152)attP2      |
| 32836 | Not1     | FBgn0085436 | CG34407 | P(TRIP.HMS00526)attP2     |
| 35650 | Notum    | FBgn0044028 | CG13076 | P(TRIP.GLV21015)attP2     |
| 55379 | Notum    | FBgn0044028 | CG13076 | P(TRIP.HMC04067)attP40    |
| 32902 | Nox      | FBgn0085428 | CG34399 | P(TRIP.HMS00691)attP2     |
| 36672 | NP15.6   | FBgn0027785 | CG6008  | P(TRIP.HMS01560)attP2     |
| 37504 | Npc1a    | FBgn0024320 | CG5722  | P(TRIP.HMS01646)attP40    |
| 38296 | Npc1b    | FBgn0261675 | CG12092 | P(TRIP.HMS01757)attP40    |
| 38237 | Npc2a    | FBgn0031381 | CG7291  | P(TRIP.HMS01681)attP40    |
| 38238 | Npc2b    | FBgn0038198 | CG3153  | P(TRIP.HMS01682)attP40    |
| 27237 | npf      | FBgn0027109 | CG10342 | P(TRIP.JF02555)attP2      |
| 25939 | NPFR1    | FBgn0037408 | CG1147  | P(TRIP.JF01959)attP2      |
| 25872 | Nplp1    | FBgn0035092 | CG3441  | P(TRIP.JF01911)attP2      |
| 29430 | Nplp2    | FBgn0040813 | CG11051 | P(TRIP.JF03366)attP2      |
| 28760 | Nplp3    | FBgn0042201 | CG13061 | P(TRIP.JF03188)attP2      |
| 28793 | Nplp4    | FBgn0040717 | CG15361 | P(TRIP.JF03221)attP2      |
| 37496 | Nrg      | FBgn0264975 | CG1634  | P(TRIP.HMS01638)attP40    |
| 55184 | Nrk      | FBgn0020391 | CG4007  | P(TRIP.HMC03875)attP40    |

|        |          |             |         |                            |
|--------|----------|-------------|---------|----------------------------|
| 52945  | nrm      | FBgn0262509 | CG43079 | P{TRiP.HMJ21612}attP40/Cy  |
| 28742  | Nrt      | FBgn0004108 | CG9704  | P{TRiP.JF03170}attP2       |
| 38275  | nrv1     | FBgn0015776 | CG9258  | P{TRiP.HMS01725}attP40     |
| 37495  | nrv2     | FBgn0015777 | CG9261  | P{TRiP.HMS01637}attP40     |
| 29431  | nrv3     | FBgn0032946 | CG8663  | P{TRiP.JF03367}attP2       |
| 32408  | Nrx-1    | FBgn0038975 | CG7050  | P{TRiP.HMS00403}attP2      |
| 39071  | Nrx-IV   | FBgn0013997 | CG6827  | P{TRiP.HMS01991}attP40     |
| 38192  | Nrx-IV   | FBgn0013997 | CG6827  | P{TRiP.GL00631}attP40      |
| 29622  | ns1      | FBgn0038473 | CG3983  | P{TRiP.JF03301}attP2       |
| 36626  | Ns3      | FBgn0266284 | CG14788 | P{TRiP.GL00586}attP2       |
| 18379  | Ns3      | FBgn0266284 | CG14788 | VDRC.18379                 |
| 50768  | Ns3      | FBgn0266284 | CG14788 | P{UAS-ns3.YFP}3            |
| 34914  | Nsf2     | FBgn0266464 | CG33101 | P{TRiP.HMS01262}attP2      |
| 53003  | NT1      | FBgn0261526 | CG42576 | P{TRiP.HMJ21720}attP40     |
| 55684  | NT5E-2   | FBgn0050104 | CG30104 | P{TRiP.HMC03869}attP40     |
| 31487  | ntc      | FBgn0035461 | CG10855 | P{TRiP.JF01331}attP2       |
| 28633  | Ntf-2    | FBgn0031145 | CG1740  | P{TRiP.JF03048}attP2       |
| 35636  | Ntf-2    | FBgn0031145 | CG1740  | TRiP.GL00483}attP2/TM3, St |
| 27553  | Ntf-2r   | FBgn0032680 | CG10174 | P{TRiP.JF02705}attP2       |
| 28037  | NtR      | FBgn0029147 | CG6698  | P{TRiP.JF02872}attP2       |
| 28338  | nub      | FBgn0085424 | CG34395 | P{TRiP.JF02973}attP2       |
| 44019  | NUCB1    | FBgn0052190 | CG32190 | P{TRiP.HMS02734}attP40     |
| 33382  | nudC     | FBgn0021768 | CG9710  | P{TRiP.HMS00258}attP2      |
| 38954  | nudE     | FBgn0036059 | CG8104  | P{TRiP.HMS01868}attP40     |
| 41860  | nudE     | FBgn0036059 | CG8104  | P{TRiP.GL01288}attP2       |
| 27573  | nuf      | FBgn0013718 | CG33991 | P{TRiP.JF02728}attP2       |
| 44035  | nuf      | FBgn0013718 | CG33991 | TRiP.HMS02751}attP40       |
| 36725  | Nuf2     | FBgn0031886 | CG8902  | P{TRiP.HMS01616}attP40     |
| 41905  | nullo    | FBgn0004143 | CG14426 | P{TRiP.HMS02297}attP2      |
| 17589  | nullo    | FBgn0004143 | CG14426 | VDRC.17589                 |
| 35045  | numb     | FBgn0002973 | CG3779  | P{TRiP.HMS01459}attP2      |
| 58290  | Nup133   | FBgn0039004 | CG6958  | P{TRiP.HMJ22393}attP40     |
| 110194 | Nup133   | FBgn0039004 | CG6958  | VDRC.110194                |
| 32837  | Nup153   | FBgn0061200 | CG4453  | P{TRiP.HMS00527}attP2      |
| 34710  | Nup154   | FBgn0021761 | CG4579  | P{TRiP.HMS01189}attP2      |
| 32391  | Nup160   | FBgn0262647 | CG4738  | P{TRiP.HMS00385}attP2      |
| 33897  | Nup214   | FBgn0010660 | CG3820  | P{TRiP.HMS00837}attP2      |
| 34967  | Nup358   | FBgn0039302 | CG11856 | P{TRiP.HMS00865}attP2      |
| 38357  | Nup44A   | FBgn0033247 | CG8722  | P{TRiP.HMS01825}attP40     |
| 32942  | Nup44A   | FBgn0033247 | CG8722  | P{TRiP.HMS00736}attP2      |
| 34580  | Nup50    | FBgn0033264 | CG2158  | P{TRiP.HMS01054}attP2      |
| 35695  | Nup62    | FBgn0034118 | CG6251  | P{TRiP.GLV21060}attP2      |
| 43189  | Nup62    | FBgn0034118 | CG6251  | P{TRiP.GL01533}attP40      |
| 28315  | Nup75    | FBgn0034310 | CG5733  | P{TRiP.JF02946}attP2       |
| 51758  | Nup93-2  | FBgn0038274 | CG7262  | P{TRiP.HMC03310}attP2      |
| 28562  | Nup98-96 | FBgn0039120 | CG10198 | P{TRiP.HM05048}attP2       |
| 31341  | Nurf-38  | FBgn0016687 | CG4634  | P{TRiP.JF01299}attP2       |
| 35444  | Nurf-38  | FBgn0016687 | CG4634  | P{TRiP.GL00369}attP2       |
| 29413  | nvy      | FBgn0005636 | CG3385  | P{TRiP.JF03349}attP2       |
| 27713  | nwk      | FBgn0263456 | CG43479 | P{TRiP.JF02793}attP2       |
| 33985  | nxf2     | FBgn0036640 | CG4118  | P{TRiP.HMS00945}attP2      |
| 35485  | Nxt1     | FBgn0028411 | CG12752 | P{TRiP.GL00414}attP2       |
| 26283  | O-fut1   | FBgn0033901 | CG12366 | P{TRiP.JF02052}attP2       |
| 51392  | O-fut2   | FBgn0027791 | CG14789 | P{TRiP.HMJ21038}attP40     |
| 40926  | oaf      | FBgn0011818 | CG9884  | P{TRiP.HMS02174}attP40     |
| 38257  | oaf      | FBgn0011818 | CG9884  | VDRC.38257                 |
| 31233  | Oamb     | FBgn0024944 | CG3856  | P{TRiP.JF01732}attP2       |
| 51481  | Oat      | FBgn0022774 | CG8782  | P{TRiP.HMC03226}attP40     |
| 58123  | Oatp26F  | FBgn0051634 | CG31634 | P{TRiP.HMJ22072}attP40     |
| 50736  | Oatp33Ea | FBgn0032433 | CG5427  | P{TRiP.HMS02972}attP2      |
| 44122  | Oatp58Da | FBgn0050277 | CG30277 | P{TRiP.HMS02844}attP2      |
| 44583  | Oatp58Dc | FBgn0034716 | CG3380  | P{TRiP.HMS02880}attP2      |
| 25923  | Oaz      | FBgn0284250 | CG42702 | P{TRiP.JF01943}attP2       |
| 28794  | Obp44a   | FBgn0033268 | CG2297  | P{TRiP.JF03222}attP2       |
| 34023  | Obp50a   | FBgn0050067 | CG30067 | P{TRiP.HMS00993}attP2      |
| 44065  | Obp83b   | FBgn0010403 | CG11422 | P{TRiP.HMS02782}attP40     |
| 42844  | Obp83cd  | FBgn0046878 | CG15582 | P{TRiP.HMS02536}attP40     |
| 55998  | obst-1   | FBgn0052304 | CG32304 | P{TRiP.HMC04294}attP40     |

|        |           |              |         |                        |
|--------|-----------|--------------|---------|------------------------|
| 58170  | obst-J    | FBgn0036940  | CG7348  | P{TRiP.HMJ22147}attP40 |
| 34327  | oc        | FBgn0004102  | CG12154 | P{TRiP.HMS01314}attP2  |
| 54851  | Ocho      | FBgn0040296  | CG3396  | P{TRiP.HMJ21588}attP40 |
| 36681  | ocn       | FBgn0041102  | CG7929  | P{TRiP.HMS01569}attP2  |
| 34722  | Ocrl      | FBgn0023508  | CG3573  | P{TRiP.HMS01201}attP2  |
| 28332  | Oct-TyrR  | FBgn0004514  | CG7485  | P{TRiP.JF02967}attP2   |
| 50701  | Octbeta1R | FBgn0038980  | CG6919  | P{TRiP.HMC03103}attP2  |
| 31107  | Octbeta1R | FBgn0038980  | CG6919  | P{TRiP.JF01572}attP2   |
| 34673  | Octbeta2R | FBgn0038063  | CG33976 | P{TRiP.HMS01151}attP2  |
| 31108  | Octbeta3R | FBgn0250910  | CG42244 | P{TRiP.JF01573}attP2   |
| 35436  | Oda       | FBgn0014184  | CG16747 | P{TRiP.GL00361}attP2   |
| 34328  | odd       | FBgn0002985  | CG3851  | P{TRiP.HMS01315}attP2  |
| 36666  | OdsH      | FBgn0026058  | CG6352  | P{TRiP.HMS01554}attP2  |
| 51852  | Ogg1      | FBgn0027864  | CG1795  | P{TRiP.HMC03426}attP40 |
| 27283  | ogre      | FBgn0004646  | CG3039  | P{TRiP.JF02595}attP2   |
| 33707  | okr       | FBgn0002989  | CG3736  | P{TRiP.HMS00585}attP2  |
| 43196  | olf186-M  | FBgn0015522  | CG14489 | P{TRiP.GL01540}attP40  |
| 29547  | olf413    | FBgn00037153 | CG12673 | P{TRiP.JF02439}attP2   |
| 42560  | Oli       | FBgn0032651  | CG5545  | P{TRiP.HMJ02216}attP40 |
| 29343  | onecut    | FBgn0028996  | CG1922  | P{TRiP.JF02505}attP2   |
| 35025  | onecut    | FBgn0028996  | CG1922  | P{TRiP.HMS01438}attP2  |
| 34706  | opa       | FBgn0003002  | CG1133  | P{TRiP.HMS01185}attP2  |
| 32358  | opa1-like | FBgn0261276  | CG8479  | P{TRiP.HMS00349}attP2  |
| 36120  | Opbp      | FBgn0050443  | CG30443 | P{TRiP.HMS01535}attP2  |
| 43280  | opm       | FBgn0264389  | CG9053  | P{TRiP.HMC02679}attP2  |
| 31910  | Optix     | FBgn0025360  | CG18455 | P{TRiP.JF02199}attP2   |
| 28347  | or        | FBgn0003008  | CG3029  | P{TRiP.JF02983}attP2   |
| 31892  | Or 19a    | FBgn0041626  | CG18859 | P{TRiP.JF02171}attP2   |
| 28050  | Or 23a    | FBgn0026395  | CG9880  | P{TRiP.JF02885}attP2   |
| 29302  | Or 2a     | FBgn0023523  | CG3206  | P{TRiP.JF02442}attP2   |
| 26295  | Or 43a    | FBgn0026389  | CG1854  | P{TRiP.JF02064}attP2   |
| 27274  | Or 47b    | FBgn0026385  | CG13206 | P{TRiP.JF02586}attP2   |
| 27683  | Or 65a    | FBgn0041625  | CG32401 | P{TRiP.JF02763}attP2   |
| 27289  | Or 65b    | FBgn0041624  | CG32402 | P{TRiP.JF02602}attP2   |
| 29584  | Or 65c    | FBgn0041623  | CG32403 | P{TRiP.JF03263}attP2   |
| 31280  | Or 67d    | FBgn0036080  | CG14157 | P{TRiP.JF01221}attP2   |
| 27276  | Or 83c    | FBgn0037399  | CG15581 | P{TRiP.JF02587}attP2   |
| 27038  | Or 88a    | FBgn0038203  | CG14360 | P{TRiP.JF02364}attP2   |
| 25843  | orb       | FBgn0004882  | CG10868 | P{TRiP.JF01864}attP2   |
| 27050  | orb2      | FBgn0264307  | CG43782 | P{TRiP.JF02376}attP2   |
| 43215  | orc2      | FBgn0015270  | CG3041  | P{TRiP.GL01560}attP40  |
| 32409  | Orc4      | FBgn0023181  | CG2917  | P{TRiP.HMS00404}attP2  |
| 51013  | Orc5      | FBgn0015271  | CG7833  | P{TRiP.HMJ21131}attP40 |
| 31279  | OrcO      | FBgn0037324  | CG10609 | P{TRiP.JF01220}attP2   |
| 57583  | Orc2      | FBgn0086365  | CG13610 | P{TRiP.HMC04670}attP40 |
| 36633  | ord       | FBgn0003009  | CG3134  | P{TRiP.GL00593}attP2   |
| 58228  | ord       | FBgn0003009  | CG3134  | P{TRiP.HMJ22248}attP40 |
| 25885  | Ork1      | FBgn0017561  | CG1615  | P{TRiP.JF01926}attP2   |
| 53994  | Ork1      | FBgn0017561  | CG1615  | P{TRiP.HMJ21398}attP40 |
| 25824  | ort       | FBgn0003011  | CG7411  | P{TRiP.JF01842}attP2   |
| 107363 | ort       | FBgn0003011  | CG7411  | VDRC.107363            |
| 33680  | os        | FBgn0004956  | CG5993  | P{TRiP.HMS00545}attP2  |
| 38285  | osa       | FBgn0261885  | CG7467  | P{TRiP.HMS01738}attP40 |
| 43265  | Oscp      | FBgn0016691  | CG4307  | P{TRiP.GLC01454}attP2  |
| 51904  | Oseg1     | FBgn0265102  | CG7161  | P{TRiP.HMC03478}attP40 |
| 51898  | Oseg4     | FBgn0035264  | CG2069  | P{TRiP.HMC03472}attP40 |
| 43380  | Oseg4     | FBgn0035264  | CG2069  | VDRC.43380             |
| 55856  | Oseg5     | FBgn0032891  | CG9333  | P{TRiP.HMC03888}attP40 |
| 43263  | Oseg6     | FBgn0034452  | CG11237 | P{TRiP.GLC01452}attP2  |
| 51887  | Oseg6     | FBgn0034452  | CG11237 | P{TRiP.HMC03461}attP40 |
| 54839  | Osi11     | FBgn0037418  | CG15596 | P{TRiP.HMJ21558}attP40 |
| 43302  | Osi18     | FBgn0037428  | CG1169  | P{TRiP.HMS02675}attP40 |
| 44564  | Osi24     | FBgn0037409  | CG15589 | P{TRiP.HMS02860}attP40 |
| 58127  | Osi6      | FBgn0027527  | CG1151  | P{TRiP.HMJ22076}attP40 |
| 25844  | osk       | FBgn0003015  | CG10901 | P{TRiP.JF01865}attP2   |
| 36903  | osk       | FBgn0003015  | CG10901 | P{TRiP.GL01101}attP2   |
| 58273  | osm-6     | FBgn0031829  | CG9595  | P{TRiP.HMJ22356}attP40 |
| 34628  | Ost48     | FBgn0014868  | CG9022  | P{TRiP.HMS01303}attP2  |

|        |          |             |         |                         |
|--------|----------|-------------|---------|-------------------------|
| 39009  | Ote      | FBgn0266420 | CG5581  | P(TRIP.HMS01926)attP40  |
| 25790  | otk      | FBgn0004839 | CG8967  | P(TRIP.JF01796)attP2    |
| 57582  | otp      | FBgn0015524 | CG10036 | P(TRIP.HMC04659)attP40  |
| 34065  | otu      | FBgn0003023 | CG12743 | P(TRIP.HMS00038)attP2   |
| 42627  | ovo      | FBgn0003028 | CG6824  | P(TRIP.HMS02462)attP40  |
| 38985  | oxt      | FBgn0015360 | CG32300 | P(TRIP.HMS01901)attP40  |
| 42876  | p-cup    | FBgn0030840 | CG12993 | P(TRIP.HMS02569)attP40  |
| 51729  | p120ctn  | FBgn0260799 | CG17484 | P(TRIP.HMC03276)attP2   |
| 28720  | p16-ARC  | FBgn0031437 | CG9881  | P(TRIP.JF03147)attP2    |
| 57776  | p24-1    | FBgn0030341 | CG1967  | P(TRIP.HMC04970)attP40  |
| 29405  | p38b     | FBgn0024846 | CG7393  | P(TRIP.JF03341)attP2    |
| 35252  | p38b     | FBgn0024846 | CG7393  | P(TRIP.GL00140)attP2    |
| 41720  | p53      | FBgn0039044 | CG33336 | P(TRIP.HMS02286)attP2   |
| 41833  | P5CDh1   | FBgn0037138 | CG7145  | P(TRIP.GL01261)attP2    |
| 36127  | pAbp     | FBgn0261619 | CG5119  | P(TRIP.HMS01542)attP40  |
| 34602  | Pabp2    | FBgn0005648 | CG2163  | P(TRIP.HMS00553)attP2   |
| 31944  | pad      | FBgn0038418 | CG10309 | P(TRIP.JF02235)attP2    |
| 108173 | pad      | FBgn0038418 | CG10309 | VDRC.108173             |
| 31511  | pain     | FBgn0060296 | CG15860 | P(TRIP.JF01066)attP2    |
| 41714  | Pak      | FBgn0014001 | CG10295 | P(TRIP.HMS02279)attP40  |
| 42664  | Pak3     | FBgn0044826 | CG14895 | P(TRIP.HMS02500)attP40  |
| 40848  | pan      | FBgn0085432 | CG34403 | P(TRIP.HMS02015)attP40  |
| 37513  | papi     | FBgn0031401 | CG7082  | P(TRIP.HMS01655)attP40  |
| 35377  | Papss    | FBgn0020389 | CG8363  | P(TRIP.GL00291)attP2    |
| 32410  | par-1    | FBgn0260934 | CG8201  | P(TRIP.HMS00405)attP2   |
| 39010  | par-6    | FBgn0026192 | CG5884  | P(TRIP.HMS01928)attP40  |
| 33923  | para     | FBgn0260993 | CG9907  | P(TRIP.HMS00868)attP2   |
| 31188  | Parg     | FBgn0023216 | CG2864  | P(TRIP.JF01703)attP2    |
| 23962  | Parg     | FBgn0023216 | CG2864  | VDRC.23962              |
| 38333  | park     | FBgn0041100 | CG10523 | P(TRIP.HMS01800)attP2   |
| 35792  | Parp     | FBgn0010247 | CG40411 | P(TRIP.HMS00229)attP2   |
| 42831  | parvin   | FBgn0052528 | CG32528 | P(TRIP.HMS02523)attP40  |
| 33972  | pasha    | FBgn0039861 | CG1800  | P(TRIP.HMS00929)attP2   |
| 29581  | Pask     | FBgn0034950 | CG3105  | P(TRIP.JF03260)attP2    |
| 33689  | Past1    | FBgn0016693 | CG6148  | P(TRIP.HMS00557)attP2   |
| 35747  | Patj     | FBgn0067864 | CG12021 | P(TRIP.HMS01489)attP2   |
| 34667  | Patr-1   | FBgn0028470 | CG5208  | P(TRIP.HMS01144)attP2   |
| 36659  | Patronin | FBgn0022085 | CG33130 | P(TRIP.HMS01547)attP2   |
| 31218  | Patsas   | FBgn0029137 | CG6618  | P(TRIP.JF01773)attP2    |
| 8052   | Patsas   | FBgn0029137 | CG6618  | VDRC.23962              |
| 42573  | pav      | FBgn0011692 | CG1258  | P(TRIP.HM.J02232)attP40 |
| 42614  | Pax      | FBgn0041789 | CG31794 | P(TRIP.HMS02449)attP2   |
| 29595  | pb       | FBgn0051481 | CG31481 | P(TRIP.JF03274)attP2    |
| 50664  | pb       | FBgn0051481 | CG31481 | P(TRIP.HMC03065)attP2   |
| 28343  | pbl      | FBgn0003041 | CG8114  | P(TRIP.JF02979)attP2    |
| 29432  | Pbprp2   | FBgn0011280 | CG1668  | P(TRIP.JF03368)attP2    |
| 55924  | pburs    | FBgn0264810 | CG15284 | P(TRIP.HMC04211)attP40  |
| 27141  | pburs    | FBgn0264810 | CG15284 | VDRC.27141              |
| 33964  | Pc       | FBgn0003042 | CG32443 | P(TRIP.HMS00921)attP2   |
| 33981  | Pcaf     | FBgn0020388 | CG4107  | P(TRIP.HMS00941)attP2   |
| 32411  | Pcf11    | FBgn0022063 | CG10228 | P(TRIP.HMS00406)attP2   |
| 32886  | pch2     | FBgn0051453 | CG31453 | P(TRIP.HMS00674)attP2   |
| 38203  | pck      | FBgn0013720 | CG14779 | P(TRIP.GL00642)attP40   |
| 32992  | pcl      | FBgn0011822 | CG13374 | P(TRIP.HMS00792)attP2   |
| 32943  | pcl      | FBgn0011822 | CG13374 | P(TRIP.HMS00737)attP2   |
| 33946  | Pcl      | FBgn0003044 | CG5109  | P(TRIP.HMS00897)attP2   |
| 34690  | pcm      | FBgn0020261 | CG3291  | P(TRIP.HMS01169)attP2   |
| 32971  | Pcmt     | FBgn0086768 | CG2152  | P(TRIP.HMS00768)attP2   |
| 28552  | pcx      | FBgn0003048 | CG3443  | P(TRIP.HM05038)attP2    |
| 51690  | PDCD-5   | FBgn0036580 | CG13072 | P(TRIP.GLC01792)attP2   |
| 43182  | Pdcd4    | FBgn0030520 | CG10990 | P(TRIP.GL01526)attP40   |
| 34611  | Pde11    | FBgn0085370 | CG34341 | P(TRIP.HMS01286)attP2   |
| 28728  | Pde1c    | FBgn0259225 | CG44007 | P(TRIP.JF03155)attP2    |
| 25828  | Pde6     | FBgn0038237 | CG8279  | P(TRIP.JF01846)attP2    |
| 35743  | Pde6     | FBgn0038237 | CG8279  | P(TRIP.HMS01485)attP2   |
| 51892  | Pde8     | FBgn0034886 | CG45019 | P(TRIP.HMC03466)attP40  |
| 32412  | Pde9     | FBgn0259171 | CG42276 | P(TRIP.HMS00407)attP2   |
| 25802  | Pdf      | FBgn0023178 | CG6496  | P(TRIP.JF01820)attP2    |

|       |                 |             |         |                         |
|-------|-----------------|-------------|---------|-------------------------|
| 42508 | Pdfr            | FBgn0260753 | CG13758 | P{TRIP.HM.J02073}attP40 |
| 55272 | pdgy            | FBgn0027601 | CG9009  | P{TRIP.HM.C03959}attP40 |
| 28039 | Pdi             | FBgn0014002 | CG6988  | P{TRIP.JF02874}attP2    |
| 28635 | Pdk             | FBgn0017558 | CG8808  | P{TRIP.JF03050}attP2    |
| 34936 | Pdk1            | FBgn0020386 | CG1210  | P{TRIP.HM.S01250}attP2  |
| 29543 | pdm2            | FBgn0004394 | CG12287 | P{TRIP.JF02405}attP2    |
| 50665 | pdm2            | FBgn0004394 | CG12287 | P{TRIP.HM.C03066}attP2  |
| 35726 | pdm3            | FBgn0261588 | CG42698 | P{TRIP.HM.S01468}attP2  |
| 38972 | Pdp             | FBgn0029958 | CG12151 | P{TRIP.HM.S01888}attP2  |
| 40863 | Pdp1            | FBgn0016694 | CG17888 | P{TRIP.HM.S02030}attP40 |
| 35632 | pds5            | FBgn0260012 | CG17509 | P{TRIP.GL00479}attP2    |
| 29592 | Pdsw            | FBgn0021967 | CG8844  | P{TRIP.JF03271}attP2    |
| 32838 | pea             | FBgn0086895 | CG8241  | P{TRIP.HM.S00528}attP2  |
| 33943 | peb             | FBgn0003053 | CG12212 | P{TRIP.HM.S00894}attP2  |
| 55390 | Peb             | FBgn0004181 | CG2668  | P{TRIP.HM.C04078}attP40 |
| 55933 | Peblll          | FBgn0011695 | CG11390 | P{TRIP.HM.C04221}attP40 |
| 42499 | PEK             | FBgn0037327 | CG2087  | P{TRIP.HM.J02063}attP40 |
| 27692 | Pen             | FBgn0011823 | CG4799  | P{TRIP.JF02772}attP2    |
| 38290 | pen             | FBgn0015527 | CG1685  | P{TRIP.HM.S01748}attP40 |
| 35439 | pen             | FBgn0015527 | CG1685  | P{TRIP.GL00364}attP2    |
| 27298 | pen-2           | FBgn0053198 | CG33198 | P{TRIP.JF02608}attP2    |
| 32944 | Pep             | FBgn0004401 | CG6143  | P{TRIP.HM.S00738}attP2  |
| 40878 | per             | FBgn0003068 | CG2647  | P{TRIP.HM.S02045}attP2  |
| 51045 | Peritrophin-15a | FBgn0040959 | CG17814 | P{TRIP.HM.J21178}attP40 |
| 56019 | Peritrophin-15b | FBgn0040958 | CG31893 | P{TRIP.HM.C04315}attP40 |
| 50612 | pes             | FBgn0031969 | CG7228  | P{TRIP.HM.C02979}attP2  |
| 28979 | pex1            | FBgn0013563 | CG6760  | P{TRIP.HM.S05190}attP2  |
| 51826 | Pex10           | FBgn0035233 | CG7864  | P{TRIP.HM.C03398}attP2  |
| 42883 | Pex11           | FBgn0034058 | CG8315  | P{TRIP.HM.S02576}attP40 |
| 53308 | Pex12           | FBgn0031282 | CG3639  | P{TRIP.HM.C03536}attP2  |
| 50697 | Pex13           | FBgn0033812 | CG4663  | P{TRIP.HM.C03099}attP2  |
| 57495 | Pex16           | FBgn0037019 | CG3947  | P{TRIP.HM.C04810}attP2  |
| 50702 | Pex19           | FBgn0032407 | CG5325  | P{TRIP.HM.C03104}attP2  |
| 22064 | Pex19           | FBgn0032407 | CG5325  | VDR.C.22064             |
| 50694 | Pex3            | FBgn0036484 | CG6859  | P{TRIP.HM.C03096}attP2  |
| 42854 | Pex5            | FBgn0023516 | CG14815 | P{TRIP.HM.S02546}attP40 |
| 33919 | Pez             | FBgn0031799 | CG9493  | P{TRIP.HM.S00862}attP2  |
| 31914 | pkf             | FBgn0035405 | CG15812 | P{TRIP.JF02204}attP2    |
| 34336 | Pfk             | FBgn0003071 | CG4001  | P{TRIP.HM.S01324}attP2  |
| 35380 | Pfmx            | FBgn0027621 | CG3400  | P{TRIP.HM.C00295}attP2  |
| 33346 | Pgam5           | FBgn0023517 | CG14816 | P{TRIP.HM.S00212}attP2  |
| 50565 | pgant5          | FBgn0031681 | CG31651 | P{TRIP.GLC01685}attP2   |
| 32463 | pgant6          | FBgn0035375 | CG2103  | P{TRIP.HM.S00463}attP2  |
| 33264 | pgant6          | FBgn0035375 | CG2103  | VDR.C.33264             |
| 33720 | pgc             | FBgn0016053 | CG32885 | P{TRIP.HM.S00601}attP2  |
| 51804 | Pgi             | FBgn0003074 | CG8251  | P{TRIP.HM.C03362}attP40 |
| 33633 | Pgk             | FBgn0250906 | CG3127  | P{TRIP.HM.S00031}attP2  |
| 26303 | Pglym78         | FBgn0014869 | CG1721  | P{TRIP.JF02073}attP2    |
| 34345 | Pgm             | FBgn0003076 | CG5165  | P{TRIP.HM.S01333}attP2  |
| 33383 | PGRP-LC         | FBgn0035976 | CG4432  | P{TRIP.HM.S00259}attP2  |
| 34892 | PGRP-LD         | FBgn0260458 | CG33717 | P{TRIP.HM.S01237}attP2  |
| 50934 | PGRP-SB1        | FBgn0043578 | CG9681  | P{TRIP.HM.J21028}attP40 |
| 56982 | PGRP-SB2        | FBgn0043577 | CG9697  | P{TRIP.HM.C04422}attP40 |
| 57184 | PGRP-SC 1a      | FBgn0043576 | CG14746 | P{TRIP.HM.C04566}attP40 |
| 56915 | PGRP-SC 2       | FBgn0043575 | CG14745 | P{TRIP.HM.C04353}attP40 |
| 56962 | PGRP-SD         | FBgn0035806 | CG7496  | P{TRIP.HM.C04403}attP40 |
| 31190 | ph-d            | FBgn0004860 | CG3895  | P{TRIP.JF01705}attP2    |
| 33669 | ph-p            | FBgn0004861 | CG18412 | P{TRIP.HM.S00082}attP2  |
| 33896 | PH4alphaEFB     | FBgn0039776 | CG31022 | P{TRIP.HM.S00835}attP2  |
| 54805 | Phae2           | FBgn0263235 | CG16997 | P{TRIP.HM.J21499}attP40 |
| 41700 | pHCl            | FBgn0264908 | CG44099 | P{TRIP.HM.S02265}attP40 |
| 51832 | PHDP            | FBgn0025334 | CG11182 | P{TRIP.HM.C03404}attP2  |
| 33939 | PHGPx           | FBgn0035438 | CG12013 | P{TRIP.HM.S00890}attP2  |
| 35490 | Phk-3           | FBgn0035089 | CG9358  | P{TRIP.GL00419}attP2    |
| 35311 | PhKgam ma       | FBgn0011754 | CG1830  | P{TRIP.GL00214}attP2    |
| 42500 | PhKgam ma       | FBgn0011754 | CG1830  | P{TRIP.HM.J02065}attP40 |
| 31038 | phi             | FBgn0003079 | CG2845  | P{TRIP.JF01483}attP2    |
| 41589 | phi             | FBgn0003079 | CG2845  | P{TRIP.GL01125}attP40   |



|       |              |             |         |                        |
|-------|--------------|-------------|---------|------------------------|
| 57399 | Phlpp        | FBgn0032749 | CG10493 | P[TRIP.HMC04703]attP40 |
| 55392 | Phm          | FBgn0019948 | CG3832  | P[TRIP.HMC04080]attP40 |
| 31609 | pho          | FBgn0002521 | CG17743 | P[TRIP.JF01393]attP2   |
| 35206 | pho          | FBgn0002521 | CG17743 | P[TRIP.GL00082]attP2   |
| 27676 | phr          | FBgn0003082 | CG11205 | P[TRIP.JF02755]attP2   |
| 43631 | phrf         | FBgn0028579 | CG3268  | P[TRIP.GL01175]attP2   |
| 29433 | phyl         | FBgn0013725 | CG10108 | P[TRIP.JF03369]attP2   |
| 38991 | Pi3K21B      | FBgn0020622 | CG2699  | P[TRIP.HMS01907]attP40 |
| 33384 | Pi3K59F      | FBgn0015277 | CG5373  | P[TRIP.HMS00261]attP2  |
| 34621 | Pi3K68D      | FBgn0015278 | CG11621 | P[TRIP.HMS01296]attP2  |
| 27690 | Pi3K92E      | FBgn0015279 | CG4141  | P[TRIP.JF02770]attP2   |
| 35278 | Pi4K1Ialpha  | FBgn0037339 | CG2929  | P[TRIP.GL00179]attP2   |
| 38242 | Pi4K1IIalpha | FBgn0261922 | CG10260 | P[TRIP.HMS01686]attP40 |
| 41997 | pic          | FBgn0260962 | CG7769  | P[TRIP.HMS02398]attP40 |
| 31258 | PICK1        | FBgn0032447 | CG6167  | P[TRIP.JF01199]attP2   |
| 25920 | Picot        | FBgn0024315 | CG8098  | P[TRIP.JF01940]attP2   |
| 36705 | Pif1A        | FBgn0261015 | CG42599 | P[TRIP.HMS01595]attP2  |
| 36705 | Pif1B        | FBgn0046874 | CG33720 | P[TRIP.HMS01595]attP2  |
| 50986 | PIG-U        | FBgn0032052 | CG13089 | P[TRIP.HMJ21096]attP40 |
| 54058 | Pig1         | FBgn0003086 | CG10790 | P[TRIP.HMJ21201]attP40 |
| 44507 | pigeon       | FBgn0010309 | CG10739 | P[TRIP.HMC02897]attP2  |
| 51490 | pigs         | FBgn0029881 | CG3973  | P[TRIP.HMC03241]attP2  |
| 41671 | Pink1        | FBgn0029891 | CG4523  | P[TRIP.HMS02204]attP2  |
| 43971 | Pino         | FBgn0016926 | CG4710  | P[TRIP.GL01581]attP2   |
| 34613 | pip          | FBgn0003089 | CG9614  | P[TRIP.HMS01288]attP2  |
| 29383 | Pis          | FBgn0030670 | CG9245  | P[TRIP.JF03315]attP2   |
| 55602 | Pis          | FBgn0030670 | CG9245  | P[TRIP.GL01830]attP40  |
| 43984 | pit          | FBgn0025140 | CG6375  | P[TRIP.GLC01465]attP2  |
| 35724 | pita         | FBgn0034878 | CG3941  | P[TRIP.GLV21089]attP2  |
| 57732 | pita         | FBgn0034878 | CG3941  | P[TRIP.HMC04921]attP40 |
| 35157 | Pitslr       | FBgn0016696 | CG4268  | P[TRIP.GL00025]attP2   |
| 33724 | piwi         | FBgn0004872 | CG6122  | P[TRIP.HMS00606]attP2  |
| 31601 | pix          | FBgn0086706 | CG5651  | P[TRIP.JF01190]attP2   |
| 32413 | pk           | FBgn0003090 | CG11084 | P[TRIP.HMS00408]attP2  |
| 28757 | Pk17E        | FBgn0283473 | CG7001  | P[TRIP.JF03185]attP2   |
| 35178 | Pk17E        | FBgn0283473 | CG7001  | P[TRIP.GL00049]attP2   |
| 27539 | Pk1r         | FBgn0038201 | CG9918  | P[TRIP.JF02690]attP2   |
| 32464 | Pk92B        | FBgn0014006 | CG4720  | P[TRIP.HMS00464]attP2  |
| 35331 | Pk92B        | FBgn0014006 | CG4720  | P[TRIP.GL00238]attP2   |
| 31277 | Pka-C1       | FBgn0000273 | CG4379  | P[TRIP.JF01218]attP2   |
| 35169 | Pka-C1       | FBgn0000273 | CG4379  | P[TRIP.GL00038]attP2   |
| 31243 | Pka-C2       | FBgn0000274 | CG12066 | P[TRIP.JF01756]attP2   |
| 31656 | Pka-C2       | FBgn0000274 | CG12066 | P[TRIP.JF01448]attP2   |
| 39050 | Pka-C3       | FBgn0000489 | CG6117  | P[TRIP.HMS01970]attP2  |
| 27708 | Pka-R1       | FBgn0259243 | CG42341 | P[TRIP.JF02788]attP2   |
| 34983 | Pka-R2       | FBgn0022382 | CG15862 | P[TRIP.HMS01393]attP2  |
| 55333 | pkaap        | FBgn0040079 | CG4132  | P[TRIP.HMC04020]attP40 |
| 21792 | pkaap        | FBgn0040079 | CG4132  | VDRC.21792             |
| 34716 | Pkc53E       | FBgn0003091 | CG6622  | P[TRIP.HMS01195]attP2  |
| 29311 | Pkc98E       | FBgn0003093 | CG1954  | P[TRIP.JF02470]attP2   |
| 28355 | Pkcdelta     | FBgn0259680 | CG42349 | P[TRIP.JF02991]attP2   |
| 28717 | PKD          | FBgn0038603 | CG7125  | P[TRIP.JF03144]attP2   |
| 31675 | Pkd2         | FBgn0041195 | CG6504  | P[TRIP.JF01468]attP2   |
| 27686 | Pkg21D       | FBgn0000442 | CG3324  | P[TRIP.JF02766]attP2   |
| 42567 | Pkn          | FBgn0020621 | CG2049  | P[TRIP.HMJ02226]attP40 |
| 31136 | Plap         | FBgn0024314 | CG5105  | P[TRIP.JF01611]attP2   |
| 33719 | Plc21C       | FBgn0004611 | CG4574  | P[TRIP.HMS00600]attP2  |
| 32839 | Pld          | FBgn0286511 | CG12110 | P[TRIP.HMS00529]attP2  |
| 25796 | ple          | FBgn0005626 | CG10118 | P[TRIP.JF01813]attP2   |
| 30483 | plexA        | FBgn0025741 | CG11081 | P[TRIP.HMS05221]attP2  |
| 28911 | plexB        | FBgn0025740 | CG17245 | P[TRIP.HMS05122]attP2  |
| 36787 | Pli          | FBgn0025574 | CG5212  | P[TRIP.GL00524]attP2   |
| 40913 | Plip         | FBgn0039111 | CG10371 | P[TRIP.HMS02161]attP2  |
| 41935 | pll          | FBgn0010441 | CG5974  | P[TRIP.HMS02332]attP40 |
| 34911 | Plod         | FBgn0036147 | CG6199  | P[TRIP.HMS01259]attP2  |
| 51844 | plu          | FBgn0003114 | CG9183  | P[TRIP.HMC03417]attP40 |
| 57541 | Plzf         | FBgn0032401 | CG6792  | P[TRIP.HMC04858]attP40 |
| 31572 | PMCA         | FBgn0259214 | CG42314 | P[TRIP.JF01145]attP2   |

|       |              |             |         |                        |
|-------|--------------|-------------|---------|------------------------|
| 34892 | Pmi          | FBgn0044419 | CG33718 | P(TRIP.HMS01237)attP2  |
| 57737 | Pmm45A       | FBgn0033377 | CG8073  | P(TRIP.HMC04927)attP40 |
| 34349 | Pmp70        | FBgn0031069 | CG12703 | P(TRIP.HMS01338)attP2  |
| 55614 | Pms2         | FBgn0011660 | CG8169  | P(TRIP.HMC03753)attP40 |
| 28936 | pncr002:3R   | FBgn0063127 | CR33938 | P(TRIP.HM05147)attP2   |
| 28957 | pncr003:2L   | FBgn0047133 | CR31696 | P(TRIP.HM05168)attP2   |
| 28547 | pncr004:X    | FBgn0047095 | CR33939 | P(TRIP.HM05033)attP2   |
| 29526 | pncr008:3L   | FBgn0047000 | CR33946 | P(TRIP.HM05204)attP2   |
| 56879 | pncr009:3L   | FBgn0062928 | CR33940 | P(TRIP.HMC04100)attP40 |
| 28970 | pncr011:3L   | FBgn0083068 | CR33947 | P(TRIP.HM05181)attP2   |
| 28591 | pncr013:4    | FBgn0262731 | CR33941 | P(TRIP.HM05079)attP2   |
| 28941 | pncr015:3L   | FBgn0063083 | CR33948 | P(TRIP.HM05152)attP2   |
| 30509 | pncr016:2R   | FBgn0062961 | CR33942 | P(TRIP.HM05253)attP2   |
| 28593 | pncr017:3R   | FBgn0046756 | CR33945 | P(TRIP.HM05081)attP2   |
| 42535 | png          | FBgn0000826 | CG11420 | P(TRIP.HMJ02104)attP40 |
| 42592 | Pngl         | FBgn0033050 | CG7865  | P(TRIP.HMS02424)attP40 |
| 55743 | Pnn          | FBgn0037737 | CG8383  | P(TRIP.HMC03928)attP40 |
| 34659 | pnr          | FBgn0003117 | CG3978  | P(TRIP.HMS01136)attP2  |
| 31936 | pnt          | FBgn0003118 | CG17077 | P(TRIP.JF02227)attP2   |
| 35038 | pnt          | FBgn0003118 | CG17077 | P(TRIP.HMS01452)attP2  |
| 30485 | PNUTS        | FBgn0053526 | CG33526 | P(TRIP.HM05223)attP2   |
| 25787 | PNUTS        | FBgn0053526 | CG33526 | VDRC_25787             |
| 41705 | pod1         | FBgn0029903 | CG4532  | P(TRIP.HMS02270)attP2  |
| 32945 | poe          | FBgn0011230 | CG14472 | P(TRIP.HMS00739)attP2  |
| 37508 | Pof          | FBgn0035047 | CG3691  | P(TRIP.HMS01650)attP40 |
| 51705 | pog          | FBgn0051660 | CG31660 | P(TRIP.HMC03192)attP40 |
| 43135 | pog          | FBgn0051660 | CG31660 | P(TRIP.GL01473)attP2   |
| 36702 | polo         | FBgn0003124 | CG12306 | P(TRIP.HMS01591)attP2  |
| 32840 | polybromo    | FBgn0039227 | CG11375 | P(TRIP.HMS00531)attP2  |
| 51399 | Pomp         | FBgn0032884 | CG9324  | P(TRIP.GL01750)attP2   |
| 35046 | pon          | FBgn0025739 | CG3346  | P(TRIP.HMS01460)attP2  |
| 50972 | pont         | FBgn0040078 | CG4003  | P(TRIP.HMJ21078)attP40 |
| 30492 | Pop2         | FBgn0036239 | CG5684  | P(TRIP.HM05235)attP2   |
| 43236 | por          | FBgn0004957 | CG6205  | P(TRIP.GL01423)attP2   |
| 29572 | porin        | FBgn0004363 | CG6647  | P(TRIP.JF03251)attP2   |
| 25886 | Porin2       | FBgn0069354 | CG17137 | P(TRIP.JF01927)attP2   |
| 26757 | Poxm         | FBgn0003129 | CG9610  | P(TRIP.JF02321)attP2   |
| 26238 | Poxn         | FBgn0003130 | CG8246  | P(TRIP.JF02136)attP2   |
| 32465 | Pp1-13C      | FBgn0003132 | CG9156  | P(TRIP.HMS00465)attP2  |
| 23701 | Pp1-13C      | FBgn0003132 | CG9156  | P(UAS-Pp1-13C.HA)3     |
| 32414 | Pp1-87B      | FBgn0004103 | CG5650  | P(TRIP.HMS00409)attP2  |
| 58098 | Pp1-Y1       | FBgn0261399 | CG41534 | P(TRIP.HMJ22013)attP40 |
| 51020 | Pp1-Y2       | FBgn0046698 | CG40448 | P(TRIP.HMJ21145)attP40 |
| 42641 | Pp1alpha-96A | FBgn0003134 | CG6593  | P(TRIP.HMS02477)attP40 |
| 29384 | Pp2A-29B     | FBgn0260439 | CG17291 | P(TRIP.JF03316)attP2   |
| 30512 | PP2A-B'      | FBgn0042693 | CG7913  | P(TRIP.HM05256)attP2   |
| 40872 | Pp2B-14D     | FBgn0011826 | CG9842  | P(TRIP.HMS02039)attP2  |
| 40827 | Pp2C1        | FBgn0022768 | CG2984  | P(TRIP.HMS01887)attP2  |
| 38372 | Pp4-19C      | FBgn0023177 | CG32505 | P(TRIP.HMS01841)attP2  |
| 31357 | ppa          | FBgn0020257 | CG9952  | P(TRIP.JF01315)attP2   |
| 35376 | Ppat-Dpck    | FBgn0035632 | CG10575 | P(TRIP.GL00290)attP2   |
| 28778 | Ppcs         | FBgn0261285 | CG5629  | P(TRIP.JF03206)attP2   |
| 40601 | Ppcs         | FBgn0261285 | CG5629  | VDRC_40601             |
| 42794 | PpD3         | FBgn0005777 | CG8402  | P(TRIP.GL01164)attP2   |
| 31911 | Pph13        | FBgn0023489 | CG2819  | P(TRIP.JF02200)attP2   |
| 29571 | ppk          | FBgn0020258 | CG3478  | P(TRIP.JF03250)attP2   |
| 27256 | ppk10        | FBgn0065110 | CG34042 | P(TRIP.JF02565)attP2   |
| 26253 | ppk11        | FBgn0065109 | CG34058 | P(TRIP.JF02152)attP2   |
| 27092 | ppk12        | FBgn0034730 | CG10972 | P(TRIP.JF02027)attP2   |
| 25817 | ppk13        | FBgn0053508 | CG33508 | P(TRIP.JF01835)attP2   |
| 27091 | ppk14        | FBgn0031803 | CG9501  | P(TRIP.JF02438)attP2   |
| 25890 | ppk16        | FBgn0065108 | CG34059 | P(TRIP.JF01931)attP2   |
| 25887 | ppk19        | FBgn0039679 | CG18287 | P(TRIP.JF01928)attP2   |
| 25897 | ppk20        | FBgn0039676 | CG7577  | P(TRIP.JF01938)attP2   |
| 25849 | ppk21        | FBgn0039675 | CG12048 | P(TRIP.JF01870)attP2   |
| 28350 | ppk23        | FBgn0030844 | CG8527  | P(TRIP.JF02986)attP2   |
| 27088 | ppk25        | FBgn0053349 | CG33349 | P(TRIP.JF02434)attP2   |
| 31878 | ppk28        | FBgn0030795 | CG4805  | P(TRIP.JF02153)attP2   |

|       |             |             |         |                        |
|-------|-------------|-------------|---------|------------------------|
| 44412 | ppk28       | FBgn0030795 | CG4805  | VDRC.44412             |
| 25880 | ppk6        | FBgn0034489 | CG11209 | P(TRIP.JF01919)attP2   |
| 25922 | ppk7        | FBgn0031802 | CG9499  | P(TRIP.JF01942)attP2   |
| 27700 | ppl         | FBgn0027945 | CG7758  | P(TRIP.JF02780)attP2   |
| 41987 | Ppm1        | FBgn0035143 | CG12169 | P(TRIP.HMS02386)attP40 |
| 57402 | PpN58A      | FBgn0025573 | CG3245  | P(TRIP.HMC04706)attP40 |
| 51777 | Ppox        | FBgn0020018 | CG5796  | P(TRIP.HMC03332)attP40 |
| 42015 | PPP4R2r     | FBgn0030208 | CG2890  | P(TRIP.HMS02416)attP40 |
| 33882 | Ppr-Y       | FBgn0046697 | CG40440 | P(TRIP.HMS00819)attP2  |
| 38529 | pps         | FBgn0082831 | CG6525  | P(TRIP.HMS01741)attP2  |
| 25952 | Ppt1        | FBgn0030057 | CG12108 | P(TRIP.JF01972)attP2   |
|       | Ppt1        | FBgn0030057 | CG12108 | S77F                   |
| 28362 | Ppt2        | FBgn0032358 | CG4851  | P(TRIP.JF02998)attP2   |
| 36064 | PpV         | FBgn0003139 | CG12217 | P(TRIP.GL00398)attP2   |
| 57765 | PpV         | FBgn0003139 | CG12217 | P(TRIP.HMC04959)attP40 |
| 57519 | PpY-55A     | FBgn0003140 | CG10930 | P(TRIP.HMC04834)attP40 |
| 54852 | PQBP1       | FBgn0039270 | CG11820 | P(TRIP.HMJ21589)attP40 |
| 53346 | pr          | FBgn0003141 | CG16784 | P(TRIP.HMC03575)attP40 |
| 35322 | pr-set7     | FBgn0011474 | CG3307  | P(TRIP.GL00228)attP2   |
| 41931 | PR2         | FBgn0263998 | CG43741 | P(TRIP.HMS02328)attP40 |
| 35422 | Prat        | FBgn0004901 | CG2867  | P(TRIP.GL00345)attP2   |
| 51492 | Prat2       | FBgn0041194 | CG10078 | P(TRIP.HMC03244)attP2  |
| 33965 | prd         | FBgn0003145 | CG6716  | P(TRIP.HMS00922)attP2  |
| 50706 | Prestin     | FBgn0036770 | CG5485  | P(TRIP.HMC03108)attP2  |
| 39004 | primo-1     | FBgn0040077 | CG33748 | P(TRIP.HMS01920)attP2  |
| 39004 | primo-2     | FBgn0040076 | CG33747 | P(TRIP.HMS01920)attP2  |
| 38358 | PRL-1       | FBgn0024734 | CG4993  | P(TRIP.HMS01826)attP2  |
| 31550 | Prm         | FBgn0003149 | CG5939  | P(TRIP.JF01112)attP2   |
| 29414 | Proc-R      | FBgn0029723 | CG6986  | P(TRIP.JF03350)attP2   |
| 29570 | Proct       | FBgn0045038 | CG7105  | P(TRIP.JF03249)attP2   |
| 58134 | proPO-A1    | FBgn0261362 | CG42639 | P(TRIP.HMJ22083)attP40 |
| 42538 | pros        | FBgn0004595 | CG17228 | P(TRIP.HMJ02107)attP40 |
| 34801 | Pros26      | FBgn0002284 | CG4097  | P(TRIP.HMS00110)attP2  |
| 34795 | Pros26.4    | FBgn0015282 | CG5289  | P(TRIP.HMS00104)attP2  |
| 36063 | Pros28.1    | FBgn0004066 | CG3422  | P(TRIP.GL00341)attP2   |
| 58218 | Pros28.1B   | FBgn0017556 | CG4569  | P(TRIP.HMJ22226)attP40 |
| 55217 | Pros29      | FBgn0261394 | CG9327  | P(TRIP.GL01834)attP2   |
| 34811 | Pros35      | FBgn0250843 | CG4904  | P(TRIP.HMS00120)attP2  |
| 34712 | Pros45      | FBgn0020369 | CG1489  | P(TRIP.HMS01191)attP2  |
| 34566 | Pros54      | FBgn0015283 | CG7619  | P(TRIP.HMS01039)attP2  |
| 27557 | Prosalpha1  | FBgn0263121 | CG18495 | P(TRIP.JF02711)attP2   |
| 44560 | Prosalpha2  | FBgn0086134 | CG5266  | P(TRIP.HMS02856)attP40 |
| 36898 | Prosalpha2  | FBgn0086134 | CG5266  | P(TRIP.GL01088)attP2   |
| 34786 | Prosalpha5  | FBgn0016697 | CG10938 | P(TRIP.HMS00095)attP2  |
| 55243 | Prosalpha6T | FBgn0032492 | CG5648  | P(TRIP.HMC02418)attP2  |
| 33660 | Prosalpha7  | FBgn0023175 | CG1519  | P(TRIP.HMS00068)attP2  |
| 40929 | Prosap      | FBgn0040752 | CG30483 | P(TRIP.HMS02177)attP2  |
| 34824 | Prosbeta1   | FBgn0010590 | CG8392  | P(TRIP.HMS00139)attP2  |
| 34868 | Prosbeta3   | FBgn0026380 | CG11981 | P(TRIP.HMS00187)attP2  |
| 34810 | Prosbeta5   | FBgn0029134 | CG12323 | P(TRIP.HMS00119)attP2  |
| 34812 | Prosbeta7   | FBgn0250746 | CG12000 | P(TRIP.HMS00122)attP2  |
| 55915 | Prp18       | FBgn0027784 | CG6011  | P(TRIP.HMC04201)attP40 |
| 32865 | Prp19       | FBgn0261119 | CG5519  | P(TRIP.HMS00652)attP2  |
| 55364 | Prp31       | FBgn0036487 | CG6876  | P(TRIP.HMC04052)attP40 |
| 34622 | Prp8        | FBgn0033688 | CG8877  | P(TRIP.HMS01297)attP2  |
| 56965 | prtp        | FBgn0030329 | CG1837  | P(TRIP.HMC04406)attP40 |
| 32497 | Prx2540-1   | FBgn0033520 | CG12405 | P(TRIP.HMS00500)attP2  |
| 37474 | Prx2540-2   | FBgn0033518 | CG11765 | P(TRIP.GL00617)attP40  |
| 51151 | Prx5        | FBgn0038570 | CG7217  | P(TRIP.GLC01376)attP2  |
| 33426 | ps          | FBgn0261552 | CG42670 | P(TRIP.HMS00310)attP2  |
| 34674 | Psa         | FBgn0261243 | CG1009  | P(TRIP.HMS01152)attP2  |
| 38261 | Psc         | FBgn0005624 | CG3886  | P(TRIP.HMS01706)attP40 |
| 33433 | PsGEF       | FBgn0040387 | CG43947 | P(TRIP.HMS00320)attP2  |
| 52877 | psh         | FBgn0030926 | CG6367  | P(TRIP.HMC03615)attP40 |
| 34825 | Psi         | FBgn0014870 | CG8912  | P(TRIP.HMS00140)attP2  |
| 38374 | Psn         | FBgn0019947 | CG18803 | P(TRIP.HMS01843)attP40 |
| 28693 | psq         | FBgn0004399 | CG2368  | P(TRIP.JF03109)attP2   |
| 33700 | PSR         | FBgn0038948 | CG5383  | P(TRIP.HMS00576)attP2  |

|       |           |             |         |                         |
|-------|-----------|-------------|---------|-------------------------|
| 28795 | ptc       | FBgn0003892 | CG2411  | P(TRIP.JF03223)attP2    |
| 33643 | Plen      | FBgn0026379 | CG5671  | P(TRIP.HMS00044)attP2   |
| 31741 | pli p     | FBgn0052133 | CG32133 | P(TRIP.HM04051)attP2    |
| 35269 | pli p     | FBgn0052133 | CG32133 | P(TRIP.GL00167)attP2    |
| 32359 | PTP-ER    | FBgn0016641 | CG9856  | P(TRIP.HMS00350)attP2   |
| 39001 | Ptp10D    | FBgn0004370 | CG1817  | P(TRIP.HMS01917)attP2   |
| 38369 | Ptp4E     | FBgn0004368 | CG6899  | P(TRIP.HMS01838)attP2   |
| 32426 | Ptp61F    | FBgn0003138 | CG9181  | P(TRIP.HMS00421)attP2   |
| 38370 | Ptp69D    | FBgn0014007 | CG10975 | P(TRIP.HMS01839)attP2   |
| 39006 | Ptp99A    | FBgn0004369 | CG11516 | P(TRIP.HMS01923)attP2   |
| 39007 | Ptpmeg    | FBgn0261985 | CG1228  | P(TRIP.HMS01924)attP2   |
| 28973 | Ptr       | FBgn0262867 | CG11212 | P(TRIP.HMS01584)attP2   |
| 31380 | Ptth      | FBgn0013323 | CG13687 | P(TRIP.JF01349)attP2    |
| 38076 | Ptth      | FBgn0013323 | CG13687 | VDRC.38076              |
| 58124 | Pbx1      | FBgn0020912 | CG1447  | P(TRIP.HM.J2073)attP40  |
| 41998 | Pu        | FBgn0003162 | CG9441  | P(TRIP.HMS02399)attP40  |
| 34392 | puc       | FBgn0243512 | CG7850  | P(TRIP.HMS01386)attP2   |
|       | puc       | FBgn0243512 | CG7850  | P(A92)puc[E69]          |
| 34785 | pUf68     | FBgn0028577 | CG12085 | P(TRIP.HMS00094)attP2   |
| 42950 | pug       | FBgn0020385 | CG4067  | P(TRIP.HMS02643)attP40  |
| 38241 | pum       | FBgn0003165 | CG9755  | P(TRIP.HMS01685)attP40  |
| 36849 | Pur-alpha | FBgn0022361 | CG1507  | P(TRIP.GL01107)attP2    |
| 39025 | put       | FBgn0003169 | CG7904  | P(TRIP.HMS01944)attP40  |
| 39038 | Pvf1      | FBgn0030964 | CG7103  | P(TRIP.HMS01958)attP40  |
| 38962 | Pvf3      | FBgn0085407 | CG34378 | P(TRIP.HMS01876)attP40  |
| 37520 | Pvr       | FBgn0032006 | CG8222  | P(TRIP.HMS01662)attP40  |
| 57507 | Pxd       | FBgn0004577 | CG3477  | P(TRIP.HMS04822)attP40  |
| 28934 | Pxt       | FBgn0261987 | CG7660  | P(TRIP.HM05145)attP2    |
| 32435 | Pxt       | FBgn0261987 | CG7660  | P(TRIP.HMS00432)attP2   |
| 33386 | pyd       | FBgn0262614 | CG43140 | P(TRIP.HMS02623)attP2   |
| 34557 | pyd3      | FBgn0037513 | CG3027  | P(TRIP.HMS01029)attP2   |
| 38208 | pygo      | FBgn0043900 | CG11518 | P(TRIP.GL00647)attP40   |
| 35218 | PyK       | FBgn0003178 | CG7070  | P(TRIP.GL00099)attP2    |
| 31297 | pyx       | FBgn0035113 | CG17142 | P(TRIP.JF01242)attP2    |
| 35448 | pzg       | FBgn0259785 | CG7752  | P(TRIP.GL00373)attP2    |
| 57159 | QC        | FBgn0052412 | CG32412 | P(TRIP.HMS04540)attP40  |
| 41662 | qin       | FBgn0263974 | CG43726 | P(TRIP.GL01398)attP2    |
| 34896 | qkr54B    | FBgn0022987 | CG4816  | P(TRIP.HMS01241)attP2   |
| 51934 | qkr58E-1  | FBgn0022986 | CG3613  | P(TRIP.HMS03215)attP40  |
| 55279 | qkr58E-2  | FBgn0022985 | CG5821  | P(TRIP.HMS03966)attP40  |
| 55922 | qkr58E-3  | FBgn0022984 | CG3584  | P(TRIP.HMS04209)attP40  |
| 28667 | qtc       | FBgn0028572 | CG14039 | P(TRIP.JF03082)attP2    |
| 41856 | qua       | FBgn0003187 | CG6433  | P(TRIP.GL01284)attP2    |
| 58061 | qvr       | FBgn0260499 | CG33472 | P(TRIP.HM.J21916)attP40 |
| 35047 | R         | FBgn0004636 | CG1956  | P(TRIP.HMS01461)attP2   |
| 42828 | r         | FBgn0003189 | CG18572 | P(TRIP.HMS02510)attP2   |
| 33375 | r         | FBgn0003189 | CG18572 | VDRC.33375              |
| 33387 | r-cup     | FBgn0031142 | CG10998 | P(TRIP.HMS00264)attP2   |
| 55183 | r-l       | FBgn0003257 | CG3593  | P(TRIP.HMS03871)attP40  |
| 34784 | r2d2      | FBgn0031951 | CG7138  | P(TRIP.HMS00093)attP2   |
| 34670 | Rab1      | FBgn0016700 | CG3320  | P(TRIP.HMS01148)attP2   |
| 27299 | Rab1      | FBgn0016700 | CG3320  | P(TRIP.JF02609)attP2    |
| 24104 | Rab1      | FBgn0016700 | CG3320  | P(UAST-YFP.Rab1)Mes2[01 |
| 26289 | Rab10     | FBgn0015789 | CG17060 | P(TRIP.JF02058)attP2    |
| 27730 | Rab11     | FBgn0015790 | CG5771  | P(TRIP.JF02812)attP2    |
| 34654 | Rab14     | FBgn0015791 | CG4212  | P(TRIP.HMS01130)attP2   |
| 34734 | Rab18     | FBgn0015794 | CG3129  | P(TRIP.HMS01214)attP2   |
| 34607 | Rab19     | FBgn0015793 | CG7062  | P(TRIP.HMS00592)attP2   |
| 34922 | Rab2      | FBgn0014009 | CG3269  | P(TRIP.HMS01271)attP2   |
| 29403 | Rab21     | FBgn0039966 | CG17515 | P(TRIP.JF03338)attP2    |
| 28025 | Rab23     | FBgn0037364 | CG2108  | P(TRIP.JF02859)attP2    |
| 31177 | Rab26     | FBgn0086913 | CG34410 | P(TRIP.JF01684)attP2    |
| 35774 | Rab27     | FBgn0025382 | CG14791 | P(TRIP.HMS01523)attP2   |
| 34655 | Rab3      | FBgn0005586 | CG7576  | P(TRIP.HMS01131)attP2   |
| 31128 | rab3-GAP  | FBgn0027505 | CG7061  | P(TRIP.JF01601)attP2    |
| 28954 | rab3-GEF  | FBgn0030613 | CG5627  | P(TRIP.HMS05165)attP2   |
| 31120 | Rab30     | FBgn0031882 | CG9100  | P(TRIP.JF01593)attP2    |
| 28342 | Rab35     | FBgn0031090 | CG9575  | P(TRIP.JF02978)attP2    |

|       |           |             |         |                        |
|-------|-----------|-------------|---------|------------------------|
| 25953 | Rab39     | FBgn0029959 | CG12156 | P{TRiP.JF01973}attP2   |
| 33757 | Rab4      | FBgn0016701 | CG4921  | P{TRiP.HMS01100}attP2  |
| 29579 | Rab40     | FBgn0030391 | CG1900  | P{TRiP.JF03258}attP2   |
| 34832 | Rab5      | FBgn0014010 | CG3664  | P{TRiP.HMS00147}attP2  |
| 35744 | Rab6      | FBgn0015797 | CG6601  | P{TRiP.HMS01486}attP2  |
| 27051 | Rab7      | FBgn0015795 | CG5915  | P{TRiP.JF02377}attP2   |
| 34373 | Rab8      | FBgn0262518 | CG8287  | P{TRiP.HMS01363}attP2  |
| 31688 | Rab9      | FBgn0032782 | CG9994  | P{TRiP.JF01861}attP2   |
| 42942 | Rab9      | FBgn0032782 | CG9994  | P{TRiP.HMS02635}attP40 |
| 38269 | Rab9Db    | FBgn0030221 | CG9807  | P{TRiP.HMS01714}attP40 |
| 34374 | Rab9Fb    | FBgn0052670 | CG32670 | P{TRiP.HMS01364}attP2  |
| 29357 | Rabex-5   | FBgn0262937 | CG9139  | P{TRiP.JF02521}attP2   |
| 32360 | RabX2     | FBgn0030200 | CG2885  | P{TRiP.HMS00351}attP2  |
| 28704 | RabX4     | FBgn0051118 | CG31118 | P{TRiP.JF03121}attP2   |
| 28045 | RabX5     | FBgn0035255 | CG7980  | P{TRiP.JF02880}attP2   |
| 26281 | RabX6     | FBgn0035155 | CG12015 | P{TRiP.JF02050}attP2   |
| 34910 | Rac1      | FBgn0010333 | CG2248  | P{TRiP.HMS01258}attP2  |
| 28985 | Rac1      | FBgn0010333 | CG2248  | P{TRiP.JF02813}attP2   |
| 6293  | Rac1      | FBgn0010333 | CG2248  | P{UAS-Rac1.L}3         |
| 34694 | Rack1     | FBgn0020618 | CG7111  | P{TRiP.HMS01173}attP2  |
| 36758 | rad       | FBgn0261379 | CG44424 | P{TRiP.HMS03018}attP2  |
| 44031 | Rad23     | FBgn0026777 | CG1836  | P{TRiP.HMS02747}attP40 |
| 32882 | Rae1      | FBgn0034646 | CG9862  | P{TRiP.HMS00670}attP2  |
| 57832 | Rae1      | FBgn0034646 | CG9862  | P{TRiP.HMJ21842}attP40 |
| 34590 | RagA      | FBgn0037647 | CG11968 | P{TRiP.HMS01064}attP2  |
| 32342 | RagC-D    | FBgn0033272 | CG8707  | P{TRiP.HMS00333}attP2  |
| 50921 | RagC-D    | FBgn0033272 | CG8707  | P{TRiP.HMJ21015}attP40 |
| 34375 | Rala      | FBgn0015286 | CG2849  | P{TRiP.HMS01365}attP2  |
| 31392 | ran       | FBgn0020255 | CG1404  | P{TRiP.JF01381}attP2   |
| 42482 | ran       | FBgn0020255 | CG1404  | P{TRiP.GL01341}attP40  |
| 27512 | ran-like  | FBgn0036497 | CG7815  | P{TRiP.JF02662}attP2   |
| 55142 | Ranbp11   | FBgn0053139 | CG33139 | P{TRiP.HMC03738}attP40 |
| 40948 | RanBP3    | FBgn0039110 | CG10225 | P{TRiP.HMS02196}attP40 |
| 33005 | Ranbp9    | FBgn0037894 | CG5252  | P{TRiP.HMS00805}attP2  |
| 29565 | RanGap    | FBgn0003346 | CG9999  | P{TRiP.JF03244}attP2   |
| 43156 | ranshi    | FBgn0037620 | CG9793  | P{TRiP.GL01497}attP2   |
| 29568 | Rap2l     | FBgn0025806 | CG3204  | P{TRiP.JF03247}attP2   |
| 31250 | Rapgap1   | FBgn0085403 | CG44086 | P{TRiP.JF01766}attP2   |
| 42782 | Rapgap1   | FBgn0264895 | CG44086 | P{TRiP.GL01152}attP2   |
| 35048 | raps      | FBgn0040080 | CG5692  | P{TRiP.HMS01462}attP2  |
| 41912 | raptor    | FBgn0029840 | CG4320  | P{TRiP.HMS02306}attP40 |
| 31654 | ras       | FBgn0003204 | CG1799  | P{TRiP.JF01446}attP2   |
| 29318 | Ras64B    | FBgn0003206 | CG1167  | P{TRiP.JF02477}attP2   |
| 34619 | Ras85D    | FBgn0003205 | CG9375  | P{TRiP.HMS01294}attP2  |
| 28921 | rasp      | FBgn0024194 | CG11495 | P{TRiP.HM05132}attP2   |
| 42534 | Rassf     | FBgn0039055 | CG4656  | P{TRiP.HMJ02102}attP40 |
| 27663 | Rassf     | FBgn0039055 | CG4656  | P{TRiP.JF02742}attP2   |
| 28323 | RASSF8    | FBgn0261986 | CG5053  | P{TRiP.JF02955}attP2   |
| 57176 | Rat1      | FBgn0031868 | CG10354 | P{TRiP.HMC04558}attP40 |
| 31345 | Ravus     | FBgn0038128 | CG15889 | P{TRiP.JF01303}attP2   |
| 31393 | raw       | FBgn0003209 | CG12437 | P{TRiP.JF01382}attP2   |
| 32477 | rb        | FBgn0003210 | CG11427 | P{TRiP.HMS00479}attP2  |
| 31333 | Rb97D     | FBgn0004903 | CG6354  | P{TRiP.JF01290}attP2   |
| 55662 | Rb97D     | FBgn0004903 | CG6354  | P{TRiP.HMC03817}attP40 |
| 42819 | Rbbp5     | FBgn0036973 | CG5585  | P{TRiP.HMJ02113}attP40 |
| 34612 | Rbcn-3A   | FBgn0023458 | CG3585  | P{TRiP.HMS01287}attP2  |
| 36744 | Rbf       | FBgn0015799 | CG7413  | P{TRiP.HMS03004}attP2  |
| 36697 | Rbf2      | FBgn0038390 | CG5083  | P{TRiP.HMS01586}attP2  |
| 55688 | Rbp1      | FBgn0260944 | CG17136 | P{TRiP.HMC03902}attP40 |
| 44100 | Rbp1-like | FBgn0030479 | CG1987  | P{TRiP.HMS02820}attP40 |
| 50905 | Rbp4      | FBgn0010258 | CG9654  | P{TRiP.HMJ03126}attP40 |
| 28669 | Rbp9      | FBgn0010263 | CG3151  | P{TRiP.JF03084}attP2   |
| 57459 | Rbsn-5    | FBgn0261064 | CG8506  | P{TRiP.HMC04769}attP40 |
| 51450 | Rca1      | FBgn0017551 | CG10800 | P{TRiP.HMC03180}attP2  |
| 36683 | Rcd-1r    | FBgn0032089 | CG9573  | P{TRiP.HMS01571}attP2  |
| 35026 | Rcd5      | FBgn0035489 | CG1135  | P{TRiP.HMS01439}attP2  |
| 15613 | Rcd5      | FBgn0035489 | CG1135  | VDRC.15613             |
| 57146 | Rcp       | FBgn0030801 | CG4875  | P{TRiP.GL01139}attP2   |

|       |            |             |         |                        |
|-------|------------|-------------|---------|------------------------|
| 29435 | rdgA       | FBgn0261549 | CG42667 | P{TRiP.JF03371}attP2   |
| 28796 | rdgB       | FBgn0003218 | CG11111 | P{TRiP.JF03224}attP2   |
| 44523 | rdgBbeta   | FBgn0027872 | CG17818 | P{TRiP.HMC02916}attP2  |
| 31662 | Rdl        | FBgn0004244 | CG10537 | P{TRiP.JF01455}attP2   |
| 31286 | Rdl        | FBgn0004244 | CG10537 | P{TRiP.JF01227}attP2   |
| 44057 | rec        | FBgn0003227 | CG31293 | P{TRiP.HMS02774}attP40 |
| 32466 | RecQ5      | FBgn0027375 | CG4879  | P{TRiP.HMS00466}attP2  |
| 36111 | ref(2)P    | FBgn0003231 | CG10360 | P{TRiP.HMS00551}attP2  |
| 34626 | Ref1       | FBgn0010774 | CG1101  | P{TRiP.HMS01301}attP2  |
| 55248 | REG        | FBgn0029133 | CG1591  | P{TRiP.HMC03935}attP40 |
| 57766 | Reg-2      | FBgn0016715 | CG3200  | P{TRiP.HMC04960}attP40 |
| 36708 | regucalcin | FBgn0030362 | CG1803  | P{TRiP.HMS01598}attP2  |
| 33661 | Rel        | FBgn0014018 | CG11992 | P{TRiP.HMS00070}attP2  |
| 28047 | Rep        | FBgn0026378 | CG8432  | P{TRiP.JF02882}attP2   |
| 41658 | Reph       | FBgn0021800 | CG3920  | P{TRiP.GL01240}attP2   |
| 28339 | repo       | FBgn0011701 | CG31240 | P{TRiP.JF02974}attP2   |
| 32415 | rept       | FBgn0040075 | CG9750  | P{TRiP.HMS00410}attP2  |
| 53702 | resilin    | FBgn0034157 | CG15920 | P{TRiP.HMJ21733}attP40 |
| 25948 | Ret        | FBgn0011829 | CG14396 | P{TRiP.JF01968}attP2   |
| 57389 | retinin    | FBgn0040074 | CG13057 | P{TRiP.HMC04693}attP40 |
| 26309 | retn       | FBgn0004795 | CG5403  | P{TRiP.JF02082}attP2   |
| 36654 | Rev1       | FBgn0035150 | CG12189 | P{TRiP.GL00614}attP2   |
| 33388 | Rfabg      | FBgn0087002 | CG11064 | P{TRiP.HMS00265}attP2  |
| 29355 | Rfx        | FBgn0020379 | CG6312  | P{TRiP.JF02518}attP2   |
| 57703 | rg         | FBgn0266098 | CG44835 | P{TRiP.HMC04892}attP40 |
| 35460 | Rga        | FBgn0017550 | CG2161  | P{TRiP.GL00386}attP2   |
| 50923 | Rgk1       | FBgn0264753 | CG44011 | P{TRiP.HMJ21017}attP40 |
| 33389 | Rgl        | FBgn0026376 | CG8865  | P{TRiP.HMS00266}attP2  |
| 42619 | rgn        | FBgn0261258 | CG6014  | P{TRiP.HMS02454}attP2  |
| 31926 | rgr        | FBgn0033310 | CG8643  | P{TRiP.JF02216}attP2   |
| 31267 | Rh3        | FBgn0003249 | CG10888 | P{TRiP.JF01208}attP2   |
| 36885 | Rh3        | FBgn0003249 | CG10888 | P{TRiP.GL01052}attP2   |
| 50666 | Rh50       | FBgn0028699 | CG7499  | P{TRiP.HMC03067}attP2  |
| 56029 | Rh6        | FBgn0019940 | CG5192  | P{TRiP.HMC04325}attP40 |
| 33913 | rhea       | FBgn0260442 | CG6831  | P{TRiP.HMS00856}attP2  |
| 33966 | Rheb       | FBgn0041191 | CG1081  | P{TRiP.HMS00923}attP2  |
| 34071 | rhi        | FBgn0004400 | CG10683 | P{TRiP.HMS00069}attP2  |
| 41699 | rho        | FBgn0004635 | CG1004  | P{TRiP.HMS02264}attP40 |
| 35617 | rho-7      | FBgn0033672 | CG8972  | P{TRiP.GL00461}attP2   |
| 32383 | Rho1       | FBgn0014020 | CG8416  | P{TRiP.HMS00375}attP2  |
| 32416 | RhoBTB     | FBgn0036980 | CG5701  | P{TRiP.HMS00411}attP2  |
| 32946 | RhoGAP100F | FBgn0039883 | CG1976  | P{TRiP.HMS00740}attP2  |
| 33425 | RhoGAP102A | FBgn0259216 | CG42316 | P{TRiP.HMS00309}attP2  |
| 42527 | RhoGAP15B  | FBgn0030808 | CG4937  | P{TRiP.HMJ02093}attP40 |
| 42541 | RhoGAP16F  | FBgn0030893 | CG7122  | P{TRiP.HMJ02111}attP40 |
| 31165 | RhoGAP18B  | FBgn0261461 | CG42274 | P{TRiP.JF01658}attP2   |
| 32361 | RhoGAP19D  | FBgn0031118 | CG1412  | P{TRiP.HMS00352}attP2  |
| 33390 | RhoGAP1A   | FBgn0025836 | CG40494 | P{TRiP.HMS00267}attP2  |
| 31144 | RhoGAP54D  | FBgn0034249 | CG6477  | P{TRiP.JF01619}attP2   |
| 54051 | RhoGAP54D  | FBgn0034249 | CG6477  | P{TRiP.HMS03522}attP40 |
| 31163 | RhoGAP5A   | FBgn0029778 | CG3208  | P{TRiP.JF01656}attP2   |
| 41990 | RhoGAP68F  | FBgn0036257 | CG6811  | P{TRiP.HMS02390}attP40 |
| 32417 | RhoGAP71E  | FBgn0036518 | CG32149 | P{TRiP.HMS00412}attP2  |
| 33391 | RhoGAP92B  | FBgn0038747 | CG4755  | P{TRiP.HMS00268}attP2  |
| 35027 | RhoGAP93B  | FBgn0038853 | CG3421  | P{TRiP.HMS01440}attP2  |
| 31070 | RhoGAPp190 | FBgn0026375 | CG32555 | P{TRiP.JF01520}attP2   |
| 40902 | RhoGDI     | FBgn0036921 | CG7823  | P{TRiP.HMS02150}attP40 |
| 34643 | RhoGEF2    | FBgn0023172 | CG9635  | P{TRiP.HMS01118}attP2  |
| 31581 | RhoGEF3    | FBgn0259743 | CG43976 | P{TRiP.JF01154}attP2   |
| 42526 | RhoGEF3    | FBgn0264707 | CG43976 | P{TRiP.HMJ02092}attP40 |
| 31580 | RhoGEF3    | FBgn0264707 | CG43976 | P{TRiP.JF01153}attP2   |
| 42550 | RhoGEF4    | FBgn0035761 | CG8606  | P{TRiP.HMJ02122}attP40 |
| 33723 | RhoL       | FBgn0014380 | CG9366  | P{TRiP.HMS00605}attP2  |
| 54474 | Rhp        | FBgn0026374 | CG8497  | P{TRiP.HMS03725}attP2  |
| 50682 | rib        | FBgn0003254 | CG7230  | P{TRiP.HMC03083}attP2  |
| 27520 | Ric        | FBgn0017549 | CG8418  | P{TRiP.JF02670}attP2   |
| 28910 | ric8a      | FBgn0028292 | CG15797 | P{TRiP.HM05121}attP2   |
| 36699 | riCTOR     | FBgn0031006 | CG8002  | P{TRiP.HMS01588}attP2  |

|       |            |             |         |                        |
|-------|------------|-------------|---------|------------------------|
| 51051 | Rif1       | FBgn0050085 | CG30085 | P{TRIP.HMJ21185}attP40 |
| 34684 | rig        | FBgn0250850 | CG30149 | P{TRIP.HMS01162}attP2  |
| 27300 | Rim        | FBgn0053547 | CG33547 | P{TRIP.JF02610}attP2   |
| 33392 | rin        | FBgn0015778 | CG9412  | P{TRIP.HMS00269}attP2  |
| 38325 | Rip11      | FBgn0027335 | CG6606  | P{TRIP.HMS01792}attP2  |
| 43259 | Ripalpha   | FBgn0032189 | CG18145 | P{TRIP.GLC01448}attP2  |
| 31958 | rk         | FBgn0003255 | CG8930  | P{TRIP.JF02678}attP2   |
| 34855 | rl         | FBgn0003256 | CG12559 | P{TRIP.HMS00173}attP2  |
| 50589 | Rlb1       | FBgn0014022 | CG8161  | P{TRIP.GLC01711}attP2  |
| 50983 | RluA-2     | FBgn0032256 | CG6187  | P{TRIP.HMJ21091}attP40 |
| 34829 | Rm62       | FBgn0003261 | CG10279 | P{TRIP.HMS00144}attP2  |
| 58150 | Rm62       | FBgn0003261 | CG10279 | P{TRIP.HMJ22101}attP40 |
| 28670 | RN-tre     | FBgn0020620 | CG8085  | P{TRIP.JF03085}attP2   |
| 38322 | RNaseX25   | FBgn0010406 | CG8194  | P{TRIP.HMS01786}attP2  |
| 13018 | RNaseX25   | FBgn0010406 | CG8194  | VDRC.13018             |
| 57774 | rno        | FBgn0035106 | CG7036  | P{TRIP.HMC04968}attP40 |
| 35457 | Rnp4F      | FBgn0014024 | CG3312  | P{TRIP.GL00383}attP2   |
| 36580 | RnpS1      | FBgn0037707 | CG16788 | P{TRIP.GL00540}attP2   |
| 56910 | RnpS1      | FBgn0037707 | CG16788 | P{TRIP.HMS04329}attP40 |
| 44022 | RnrL       | FBgn0011703 | CG5371  | P{TRIP.HMS02737}attP40 |
| 32864 | RnrS       | FBgn0011704 | CG8975  | P{TRIP.HMS00651}attP2  |
| 28671 | ro         | FBgn0003267 | CG6348  | P{TRIP.JF03086}attP2   |
| 31977 | robl       | FBgn0024196 | CG10751 | P{TRIP.JF03411}attP2   |
| 22760 | robl       | FBgn0024196 | CG10751 | VDRC.22760             |
| 54813 | robl62A    | FBgn0028567 | CG1014  | P{TRIP.HMJ21532}attP40 |
| 39027 | robo       | FBgn0005631 | CG13521 | P{TRIP.HMS01946}attP40 |
| 29398 | robo3      | FBgn0041097 | CG5423  | P{TRIP.JF03331}attP2   |
| 32362 | Roc1a      | FBgn0025638 | CG16982 | P{TRIP.HMS00353}attP2  |
| 31067 | Roc1b      | FBgn0040291 | CG16988 | P{TRIP.JF01517}attP2   |
| 44060 | Roe1       | FBgn0014877 | CG6155  | P{TRIP.HMS02777}attP40 |
| 34324 | rok        | FBgn0026181 | CG9774  | P{TRIP.HMS01311}attP2  |
| 58262 | rols       | FBgn0041096 | CG32096 | P{TRIP.HMJ22326}attP40 |
| 57283 | Rootletin  | FBgn0039152 | CG6129  | P{TRIP.HMC04680}attP40 |
| 28929 | Rop        | FBgn0004574 | CG15811 | P{TRIP.HMS05140}attP2  |
| 25971 | row        | FBgn0033998 | CG8092  | P{TRIP.JF01993}attP2   |
| 28196 | row        | FBgn0033998 | CG8092  | VDRC.28196             |
| 27734 | rox1       | FBgn0019661 | CR32777 | P{TRIP.JF02818}attP2   |
| 28986 | rox2       | FBgn0019660 | CR32665 | P{TRIP.JF02817}attP2   |
| 32472 | Rox8       | FBgn0005649 | CG5422  | P{TRIP.HMS00472}attP2  |
| 28035 | Rox8       | FBgn0005649 | CG5422  | P{TRIP.JF02870}attP2   |
| 35426 | RpA-70     | FBgn0010173 | CG9633  | P{TRIP.GL00350}attP2   |
| 34587 | RPA2       | FBgn0032906 | CG9273  | P{TRIP.HMS01061}attP2  |
| 57447 | Rpb10      | FBgn0039218 | CG13628 | P{TRIP.HMC04755}attP40 |
| 41861 | Rpb5       | FBgn0033571 | CG11979 | P{TRIP.GL01291}attP2   |
| 57028 | Rpb7       | FBgn0051155 | CG31155 | P{TRIP.HMS04473}attP40 |
| 33725 | Rpd3       | FBgn0015805 | CG7471  | P{TRIP.HMS00607}attP2  |
| 25950 | Rph        | FBgn0030230 | CG11556 | P{TRIP.JF01970}attP2   |
| 41715 | Rpl12      | FBgn0038903 | CG13418 | P{TRIP.HMS02280}attP2  |
| 43282 | Rpl140     | FBgn0262955 | CG3180  | P{TRIP.HMC02681}attP2  |
| 36830 | Rpl1215    | FBgn0003277 | CG1554  | P{TRIP.GL01068}attP2   |
| 34567 | Rpl133     | FBgn0026373 | CG7885  | P{TRIP.HMS01040}attP2  |
| 39053 | rpk        | FBgn0022981 | CG1058  | P{TRIP.HMS01973}attP40 |
| 29356 | RpL10      | FBgn0024733 | CG17521 | P{TRIP.JF02520}attP2   |
| 34695 | RpL10Ab    | FBgn0036213 | CG7283  | P{TRIP.HMS01174}attP2  |
| 54048 | RpL17      | FBgn0029897 | CG3203  | P{TRIP.HMS03519}attP40 |
| 51812 | RpL18      | FBgn0035753 | CG8615  | P{TRIP.HMC03383}attP2  |
| 34828 | RpL22      | FBgn0015288 | CG7434  | P{TRIP.HMS00143}attP2  |
| 42773 | RpL22-like | FBgn0034837 | CG9871  | P{TRIP.GL00729}attP2   |
| 51818 | RpL23A     | FBgn0026372 | CG7977  | P{TRIP.HMC03389}attP2  |
| 34569 | RpL24      | FBgn0032518 | CG9282  | P{TRIP.HMS01043}attP2  |
| 36076 | RpL28      | FBgn0035422 | CG12740 | P{TRIP.GL00495}attP2   |
| 36596 | RpL3       | FBgn0020910 | CG4863  | P{TRIP.GL00556}attP2   |
| 44647 | RpL31      | FBgn0025286 | CG1821  | P{TRIP.HMC02354}attP2  |
| 51746 | RpL32      | FBgn0002626 | CG7939  | P{TRIP.HMC02350}attP2  |
| 53302 | RpL36      | FBgn0002579 | CG7622  | P{TRIP.HMC03529}attP2  |
| 43252 | RpL36A     | FBgn0031980 | CG7424  | P{TRIP.GLC01441}attP2  |
| 35417 | RpL40      | FBgn0003941 | CG2960  | P{TRIP.GL00339}attP2   |
| 34004 | RpL6       | FBgn0039857 | CG11522 | P{TRIP.HMS00967}attP2  |

|       |            |             |         |                        |
|-------|------------|-------------|---------|------------------------|
| 34600 | RpL7       | FBgn0005593 | CG4897  | P{TRiP.HMS01074}attP2  |
| 50610 | RpL8       | FBgn0261602 | CG1263  | P{TRiP.HMC02977}attP2  |
| 31370 | RpLP0      | FBgn0000100 | CG7490  | P{TRiP.JF01335}attP2   |
| 33730 | RpLP0-like | FBgn0033485 | CG1381  | P{TRiP.HMS00613}attP2  |
| 31066 | RpLP2      | FBgn0003274 | CG4918  | P{TRiP.JF01516}attP2   |
| 34348 | Rpn1       | FBgn0028695 | CG7762  | P{TRiP.HMS01337}attP2  |
| 33662 | Rpn11      | FBgn0028694 | CG18174 | P{TRiP.HMS00071}attP2  |
| 34560 | Rpn12      | FBgn0028693 | CG4157  | P{TRiP.HMS01032}attP2  |
| 51044 | Rpn12R     | FBgn0036465 | CG11552 | P{TRiP.HMJ21176}attP40 |
| 34961 | Rpn2       | FBgn0028692 | CG11888 | P{TRiP.HMS00533}attP2  |
| 34561 | Rpn3       | FBgn0261396 | CG42641 | P{TRiP.HMS01033}attP2  |
| 34532 | Rpn5       | FBgn0028690 | CG1100  | P{TRiP.HMS00971}attP2  |
| 29385 | Rpn6       | FBgn0028689 | CG10149 | P{TRiP.JF03317}attP2   |
| 34787 | Rpn7       | FBgn0028688 | CG5378  | P{TRiP.HMS00096}attP2  |
| 34034 | Rpn9       | FBgn0028691 | CG10230 | P{TRiP.HMS01007}attP2  |
| 51846 | rpr        | FBgn0011706 | CG4319  | P{TRiP.HMC03419}attP40 |
| 42772 | RpS10a     | FBgn0027494 | CG12275 | P{TRiP.GL00728}attP2   |
| 43976 | RpS10b     | FBgn0261593 | CG14206 | P{TRiP.GL01586}attP2   |
| 34820 | RpS13      | FBgn0010265 | CG13389 | P{TRiP.HMS00135}attP2  |
| 51676 | RpS15      | FBgn0034138 | CG8332  | P{TRiP.GL01405}attP2   |
| 34005 | RpS15Aa    | FBgn0010198 | CG2033  | P{TRiP.HMS00968}attP2  |
| 34008 | RpS15Ab    | FBgn0033555 | CG12324 | P{TRiP.HMS00973}attP2  |
| 42656 | RpS17      | FBgn0005533 | CG3922  | P{TRiP.HMS02492}attP2  |
| 42774 | RpS19a     | FBgn0010412 | CG4464  | P{TRiP.GL00730}attP2   |
| 41651 | RpS19b     | FBgn0039129 | CG5338  | P{TRiP.GL01233}attP2   |
| 53319 | RpS2       | FBgn0004867 | CG5920  | P{TRiP.HMC03548}attP2  |
| 33393 | RpS26      | FBgn0261597 | CG10305 | P{TRiP.HMS00270}attP2  |
| 36692 | RpS27      | FBgn0039300 | CG10423 | P{TRiP.HMS01581}attP2  |
| 35418 | RpS27A     | FBgn0003942 | CG5271  | P{TRiP.GL00340}attP2   |
| 32850 | RpS28b     | FBgn0030136 | CG2998  | P{TRiP.HMS00635}attP2  |
| 54822 | RpS29      | FBgn0261599 | CG8495  | P{TRiP.HMJ21541}attP40 |
| 31625 | RpS3       | FBgn0002622 | CG6779  | P{TRiP.JF01410}attP2   |
| 35410 | RpS3       | FBgn0002622 | CG6779  | P{TRiP.GL00332}attP2   |
| 32851 | RpS30      | FBgn0038834 | CG15697 | P{TRiP.HMS00636}attP2  |
| 43160 | RpS5a      | FBgn0002590 | CG8922  | P{TRiP.GL01502}attP2   |
| 32418 | RpS6       | FBgn0261592 | CG10944 | P{TRiP.HMS00413}attP2  |
| 33394 | RpS9       | FBgn0010408 | CG3395  | P{TRiP.HMS00271}attP2  |
| 33930 | Rpt1       | FBgn0028687 | CG1341  | P{TRiP.HMS00879}attP2  |
| 34917 | Rpt3       | FBgn0028686 | CG16916 | P{TRiP.HMS01265}attP2  |
| 34713 | Rpt3R      | FBgn0037742 | CG9475  | P{TRiP.HMS01192}attP2  |
| 32874 | Rpt4       | FBgn0028685 | CG3455  | P{TRiP.HMS00661}attP2  |
| 34342 | Rpt6R      | FBgn0039788 | CG2241  | P{TRiP.HMS01330}attP2  |
| 49244 | Rpt6R      | FBgn0039788 | CG2241  | VDRC.49244             |
| 35420 | Rrp1       | FBgn0004584 | CG3178  | P{TRiP.GL00343}attP2   |
| 58202 | Rrp45      | FBgn0030789 | CG9606  | P{TRiP.HMJ22172}attP40 |
| 42604 | Rrp6       | FBgn0038269 | CG7292  | P{TRiP.HMS02437}attP40 |
| 34809 | Rrp6       | FBgn0038269 | CG7292  | P{TRiP.HMS00118}attP2  |
| 32363 | Rs1        | FBgn0021995 | CG2173  | P{TRiP.HMS00354}attP2  |
| 41971 | Rsf1       | FBgn0011305 | CG5655  | P{TRiP.HMS02368}attP2  |
| 22186 | Rsf1       | FBgn0011305 | CG5655  | VDRC.22186             |
| 28574 | RSG7       | FBgn0024941 | CG9108  | P{TRiP.HM05060}attP2   |
| 28672 | rst        | FBgn0003285 | CG4125  | P{TRiP.JF03087}attP2   |
| 51805 | rt         | FBgn0003292 | CG6097  | P{TRiP.HMC03363}attP40 |
| 34850 | Rtf1       | FBgn0034722 | CG10955 | P{TRiP.HMS00168}attP2  |
| 32947 | rtGEF      | FBgn0015803 | CG10043 | P{TRiP.HMS00741}attP2  |
| 58208 | Rtnl2      | FBgn0015831 | CG1279  | P{TRiP.HMJ22178}attP40 |
| 41593 | ru         | FBgn0003295 | CG1214  | P{TRiP.GL01129}attP2   |
| 58065 | ru         | FBgn0003295 | CG1214  | P{TRiP.HMJ21921}attP40 |
| 26727 | rumi       | FBgn0086253 | CG31152 | P{TRiP.JF02269}attP2   |
| 42665 | rump       | FBgn0260010 | CG9373  | P{TRiP.HMS02501}attP40 |
| 34707 | run        | FBgn0003300 | CG1849  | P{TRiP.HMS01186}attP2  |
| 33353 | RunxA      | FBgn0083981 | CG34145 | P{TRiP.HMS00224}attP2  |
| 57456 | RunxB      | FBgn0259162 | CG42267 | P{TRiP.HMC04765}attP40 |
| 27035 | rut        | FBgn0003301 | CG9533  | P{TRiP.JF02361}attP2   |
| 32467 | rux        | FBgn0003302 | CG4336  | P{TRiP.HMS00467}attP2  |
| 28674 | Rx         | FBgn0020617 | CG10052 | P{TRiP.JF03089}attP2   |
| 44106 | ry         | FBgn0003308 | CG7642  | P{TRiP.HMS02827}attP40 |
| 28919 | Rya-r44F   | FBgn0011286 | CG10844 | P{TRiP.HM05130}attP2   |



|       |             |             |         |                        |
|-------|-------------|-------------|---------|------------------------|
| 55957 | RYamide     | FBgn0085512 | CG40733 | P(TRIP.HMC04246)attP40 |
| 33974 | RYBP        | FBgn0034763 | CG12190 | P(TRIP.HMS00931)attP2  |
| 38914 | S           | FBgn0003310 | CG4385  | P(TRIP.GL00686)attP2   |
| 27281 | s-cup       | FBgn0050044 | CG30044 | P(TRIP.JF02592)attP2   |
| 54796 | S-Lap5      | FBgn0033860 | CG18369 | P(TRIP.HMJ21193)attP40 |
| 57856 | S-Lap5      | FBgn0033860 | CG18369 | P(TRIP.HMJ21903)attP40 |
| 35760 | S2P         | FBgn0033656 | CG8988  | P(TRIP.HMS01508)attP2  |
| 42572 | S6k         | FBgn0015806 | CG10539 | P(TRIP.HMJ02231)attP40 |
| 27731 | S6kll       | FBgn0262866 | CG17596 | P(TRIP.JF02814)attP2   |
| 36730 | sa          | FBgn0002842 | CG11308 | P(TRIP.HMS01621)attP2  |
| 33395 | SA          | FBgn0020616 | CG3423  | P(TRIP.HMS00272)attP2  |
| 36794 | SA          | FBgn0020616 | CG3423  | P(TRIP.GL00534)attP40  |
| 51759 | Saf-B       | FBgn0039229 | CG6995  | P(TRIP.HMC03311)attP2  |
| 25980 | sage        | FBgn0037672 | CG12952 | P(TRIP.JF02002)attP2   |
| 35335 | SAK         | FBgn0026371 | CG7186  | P(TRIP.GL00244)attP2   |
| 33921 | sala        | FBgn0003313 | CG4922  | P(TRIP.HMS00866)attP2  |
| 33714 | salm        | FBgn0261648 | CG6464  | P(TRIP.HMS00594)attP2  |
| 29549 | salr        | FBgn0000287 | CG4881  | P(TRIP.JF03226)attP2   |
| 31548 | sals        | FBgn0051374 | CG31374 | P(TRIP.JF01110)attP2   |
| 29415 | Sam-S       | FBgn0005278 | CG2674  | P(TRIP.JF03351)attP2   |
| 36632 | san         | FBgn0024188 | CG12352 | P(TRIP.GL00592)attP2   |
| 34995 | santa-maria | FBgn0025697 | CG12789 | P(TRIP.HMS01405)attP2  |
| 29550 | santa-maria | FBgn0025697 | CG12789 | P(TRIP.JF03227)attP2   |
| 51688 | Sap30       | FBgn0030788 | CG4756  | P(TRIP.GLC01790)attP2  |
| 27527 | Sap47       | FBgn0013334 | CG8884  | P(TRIP.JF02677)attP2   |
| 32364 | sar1        | FBgn0038947 | CG7073  | P(TRIP.HMS00355)attP2  |
| 34894 | Sara        | FBgn0026369 | CG15667 | P(TRIP.HMS01239)attP2  |
| 19150 | Sara        | FBgn0026369 | CG15667 | VDRC.19150             |
| 23709 | Sara        | FBgn0026369 | CG15667 | P(UAS-Sara.MYC.His6)BC |
| 34357 | Sas         | FBgn0038045 | CG5232  | P(TRIP.HMS01346)attP2  |
| 35049 | Sas-4       | FBgn0011020 | CG10061 | P(TRIP.HMS01463)attP2  |
| 17975 | Sas-4       | FBgn0011020 | CG10061 | VDRC.17975             |
| 50572 | Sas10       | FBgn0029755 | CG4202  | P(TRIP.GLC01694)attP2  |
| 32965 | sav         | FBgn0053193 | CG33193 | P(TRIP.HMS00760)attP2  |
| 42546 | sax         | FBgn0003317 | CG1891  | P(TRIP.HMJ02118)attP40 |
| 42647 | Sb          | FBgn0003319 | CG4316  | P(TRIP.HMS02483)attP2  |
| 51488 | sba         | FBgn0016754 | CG13598 | P(TRIP.HMC03239)attP2  |
| 27049 | sbb         | FBgn0010575 | CG5580  | P(TRIP.JF02375)attP2   |
| 32419 | Sbf         | FBgn0025802 | CG6939  | P(TRIP.HMS00414)attP2  |
| 50544 | Sbp2        | FBgn0087039 | CG7066  | P(TRIP.GLC01663)attP2  |
| 42013 | sbr         | FBgn0003321 | CG1664  | P(TRIP.HMS02414)attP40 |
| 28924 | sbr         | FBgn0003321 | CG1664  | P(TRIP.HM05135)attP2   |
| 26206 | sc          | FBgn0004170 | CG3827  | P(TRIP.JF02104)attP2   |
| 51902 | Sc2         | FBgn0035471 | CG10849 | P(TRIP.HMC03476)attP40 |
| 28675 | sca         | FBgn0003326 | CG17579 | P(TRIP.JF03090)attP2   |
| 29386 | scaf        | FBgn0033033 | CG11066 | P(TRIP.JF03318)attP2   |
| 55644 | scaf6       | FBgn0261872 | CG33522 | P(TRIP.HMC03793)attP40 |
| 38277 | Scamp       | FBgn0040285 | CG9195  | P(TRIP.HMS01728)attP40 |
| 31566 | SCAP        | FBgn0033052 | CG33131 | P(TRIP.JF01139)attP2   |
| 36121 | SCAR        | FBgn0041781 | CG4636  | P(TRIP.HMS01536)attP40 |
| 38994 | scat        | FBgn0011232 | CG3766  | P(TRIP.HMS01910)attP40 |
| 38959 | scb         | FBgn0003328 | CG8095  | P(TRIP.HMS01873)attP40 |
| 31612 | Scce        | FBgn0003330 | CG5595  | P(TRIP.JF01396)attP2   |
| 35446 | Scce        | FBgn0003330 | CG5595  | P(TRIP.GL00371)attP2   |
| 36098 | sced        | FBgn0013732 | CG3273  | P(TRIP.GL00517)attP2   |
| 34331 | scf         | FBgn0025682 | CG9148  | P(TRIP.HMS01319)attP2  |
| 34027 | Scgal pha   | FBgn0032013 | CG7851  | P(TRIP.HMS00997)attP2  |
| 29551 | Scgbeta     | FBgn0038042 | CG5657  | P(TRIP.JF03228)attP2   |
| 25964 | Scgdelta    | FBgn0025391 | CG14808 | P(TRIP.JF01984)attP2   |
| 29340 | schlank     | FBgn0040918 | CG3576  | P(TRIP.JF02502)attP2   |
| 42755 | schuy       | FBgn0036925 | CG17736 | P(TRIP.GL00710)attP2   |
| 31614 | Scm         | FBgn0003334 | CG9495  | P(TRIP.JF01398)attP2   |
| 35389 | Scm         | FBgn0003334 | CG9495  | P(TRIP.GL00308)attP2   |
| 40877 | scny        | FBgn0260936 | CG5505  | P(TRIP.HMS02044)attP2  |
| 33406 | scny        | FBgn0260936 | CG5505  | P(TRIP.HMS00285)attP2  |
| 55179 | Scox        | FBgn0262467 | CG8885  | P(TRIP.HMC03860)attP40 |
| 31957 | Scp1        | FBgn0020908 | CG15848 | P(TRIP.JF02573)attP2   |
| 55976 | scpr-A      | FBgn0037889 | CG5207  | P(TRIP.HMC04272)attP40 |

|       |            |             |         |                        |
|-------|------------|-------------|---------|------------------------|
| 57156 | scpr-B     | FBgn0037888 | CG17210 | P(TRIP.HMC04536)attP40 |
| 51479 | ScpX       | FBgn0015808 | CG17320 | P(TRIP.HMC03224)attP40 |
| 28676 | Scr        | FBgn0003339 | CG1030  | P(TRIP.JF03091)attP2   |
| 41841 | scra       | FBgn0261385 | CG2092  | P(TRIP.GL01269)attP2   |
| 39073 | scrib      | FBgn0263289 | CG43398 | P(TRIP.HMS01993)attP40 |
| 33890 | scro       | FBgn0028993 | CG17594 | P(TRIP.HMS00828)attP2  |
| 29387 | scro       | FBgn0028993 | CG17594 | P(TRIP.JF03319)attP2   |
| 27025 | scrt       | FBgn0004880 | CG1130  | P(TRIP.JF02346)attP2   |
| 55309 | scrt       | FBgn0004880 | CG1130  | P(TRIP.HMC03996)attP2  |
| 51807 | Scscal pha | FBgn0004888 | CG1065  | P(TRIP.HMC03366)attP40 |
| 41884 | scu        | FBgn0021765 | CG7113  | P(TRIP.HMS02305)attP40 |
| 29352 | sd         | FBgn0003345 | CG8544  | P(TRIP.JF02514)attP2   |
| 37494 | sda        | FBgn0285963 | CG46339 | P(TRIP.HMS01636)attP2  |
| 51723 | Sdc        | FBgn0010415 | CG10497 | P(TRIP.HMC03265)attP2  |
| 53281 | SdhC       | FBgn0037873 | CG6666  | P(TRIP.HMC03497)attP40 |
| 33412 | sdk        | FBgn0021764 | CG5227  | P(TRIP.HMS00292)attP2  |
| 38988 | sdt        | FBgn0261873 | CG32717 | P(TRIP.HMS01904)attP40 |
| 34685 | sea        | FBgn0037912 | CG6782  | P(TRIP.HMS01163)attP2  |
| 27483 | sec10      | FBgn0266673 | CG6159  | P(TRIP.JF02633)attP2   |
| 32468 | sec13      | FBgn0024509 | CG6773  | P(TRIP.HMS00468)attP2  |
| 27499 | sec15      | FBgn0266674 | CG7034  | P(TRIP.JF02649)attP2   |
| 34893 | Sec22      | FBgn0260855 | CG7359  | P(TRIP.HMS01238)attP2  |
| 32365 | sec23      | FBgn0262125 | CG1250  | P(TRIP.HMS00356)attP2  |
| 32878 | sec31      | FBgn0033339 | CG8266  | P(TRIP.HMS00666)attP2  |
| 35867 | sec31      | FBgn0033339 | CG8266  | VDRC.35867             |
| 27526 | sec5       | FBgn0266670 | CG8843  | P(TRIP.JF02676)attP2   |
| 27314 | sec6       | FBgn0266671 | CG5341  | P(TRIP.JF02623)attP2   |
| 35730 | Sec61alpha | FBgn0086357 | CG9539  | P(TRIP.HMS01472)attP2  |
| 50626 | Sec61beta  | FBgn0010638 | CG10130 | P(TRIP.HMC02993)attP2  |
| 52925 | sec63      | FBgn0035771 | CG8583  | P(TRIP.HMC03666)attP40 |
| 32366 | sec71      | FBgn0028538 | CG7578  | P(TRIP.HMS00357)attP2  |
| 57441 | sec8       | FBgn0262603 | CG2095  | P(TRIP.HMC04748)attP40 |
| 31682 | sei        | FBgn0003353 | CG3182  | P(TRIP.JF01475)attP2   |
| 37501 | Seipin     | FBgn0040336 | CG9904  | P(TRIP.HMS01643)attP40 |
| 51015 | sel        | FBgn0263260 | CG12918 | P(TRIP.HMJ21136)attP40 |
| 29553 | SelD       | FBgn0261270 | CG8553  | P(TRIP.JF03230)attP2   |
| 52919 | SelR       | FBgn0037847 | CG6584  | P(TRIP.HMC03659)attP40 |
| 34320 | Sema-1a    | FBgn0011259 | CG18405 | P(TRIP.HMS01307)attP2  |
| 28588 | Sema-1b    | FBgn0016059 | CG6446  | P(TRIP.HM05076)attP2   |
| 29519 | Sema-2a    | FBgn0011260 | CG4700  | P(TRIP.HM05196)attP2   |
| 28932 | Sema-2b    | FBgn0264273 | CG33960 | P(TRIP.HM05143)attP2   |
| 29436 | Sema-5c    | FBgn0250876 | CG5661  | P(TRIP.JF03372)attP2   |
| 52892 | Sems       | FBgn0037036 | CG10586 | P(TRIP.HMC03630)attP40 |
| 53369 | Send1      | FBgn0031406 | CG17012 | P(TRIP.HMC03598)attP40 |
| 41609 | Send2      | FBgn0264253 | CG18125 | P(TRIP.GL01191)attP40  |
| 27287 | sens       | FBgn0002573 | CG32120 | P(TRIP.JF02575)attP2   |
| 34984 | sens-2     | FBgn0051632 | CG31632 | P(TRIP.HMS01394)attP2  |
| 27709 | Septin 1   | FBgn0011710 | CG1403  | P(TRIP.JF02789)attP2   |
| 28004 | Septin 2   | FBgn0014029 | CG4173  | P(TRIP.JF02838)attP2   |
| 31119 | Septin 4   | FBgn0259923 | CG9699  | P(TRIP.JF01592)attP2   |
| 41859 | Septin 4   | FBgn0259923 | CG9699  | P(TRIP.GL01287)attP2   |
| 31216 | Septin 5   | FBgn0026361 | CG2916  | P(TRIP.JF01771)attP2   |
| 51923 | seq        | FBgn0028991 | CG32904 | P(TRIP.HMC03316)attP2  |
| 34700 | Ser        | FBgn0004197 | CG6127  | P(TRIP.HMS01179)attP2  |
| 41624 | Ser12      | FBgn0011832 | CG17240 | P(TRIP.GL01206)attP40  |
| 41621 | Ser6       | FBgn0011834 | CG2071  | P(TRIP.GL01203)attP40  |
| 42649 | Ser7       | FBgn0019929 | CG2045  | P(TRIP.HMS02485)attP2  |
| 41920 | Ser8       | FBgn0019928 | CG4812  | P(TRIP.HMS02317)attP2  |
| 41640 | Ser8       | FBgn0019928 | CG4812  | P(TRIP.GL01222)attP40  |
| 36661 | sesB       | FBgn0003360 | CG16944 | P(TRIP.HMS01549)attP2  |
| 40931 | Set1       | FBgn0040022 | CG40351 | P(TRIP.HMS02179)attP40 |
| 42511 | Set2       | FBgn0030486 | CG1716  | P(TRIP.HMJ02076)attP40 |
| 36778 | sev        | FBgn0003366 | CG18085 | P(TRIP.JF02393)attP2   |
| 28036 | SF1        | FBgn0025571 | CG5836  | P(TRIP.JF02871)attP2   |
| 32367 | SF2        | FBgn0283477 | CG6987  | P(TRIP.HMS00358)attP2  |
| 29522 | SF2        | FBgn0283477 | CG6987  | P(TRIP.HM05199)attP2   |
| 36656 | sff        | FBgn0036544 | CG6114  | P(TRIP.HMS01280)attP2  |
| 34601 | sfl        | FBgn0020251 | CG8339  | P(TRIP.HMS00543)attP2  |

|       |          |             |         |                        |
|-------|----------|-------------|---------|------------------------|
| 32473 | Sfm bt   | FBgn0032475 | CG16975 | P{TRIP.HMS00473}attP2  |
| 51052 | Sfp33A3  | FBgn0259964 | CG42474 | P{TRIP.HMJ21186}attP40 |
| 39000 | Sgf29    | FBgn0050390 | CG30390 | P{TRIP.HMS01916}attP2  |
| 38293 | sgg      | FBgn0003371 | CG2621  | P{TRIP.HMS01751}attP40 |
| 51421 | Sgs1     | FBgn0003372 | CG3047  | P{TRIP.HMC02393}attP2  |
| 34605 | Sgt1     | FBgn0265101 | CG9617  | P{TRIP.HMS00566}attP2  |
| 31680 | Sh       | FBgn0003380 | CG12348 | P{TRIP.JF01473}attP2   |
| 53347 | Sh       | FBgn0003380 | CG12348 | P{TRIP.HMC03576}attP40 |
| 27653 | SH3PX1   | FBgn0040475 | CG6757  | P{TRIP.JF02730}attP2   |
| 41999 | Shab     | FBgn0262593 | CG43128 | P{TRIP.HMS02400}attP40 |
| 27292 | shakB    | FBgn0085387 | CG34358 | P{TRIP.JF02604}attP2   |
| 31879 | Shal     | FBgn0005564 | CG9262  | P{TRIP.JF02154}attP2   |
| 42555 | shar k   | FBgn0015295 | CG18247 | P{TRIP.HMJ02128}attP40 |
| 28346 | Shaw     | FBgn0003386 | CG2822  | P{TRIP.JF02982}attP2   |
| 25819 | Shawl    | FBgn0085395 | CG34366 | P{TRIP.JF01837}attP2   |
| 33996 | shep     | FBgn0052423 | CG32423 | P{TRIP.HMS00959}attP2  |
| 55867 | shf      | FBgn0003390 | CG3135  | P{TRIP.HMC04137}attP2  |
| 14803 | shf      | FBgn0003390 | CG3135  | VDRC.14803             |
| 32904 | shg      | FBgn0003391 | CG3722  | P{TRIP.HMS00693}attP2  |
| 36921 | shi      | FBgn0003392 | CG18102 | P{TRIP.HMS00154}attP2  |
| 34689 | shn      | FBgn0003396 | CG7734  | P{TRIP.HMS01167}attP2  |
| 3226  | shn      | FBgn0003396 | CG7734  | VDRC.3226              |
| 28336 | shot     | FBgn0013733 | CG18076 | P{TRIP.JF02971}attP2   |
| 38305 | shrb     | FBgn0086656 | CG8055  | P{TRIP.HMS01767}attP40 |
| 40942 | Shroom   | FBgn0085408 | CG34379 | P{TRIP.HMS02190}attP2  |
| 38531 | shtd     | FBgn0004391 | CG9198  | P{TRIP.HMS01744}attP2  |
| 35454 | shu      | FBgn0003401 | CG4735  | P{TRIP.GL00379}attP2   |
| 53315 | sick     | FBgn0263873 | CG43720 | P{TRIP.HMC03544}attP2  |
| 50642 | side     | FBgn0016061 | CG31062 | P{TRIP.HMC03042}attP2  |
| 25789 | sif      | FBgn0085447 | CG34418 | P{TRIP.JF01795}attP2   |
| 34947 | SIFR     | FBgn0038880 | CG10823 | P{TRIP.HMS00299}attP2  |
| 39005 | Sik3     | FBgn0262103 | CG42856 | P{TRIP.HMS01922}attP2  |
| 32488 | sim      | FBgn0004666 | CG7771  | P{TRIP.HMS00491}attP2  |
| 33895 | sima     | FBgn0266411 | CG45051 | P{TRIP.HMS00833}attP2  |
| 55656 | Sin      | FBgn0028402 | CG10582 | P{TRIP.HMC03807}attP40 |
| 36677 | Sin1     | FBgn0033935 | CG10105 | P{TRIP.HMS01565}attP2  |
| 32368 | Sin3A    | FBgn0022764 | CG8815  | P{TRIP.HMS00359}attP2  |
| 40842 | sina     | FBgn0003410 | CG9949  | P{TRIP.HMS02008}attP40 |
| 38258 | sinu     | FBgn0010894 | CG10624 | P{TRIP.HMS01702}attP40 |
| 56933 | sip1     | FBgn0024191 | CG7238  | P{TRIP.HMC04372}attP40 |
| 33691 | sip2     | FBgn0031878 | CG9188  | P{TRIP.HMS00559}attP2  |
| 50609 | sip3     | FBgn0039875 | CG1937  | P{TRIP.HMC02976}attP2  |
| 6870  | sip3     | FBgn0039875 | CG1937  | VDRC.6870              |
| 32481 | Sir2     | FBgn0024291 | CG5216  | P{TRIP.HMS00484}attP2  |
| 32482 | Sir2     | FBgn0038788 | CG5085  | P{TRIP.HMS00485}attP2  |
| 33984 | Sir4     | FBgn0029783 | CG3187  | P{TRIP.HMS00944}attP2  |
| 34530 | Sir6     | FBgn0037802 | CG6284  | P{TRIP.HMS01009}attP2  |
| 32483 | Sir7     | FBgn0039631 | CG11305 | P{TRIP.HMS00486}attP2  |
| 29330 | sisA     | FBgn0003411 | CG1641  | P{TRIP.JF02492}attP2   |
| 30510 | Six4     | FBgn0027364 | CG3871  | P{TRIP.HMS05254}attP2  |
| 39060 | siz      | FBgn0026179 | CG32434 | P{TRIP.HMS01980}attP40 |
| 27238 | SK       | FBgn0029761 | CG10706 | P{TRIP.JF02571}attP2   |
| 36747 | Sk1      | FBgn0030300 | CG1747  | P{TRIP.HMS03007}attP2  |
| 36741 | Sk2      | FBgn0052484 | CG32484 | P{TRIP.HMS03001}attP40 |
| 35570 | Sk2      | FBgn0052484 | CG32484 | P{TRIP.GL00034}attP2   |
| 55168 | skap     | FBgn0037643 | CG11963 | P{TRIP.HMC03847}attP40 |
| 34630 | skd      | FBgn0003415 | CG9936  | P{TRIP.HMS01305}attP2  |
| 34484 | skd      | FBgn0003415 | CG9936  | P{TRIP.HMS01362}attP2  |
| 31622 | Skeletor | FBgn0262717 | CG43161 | P{TRIP.JF01407}attP2   |
| 28678 | skl      | FBgn0036786 | CG13701 | P{TRIP.JF03093}attP2   |
| 32991 | skpA     | FBgn0025637 | CG16983 | P{TRIP.HMS00791}attP2  |
| 33925 | skpC     | FBgn0026175 | CG11941 | P{TRIP.HMS00871}attP2  |
| 57578 | skpE     | FBgn0031074 | CG11942 | P{TRIP.HMC04636}attP40 |
| 27715 | sktl     | FBgn0016984 | CG9985  | P{TRIP.JF02796}attP2   |
| 32906 | sl       | FBgn0003416 | CG4200  | P{TRIP.HMS00695}attP2  |
| 27043 | slbo     | FBgn0005638 | CG4354  | P{TRIP.JF02369}attP2   |
| 51171 | Slbp     | FBgn0041186 | CG11886 | P{TRIP.HMJ21114}attP40 |
| 54047 | Sld5     | FBgn0039403 | CG14549 | P{TRIP.HMJ21490}attP40 |

|       |                         |                           |                         |                        |
|-------|-------------------------|---------------------------|-------------------------|------------------------|
| 32969 | sle                     | FBgn0037810               | CG12819                 | P{TRiP.HMS00766}attP2  |
| 51811 | sigA                    | FBgn0003423               | CG1417                  | P{TRiP.HMC03382}attP40 |
| 34335 | Slh                     | FBgn0015816               | CG3539                  | P{TRiP.HMS01323}attP2  |
| 31468 | sli                     | FBgn0003425               | CG43758                 | P{TRiP.JF01229}attP2   |
| 35179 | slik                    | FBgn0035001               | CG4527                  | P{TRiP.GL00051}attP2   |
| 34376 | sliim                   | FBgn0261477               | CG5186                  | P{TRiP.HMS01366}attP2  |
| 29437 | slim                    | FBgn0261477               | CG5186                  | P{TRiP.JF03373}attP2   |
| 51724 | Slip1                   | FBgn0024728               | CG1783                  | P{TRiP.HMC03268}attP2  |
| 33986 | sllmb                   | FBgn0023423               | CG3412                  | P{TRiP.HMS00946}attP2  |
| 26247 | slo                     | FBgn0003429               | CG10693                 | P{TRiP.JF02146}attP2   |
| 27492 | Slob                    | FBgn0024290               | CG43756                 | P{TRiP.JF02642}attP2   |
| 29344 | siou                    | FBgn0002941               | CG6534                  | P{TRiP.JF02506}attP2   |
| 34633 | slp1                    | FBgn0003430               | CG16738                 | P{TRiP.HMS01107}attP2  |
| 34634 | slp2                    | FBgn0004567               | CG2939                  | P{TRiP.HMS01108}attP2  |
| 32948 | slpr                    | FBgn0030018               | CG2272                  | P{TRiP.HMS00742}attP2  |
| 31539 | sis                     | FBgn0086906               | CG1915                  | P{TRiP.JF01099}attP2   |
| 55366 | Slu7                    | FBgn0039626               | CG1420                  | P{TRiP.HMC04054}attP40 |
| 29388 | siv                     | FBgn0025469               | CG8717                  | P{TRiP.JF03320}attP2   |
| 34949 | slx 1                   | FBgn0037263               | CG18271                 | P{TRiP.HMS00313}attP2  |
| 28887 | SmB                     | FBgn0262601               | CG5352                  | P{TRiP.HM05097}attP2   |
| 34351 | SMC 1                   | FBgn0040283               | CG6057                  | P{TRiP.HMS01340}attP2  |
| 32369 | SMC2                    | FBgn0027783               | CG10212                 | P{TRiP.HMS00360}attP2  |
| 56035 | Smc5                    | FBgn0052438               | CG32438                 | P{TRiP.HMC04343}attP2  |
| 34834 | SmD 1                   | FBgn0261933               | CG10753                 | P{TRiP.HMS00150}attP2  |
| 55163 | SmD2                    | FBgn0261789               | CG1249                  | P{TRiP.HMC03839}attP40 |
| 42633 | SmD3                    | FBgn0023167               | CG8427                  | P{TRiP.HMS02469}attP40 |
| 33664 | SmE                     | FBgn0261790               | CG18591                 | P{TRiP.HMS00074}attP2  |
| 26734 | SmF                     | FBgn0000426               | CG16792                 | P{TRiP.JF02276}attP2   |
| 35477 | smg                     | FBgn0016070               | CG5263                  | P{TRiP.GL00406}attP2   |
| 57304 | SmG                     | FBgn0261791               | CG9742                  | P{TRiP.HMS04502}attP40 |
| 31090 | Smg5                    | FBgn0019890               | CG8954                  | P{TRiP.JF01554}attP2   |
| 36808 | smid                    | FBgn0016983               | CG8571                  | P{TRiP.GL01024}attP40  |
| 26288 | Smn                     | FBgn0036641               | CG16725                 | P{TRiP.JF02057}attP2   |
| 27037 | smo                     | FBgn0003444               | CG11561                 | P{TRiP.JF02363}attP2   |
| 41670 | Smox                    | FBgn0025800               | CG2262                  | P{TRiP.HMS02203}attP40 |
| 34528 | Smr                     | FBgn0024308               | CG4013                  | P{TRiP.HMS00952}attP2  |
| 36125 | smt3                    | FBgn0026170               | CG4494                  | P{TRiP.HMS01540}attP2  |
| 28034 | smt3                    | FBgn0026170               | CG4494                  | P{TRiP.JF02869}attP2   |
| 53682 | Smyd4                   | FBgn0036282               | CG14122                 | P{TRiP.HMJ21595}attP40 |
| 42615 | sn                      | FBgn0003447               | CG32858                 | P{TRiP.HMS02450}attP2  |
| 34906 | sna                     | FBgn0003448               | CG3956                  | P{TRiP.HMS01252}attP2  |
| 43248 | snama                   | FBgn0086129               | CG3231                  | P{TRiP.GLC01436}attP2  |
| 34088 | Snap                    | FBgn0250791               | CG6625                  | P{TRiP.HMS00872}attP2  |
| 29587 | Snap                    | FBgn0250791               | CG6625                  | P{TRiP.JF03266}attP2   |
| 28719 | Snap24                  | FBgn0028401               | CG9474                  | P{TRiP.JF03146}attP2   |
| 48033 | Snap24                  | FBgn0028401               | CG9474                  | VDRC.48033             |
| 34377 | Snap25                  | FBgn0011288               | CG40452                 | P{TRiP.HMS01367}attP2  |
| 40837 | snapi                   | FBgn0031455               | CG9958                  | P{TRiP.HMS02003}attP40 |
| 27541 | snapi                   | FBgn0031454               | CG9960                  | P{TRiP.JF02692}attP2   |
| 32420 | SNCF                    | FBgn0036349               | CG14112                 | P{TRiP.HMS00415}attP2  |
| 34593 | snf                     | FBgn0003449               | CG4528                  | P{TRiP.HMS01067}attP2  |
| 32371 | SNF 1A                  | FBgn0023169               | CG3051                  | P{TRiP.HMS00362}attP2  |
| 34726 | SNF4Agamma              | FBgn0025803               | CG17299                 | P{TRiP.HMS01205}attP2  |
| 31978 | sni                     | FBgn0030026               | CG10964                 | P{TRiP.JF03412}attP2   |
| 41723 | snk                     | FBgn0003450               | CG7996                  | P{TRiP.HMS02289}attP2  |
| 58126 | Snmp1                   | FBgn0260004               | CG7000                  | P{TRiP.HMJ22075}attP40 |
| 51432 | Snmp2                   | FBgn0035815               | CG7422                  | P{TRiP.HMC03144}attP2  |
| 31934 | Snoo                    | FBgn0085450               | CG34421                 | P{TRiP.JF02225}attP2   |
| 33434 | Snp                     | FBgn0265192               | CG44248                 | P{TRiP.HMS00321}attP2  |
| 25867 | sNPF                    | FBgn0032840               | CG13968                 | P{TRiP.JF01906}attP2   |
| 27507 | sNPF-R                  | FBgn0036934               | CG7395                  | P{TRiP.JF02657}attP2   |
| 32372 | Snr1                    | FBgn0011715               | CG1064                  | P{TRiP.HMS00363}attP2  |
| 55164 | snRNA:U12:73B           | FBgn0041721               | CR32162                 | P{HMC03841}attP40      |
| 55689 | snRNA:U4:38AB           | FBgn0003931               | CR32879                 | P{TRiP.HMC03903}attP40 |
| 55361 | snRNA:U5:38ABa          | FBgn0043022               | CR32881                 | P{HMC04048}attP40      |
| 55700 | snRNA:U5:38ABb,snRNA:U5 | FBgn0043021 FBgn0003933 F | CR32880,CR32914,CR32995 | P{HMC03915}attP40      |
| 55637 | snRNA:U5:38ABb,snRNA:U5 | FBgn0043021 FBgn0003938 F | CR32880,CR32908,CR32914 | P{TRiP.HMC03784}attP40 |
| 55676 | snRNA:U5:63BC           | FBgn0003938               | CR32908                 | P{TRiP.HMC03840}attP40 |

|         |                  |             |         |                        |
|---------|------------------|-------------|---------|------------------------|
| 55666   | snRNA:U6atac:29B | FBgn0041717 | CR32989 | P{TRIP.HMC03821}attP40 |
| 33396   | snRNP-U1-70K     | FBgn0016978 | CG8749  | P{TRIP.HMS00274}attP2  |
| F001301 | snRNP-U1-70K     | FBgn0016978 | CG8749  | M{UAS-snRNP-U1-70K.ORF |
| 55358   | snRNP-U1-C       | FBgn0261792 | CG5454  | P{TRIP.HMC04045}attP40 |
| 38992   | Snx16            | FBgn0034265 | CG6410  | P{TRIP.HMS01908}attP40 |
| 45572   | Snx16            | FBgn0034265 | CG6410  | VDR.C.45572            |
| 50633   | Snx3             | FBgn0038065 | CG6359  | P{TRIP.HMC03000}attP40 |
| 38278   | Snx6             | FBgn0032005 | CG8282  | P{TRIP.HMS01729}attP40 |
| 39036   | snz              | FBgn0029976 | CG1514  | P{TRIP.HMS01956}attP40 |
| 35028   | so               | FBgn0003460 | CG11121 | P{TRIP.HMS01441}attP2  |
| 34648   | sob              | FBgn0004892 | CG3242  | P{TRIP.HMS01123}attP2  |
| 33397   | Sobp             | FBgn0033654 | CG8991  | P{TRIP.HMS00275}attP2  |
| 35036   | Socs36E          | FBgn0041184 | CG15154 | P{TRIP.HMS01450}attP2  |
| 42830   | Socs44A          | FBgn0033266 | CG2160  | P{TRIP.HMS02515}attP2  |
| 34616   | Sod              | FBgn0003462 | CG11793 | P{TRIP.HMS01291}attP2  |
| 32983   | Sod2             | FBgn0010213 | CG8905  | P{TRIP.HMS00783}attP2  |
| 34556   | Sodh-1           | FBgn0024289 | CG1982  | P{TRIP.HMS01028}attP2  |
| 53353   | Sodh-2           | FBgn0022359 | CG4649  | P{TRIP.HMC03582}attP40 |
| 29463   | sol              | FBgn0003464 | CG1391  | P{TRIP.JF03400}attP2   |
| 31246   | Sop2             | FBgn0001961 | CG8978  | P{TRIP.JF01763}attP2   |
| 34833   | Sos              | FBgn0001965 | CG7793  | P{TRIP.HMS00149}attP2  |
| 42955   | soti             | FBgn0038225 | CG8489  | P{TRIP.HMS02648}attP40 |
| 35656   | Sox100B          | FBgn0024288 | CG15552 | P{TRIP.GLV21021}attP2  |
| 26220   | Sox102F          | FBgn0039938 | CG11153 | P{TRIP.JF02118}attP2   |
| 34794   | Sox14            | FBgn0005612 | CG3090  | P{TRIP.HMS00103}attP2  |
| 57264   | Sox15            | FBgn0005613 | CG8404  | P{TRIP.HMC04657}attP40 |
| 31902   | Sox21a           | FBgn0036411 | CG7345  | P{TRIP.JF02191}attP2   |
| 25996   | SoxN             | FBgn0029123 | CG18024 | P{TRIP.JF02018}attP2   |
| 36881   | SoYb             | FBgn0051755 | CG31755 | P{TRIP.GL01045}attP2   |
| 35777   | Sp1              | FBgn0020378 | CG1343  | P{TRIP.HMS01526}attP2  |
| 43997   | SP1029           | FBgn0263236 | CG11956 | P{TRIP.HMS02711}attP2  |
| 3335    | SP1029           | FBgn0263236 | CG11956 | VDR.C.3335             |
| 42858   | Sp212            | FBgn0053329 | CG33329 | P{TRIP.HMS02550}attP40 |
| 51732   | SP2353           | FBgn0034070 | CG8403  | P{TRIP.HMC03287}attP2  |
| 37522   | SP2637           | FBgn0034371 | CG5473  | P{TRIP.HMS01664}attP40 |
| 29555   | SP555            | FBgn0260470 | CG14041 | P{TRIP.JF03232}attP2   |
| 41612   | Sp7              | FBgn0037515 | CG3066  | P{TRIP.GL01194}attP40  |
| 38371   | spag             | FBgn0015544 | CG13570 | P{TRIP.HMS01840}attP2  |
| 33915   | Spargel          | FBgn0037248 | CG9809  | P{TRIP.HMS00858}attP2  |
| 27570   | spas             | FBgn0039141 | CG5977  | P{TRIP.JF02724}attP2   |
| 31499   | Spase22-23       | FBgn0039172 | CG5677  | P{TRIP.HM04003}attP2   |
| 51935   | Spat             | FBgn0014031 | CG3926  | P{TRIP.HMC03220}attP40 |
| 38534   | Spc105R          | FBgn0037025 | CG11451 | P{TRIP.HMS01752}attP2  |
| 51516   | Spc25            | FBgn0087021 | CG7242  | P{TRIP.HMS03161}attP2  |
| 31227   | spdo             | FBgn0260440 | CG31020 | P{TRIP.JF01806}attP2   |
| 33926   | SPE              | FBgn0039102 | CG16705 | P{TRIP.HMS000873}attP2 |
| 33398   | spen             | FBgn0016977 | CG18497 | P{TRIP.HMS00276}attP2  |
| 41954   | Spf45            | FBgn0086683 | CG17540 | P{TRIP.HMS02351}attP2  |
| 50896   | spheroide        | FBgn0030774 | CG9675  | P{TRIP.HMC02412}attP2  |
| 55601   | sphinx1          | FBgn0052383 | CG32383 | P{TRIP.HMC03898}attP40 |
| 54468   | sphinx2          | FBgn0052382 | CG32382 | P{TRIP.HMS03736}attP40 |
| 34645   | spi              | FBgn0005672 | CG10334 | P{TRIP.HMS01120}attP2  |
| 37505   | spict            | FBgn0032451 | CG12292 | P{TRIP.HMS01647}attP40 |
| 27702   | spin             | FBgn0086676 | CG8428  | P{TRIP.JF02782}attP2   |
| 34933   | Spindly          | FBgn0031549 | CG15415 | P{TRIP.HMS01283}attP2  |
| 30516   | spir             | FBgn0003475 | CG10076 | P{TRIP.JF03233}attP2   |
| 41620   | spirit           | FBgn0030051 | CG2056  | P{TRIP.GL01202}attP40  |
| 43304   | Sply             | FBgn0010591 | CG8946  | P{TRIP.HMS02684}attP40 |
| 31199   | spn-A            | FBgn0003479 | CG7948  | P{TRIP.JF01716}attP2   |
| 38898   | spn-A            | FBgn0003479 | CG7948  | P{TRIP.GL00669}attP2   |
| 51926   | spn-A            | FBgn0003479 | CG7948  | P{TRIP.HMC03364}attP40 |
| 43158   | spn-B            | FBgn0003480 | CG3325  | P{TRIP.GL01500}attP2   |
| 55403   | spn-B            | FBgn0003480 | CG3325  | P{TRIP.HMC04091}attP40 |
| 34808   | spn-E            | FBgn0003483 | CG3158  | P{TRIP.HMS00117}attP2  |
| 41617   | Spn1             | FBgn0028988 | CG9456  | P{TRIP.GL01199}attP40  |
| 51445   | Spn27A           | FBgn0028990 | CG11331 | P{TRIP.HMC03159}attP2  |
| 42474   | Spn28B           | FBgn0083141 | CG6717  | P{TRIP.GL01336}attP40  |
| 50670   | Spn28Dc          | FBgn0031973 | CG7219  | P{TRIP.HMC03071}attP2  |

|       |           |             |         |                        |
|-------|-----------|-------------|---------|------------------------|
| 41619 | Spn28F    | FBgn0028987 | CG8137  | P(TRIP.GL01201)attP40  |
| 41632 | Spn3      | FBgn0028986 | CG9334  | P(TRIP.GL01214)attP40  |
| 41722 | Spn4      | FBgn0028985 | CG9453  | P(TRIP.HMS02288)attP2  |
| 28737 | Spn42Db   | FBgn0033112 | CG9454  | P(TRIP.JF03164)attP2   |
| 31757 | Spn42Dc   | FBgn0033113 | CG9455  | P(TRIP.HM04068)attP2   |
| 31564 | Spn42De   | FBgn0033115 | CG9460  | P(TRIP.JF01137)attP2   |
| 41972 | Spn43Aa   | FBgn0024294 | CG12172 | P(TRIP.HMS02370)attP2  |
| 41616 | Spn43Ab   | FBgn0024293 | CG1865  | P(TRIP.GL01198)attP40  |
| 56927 | Spn53F    | FBgn0034195 | CG10956 | P(TRIP.HMC04366)attP40 |
| 43309 | Spn55B    | FBgn0028983 | CG10913 | P(TRIP.HMS02693)attP2  |
| 41614 | Spn55B    | FBgn0028983 | CG10913 | P(TRIP.GL01196)attP40  |
| 51437 | Spn75F    | FBgn0052203 | CG32203 | P(TRIP.HMC03151)attP2  |
| 44563 | Spn77Bc   | FBgn0036970 | CG6289  | P(TRIP.HMS02859)attP40 |
| 42485 | Spn88Ea   | FBgn0028984 | CG18525 | P(TRIP.GL01344)attP40  |
| 34381 | Spn88Ea   | FBgn0028984 | CG18525 | P(TRIP.HMS01371)attP2  |
| 51496 | spo       | FBgn0003486 | CG10594 | P(TRIP.HMC03251)attP2  |
| 28352 | SPoCk     | FBgn0052451 | CG32451 | P(TRIP.JF02988)attP2   |
| 51718 | spok      | FBgn0086917 | CG41624 | P(TRIP.HMC03254)attP2  |
| 38205 | spoon     | FBgn0263987 | CG3249  | P(TRIP.GL00644)attP40  |
| 44428 | Spp       | FBgn0031260 | CG11840 | P(TRIP.GL01377)attP2   |
| 32852 | Spred     | FBgn0020767 | CG10155 | P(TRIP.HMS00637)attP2  |
| 35580 | Sps2      | FBgn0032224 | CG5025  | P(TRIP.GL00161)attP2   |
| 55685 | Spt-l     | FBgn0086532 | CG4016  | P(TRIP.HMC03870)attP40 |
| 35148 | Spt3      | FBgn0037981 | CG3169  | P(TRIP.GL00016)attP2   |
| 32896 | spt4      | FBgn0028683 | CG12372 | P(TRIP.HMS00685)attP2  |
| 34837 | Spt5      | FBgn0040273 | CG7626  | P(TRIP.HMS00153)attP2  |
| 32373 | Spt6      | FBgn0028982 | CG12225 | P(TRIP.HMS00364)attP2  |
| 28968 | Sptr      | FBgn0014032 | CG12117 | P(TRIP.HM05179)attP2   |
| 34699 | spz       | FBgn0003495 | CG6134  | P(TRIP.HMS01178)attP2  |
| 56958 | spz3      | FBgn0031959 | CG7104  | P(TRIP.HMC04399)attP40 |
| 57510 | spz6      | FBgn0035056 | CG9196  | P(TRIP.HMC04825)attP40 |
| 31686 | sqd       | FBgn0086897 | CG16901 | P(TRIP.JF01479)attP2   |
| 35627 | sqd       | FBgn0086897 | CG16901 | P(TRIP.HM00473)attP2   |
| 33892 | sqh       | FBgn0003514 | CG3595  | P(TRIP.HMS00830)attP2  |
| 35574 | squ       | FBgn0002652 | CG4711  | P(TRIP.GL00116)attP2   |
| 47103 | squ       | FBgn0002652 | CG4711  | VDRC.47103             |
| 51509 | sqz       | FBgn0010768 | CG5557  | P(TRIP.HMC03279)attP2  |
| 27701 | sr        | FBgn0003499 | CG7847  | P(TRIP.JF02781)attP2   |
| 56012 | Sr-CI     | FBgn0014033 | CG4099  | P(TRIP.HMC04308)attP40 |
| 41949 | Sr-CII    | FBgn0020377 | CG8856  | P(TRIP.HMS02346)attP40 |
| 51504 | Sr-CII    | FBgn0020377 | CG8856  | VDRC.51504             |
| 27260 | sra       | FBgn0086370 | CG6072  | P(TRIP.JF02557)attP2   |
| 38294 | Sra-1     | FBgn0038320 | CG4931  | P(TRIP.HMS01754)attP2  |
| 44039 | Src42A    | FBgn0264959 | CG44128 | P(TRIP.HMS02755)attP40 |
| 30517 | Src64B    | FBgn0262733 | CG7524  | P(TRIP.JF03234)attP2   |
| 36578 | SRm 160   | FBgn0036340 | CG11274 | P(TRIP.GL00538)attP2   |
| 55205 | SRm 160   | FBgn0036340 | CG11274 | P(TRIP.HMC03920)attP40 |
| 34623 | srp       | FBgn0003507 | CG3992  | P(TRIP.HMS01298)attP2  |
| 51160 | Srp19     | FBgn0015298 | CG4457  | P(TRIP.HMC02399)attP2  |
| 30533 | Srp54     | FBgn0024285 | CG4602  | P(TRIP.HM05224)attP2   |
| 34568 | Srp9      | FBgn0035827 | CG8268  | P(TRIP.HMS01041)attP2  |
| 35196 | SRPK      | FBgn0026370 | CG8174  | P(TRIP.GL00070)attP2   |
| 55881 | srpk 79D  | FBgn0025702 | CG11489 | P(TRIP.HMC04154)attP2  |
| 34011 | SrpRbeta  | FBgn0011509 | CG33162 | P(TRIP.HMS00977)attP2  |
| 36644 | Sry-alpha | FBgn0003510 | CG17957 | P(TRIP.GL00604)attP2   |
| 57789 | Sry-delta | FBgn0003512 | CG17958 | P(TRIP.HMC04983)attP40 |
| 33415 | ss        | FBgn0003513 | CG6993  | P(TRIP.HMS00296)attP2  |
| 55683 | Ssadh     | FBgn0039349 | CG4685  | P(TRIP.HMC03868)attP40 |
| 35437 | Ssb-c31a  | FBgn0015299 | CG8396  | P(TRIP.GL00362)attP2   |
| 38948 | ssh       | FBgn0029157 | CG6238  | P(TRIP.HMS01862)attP2  |
| 29464 | Ssl1      | FBgn0037202 | CG11115 | P(TRIP.JF03401)attP2   |
| 29358 | ssp       | FBgn0036248 | CG17153 | P(TRIP.JF02522)attP2   |
| 41837 | ssp2      | FBgn0036389 | CG9028  | P(TRIP.GL01265)attP2   |
| 41719 | Ssrp      | FBgn0010278 | CG4817  | P(TRIP.HMS02285)attP2  |
| 38344 | Ssu72     | FBgn0031054 | CG14216 | P(TRIP.HMS01811)attP2  |
| 42881 | ssx       | FBgn0024987 | CG3056  | P(TRIP.HMS02574)attP2  |
| 50728 | St3       | FBgn0265052 | CG44167 | P(TRIP.HMS02964)attP40 |
| 44528 | ST6Gal    | FBgn0035050 | CG4871  | P(TRIP.HMC02922)attP40 |

|       |              |             |         |                        |
|-------|--------------|-------------|---------|------------------------|
| 36902 | stai         | FBgn0266521 | CG31641 | P{TRIP.GL01099}attP2   |
| 35016 | Stam         | FBgn0027363 | CG6521  | P{TRIP.HMS01429}attP2  |
| 35050 | stan         | FBgn0024836 | CG11895 | P{TRIP.HMS01464}attP2  |
| 27506 | star1        | FBgn0036790 | CG7285  | P{TRIP.JF02656}attP2   |
| 43221 | stas         | FBgn0030850 | CG8408  | P{TRIP.GL01566}attP40  |
| 33637 | Stat92E      | FBgn0016917 | CG4257  | P{TRIP.HMS00035}attP2  |
| 31247 | stau         | FBgn0003520 | CG5753  | P{TRIP.JF01764}attP2   |
| 35690 | stau         | FBgn0003520 | CG5753  | P{TRIP.GLV21055}attP2  |
| 44051 | stc          | FBgn0001978 | CG3647  | P{TRIP.HMS02768}attP40 |
| 31537 | stck         | FBgn0020249 | CG7954  | P{TRIP.JF01097}attP2   |
| 42786 | Ste          | FBgn0003523 |         | P{TRIP.GL01156}attP2   |
| 34996 | ste14        | FBgn0036336 | CG11268 | P{TRIP.HMS01406}attP2  |
| 51880 | ste24a       | FBgn0034176 | CG9000  | P{TRIP.HMC03454}attP40 |
| 50913 | ste24b       | FBgn0034175 | CG9001  | P{TRIP.HMJ21002}attP40 |
| 32374 | step         | FBgn0086779 | CG11628 | P{TRIP.HMS00365}attP2  |
| 57698 | stet         | FBgn0020248 | CG33166 | P{TRIP.GLV01864}attP2  |
| 34831 | stg          | FBgn0003525 | CG1395  | P{TRIP.HMS00146}attP2  |
| 41928 | stg1         | FBgn0064123 | CG33670 | P{TRIP.HMS02325}attP40 |
| 35392 | sti          | FBgn0002466 | CG10522 | P{TRIP.GL00312}attP2   |
| 41648 | stil         | FBgn0003527 | CG8592  | P{TRIP.GL01230}attP2   |
| 27263 | Stim         | FBgn0045073 | CG9126  | P{TRIP.JF02567}attP2   |
| 25807 | stj          | FBgn0261041 | CG12295 | P{TRIP.JF01825}attP2   |
| 34620 | Stk          | FBgn0046692 | CG40293 | P{TRIP.HMS01295}attP2  |
| 39062 | stmA         | FBgn0086784 | CG8739  | P{TRIP.HMS01982}attP40 |
| 28510 | stnA         | FBgn0016976 | CG12500 | P{TRIP.JF03130}attP2   |
| 28510 | stnB         | FBgn0016975 | CG12473 | P{TRIP.JF03130}attP2   |
| 37523 | Strn-Mlck    | FBgn0265045 | CG44162 | P{TRIP.HMS01665}attP40 |
| 43291 | Strn-Mlck    | FBgn0265045 | CG44162 | P{TRIP.HMS02663}attP40 |
| 42564 | stv          | FBgn0086708 | CG32130 | P{TRIP.HMJ02221}attP40 |
| 35415 | stwl         | FBgn0003459 | CG3836  | P{TRIP.GL00337}attP2   |
| 36709 | sty          | FBgn0014388 | CG1921  | P{TRIP.HMS01599}attP2  |
| 36836 | Su(dx)       | FBgn0003557 | CG4244  | P{TRIP.GL01077}attP2   |
| 21814 | Su(dx)       | FBgn0003557 | CG4244  | VDRC.21814             |
| 51664 | Su(dx)       | FBgn0003557 | CG4244  | P{UAS-Su(dx).C}IIa     |
| 43273 | su(f)        | FBgn0003559 | CG17170 | P{TRIP.GLC01462}attP2  |
| 28559 | Su(fu)       | FBgn0005355 | CG6054  | P{TRIP.HMS05045}attP2  |
| 28900 | Su(H)        | FBgn0004837 | CG3497  | P{TRIP.HMS05110}attP2  |
| 34006 | su(Hw)       | FBgn0003567 | CG8573  | P{TRIP.HMS00970}attP2  |
| 32474 | Su(P)        | FBgn0004465 | CG4086  | P{TRIP.HMS00474}attP2  |
| 53339 | su(r)        | FBgn0086450 | CG2194  | P{TRIP.HMC03568}attP40 |
| 33982 | su(s)        | FBgn0003575 | CG6222  | P{TRIP.HMS00942}attP2  |
| 33399 | Su(Tpl)      | FBgn0014037 | CG32217 | P{TRIP.HMS00277}attP2  |
| 32956 | Su(var)2-10  | FBgn0003612 | CG8068  | P{TRIP.HMS00750}attP2  |
| 38255 | Su(var)2-HP2 | FBgn0026427 | CG12864 | P{TRIP.HMS01699}attP40 |
| 33400 | Su(var)205   | FBgn0003607 | CG8409  | P{TRIP.HMS00278}attP2  |
| 32853 | Su(var)3-3   | FBgn0260397 | CG17149 | P{TRIP.HMS00638}attP2  |
| 35368 | Su(var)3-7   | FBgn0003598 | CG8599  | P{TRIP.GL00281}attP2   |
| 32914 | Su(var)3-9   | FBgn0263755 | CG43664 | P{TRIP.HMS00704}attP2  |
| 55175 | su(wal)      | FBgn0003638 | CG3019  | P{TRIP.HMC03856}attP40 |
| 33402 | Su(z)12      | FBgn0020887 | CG8013  | P{TRIP.HMS00280}attP2  |
| 33403 | Su(z)2       | FBgn0265623 | CG3905  | P{TRIP.HMS00281}attP2  |
| 28570 | sub          | FBgn0003545 | CG12298 | P{TRIP.HMS05056}attP2  |
| 50939 | Sucb         | FBgn0029118 | CG10622 | P{TRIP.HMJ21034}attP40 |
| 27026 | sug          | FBgn0033782 | CG3850  | P{TRIP.JF02347}attP2   |
| 36087 | Sur          | FBgn0028675 | CG5772  | P{TRIP.GL00506}attP2   |
| 41883 | Sur-8        | FBgn0038504 | CG5407  | P{TRIP.HMS02299}attP2  |
| 31210 | Surf1        | FBgn0029117 | CG9943  | P{TRIP.JF01729}attP2   |
| 57471 | Surf4        | FBgn0019925 | CG6202  | P{TRIP.HMC04782}attP40 |
| 34563 | Surf6        | FBgn0038746 | CG4510  | P{TRIP.HMS01035}attP2  |
| 36893 | SuUR         | FBgn0025355 | CG7869  | P{TRIP.GL01080}attP2   |
| 27269 | sv           | FBgn0005561 | CG11049 | P{TRIP.JF02582}attP2   |
| 28689 | svp          | FBgn0003651 | CG11502 | P{TRIP.JF03105}attP2   |
| 44487 | svr          | FBgn0004648 | CG4122  | P{TRIP.HMC02395}attP2  |
| 30505 | sw           | FBgn0003654 | CG18000 | P{TRIP.HMS05249}attP2  |
| 30484 | swa          | FBgn0003655 | CG3429  | P{TRIP.HMS05222}attP2  |
| 28530 | swi2         | FBgn0034262 | CG14485 | P{TRIP.HMS05016}attP2  |
| 42916 | swif         | FBgn0050366 | CG30366 | P{TRIP.HMS02609}attP40 |
| 55961 | Swim         | FBgn0034709 | CG3074  | P{TRIP.HMC04255}attP40 |

|       |             |             |         |                        |
|-------|-------------|-------------|---------|------------------------|
| 28548 | swm         | FBgn0002044 | CG10084 | P(TRIP.HM05034)attP2   |
| 31993 | sws         | FBgn0003656 | CG2212  | P(TRIP.JF03428)attP2   |
| 50909 | sxc         | FBgn0261403 | CG10392 | P(TRIP.HMJ03131)attP40 |
| 34393 | Sxl         | FBgn0264270 | CG43770 | P(TRIP.HMS00609)attP2  |
| 38195 | Sxl         | FBgn0264270 | CG43770 | P(TRIP.GL00634)attP40  |
| 39067 | Syb         | FBgn0003660 | CG12210 | P(TRIP.HMS01987)attP40 |
| 44014 | Syb         | FBgn0003660 | CG12210 | P(TRIP.HMS02728)attP40 |
| 43232 | syd         | FBgn0024187 | CG8110  | P(TRIP.GLC01419)attP2  |
| 39041 | Sym         | FBgn0037371 | CG2097  | P(TRIP.HMS01961)attP40 |
| 27304 | Syn         | FBgn0004575 | CG3985  | P(TRIP.JF02613)attP2   |
| 27504 | Syn1        | FBgn0037130 | CG7152  | P(TRIP.JF02654)attP2   |
| 42601 | Syn2        | FBgn0034135 | CG4905  | P(TRIP.HMS02433)attP40 |
| 38274 | synaptryrin | FBgn0033876 | CG10808 | P(TRIP.HMS01724)attP40 |
| 27297 | Synd        | FBgn0053094 | CG33094 | P(TRIP.JF02607)attP2   |
| 34378 | synj        | FBgn0034691 | CG6562  | P(TRIP.HMS01368)attP2  |
| 44420 | synj        | FBgn0034691 | CG6562  | P(TRIP.GLC01354)attP40 |
| 56972 | Syp         | FBgn0038826 | CG17838 | P(TRIP.HMC04412)attP40 |
| 31668 | Syt1        | FBgn0004242 | CG3139  | P(TRIP.JF01461)attP2   |
| 38978 | Syt12       | FBgn0261085 | CG10617 | P(TRIP.HMS01894)attP40 |
| 28365 | Syt14       | FBgn0261086 | CG9778  | P(TRIP.JF03001)attP2   |
| 39016 | Syt4        | FBgn0028400 | CG10047 | P(TRIP.HMS01934)attP40 |
| 27279 | Syt7        | FBgn0039900 | CG2381  | P(TRIP.JF02590)attP2   |
| 29308 | Sytalpha    | FBgn0261089 | CG5559  | P(TRIP.JF02448)attP2   |
| 41882 | Sytbeta     | FBgn0261090 | CG42333 | P(TRIP.HMS02296)attP2  |
| 38525 | Syx13       | FBgn0036341 | CG11278 | P(TRIP.HMS01723)attP40 |
| 25884 | Syx16       | FBgn0031106 | CG1467  | P(TRIP.JF01924)attP2   |
| 51856 | Syx16       | FBgn0031106 | CG1467  | P(TRIP.HMC03430)attP40 |
| 25896 | Syx17       | FBgn0035540 | CG7452  | P(TRIP.JF01937)attP2   |
| 26721 | Syx18       | FBgn0039212 | CG13626 | P(TRIP.JF02263)attP2   |
| 1209  | Syx18       | FBgn0039212 | CG13626 | VDRC.1209              |
| 25811 | Syx1A       | FBgn0013343 | CG31136 | P(TRIP.JF01829)attP2   |
| 31198 | Syx4        | FBgn0024980 | CG2715  | P(TRIP.JF01714)attP2   |
| 29397 | Syx5        | FBgn0011708 | CG4214  | P(TRIP.JF03330)attP2   |
| 28505 | Syx6        | FBgn0037084 | CG7736  | P(TRIP.JF03125)attP2   |
| 29546 | Syx7        | FBgn0267849 | CG5081  | P(TRIP.JF02436)attP2   |
| 26013 | Syx8        | FBgn0036643 | CG4109  | P(TRIP.JF02038)attP2   |
| 32854 | T-cp1       | FBgn0003676 | CG5374  | P(TRIP.HMS00639)attP2  |
| 41684 | T48         | FBgn0004359 | CG5507  | P(TRIP.HMS02248)attP2  |
| 29417 | Tab2        | FBgn0086358 | CG7417  | P(TRIP.JF03353)attP2   |
| 32421 | Taf1        | FBgn0010355 | CG17603 | P(TRIP.HMS00416)attP2  |
| 35239 | Taf10       | FBgn0028398 | CG2859  | P(TRIP.GL00125)attP2   |
| 57555 | Taf10b      | FBgn0026324 | CG3069  | P(TRIP.HMC04872)attP40 |
| 34852 | Taf12       | FBgn0011290 | CG17358 | P(TRIP.HMS00170)attP2  |
| 35427 | Taf4        | FBgn0010280 | CG5444  | P(TRIP.GL00351)attP2   |
| 35367 | Taf5        | FBgn0010356 | CG7704  | P(TRIP.GL00280)attP2   |
| 57181 | Taf6        | FBgn0010417 | CG32211 | P(TRIP.HMC04563)attP40 |
| 55216 | Taf7        | FBgn0024909 | CG2670  | P(TRIP.GLC01833)attP2  |
| 57267 | Taf8        | FBgn0022724 | CG7128  | P(TRIP.HMC04661)attP40 |
| 32885 | tai         | FBgn0041092 | CG13109 | P(TRIP.HMS00673)attP2  |
| 33404 | Tak1        | FBgn0026323 | CG18492 | P(TRIP.HMS00282)attP2  |
| 31263 | Tak1        | FBgn0046689 | CG31421 | P(TRIP.JF01204)attP2   |
| 55899 | Tak12       | FBgn0039015 | CG4803  | P(TRIP.HMC04181)attP2  |
| 31884 | Takr86C     | FBgn0004841 | CG6515  | P(TRIP.JF02160)attP2   |
| 27513 | Takr99D     | FBgn0004622 | CG7887  | P(TRIP.JF02663)attP2   |
| 51709 | Tal         | FBgn0023477 | CG2827  | P(TRIP.HMC03227)attP40 |
| 31098 | tam         | FBgn0004406 | CG8987  | P(TRIP.JF01563)attP2   |
| 32855 | tan         | FBgn0028980 | CG6586  | P(TRIP.HMS00640)attP2  |
| 57165 | Tango10     | FBgn0030330 | CG1841  | P(TRIP.HMC04546)attP40 |
| 43166 | Tango11     | FBgn0050404 | CG30404 | P(TRIP.GL01508)attP2   |
| 31571 | Tango14     | FBgn0031312 | CG4775  | P(TRIP.JF01144)attP2   |
| 42499 | Tango14     | FBgn0031312 | CG4775  | VDRC.42499             |
| 33883 | Tango6      | FBgn0032728 | CG18398 | P(TRIP.HMS00820)attP2  |
| 32879 | Tango7      | FBgn0033902 | CG8309  | P(TRIP.HMS00667)attP2  |
| 51012 | Tango8      | FBgn0040737 | CG14503 | P(TRIP.HMJ21129)attP40 |
| 34364 | Tango9      | FBgn0260744 | CG10007 | P(TRIP.HMS01353)attP2  |
| 41936 | Tao         | FBgn0031030 | CG14217 | P(TRIP.HMS02333)attP40 |
| 34881 | Tao         | FBgn0031030 | CG14217 | P(TRIP.HMS01226)attP2  |
| 34985 | tap         | FBgn0015550 | CG7659  | P(TRIP.HMS01395)attP2  |



|       |               |                         |                 |                        |
|-------|---------------|-------------------------|-----------------|------------------------|
| 55625 | Tap42         | FBgn0051852             | CG31852         | P(TRIP.HMC03769)attP40 |
| 31634 | tar a         | FBgn0040071             | CG6889          | P(TRIP.JF01421)attP2   |
| 28015 | Task6         | FBgn0038165             | CG9637          | P(TRIP.JF02849)attP2   |
| 27264 | Task7         | FBgn0037690             | CG9361          | P(TRIP.JF02568)attP2   |
| 40875 | tau           | FBgn0051057             | CG45110         | P(TRIP.HMS02042)attP40 |
| 31694 | Taz           | FBgn0026619             | CG8766          | P(TRIP.JF01748)attP2   |
| 56963 | Tb            | FBgn0243586             | CG5480          | P(TRIP.HMC04404)attP40 |
| 44569 | tbce          | FBgn0033055             | CG7861          | P(TRIP.HMS02865)attP40 |
| 34537 | tbce          | FBgn0033055             | CG7861          | P(UAS-tbce.RNAi.J)3    |
| 34536 | tbce          | FBgn0033055             | CG7861          | P(UAS-tbce.J)3         |
| 27667 | Tbh           | FBgn0010329             | CG1543          | P(TRIP.JF02746)attP2   |
| 42770 | Tbp           | FBgn0003687             | CG9874          | P(TRIP.GL00726)attP2   |
| 32422 | Tbp-1         | FBgn0028684             | CG10370         | P(TRIP.HMS00417)attP2  |
| 39014 | TBPH          | FBgn0025790             | CG10327         | P(TRIP.HMS01932)attP40 |
| 34931 | Tcp-1eta      | FBgn0037632             | CG8351          | P(TRIP.HMS01281)attP2  |
| 43146 | Tcp-1zeta     | FBgn0027329             | CG8231          | P(TRIP.HM01487)attP40  |
| 32911 | Tctp          | FBgn0037874             | CG4800          | P(TRIP.HMS00701)attP2  |
| 25801 | Tdc1          | FBgn0259977             | CG30445         | P(TRIP.JF01819)attP2   |
| 25871 | Tdc2          | FBgn0050446             | CG30446         | P(TRIP.JF01910)attP2   |
| 57210 | tectonic      | FBgn0261697             | CG42731         | P(TRIP.HMC04593)attP40 |
| 31046 | tef           | FBgn0086350             | CG8961          | P(TRIP.JF01493)attP2   |
| 37488 | tef           | FBgn0086350             | CG8961          | P(TRIP.GLV21094)attP2  |
| 31635 | tefu          | FBgn0045035             | CG6535          | P(TRIP.JF01422)attP2   |
| 29533 | Tehao         | FBgn0026760             | CG7121          | P(TRIP.HM05212)attP2   |
| 41929 | tej           | FBgn0033921             | CG8589          | P(TRIP.HMS02326)attP40 |
| 29439 | Ten-a         | FBgn0267001             | CG42338         | P(TRIP.JF03375)attP2   |
| 29390 | Ten-m         | FBgn0004449             | CG5723          | P(TRIP.JF03323)attP2   |
| 56020 | Tep3          | FBgn0041181             | CG7068          | P(TRIP.HMC04316)attP40 |
| 32856 | Tepl          | FBgn0041183             | CG18096         | P(TRIP.HMS00641)attP2  |
| 35469 | TeplV         | FBgn0041180             | CG10363         | P(TRIP.GL00395)attP2   |
| 42650 | Tequila       | FBgn0023479             | CG4821          | P(TRIP.HMS02486)attP2  |
| 32869 | TER94         | FBgn0286784             | CG2331          | P(TRIP.HMS00656)attP2  |
| 35681 | term          | FBgn0003683             | CG4216          | P(TRIP.GLV21046)attP2  |
| 26744 | TFAM          | FBgn0038805             | CG4217          | P(TRIP.JF02307)attP2   |
| 57409 | Tfb1          | FBgn0033929             | CG8151          | P(TRIP.HMC04714)attP40 |
| 44631 | Tfb4          | FBgn0031309             | CG5041          | P(TRIP.GLC01602)attP2  |
| 35592 | Tfb5          | FBgn0259719             | FBgn0031668     | P(TRIP.GL00429)attP2   |
| 35800 | TfIA-S        | FBgn0013347             | CG5163          | P(TRIP.GL00359)attP2   |
| 42769 | TfIA-S-2      | FBgn0040338             | CG11639         | P(TRIP.GL00725)attP2   |
| 57414 | TfIIEbeta     | FBgn0015829             | CG1276          | P(TRIP.HMC04720)attP40 |
| 35428 | TfIIFalpha    | FBgn0010282             | CG10281         | P(TRIP.GL00352)attP2   |
| 57413 | TfIIFbeta     | FBgn0010421             | CG6538          | P(TRIP.HMC04719)attP40 |
| 34642 | TfIIS         | FBgn0010422             | CG3710          | P(TRIP.HMS01117)attP2  |
| 26740 | tgo           | FBgn0264075             | CG11987         | P(TRIP.JF02302)attP2   |
| 33597 | th            | FBgn0260635             | CG12284         | P(TRIP.HMS00752)attP2  |
| 38934 | TH1           | FBgn0010416             | CG9984          | P(TRIP.HMS00283)attP40 |
| 30514 | Thd1          | FBgn0026869             | CG1981          | P(TRIP.JF02486)attP2   |
| 53362 | thetaTry      | FBgn0011555             | CG12385         | P(TRIP.HMC03591)attP40 |
| 34546 | Thiolase      | FBgn0025352             | CG4581          | P(TRIP.HMS01017)attP2  |
| 28537 | tho2          | FBgn0031390             | CG31671         | P(TRIP.HM05023)attP2   |
| 50990 | thoc5         | FBgn0034939             | CG2980          | P(TRIP.HMJ21101)attP40 |
| 36667 | Thor          | FBgn0261560             | CG8846          | P(TRIP.HMS01555)attP40 |
| 54005 | Tie           | FBgn0014073             | CG7525          | P(TRIP.HMJ21428)attP40 |
| 35462 | Tif-IA        | FBgn0032988             | CG3278          | P(TRIP.GL00388)attP2   |
| 31570 | Tig           | FBgn0011722             | CG11527         | P(TRIP.JF01143)attP2   |
| 29391 | tiIB          | FBgn0014395             | CG14620         | P(TRIP.JF03324)attP2   |
| 40864 | tim           | FBgn0014396             | CG3234          | P(TRIP.HMS02031)attP40 |
| 58151 | Tim17a2       | FBgn0037307             | CG14666         | P(TRIP.HMJ22102)attP40 |
| 31082 | Tim8          | FBgn0027359             | CG1728          | P(TRIP.JF01533)attP2   |
| 55888 | Tim9b,CG12788 | FBgn0027358 FBgn0031041 | CG17767,CG12788 | P(TRIP.HMC04162)attP2  |
| 36863 | timeout       | FBgn0038118             | CG7855          | P(TRIP.GL00526)attP2   |
| 28539 | tin           | FBgn0004110             | CG7895          | P(TRIP.HM05025)attP2   |
| 35812 | tio           | FBgn0028979             | CG12630         | P(TRIP.HMS01527)attP2  |
| 28563 | Tip60         | FBgn0026080             | CG6121          | P(TRIP.HM05049)attP2   |
| 26249 | tipE          | FBgn0003710             | CG1232          | P(TRIP.JF02148)attP2   |
| 35434 | Tis11         | FBgn0011837             | CG4070          | P(TRIP.GL00358)attP2   |
| 25987 | tj            | FBgn0000964             | CG10034         | P(TRIP.JF02009)attP2   |
| 34595 | tj            | FBgn0000964             | CG10034         | P(TRIP.HMS01069)attP2  |

|       |           |             |         |                        |
|-------|-----------|-------------|---------|------------------------|
| 25800 | Tk        | FBgn0037976 | CG14734 | P{TRIP.JF01818}attP2   |
| 38251 | tko       | FBgn0003714 | CG7925  | P{TRIP.HMS01695}attP40 |
| 40937 | tkv       | FBgn0003716 | CG14026 | P{TRIP.HMS02185}attP40 |
| 31044 | TI        | FBgn0262473 | CG5490  | P{TRIP.JF01491}attP2   |
| 35628 | TI        | FBgn0262473 | CG5490  | P{TRIP.GL00474}attP2   |
| 51507 | tl        | FBgn0003719 | CG6868  | P{TRIP.HMC03275}attP2  |
| 33983 | tlk       | FBgn0283657 | CG34412 | P{TRIP.HMS00943}attP2  |
| 34329 | tl        | FBgn0003720 | CG1378  | P{TRIP.HMS01316}attP2  |
| 38232 | Tm1       | FBgn0003721 | CG4898  | P{TRIP.HMS01676}attP40 |
| 41695 | Tm2       | FBgn0004117 | CG4843  | P{TRIP.HMS02260}attP2  |
| 39048 | TM4SF     | FBgn0020372 | CG11303 | P{TRIP.HMS01968}attP40 |
| 54019 | TM9SF4    | FBgn0028541 | CG7364  | P{TRIP.HMJ21445}attP40 |
| 41718 | tm        | FBgn0082582 | CG1539  | P{TRIP.HMS02283}attP2  |
| 42826 | tn        | FBgn0265356 | CG15105 | P{TRIP.HMS02508}attP40 |
| 29372 | tna       | FBgn0026160 | CG7958  | P{TRIP.JF02536}attP2   |
| 38299 | Tob       | FBgn0028397 | CG9214  | P{TRIP.HMS01760}attP40 |
| 53379 | tobi      | FBgn0261575 | CG11909 | P{TRIP.HMJ02101}attP40 |
| 29345 | toe       | FBgn0036285 | CG10704 | P{TRIP.JF02507}attP2   |
| 28543 | Toll-4    | FBgn0032095 | CG18241 | P{TRIP.HM05029}attP2   |
| 47966 | Toll-4    | FBgn0032095 | CG18241 | VDR C.47966            |
| 56048 | Toll-6    | FBgn0036494 | CG7250  | P{TRIP.HMS04251}attP2  |
| 30488 | Toll-7    | FBgn0034476 | CG8595  | P{TRIP.HM05230}attP2   |
| 34853 | Toll-9    | FBgn0036978 | CG5528  | P{TRIP.HMS00171}attP2  |
| 30535 | Toll-9    | FBgn0036978 | CG5528  | P{TRIP.HM05227}attP2   |
| 28519 | Tollo     | FBgn0029114 | CG6890  | P{TRIP.HM05005}attP2   |
| 26005 | Tom40     | FBgn0016041 | CG12157 | P{TRIP.JF02030}attP2   |
| 43966 | Tom70     | FBgn0032397 | CG6756  | P{TRIP.GL01576}attP2   |
| 36669 | tomb      | FBgn0031715 | CG14016 | P{TRIP.HMS01557}attP2  |
| 29573 | tomb      | FBgn0033074 | CG8330  | P{TRIP.JF03252}attP2   |
| 31980 | tom       | FBgn0030412 | CG17762 | P{TRIP.JF03414}attP2   |
| 35424 | Top1      | FBgn0004924 | CG6146  | P{TRIP.GL00347}attP2   |
| 31342 | Top2      | FBgn0284220 | CG10223 | P{TRIP.JF01300}attP2   |
| 35416 | Top2      | FBgn0284220 | CG10223 | P{TRIP.GL00338}attP2   |
| 44451 | Top3      | FBgn0040268 | CG10123 | P{TRIP.GLC01603}attP2  |
| 31480 | Top3      | FBgn0026015 | CG3458  | P{TRIP.JF01282}attP2   |
| 34671 | Topors    | FBgn0267351 | CG15104 | P{TRIP.HMS01149}attP2  |
| 33627 | tor       | FBgn0003733 | CG1389  | P{TRIP.HMS00021}attP2  |
| 34639 | Tor       | FBgn0021796 | CG5092  | P{TRIP.HMS01114}attP2  |
| 50620 | Torsin    | FBgn0025615 | CG3024  | P{TRIP.HMC02987}attP2  |
| 30985 | Torsin    | FBgn0025615 | CG3024  | VDR C.30985            |
| 33937 | tos       | FBgn0015553 | CG10387 | P{TRIP.HMS00887}attP2  |
| 55378 | TotA      | FBgn0028396 | CG31509 | P{TRIP.HMC04066}attP2  |
| 51407 | TotC      | FBgn0044812 | CG31508 | P{TRIP.GLC01771}attP40 |
| 14420 | TotC      | FBgn0044812 | CG31508 | VDR C.14420            |
| 31637 | tou       | FBgn0033636 | CG10897 | P{TRIP.JF01424}attP2   |
| 35790 | tou       | FBgn0033636 | CG10897 | P{TRIP.GL00397}attP2   |
| 53704 | tow       | FBgn0035719 | CG14821 | P{TRIP.HMJ21747}attP40 |
| 33679 | toy       | FBgn0019650 | CG11186 | P{TRIP.HMS00544}attP2  |
| 31749 | Tpc1      | FBgn0037852 | CG6608  | P{TRIP.HM04059}attP2   |
| 26304 | Tpi       | FBgn0086355 | CG2171  | P{TRIP.JF02074}attP2   |
| 27053 | TpnC41C   | FBgn0013348 | CG2981  | P{TRIP.JF02379}attP2   |
| 26172 | TpnC47D   | FBgn0010423 | CG9073  | P{TRIP.JF02067}attP2   |
| 53259 | Tpr2      | FBgn0032586 | CG4599  | P{TRIP.GLC01819}attP2  |
| 57488 | Tps1      | FBgn0027560 | CG4104  | P{TRIP.HMC04801}attP40 |
| 28512 | tra       | FBgn0003741 | CG16724 | P{TRIP.JF03132}attP2   |
| 28018 | tra2      | FBgn0003742 | CG10128 | P{TRIP.JF02852}attP2   |
| 42549 | Traf-like | FBgn0030748 | CG4394  | P{TRIP.HMJ02121}attP40 |
| 55226 | Traf4     | FBgn0026319 | CG3048  | P{TRIP.GLC01843}attP2  |
| 33931 | Traf6     | FBgn0265464 | CG10961 | P{TRIP.HMS00880}attP2  |
| 28542 | tral      | FBgn0041775 | CG10686 | P{TRIP.HM05028}attP2   |
| 42523 | trbl      | FBgn0028978 | CG5408  | P{TRIP.HMJ02089}attP40 |
| 28326 | trc       | FBgn0003744 | CG8637  | P{TRIP.JF02961}attP2   |
| 56890 | Trc8      | FBgn0039668 | CG2304  | P{TRIP.HMC04111}attP40 |
| 35794 | tre-1     | FBgn0046687 | CG3171  | P{TRIP.GL00258}attP2   |
| 33718 | Tre1      | FBgn0046687 | CG3171  | P{TRIP.HMS00599}attP2  |
| 51810 | Treh      | FBgn0003748 | CG9364  | P{TRIP.HMC03381}attP40 |
| 40881 | trem      | FBgn0038767 | CG4413  | P{TRIP.HMS02049}attP2  |
| 42880 | Tret1-1   | FBgn0050035 | CG30035 | P{TRIP.HMS02573}attP2  |

|        |          |             |         |                        |
|--------|----------|-------------|---------|------------------------|
| 36835  | Trf2     | FBgn0261793 | CG18009 | P{TRIP.GL01076}attP2   |
| 41966  | Trf4-1   | FBgn0030049 | CG11265 | P{TRIP.HMS02363}attP2  |
| 25842  | Trh      | FBgn0035187 | CG9122  | P{TRIP.JF01863}attP2   |
| 33612  | trh      | FBgn0262139 | CG42865 | P{TRIP.HMS00002}attP2  |
| 27986  | trh      | FBgn0262139 | CG42865 | P{TRIP.JF02188}attP2   |
| 27732  | trio     | FBgn0024277 | CG18214 | P{TRIP.JF02815}attP2   |
| 34978  | Trip1    | FBgn0015834 | CG8882  | P{TRIP.HMS01387}attP2  |
| 36825  | TrissinR | FBgn0085410 | CG34381 | P{TRIP.GL01058}attP2   |
| 56040  | trk      | FBgn0003751 | CG5619  | P{TRIP.HMC04348}attP40 |
| 40940  | Trl      | FBgn0013263 | CG33261 | P{TRIP.HMS02188}attP2  |
| 27546  | Trn      | FBgn0024921 | CG7398  | P{TRIP.JF02697}attP2   |
| 28525  | trn      | FBgn0010452 | CG11280 | P{TRIP.HM05011}attP2   |
| 25988  | Trn-SR   | FBgn0031456 | CG2848  | P{TRIP.JF02010}attP2   |
| 38298  | trol     | FBgn0284408 | CG33950 | P{TRIP.HMS01759}attP40 |
| 31650  | trp      | FBgn0003861 | CG7875  | P{TRIP.JF01442}attP2   |
| 36780  | TrpA1    | FBgn0035934 | CG5751  | P{TRIP.JF02461}attP2   |
| 31299  | trpgamma | FBgn0032593 | CG5996  | P{TRIP.JF01244}attP2   |
| 26722  | trpl     | FBgn0005614 | CG18345 | P{TRIP.JF02264}attP2   |
| 104450 | trpl     | FBgn0005614 | CG18345 | VDRC.104450            |
| 52275  | trpl     | FBgn0005614 | CG18345 | P{trpl-GAL4.Z}3        |
| 31672  | trpm     | FBgn0265194 | CG44240 | P{TRIP.JF01465}attP2   |
| 35581  | trpm     | FBgn0265194 | CG44240 | P{TRIP.GL00173}attP2   |
| 31673  | trpml    | FBgn0262516 | CG8743  | P{TRIP.JF01466}attP2   |
| 36916  | trr      | FBgn0023518 | CG3848  | P{TRIP.HMS01019}attP2  |
| 38303  | Trs23    | FBgn0260861 | CG9298  | P{TRIP.HMS01765}attP40 |
| 33703  | trx      | FBgn0003862 | CG8651  | P{TRIP.HMS00580}attP2  |
| 34019  | Trx-2    | FBgn0040070 | CG31884 | P{TRIP.HMS00989}attP2  |
| 33721  | Trx-2    | FBgn0040070 | CG31884 | P{TRIP.HMS00603}attP2  |
| 32984  | Trxr-1   | FBgn0020653 | CG2151  | P{TRIP.HMS00784}attP2  |
| 42949  | Try29F   | FBgn0015316 | CG9564  | P{TRIP.HMS02642}attP40 |
| 31039  | Tsc1     | FBgn0026317 | CG6147  | P{TRIP.JF01484}attP2   |
| 35144  | Tsc1     | FBgn0026317 | CG6147  | P{TRIP.GL00012}attP2   |
| 55936  | Tsfl     | FBgn0022355 | CG6186  | P{TRIP.HMC04224}attP40 |
| 56015  | Tsf3     | FBgn0034094 | CG3666  | P{TRIP.HMC04311}attP40 |
| 38306  | TSG101   | FBgn0036666 | CG9712  | P{TRIP.HMS01768}attP40 |
| 35030  | tsh      | FBgn0003866 | CG1374  | P{TRIP.HMS01443}attP2  |
| 56967  | tsl      | FBgn0003867 | CG6705  | P{TRIP.HMC04408}attP40 |
| 34661  | Tsp      | FBgn0031850 | CG11326 | P{TRIP.HMS01138}attP2  |
| 44116  | Tsp      | FBgn0031850 | CG11326 | P{TRIP.HMS02838}attP40 |
| 40946  | Tsp26A   | FBgn0031760 | CG9093  | P{TRIP.HMS02194}attP40 |
| 40829  | Tsp29Fa  | FBgn0032074 | CG9494  | P{TRIP.HMS01995}attP40 |
| 39042  | Tsp29Fb  | FBgn0032075 | CG9496  | P{TRIP.HMS01962}attP40 |
| 40899  | Tsp2A    | FBgn0024361 | CG11415 | P{TRIP.HMS02147}attP40 |
| 39043  | Tsp33B   | FBgn0032376 | CG14936 | P{TRIP.HMS01963}attP40 |
| 25829  | Tsp39D   | FBgn0032943 | CG8666  | P{TRIP.JF01847}attP2   |
| 51706  | Tsp3A    | FBgn0040334 | CG10742 | P{TRIP.HMC03196}attP40 |
| 40900  | Tsp42A   | FBgn0033042 | CG14468 | P{TRIP.HMS02148}attP40 |
| 39044  | Tsp42Ea  | FBgn0029508 | CG18817 | P{TRIP.HMS01964}attP40 |
| 29392  | Tsp42Ej  | FBgn0033132 | CG12143 | P{TRIP.JF03325}attP2   |
| 57477  | Tsp42Er  | FBgn0033139 | CG12837 | P{TRIP.HMC04790}attP40 |
| 51458  | Tsp47F   | FBgn0033629 | CG9033  | P{TRIP.HMC03194}attP40 |
| 41681  | Tsp5D    | FBgn0029837 | CG4690  | P{TRIP.HMS02245}attP40 |
| 37490  | Tsp66E   | FBgn0035936 | CG4999  | P{TRIP.HMS01632}attP2  |
| 39045  | Tsp68C   | FBgn0043550 | CG32136 | P{TRIP.HMS01965}attP40 |
| 39046  | Tsp74F   | FBgn0036769 | CG5492  | P{TRIP.HMS01966}attP40 |
| 28515  | Tsp86D   | FBgn0037848 | CG4591  | P{TRIP.HM05001}attP2   |
| 40901  | Tsp96F   | FBgn0027865 | CG6120  | P{TRIP.HMS02149}attP40 |
| 39047  | Tsp97E   | FBgn0039465 | CG6323  | P{TRIP.HMS01967}attP40 |
| 33670  | tsr      | FBgn0011726 | CG4254  | P{TRIP.HMS00534}attP2  |
| 55647  | tst      | FBgn0039117 | CG10210 | P{TRIP.HMC03796}attP40 |
| 28955  | tsu      | FBgn0033378 | CG8781  | P{TRIP.HM05166}attP2   |
| 42849  | tth      | FBgn0030502 | CG12175 | P{TRIP.HMS02541}attP40 |
| 36748  | ttk      | FBgn0003870 | CG1856  | P{TRIP.HMS03008}attP2  |
| 44642  | ttm50    | FBgn0250874 | CG2713  | P{TRIP.GLC01620}attP2  |
| 5586   | ttm50    | FBgn0250874 | CG2713  | VDRC.5586              |
| 51480  | ttv      | FBgn0265974 | CG10117 | P{TRIP.HMC03225}attP40 |
| 36838  | tub      | FBgn0003882 | CG10520 | P{TRIP.GL01081}attP2   |
| 51771  | tud      | FBgn0003891 | CG9450  | P{TRIP.HMC03326}attP40 |

|       |           |             |         |                         |
|-------|-----------|-------------|---------|-------------------------|
| 34865 | Tudor-SN  | FBgn0035121 | CG7008  | P(TRIP.HMS00184)attP2   |
| 35007 | tum       | FBgn0086356 | CG13345 | P(TRIP.HMS01417)attP2   |
| 51763 | tup       | FBgn0003896 | CG10619 | P(TRIP.HMC03317)attP2   |
| 54850 | tuti      | FBgn0010473 | CG15427 | P(TRIP.HMJ21587)attP40  |
| 55735 | tw        | FBgn0086368 | CG12311 | P(TRIP.HMC03806)attP40  |
| 31963 | TwdIE     | FBgn0031957 | CG14534 | P(TRIP.JF02950)attP2    |
| 55975 | TwdIG     | FBgn0037225 | CG14643 | P(TRIP.HMC04271)attP40  |
| 54804 | TwdIL     | FBgn0039437 | CG6447  | P(TRIP.HMJ21498)attP40  |
| 40893 | TwdIQ     | FBgn0039448 | CG14250 | P(TRIP.HMS02141)attP2   |
| 57387 | TwdIW     | FBgn0038487 | CG4060  | P(TRIP.HMC04691)attP40  |
| 50989 | TwdIZ     | FBgn0052569 | CG32569 | P(TRIP.HMJ21100)attP40  |
| 33044 | twe       | FBgn0002673 | CG4965  | P(TRIP.HMS00642)attP2   |
| 35365 | twf       | FBgn0038206 | CG3172  | P(TRIP.GL00278)attP2    |
| 57375 | twf       | FBgn0038206 | CG3172  | P(TRIP.HMC04627)attP40  |
| 34543 | twf       | FBgn0038206 | CG3172  | P(UAS-twf.W)3           |
| 34330 | twi       | FBgn0003900 | CG2956  | P(TRIP.HMS01317)attP2   |
| 32901 | twin      | FBgn0011725 | CG31137 | P(TRIP.HMS00690)attP2   |
| 36689 | tws       | FBgn0004889 | CG6235  | P(TRIP.HMS01578)attP2   |
| 34792 | tx        | FBgn0263118 | CG5441  | P(TRIP.HMS00101)attP2   |
| 25857 | TyrR      | FBgn0038542 | CG7431  | P(TRIP.JF01878)attP2    |
| 27670 | TyrRII    | FBgn0038541 | CG16766 | P(TRIP.JF02749)attP2    |
| 33671 | U2A       | FBgn0033210 | CG1406  | P(TRIP.HMS00535)attP2   |
| 29304 | U2af38    | FBgn0017457 | CG3582  | P(TRIP.JF02444)attP2    |
| 27542 | U2af50    | FBgn0005411 | CG9998  | P(TRIP.JF02693)attP2    |
| 55210 | U4-U6-60K | FBgn0036733 | CG6322  | P(TRIP.HMC03931)attP40  |
| 25957 | Uba1      | FBgn0023143 | CG1782  | P(TRIP.JF01977)attP2    |
| 28569 | Uba2      | FBgn0029113 | CG7528  | P(TRIP.HM05055)attP2    |
| 51410 | Ubc-E2H   | FBgn0029996 | CG2257  | P(TRIP.GL.C01776)attP40 |
| 33509 | Ubc-E2H   | FBgn0029996 | CG2257  | VDRC.33509              |
| 42631 | UbcD6     | FBgn0004436 | CG2013  | P(TRIP.HMS02466)attP40  |
| 31972 | Ubc3a     | FBgn0061469 | CG6190  | P(TRIP.JF03406)attP2    |
| 38967 | Ubi-p5E   | FBgn0086558 | CG32744 | P(TRIP.HMS01881)attP40  |
| 33405 | Ubi-p63E  | FBgn0003943 | CG11624 | P(TRIP.HMS00284)attP2   |
| 35745 | UBL3      | FBgn0026076 | CG9038  | P(TRIP.HMS01487)attP2   |
| 44645 | Ubp64E    | FBgn0016756 | CG5486  | P(TRIP.HMC02352)attP2   |
| 39022 | UbpY      | FBgn0038862 | CG5798  | P(TRIP.HMS01941)attP2   |
| 33989 | UbqN      | FBgn0031057 | CG14224 | P(TRIP.HMS00949)attP2   |
| 34993 | Ubx       | FBgn0003944 | CG10388 | P(TRIP.HMS01403)attP2   |
| 35433 | Uch-L3    | FBgn0011327 | CG3431  | P(TRIP.GL00357)attP2    |
| 36077 | Uev1A     | FBgn0035601 | CG10640 | P(TRIP.GL00496)attP2    |
| 36116 | uex       | FBgn0262124 | CG42595 | P(TRIP.HMS01492)attP2   |
| 41823 | Ufd1-like | FBgn0036136 | CG6233  | P(TRIP.GL01251)attP2    |
| 50902 | UGP       | FBgn0035978 | CG4347  | P(TRIP.HMJ03120)attP40  |
| 53027 | Ugt       | FBgn0014075 | CG6850  | P(TRIP.HMJ21752)attP40  |
| 58116 | Ugt35b    | FBgn0026314 | CG6649  | P(TRIP.HMJ22053)attP40  |
| 53931 | Ugt36Ba   | FBgn0040262 | CG13270 | P(TRIP.HMJ21279)attP40  |
| 58196 | Ugt37a1   | FBgn0026756 | CG11012 | P(TRIP.HMJ22166)attP40  |
| 34095 | Ugt86Dc   | FBgn0040257 | CG4739  | P(TRIP.HMS00954)attP2   |
| 6019  | Ugt86Dc   | FBgn0040257 | CG4739  | VDRC.6019               |
| 53014 | Uhg1      | FBgn0045800 | CR32886 | P(TRIP.HMJ21736)attP40  |
| 28545 | Uhg3      | FBgn0259936 | CR32957 | P(TRIP.HM05031)attP2    |
| 51176 | Uhg5      | FBgn0083123 | CR42452 | P(TRIP.HMJ21153)attP40  |
| 38365 | uif       | FBgn0031879 | CG9138  | P(TRIP.HMS01834)attP2   |
| 31624 | Ulp1      | FBgn0027603 | CG12359 | P(TRIP.JF01409)attP2    |
| 31969 | unc       | FBgn0003950 | CG1501  | P(TRIP.JF03403)attP2    |
| 28951 | unc-104   | FBgn0267002 | CG8566  | P(TRIP.HM05162)attP2    |
| 43264 | unc-104   | FBgn0267002 | CG8566  | P(TRIP.GLC01453)attP2   |
| 40839 | Unc-115b  | FBgn0260463 | CG31332 | P(TRIP.HMS02005)attP40  |
| 55604 | unc-119   | FBgn0025549 | CG1659  | P(TRIP.HMC03736)attP2   |
| 29548 | unc-13    | FBgn0025726 | CG2999  | P(TRIP.JF02440)attP2    |
| 32033 | unc-13-4A | FBgn0035756 | CG32381 | P(TRIP.JF03340)attP2    |
| 36713 | unc-4     | FBgn0024184 | CG6269  | P(TRIP.HMS01603)attP2   |
| 33756 | unc-5     | FBgn0034013 | CG8166  | P(TRIP.HMS01099)attP2   |
| 8138  | unc-5     | FBgn0034013 | CG8166  | VDRC.8138               |
| 34000 | Unc-89    | FBgn0053519 | CG33519 | P(TRIP.HMS00963)attP2   |
| 51471 | unc-79    | FBgn0038693 | CG5237  | P(TRIP.HMC03213)attP2   |
| 57026 | unk       | FBgn0004395 | CG4620  | P(TRIP.HMS04470)attP40  |
| 29393 | unpg      | FBgn0015561 | CG1650  | P(TRIP.JF03326)attP2    |

|       |                              |             |         |                         |
|-------|------------------------------|-------------|---------|-------------------------|
| 32491 | Unr                          | FBgn0263352 | CG7015  | P{TRIP.HMS00494}attP2   |
| 32949 | up                           | FBgn0004169 | CG7107  | P{TRIP.HMS00743}attP2   |
| 33988 | upd2                         | FBgn0030904 | CG5988  | P{TRIP.HMS00948}attP2   |
| 32859 | upd3                         | FBgn0053542 | CG33542 | P{TRIP.HMS00646}attP2   |
| 43144 | Upf1                         | FBgn0030354 | CG1559  | P{TRIP.GL01485}attP2    |
| 31095 | Upf2                         | FBgn0029992 | CG2253  | P{TRIP.JF01560}attP2    |
| 44565 | Upf3                         | FBgn0034923 | CG11184 | P{TRIP.HMS02861}attP40  |
| 31720 | uri                          | FBgn0035025 | CG11416 | P{TRIP.HM04028}attP2    |
| 43253 | Use1                         | FBgn0035965 | CG14181 | P{TRIP.GL01442}attP2    |
| 42549 | Use1                         | FBgn0035965 | CG14181 | VDRC.42549              |
| 25982 | Usf                          | FBgn0029711 | CG17592 | P{TRIP.JF02004}attP2    |
| 32950 | ush                          | FBgn0003963 | CG2762  | P{TRIP.HMS00744}attP2   |
| 25862 | usnp                         | FBgn0034913 | CG11173 | P{TRIP.JF01883}attP2    |
| 36729 | usp                          | FBgn0003964 | CG4380  | P{TRIP.HMS01620}attP2   |
| 34708 | Usp7                         | FBgn0030366 | CG1490  | P{TRIP.HMS01187}attP2   |
| 34076 | Utx                          | FBgn0260749 | CG5640  | P{TRIP.HMS00575}attP2   |
| 34368 | Uvrag                        | FBgn0032499 | CG6116  | P{TRIP.HMS01357}attP2   |
| 29558 | uzip                         | FBgn0004055 | CG3533  | P{TRIP.JF03237}attP2    |
| 50641 | v                            | FBgn0003965 | CG2155  | P{TRIP.HMC03041}attP2   |
| 27684 | VAchT                        | FBgn0270928 | CG32848 | P{TRIP.JF02764}attP2    |
| 34354 | Vang                         | FBgn0015838 | CG8075  | P{TRIP.HMS01343}attP2   |
| 29394 | vap                          | FBgn0003969 | CG9209  | P{TRIP.JF03327}attP2    |
| 27312 | Vap-33-1                     | FBgn0029687 | CG5014  | P{TRIP.JF02621}attP2    |
| 28599 | vari                         | FBgn0250785 | CG9326  | P{TRIP.HM05087}attP2    |
| 34950 | vas                          | FBgn0283442 | CG46283 | P{TRIP.HMS00373}attP2   |
| 39059 | vav                          | FBgn0040068 | CG7893  | P{TRIP.HMS01979}attP2   |
| 29590 | veli                         | FBgn0039269 | CG7662  | P{TRIP.JF03269}attP2    |
| 51004 | ventrally-expressed-protein- | FBgn0053200 | CG33200 | P{TRIP.HM.J21118}attP40 |
| 57188 | verm                         | FBgn0261341 | CG8756  | P{TRIP.HMC04570}attP40  |
| 42016 | vfl                          | FBgn0259789 | CG12701 | P{TRIP.HMS02441}attP40  |
| 38706 | vfl                          | FBgn0259789 | CG12701 | VDRC.38706              |
| 31970 | vg                           | FBgn0003975 | CG3830  | P{TRIP.JF03404}attP2    |
| 41958 | VGAT                         | FBgn0033911 | CG8394  | P{TRIP.HMS02355}attP2   |
| 40927 | VGlut                        | FBgn0031424 | CG9887  | P{TRIP.HMS02175}attP40  |
| 26290 | Vha100-1                     | FBgn0028671 | CG1709  | P{TRIP.JF02059}attP2    |
| 57860 | Vha100-1                     | FBgn0028671 | CG1709  | P{TRIP.HM.J21907}attP40 |
| 31723 | Vha100-5                     | FBgn0032373 | CG12602 | P{TRIP.HM04032}attP2    |
| 38233 | Vha13                        | FBgn0283536 | CG6213  | P{TRIP.HMS01677}attP40  |
| 40923 | Vha16-1                      | FBgn0262736 | CG3161  | P{TRIP.HMS02171}attP40  |
| 57474 | Vha16-3                      | FBgn0028667 | CG32090 | P{TRIP.HMC04786}attP40  |
| 25803 | Vha16-5                      | FBgn0032294 | CG6737  | P{TRIP.JF01821}attP2    |
| 38996 | Vha26                        | FBgn0283535 | CG1088  | P{TRIP.HMS01912}attP2   |
| 33884 | Vha44                        | FBgn0262511 | CG8048  | P{TRIP.HMS00821}attP2   |
| 40884 | Vha55                        | FBgn0005671 | CG17369 | P{TRIP.HMS02132}attP40  |
| 42888 | Vha68-1                      | FBgn0265262 | CG12403 | P{TRIP.HMS02581}attP40  |
| 34582 | Vha68-2                      | FBgn0263598 | CG3762  | P{TRIP.HMS01056}attP2   |
| 42954 | Vha68-3                      | FBgn0032464 | CG5075  | P{TRIP.HMS02647}attP40  |
| 35029 | VhaAC39-1                    | FBgn0285910 | CG2934  | P{TRIP.HMS01442}attP2   |
| 38522 | VhaAC45                      | FBgn0262515 | CG8029  | P{TRIP.HMS01717}attP40  |
| 26004 | VhaM9.7-c                    | FBgn0028664 | CG11589 | P{TRIP.JF02029}attP2    |
| 57729 | VhaPPA1-1                    | FBgn0028662 | CG7007  | P{TRIP.HM.C04918}attP40 |
| 40896 | VhaSFD                       | FBgn0027779 | CG17332 | P{TRIP.HMS02144}attP40  |
| 50727 | Vhl                          | FBgn0041174 | CG13221 | P{TRIP.HMS02963}attP2   |
| 55953 | Victoria                     | FBgn0053117 | CG33117 | P{TRIP.HMC04242}attP40  |
| 35184 | vig                          | FBgn0024183 | CG4170  | P{TRIP.GL00056}attP2    |
| 41996 | vimar                        | FBgn0022960 | CG3572  | P{TRIP.HMS02397}attP40  |
| 41959 | Vinc                         | FBgn0004397 | CG3299  | P{TRIP.HMS02356}attP2   |
| 55694 | vir                          | FBgn0003977 | CG3496  | P{TRIP.HMC03908}attP40  |
| 58209 | vir-1                        | FBgn0043841 | CG31764 | P{TRIP.HM.J22179}attP40 |
| 35738 | vis                          | FBgn0033748 | CG8821  | P{TRIP.HMS01480}attP2   |
| 50895 | vkg                          | FBgn0016075 | CG16858 | P{TRIP.HMC02400}attP2   |
| 40925 | vlc                          | FBgn0259978 | CG8390  | P{TRIP.HMS02173}attP40  |
| 36877 | vlis                         | FBgn0003978 | CG10728 | P{TRIP.GL01036}attP2    |
| 31257 | Vmat                         | FBgn0260964 | CG33528 | P{TRIP.JF01198}attP2    |
| 27733 | vnd                          | FBgn0261930 | CG6172  | P{TRIP.JF02816}attP2    |
| 42625 | Vps13                        | FBgn0033194 | CG2093  | P{TRIP.HMS02460}attP40  |
| 38271 | Vps16A                       | FBgn0285911 | CG8454  | P{TRIP.HMS01716}attP40  |
| 38527 | Vps16B                       | FBgn0039702 | CG18112 | P{TRIP.HMS01732}attP40  |

|         |         |             |         |                        |
|---------|---------|-------------|---------|------------------------|
| 38995   | vps2    | FBgn0039402 | CG14542 | P(TRIP.HMS01911)attP40 |
| 40894   | Vps20   | FBgn0034744 | CG4071  | P(TRIP.HMS02142)attP40 |
| 38281   | vps24   | FBgn0037231 | CG9779  | P(TRIP.HMS01733)attP40 |
| 26286   | Vps25   | FBgn0022027 | CG14750 | P(TRIP.JF02055)attP2   |
| 38937   | Vps26   | FBgn0014411 | CG14804 | P(TRIP.HMS01769)attP40 |
| 44006   | Vps33B  | FBgn0039335 | CG5127  | P(TRIP.HMS02720)attP40 |
| 38944   | Vps35   | FBgn0034708 | CG5625  | P(TRIP.HMS01858)attP40 |
| 38286   | Vps36   | FBgn0086785 | CG10711 | P(TRIP.HMS01739)attP40 |
| 31751   | Vps4    | FBgn0283469 | CG6842  | P(TRIP.HM04061)attP2   |
| 38252   | Vps45   | FBgn0261049 | CG8228  | P(TRIP.HMS01696)attP40 |
| 110660  | Vps45   | FBgn0261049 | CG8228  | VDRC.110660            |
| 38212   | vret    | FBgn0263143 | CG4771  | P(TRIP.GL00653)attP40  |
| 34897   | vret    | FBgn0263143 | CG4771  | VDRC.34897             |
| 40862   | vri     | FBgn0016076 | CG14029 | P(TRIP.HMS02029)attP40 |
| 36704   | Vrp1    | FBgn0243516 | CG13503 | P(TRIP.HMS01593)attP2  |
| 50684   | Vsx1    | FBgn0263511 | CG4136  | P(TRIP.HMC03085)attP2  |
| 26223   | Vsx2    | FBgn0263512 | CG33980 | P(TRIP.JF02121)attP2   |
| 36786   | vtd     | FBgn0260987 | CG17436 | P(TRIP.GL00522)attP2   |
| 38526   | Vti1    | FBgn0260862 | CG3279  | P(TRIP.HMS01727)attP40 |
| 26228   | vvl     | FBgn0086680 | CG10037 | P(TRIP.JF02113)attP2   |
| 50657   | vvl     | FBgn0086680 | CG10037 | P(TRIP.HMC03058)attP2  |
| 33762   | w       | FBgn0003996 | CG2759  | P(TRIP.JF02387)attP2   |
| 58328   | wah     | FBgn0262527 | CG4699  | P(TRIP.HMJ22458)attP40 |
| 34915   | wal     | FBgn0010516 | CG8996  | P(TRIP.HMS01263)attP2  |
| 36076   | wal     | FBgn0010516 | CG8996  | VDRC.36076             |
| 36616   | wapl    | FBgn0004655 | CG3707  | P(TRIP.GL00576)attP2   |
| 36119   | WASp    | FBgn0024273 | CG1520  | P(TRIP.HMS01534)attP40 |
| 26215   | waw     | FBgn0024182 | CG1410  | P(TRIP.JF02113)attP2   |
| 29559   | wb      | FBgn0261563 | CG42677 | P(TRIP.JF03238)attP2   |
| 42642   | wcd     | FBgn0262560 | CG7989  | P(TRIP.HMS02478)attP2  |
| 32469   | wda     | FBgn0039067 | CG4448  | P(TRIP.HMS00469)attP2  |
| 38950   | wdb     | FBgn0027492 | CG5643  | P(TRIP.HMS01864)attP2  |
| 33339   | wde     | FBgn0027499 | CG12340 | P(TRIP.HMS00205)attP2  |
| 35654   | wdn     | FBgn0005642 | CG1454  | P(TRIP.GLV21019)attP2  |
| 28907   | wdp     | FBgn0034718 | CG3413  | P(TRIP.HM05118)attP2   |
| 33363   | WDR79   | FBgn0031782 | CG9226  | P(TRIP.HMS00235)attP2  |
| 32926   | Wdr82   | FBgn0032030 | CG17293 | P(TRIP.HMS00718)attP2  |
| 32952   | wds     | FBgn0040066 | CG17437 | P(TRIP.HMS00746)attP2  |
| 35170   | wee     | FBgn0011737 | CG4488  | P(TRIP.GL00039)attP2   |
| 35680   | wek     | FBgn0001990 | CG4148  | P(TRIP.GLV21045)attP2  |
| 53330   | wfs1    | FBgn0039003 | CG4917  | P(TRIP.HMC03559)attP40 |
| 33902   | wg      | FBgn0284084 | CG4889  | P(TRIP.HMS00844)attP2  |
| 50594   | wgn     | FBgn0030941 | CG6531  | P(TRIP.GLC01716)attP2  |
| 34066   | whd     | FBgn0261862 | CG12891 | P(TRIP.HMS00040)attP2  |
| 35746   | wibg    | FBgn0034918 | CG30176 | P(TRIP.HMS01488)attP2  |
| 43141   | wisp    | FBgn0260780 | CG15737 | P(TRIP.GL01482)attP2   |
| 41906   | wit     | FBgn0024179 | CG10776 | P(TRIP.HMS02298)attP2  |
| 27525   | wnd     | FBgn0036896 | CG8789  | P(TRIP.JF02675)attP2   |
| 42521   | Wnk     | FBgn0037098 | CG7177  | P(TRIP.HMJ02087)attP40 |
| 31989   | Wnt10   | FBgn0031903 | CG4971  | P(TRIP.JF03423)attP2   |
| 36722   | Wnt2    | FBgn0004360 | CG1916  | P(TRIP.HMS01613)attP2  |
| 29442   | Wnt4    | FBgn0028516 | CG3994  | P(TRIP.JF03378)attP2   |
| 38010   | Wnt4    | FBgn0028516 | CG3994  | VDRC.38010             |
| F001407 | Wnt4    | FBgn0028516 | CG3994  | M(UAS-Wnt4.ORF)ZH-86Fb |
| 34644   | Wnt5    | FBgn0010194 | CG6407  | P(TRIP.HMS01119)attP2  |
| 30493   | Wnt6    | FBgn0031902 | CG4969  | P(TRIP.HM05236)attP2   |
| 28947   | wntD    | FBgn0038134 | CG8458  | P(TRIP.HM05158)attP2   |
| 27057   | woc     | FBgn0010328 | CG5965  | P(TRIP.JF02398)attP2   |
| 34365   | wol     | FBgn0261020 | CG7870  | P(TRIP.HMS01354)attP2  |
| 29561   | wrapper | FBgn0025878 | CG10382 | P(TRIP.JF03240)attP2   |
| 105314  | wrapper | FBgn0025878 | CG10382 | VDRC.105314            |
| 38297   | WRNexo  | FBgn0038608 | CG7670  | P(TRIP.HMS01758)attP40 |
| 29457   | wry     | FBgn0051665 | CG31665 | P(TRIP.JF03393)attP2   |
| 42628   | Wsck    | FBgn0046685 | CG31127 | P(TRIP.HMS02463)attP40 |
| 31293   | wtrw    | FBgn0260005 | CG31284 | P(TRIP.JF01238)attP2   |
| 34064   | wts     | FBgn0011739 | CG12072 | P(TRIP.HMS00026)attP2  |
| 41899   | wts     | FBgn0011739 | CG12072 | P(TRIP.GL01331)attP2   |
| 27662   | wts     | FBgn0011739 | CG12072 | P(TRIP.JF02741)attP2   |

|       |           |             |         |                        |
|-------|-----------|-------------|---------|------------------------|
| 44250 | wts       | FBgn0011739 | CG12072 | P{UAS-wts.MYC}2        |
| 32430 | wun       | FBgn0016078 | CG8804  | P{TRiP.HMS00425}attP2  |
| 32423 | wun2      | FBgn0041087 | CG8805  | P{TRiP.HMS00418}attP2  |
| 31893 | wupA      | FBgn0283471 | CG7178  | P{TRiP.JF02172}attP2   |
| 58265 | wus       | FBgn0030805 | CG9089  | P{TRiP.HMJ22336}attP40 |
| 51747 | Wwox      | FBgn0031972 | CG7221  | P{TRiP.HMC03298}attP2  |
| 29309 | X11L      | FBgn0026313 | CG5675  | P{TRiP.JF02449}attP2   |
| 51468 | x16       | FBgn0028554 | CG10203 | P{TRiP.HMC03209}attP2  |
| 36755 | Xbp1      | FBgn0021872 | CG9415  | P{TRiP.HMS03015}attP2  |
| 44427 | xmas-2    | FBgn0286809 | CG46386 | P{TRiP.GLC01368}attP2  |
| 32894 | XNP       | FBgn0039338 | CG4548  | P{TRiP.HMS00683}attP2  |
| 29444 | XNP       | FBgn0039338 | CG4548  | P{TRiP.JF03380}attP2   |
| 51806 | Xpac      | FBgn0004832 | CG6358  | P{TRiP.HMC03365}attP40 |
| 53992 | Xpd       | FBgn0261850 | CG9433  | P{TRiP.HMJ21396}attP40 |
| 41021 | Xpd       | FBgn0261850 | CG9433  | VDRC.41021             |
| 34521 | Xrp1      | FBgn0261113 | CG17836 | P{TRiP.HMS00053}attP2  |
| 34100 | yata      | FBgn0260990 | CG1973  | P{TRiP.HMS01005}attP2  |
| 51043 | yellow-f  | FBgn0041710 | CG18550 | P{TRiP.HMJ21175}attP40 |
| 57809 | yellow-g  | FBgn0041709 | CG5717  | P{TRiP.HMJ21817}attP40 |
| 58129 | yellow-g2 | FBgn0035328 | CG13804 | P{TRiP.HMJ22078}attP40 |
| 35425 | yemalpha  | FBgn0005596 | CG14513 | P{TRiP.GL00349}attP2   |
| 31971 | yin       | FBgn0265575 | CG44402 | P{TRiP.JF03405}attP2   |
| 36874 | yip2      | FBgn0040064 | CG4600  | P{TRiP.GL01027}attP2   |
| 55293 | yip7      | FBgn0040060 | CG6457  | P{TRiP.HMC03980}attP2  |
| 54020 | Yippeee   | FBgn0026749 | CG1989  | P{TRiP.HMJ21446}attP40 |
| 34067 | yki       | FBgn0034970 | CG4005  | P{TRiP.HMS00041}attP2  |
| 38314 | Ykt6      | FBgn0260858 | CG1515  | P{TRiP.HMS01778}attP40 |
| 31152 | yl        | FBgn0004649 | CG1372  | P{TRiP.JF01629}attP2   |
| 31938 | YL-1      | FBgn0032321 | CG4621  | P{TRiP.JF02229}attP2   |
| 55356 | ymp       | FBgn0261287 | CG12250 | P{TRiP.HMC04043}attP40 |
| 55931 | Yp2       | FBgn0005391 | CG2979  | P{TRiP.HMC04219}attP40 |
| 38250 | yps       | FBgn0022959 | CG5654  | P{TRiP.HMS01694}attP40 |
| 38904 | yps       | FBgn0022959 | CG5654  | P{TRiP.GL00675}attP2   |
| 36118 | yrt       | FBgn0004049 | CG9764  | P{TRiP.HMS01532}attP2  |
| 31771 | yrt       | FBgn0004049 | CG9764  | P{TRiP.JF03429}attP2   |
| 34627 | YT521-B   | FBgn0027616 | CG12076 | P{TRiP.HMS01302}attP2  |
| 43237 | ytr       | FBgn0021895 | CG18426 | P{TRiP.GLC01424}attP2  |
| 29446 | z         | FBgn0004050 | CG7803  | P{TRiP.JF03382}attP2   |
| 32953 | Z600      | FBgn0004052 | CG17962 | P{TRiP.HMS00747}attP2  |
| 43317 | ZAP3      | FBgn0052685 | CG32685 | P{TRiP.HMS02701}attP40 |
| 43970 | ZAP3      | FBgn0052685 | CG32685 | P{TRiP.GL01580}attP2   |
| 31561 | Zasp52    | FBgn0265991 | CG30084 | P{TRiP.JF01133}attP2   |
| 34635 | zen       | FBgn0004053 | CG1046  | P{TRiP.HMS01109}attP2  |
| 34649 | zen2      | FBgn0004054 | CG1048  | P{TRiP.HMS01124}attP2  |
| 28960 | zetaCOP   | FBgn0040512 | CG3948  | P{TRiP.HM05171}attP2   |
| 55407 | zetaTry   | FBgn0011556 | CG12387 | P{TRiP.HMC04095}attP40 |
| 35678 | zf30C     | FBgn0270924 | CG3998  | P{TRiP.GLV21043}attP2  |
| 29347 | zfh1      | FBgn0004606 | CG1322  | P{TRiP.JF02509}attP2   |
| 50643 | zfh2      | FBgn0004607 | CG1449  | P{TRiP.HMC03043}attP2  |
| 42528 | Zfrp8     | FBgn0021875 | CG3260  | P{TRiP.HMJ02095}attP40 |
| 29360 | Zif       | FBgn0037446 | CG10267 | P{TRiP.JF02524}attP2   |
| 38259 | zip       | FBgn0005634 | CG15792 | P{TRiP.HMS01703}attP40 |
| 44120 | ZIP1      | FBgn0033096 | CG9428  | P{TRiP.HMS02842}attP40 |
| 32954 | Zip3      | FBgn0038412 | CG6898  | P{TRiP.HMS00748}attP2  |
| 37358 | Zip3      | FBgn0038412 | CG6898  | VDRC.37358             |
| 28005 | Zir       | FBgn0031216 | CG11376 | P{TRiP.JF02839}attP2   |
| 55635 | Zn72D     | FBgn0263603 | CG5215  | P{TRiP.HMC03782}attP40 |
| 39049 | ZnT35C    | FBgn0028516 | CG11376 | P{TRiP.HMS01969}attP40 |
| 3836  | ZnT35C    | FBgn0028516 | CG11376 | VDRC.3836              |
| 34039 | zormin    | FBgn0052311 | CG33484 | P{TRiP.HMS01014}attP2  |
| 27674 | zpg       | FBgn0024177 | CG10125 | P{TRiP.JF02753}attP2   |
| 36742 | zuc       | FBgn0261266 | CG12314 | P{TRiP.HMS03002}attP40 |
| 50667 | Zw        | FBgn0004057 | CG12529 | P{TRiP.HMC03068}attP2  |
| 55223 | zwilch    | FBgn0061476 | CG18729 | P{TRiP.GLC01840}attP2  |
| 36716 | Zyx       | FBgn0011642 | CG32018 | P{TRiP.HMS01606}attP40 |

**SI Appendix Table 3. Post-mortem tissue specimens from control and Alzheimer’s disease cases. PMI = post mortem interval.**

| Classification | Braak Stage | PMI (min) | Sex |
|----------------|-------------|-----------|-----|
| Control 1      | II          | 205       | F   |
| Control 2      | II          | 183       | F   |
| Control 3      | I-II        | 142       | M   |
| Control 4      | II          | 216       | M   |
| Control 5      | I-II        | 110       | M   |
| Control 6      | II          | 91        | M   |
| Control 7      | I-II        | 107       | M   |
| Control 8      | 0           | 218       | F   |
| AD 1           | V           | 113       | F   |
| AD 2           | V           | 132       | M   |
| AD 3           | VI          | 55        | M   |
| AD 4           | V           | 212       | M   |
| AD 5           | IV-V        | 55        | F   |
| AD 6           | V           | 112       | F   |
| AD 7           | V           | 176       | F   |
| AD 8           | V-VI        | 119       | F   |

### SI Appendix References

1. Merlo P, Frost B, Peng S, Yang YJ, Park PJ, Feany M. p53 prevents neurodegeneration by regulating synaptic genes. *Proc Natl Acad Sci.* 2014;111(50):18055–60.
2. Khurana V, Elson-Schwab I, Fulga TA, Sharp KA, Loewen CA, Mulkearns E, et al. Lysosomal dysfunction promotes cleavage and neurotoxicity of tau in vivo. *PLoS Genet.* 2010;6(7):e1001026.
3. Shulman JM, Chipendo P, Chibnik LB, Aubin C, Tran D, Keenan BT, et al. Functional screening of Alzheimer pathology genome-wide association signals in Drosophila. *Am J Hum Genet.* 2011; 88(2):232–8.
4. Appocher C, Klima R FF. Functional screening in Drosophila reveals the conserved role of REEP1 in promoting stress resistance and preventing the formation of Tau aggregates. *Hum Mol Gen.* 2014;23(25):6762–72.
5. Chen X; Li Y; Huang J; Cao D; Yang G; Liu W; Lu H; & Guo A. Study of tauopathies by comparing Drosophila and human tau in Drosophila. *Cell Tissue Res.* 2007;329:169–178
6. Butzlaff M, Hannan SB, Karsten P, Lenz S, Ng J, Voßfeldt H, Prüßing K, Pflanz R, Schulz JB, Rasse T VA. Impaired retrograde transport by the Dynein/Dynactin complex contributes to Tau-induced toxicity. *Hum Mol Gen.* 2015;24(13):3623–37.
7. Shulman JM, Feany MB. Genetic Modifiers of Tauopathy in Drosophila. *Genetics.* 2003;165(3):1233–42.



8. Bilen J BN. Genome-wide screen for modifiers of ataxin-3 neurodegeneration in *Drosophila*. *PLoS Genet*. 2007;3(10):1950–64.
9. Shulman JM, Imboywa S, Giagtzoglou N, Powers MP, Hu Y, Devenport D, et al. Functional screening in *Drosophila* identifies Alzheimer's disease susceptibility genes and implicates Tau-mediated mechanisms. *Hum Mol Genet*. 2014;23(4):870–7.
10. Ambegaokar SS JG. Functional genomic screen and network analysis reveal novel modifiers of tauopathy dissociated from tau phosphorylation. *Hum Mol Gen*. 2011;20(24):4947-77.
11. Khurana V, Lu Y, Steinhilb ML, Oldham S, Shulman JM, Feany MB. TOR-Mediated Cell-Cycle Activation Causes Neurodegeneration in a *Drosophila* Tauopathy Model. *Curr Biol*. 2006;16(3):230–41.
12. Frost B, Bardai FH, Feany MB. Lamin Dysfunction Mediates Neurodegeneration in Tauopathies. *Curr Biol*. 2016;26(1):129–36.
13. Frost B, Hemberg M, Lewis J, Feany MB. Tau promotes neurodegeneration through global chromatin relaxation. *Nat Neurosci*. 2014;17(3):357–66.
14. Loewen CA, Feany MB. The unfolded protein response protects from tau neurotoxicity in vivo. *PLoS One*. 2010;5(9): e13084.
